# Supplementary material for: RNA-Seq Analysis of Differential Gene Expression Responding to Different Rhizobium Strains in Soybean (Glycine max) Roots
Source: Front Plant Sci. 2016 May 30;7:721. doi: 10.3389/fpls.2016.00721 (PMC4885319; doi:10.3389/fpls.2016.00721)
Supplement: Supplementary file 2 [file Table2.XLSX]

## Sheet: Sheet1
Supplemental Table S2 Summary of the mapping results (mapping to reference genes and the genome).
Sample ID	Total Reads	Total BasePairs	Total Mapped Reads	Perfect Match	<=2bp Mismatch	Unique Match	Multi-position Match	Total Unmapped Reads
Map to Gene
CK-0.5hR	12,048,713(100.00%)	590,386,937(100.00%)	10,004,735(83.04%)	8,596,818(71.35%)	1,407,917(11.69%)	8,429,373(69.96%)	1,575,362(13.07%)	2,043,978(16.96%)
CK-7-24hR	12,440,330(100.00%)	609,576,170(100.00%)	10,298,604(82.78%)	8,841,276(71.07%)	1,457,328(11.71%)	8,709,296(70.01%)	1,589,308(12.78%)	2,141,726(17.22%)
CK-5dR	12,418,795(100.00%)	608,520,955(100.00%)	10,859,464(87.44%)	9,357,318(75.35%)	1,502,146(12.10%)	9,337,298(75.19%)	1,522,166(12.26%)	1,559,331(12.56%)
CK-16dR	12,594,403(100.00%)	617,125,747(100.00%)	10,933,994(86.82%)	9,436,193(74.92%)	1,497,801(11.89%)	9,417,886(74.78%)	1,516,108(12.04%)	1,660,409(13.18%)
CK-21dR	12,172,575(100.00%)	596,456,175(100.00%)	10,634,023(87.36%)	9,195,187(75.54%)	1,438,836(11.82%)	9,206,425(75.63%)	1,427,598(11.73%)	1,538,552(12.64%)
113-2-0.5hR	11,880,991(100.00%)	582,168,559(100.00%)	9,911,594(83.42%)	8,523,169(71.74%)	1,388,425(11.69%)	8,389,775(70.62%)	1,521,819(12.81%)	1,969,397(16.58%)
113-2-7-24hR	12,175,305(100.00%)	596,589,945(100.00%)	10,121,286(83.13%)	8,705,289(71.50%)	1,415,997(11.63%)	8,526,086(70.03%)	1,595,200(13.10%)	2,054,019(16.87%)
113-2-5dR	12,372,611(100.00%)	606,257,939(100.00%)	10,701,145(86.49%)	9,179,024(74.19%)	1,522,121(12.30%)	9,211,264(74.45%)	1,489,881(12.04%)	1,671,466(13.51%)
113-2-16dR	12,554,485(100.00%)	615,169,765(100.00%)	11,046,584(87.99%)	9,461,927(75.37%)	1,584,657(12.62%)	9,561,208(76.16%)	1,485,376(11.83%)	1,507,901(12.01%)
113-2-21dR	11,866,042(100.00%)	581,436,058(100.00%)	10,374,091(87.43%)	8,936,450(75.31%)	1,437,641(12.12%)	8,942,080(75.36%)	1,432,011(12.07%)	1,491,951(12.57%)
USDA205-0.5hR	12,163,641(100.00%)	596,018,409(100.00%)	10,227,888(84.09%)	8,744,986(71.89%)	1,482,902(12.19%)	8,629,517(70.95%)	1,598,371(13.14%)	1,935,753(15.91%)
USDA205-7-24hR	12,182,412(100.00%)	596,938,188(100.00%)	10,178,851(83.55%)	8,717,614(71.56%)	1,461,237(11.99%)	8,625,173(70.80%)	1,553,678(12.75%)	2,003,561(16.45%)
USDA205-5dR	12,528,106(100.00%)	613,877,194(100.00%)	10,720,332(85.57%)	9,089,498(72.55%)	1,630,834(13.02%)	9,194,764(73.39%)	1,525,568(12.18%)	1,807,774(14.43%)
USDA205-16dR	12,569,627(100.00%)	615,911,723(100.00%)	10,989,677(87.43%)	9,357,378(74.44%)	1,632,299(12.99%)	9,485,008(75.46%)	1,504,669(11.97%)	1,579,950(12.57%)
USDA205-21dR	12,406,599(100.00%)	607,923,351(100.00%)	10,700,460(86.25%)	9,174,285(73.95%)	1,526,175(12.30%)	9,284,399(74.83%)	1,416,061(11.41%)	1,706,139(13.75%)
Map to Geneome					<=3bp Mismatch
CK-0.5hR	12,048,713(100.00%)	590,386,937(100.00%)	9,387,441(77.91%)	7,835,513(65.03%)	1,551,928(12.88%)	7,923,934(65.77%)	1,463,507(12.15%)	2,661,272(22.09%)
CK-7-24hR	12,440,330(100.00%)	609,576,170(100.00%)	9,678,687(77.80%)	8,074,166(64.90%)	1,604,521(12.90%)	8,193,728(65.86%)	1,484,959(11.94%)	2,761,643(22.20%)
CK-5dR	12,418,795(100.00%)	608,520,955(100.00%)	10,370,335(83.51%)	8,714,794(70.17%)	1,655,541(13.33%)	8,945,333(72.03%)	1,425,002(11.47%)	2,048,460(16.49%)
CK-16dR	12,594,403(100.00%)	617,125,747(100.00%)	10,441,596(82.91%)	8,786,680(69.77%)	1,654,916(13.14%)	9,021,071(71.63%)	1,420,525(11.28%)	2,152,807(17.09%)
CK-21dR	12,172,575(100.00%)	596,456,175(100.00%)	10,215,825(83.92%)	8,623,801(70.85%)	1,592,024(13.08%)	8,884,134(72.98%)	1,331,691(10.94%)	1,956,750(16.08%)
113-2-0.5hR	11,880,991(100.00%)	582,168,559(100.00%)	9,338,046(78.60%)	7,804,740(65.69%)	1,533,306(12.91%)	7,917,405(66.64%)	1,420,641(11.96%)	2,542,945(21.40%)
113-2-7-24hR	12,175,305(100.00%)	596,589,945(100.00%)	9,519,856(78.19%)	7,954,497(65.33%)	1,565,359(12.86%)	8,025,367(65.92%)	1,494,489(12.27%)	2,655,449(21.81%)
113-2-5dR	12,372,611(100.00%)	606,257,939(100.00%)	10,153,872(82.07%)	8,481,121(68.55%)	1,672,751(13.52%)	8,769,972(70.88%)	1,383,900(11.19%)	2,218,739(17.93%)
113-2-16dR	12,554,485(100.00%)	615,169,765(100.00%)	10,531,144(83.88%)	8,787,621(70.00%)	1,743,523(13.89%)	9,096,696(72.46%)	1,434,448(11.43%)	2,023,341(16.12%)
113-2-21dR	11,866,042(100.00%)	581,436,058(100.00%)	9,951,781(83.87%)	8,362,074(70.47%)	1,589,707(13.40%)	8,604,772(72.52%)	1,347,009(11.35%)	1,914,261(16.13%)
USDA205-0.5hR	12,163,641(100.00%)	596,018,409(100.00%)	9,682,155(79.60%)	8,053,612(66.21%)	1,628,543(13.39%)	8,173,125(67.19%)	1,509,030(12.41%)	2,481,486(20.40%)
USDA205-7-24hR	12,182,412(100.00%)	596,938,188(100.00%)	9,554,899(78.43%)	7,949,842(65.26%)	1,605,057(13.18%)	8,106,618(66.54%)	1,448,281(11.89%)	2,627,513(21.57%)
USDA205-5dR	12,528,106(100.00%)	613,877,194(100.00%)	10,160,671(81.10%)	8,385,210(66.93%)	1,775,461(14.17%)	8,751,384(69.85%)	1,409,287(11.25%)	2,367,435(18.90%)
USDA205-16dR	12,569,627(100.00%)	615,911,723(100.00%)	10,521,670(83.71%)	8,736,386(69.50%)	1,785,284(14.20%)	9,099,236(72.39%)	1,422,434(11.32%)	2,047,957(16.29%)
USDA205-21dR	12,406,599(100.00%)	607,923,351(100.00%)	10,306,362(83.07%)	8,618,683(69.47%)	1,687,679(13.60%)	8,969,042(72.29%)	1,337,320(10.78%)	2,100,237(16.93%)
