# Supplementary material for: RNA-Seq Analysis of Differential Gene Expression Responding to Different Rhizobium Strains in Soybean (Glycine max) Roots
Source: Front Plant Sci. 2016 May 30;7:721. doi: 10.3389/fpls.2016.00721 (PMC4885319; doi:10.3389/fpls.2016.00721)
Supplement: Supplementary file 3 [file Table3.XLSX]

## Sheet: CK-0.5hR-VS-113-2-0.5hR.GeneDif
Table S3:The information data of the DEGs in the 15 comparisons - CK-0.5hR vs 113-2-0.5hR
CK-0.5hR-VS-113-2-0.5hR.GeneDif	Gene_length	CK-0.5hR-Expression	113-2-0.5hR-Expression	CK-0.5hR-RPKM	113-2-0.5hR-RPKM	log2 Ratio(113-2-0.5hR/CK-0.5hR)	Up-Down-Regulation(113-2-0.5hR/CK-0.5hR)	P-value	FDR	KEGG Orthology	GO Component	GO Function	GO Process	Blast nr
Glyma03g32830	772	0	15	0.01	2.32025	7.85814	Up	2.94e-05	0.000649693	-	-	-	-	gi|255645809|gb|ACU23395.1|/8.86431e-28/unknown [Glycine max]
Glyma11g10361	988	0	16	0.01	1.93386	7.59534	Up	1.47e-05	0.000352129	K09872|1|2e-14|78.2|osa:4343122|aquaporin PIP	GO:0016020//membrane	-	-	gi|356540958|ref|XP_003538951.1|/5.23717e-117/PREDICTED: aquaporin PIP2-5-like [Glycine max]
Glyma07g06490	2356	0	15	0.01	0.760287	6.24847	Up	2.94e-05	0.000649361	K12347|1|0.0|691|vvi:100262579|natural resistance-associated macrophage protein	GO:0044464//cell part	GO:0008324//cation transmembrane transporter activity	GO:0006812//cation transport;GO:0030003//cellular cation homeostasis	gi|356522536|ref|XP_003529902.1|/0/PREDICTED: metal transporter Nramp2-like [Glycine max]
Glyma08g04750	986	1	31	0.120536	3.75445	4.96106	Up	7.35e-09	3.15e-07	-	-	-	-	-
Glyma05g29370	971	1	30	0.122398	3.68947	4.91376	Up	1.43e-08	5.91e-07	K00799|1|6e-84|308|gmx:548031|glutathione S-transferase [EC:2.5.1.18]	-	GO:0016765//transferase activity, transferring alkyl or aryl (other than methyl) groups	-	gi|356512535|ref|XP_003524974.1|/6.87006e-114/PREDICTED: probable glutathione S-transferase-like [Glycine max]
Glyma01g24115	1109	2	42	0.214335	4.52251	4.39918	Up	5.34e-11	2.99e-09	-	-	-	-	gi|449445762|ref|XP_004140641.1|/1.58516e-10/PREDICTED: proton pump-interactor 1-like [Cucumis sativus]
Glyma11g14660	1360	1	20	0.0873887	1.75611	4.3288	Up	1.05e-05	0.000257086	K14016|1|9e-109|392|gmx:100803896|ubiquitin fusion degradation protein 1	-	-	-	gi|356538998|ref|XP_003537987.1|/0/PREDICTED: ubiquitin fusion degradation protein 1 homolog [Glycine max]
Glyma20g31820	1307	3	39	0.272797	3.56329	3.70731	Up	2.77e-09	1.25e-07	-	-	-	-	gi|357443379|ref|XP_003591967.1|/2.09188e-45/hypothetical protein MTR_1g095730 [Medicago truncatula]
Glyma14g01900	5723	2	26	0.0415337	0.542514	3.70731	Up	1.53e-06	4.48e-05	K05666|1|0.0|661|olu:OSTLU_35503|ATP-binding cassette, subfamily C (CFTR/MRP), member 2;K05658|2|3e-56|219|vvi:100248698|ATP-binding cassette, subfamily B (MDR/TAP), member 1	GO:0031224//intrinsic to membrane	GO:0017111//nucleoside-triphosphatase activity;GO:0015405;GO:0032559	GO:0006810//transport;GO:0009207	gi|356553519|ref|XP_003545103.1|/0/PREDICTED: ABC transporter C family member 3-like [Glycine max]
Glyma12g06620	1023	2	26	0.232353	3.035	3.70731	Up	1.53e-06	4.48e-05	K14016|1|7e-116|415|gmx:100803896|ubiquitin fusion degradation protein 1	-	-	-	gi|356544568|ref|XP_003540721.1|/0/PREDICTED: ubiquitin fusion degradation protein 1 homolog [Glycine max]
Glyma08g07130	1595	2	25	0.149027	1.87172	3.65072	Up	2.86e-06	7.93e-05	K12930|1|3e-106|384|rcu:RCOM_1324500|anthocyanidin 3-O-glucosyltransferase [EC:2.4.1.115];K10757|3|4e-98|357|ath:AT5G17050|flavonol 3-O-glucosyltransferase [EC:2.4.1.91]	-	GO:0016740//transferase activity	-	gi|358248090|ref|NP_001240066.1|/0/kaempferol 3-O-beta-D-galactosyltransferase-like [Glycine max]
Glyma14g33940	555	3	35	0.642425	7.53072	3.55119	Up	3.33e-08	1.3e-06	-	-	-	-	gi|357489305|ref|XP_003614940.1|/2.23774e-11/hypothetical protein MTR_5g061550 [Medicago truncatula]
Glyma08g25590	3645	2	22	0.0652119	0.720753	3.4663	Up	1.85e-05	0.000430831	K04733|1|1e-67|257|smo:SELMODRAFT_159261|interleukin-1 receptor-associated kinase 4 [EC:2.7.11.1];K13416|4|3e-63|242|ath:AT4G33430|brassinosteroid insensitive 1-associated receptor kinase 1 [EC:2.7.10.1 2.7.11.1]	GO:0016020//membrane	GO:0004674//protein serine/threonine kinase activity	-	gi|356523547|ref|XP_003530399.1|/0/PREDICTED: probable LRR receptor-like serine/threonine-protein kinase At1g56130-like [Glycine max]
Glyma18g06400	2424	2	21	0.09806	1.03454	3.39918	Up	3.42e-05	0.000742679	-	-	-	GO:0006810//transport	gi|356569482|ref|XP_003552929.1|/0/PREDICTED: uncharacterized protein LOC100804488 [Glycine max]
Glyma19g39030	1382	23	219	1.97794	18.9233	3.25809	Up	9.63e-42	3.34e-39	K14493|1|7e-35|146|ppp:PHYPADRAFT_118478|gibberellin receptor GID1 [EC:3.-.-.-]	-	-	-	gi|356572688|ref|XP_003554498.1|/7.73496e-179/PREDICTED: probable carboxylesterase 15-like [Glycine max]
Glyma10g35710	1490	5	46	0.398821	3.68666	3.2085	Up	1.16e-09	5.52e-08	-	-	-	-	gi|357443379|ref|XP_003591967.1|/2.66692e-39/hypothetical protein MTR_1g095730 [Medicago truncatula]
Glyma01g39360	1155	5	45	0.514496	4.65256	3.17679	Up	2.11e-09	9.67e-08	K10863|1|6e-08|57.0|ath:AT5G01310|aprataxin [EC:3.-.-.-]	-	-	-	gi|356496900|ref|XP_003517303.1|/6.42229e-80/PREDICTED: transcription factor HEC1-like [Glycine max]
Glyma10g23520	2378	5	45	0.249892	2.25976	3.17679	Up	2.11e-09	9.66e-08	-	-	-	GO:0008152//metabolic process	gi|356533279|ref|XP_003535193.1|/0/PREDICTED: cucumisin-like [Glycine max]
Glyma14g10260	2091	4	34	0.227353	1.94172	3.09433	Up	3.11e-07	1.04e-05	K14207|1|2e-151|534|rcu:RCOM_0012320|solute carrier family 38 (sodium-coupled neutral amino acid transporter), member 2	GO:0031224//intrinsic to membrane	-	-	gi|356554046|ref|XP_003545360.1|/0/PREDICTED: probable sodium-coupled neutral amino acid transporter 6-like [Glycine max]
Glyma13g40501	681	10	84	1.74521	14.7297	3.07726	Up	4.82e-16	4.29e-14	-	-	-	-	-
Glyma08g15840	1161	4	33	0.40947	3.39425	3.05126	Up	5.62e-07	1.8e-05	K01213|1|3e-81|300|pop:POPTR_552472|galacturan 1,4-alpha-galacturonidase [EC:3.2.1.67];K01184|2|8e-79|292|pop:POPTR_763686|polygalacturonase [EC:3.2.1.15]	-	GO:0016798//hydrolase activity, acting on glycosyl bonds	GO:0008152//metabolic process	gi|356528552|ref|XP_003532865.1|/0/PREDICTED: polygalacturonase-like [Glycine max]
Glyma01g17590	480	10	79	2.47601	19.6538	2.98872	Up	8.9e-15	7.12e-13	-	-	-	-	-
Glyma17g34220	794	20	149	2.99367	22.4092	2.90411	Up	5.89e-26	9.77e-24	K13993|1|8e-81|298|gmx:100500666|HSP20 family protein	-	-	-	gi|123580|sp|P05477.1|HSP21_SOYBN/1.36767e-87/RecName: Full=17.9 kDa class II heat shock protein
Glyma06g15310	956	5	35	0.621594	4.37191	2.81422	Up	7.28e-07	2.27e-05	-	-	-	-	gi|356516315|ref|XP_003526841.1|/7.10893e-23/PREDICTED: root meristem growth factor 9-like [Glycine max]
Glyma07g05370	1585	10	67	0.749834	5.04786	2.75103	Up	8.45e-12	5.16e-10	-	-	-	-	gi|356520206|ref|XP_003528755.1|/4.34291e-150/PREDICTED: NAC domain-containing protein 69-like [Glycine max]
Glyma09g33480	1938	51	323	3.1276	19.9026	2.66983	Up	5.53e-50	2.78e-47	K00600|1|0.0|886|gmx:100499635|glycine hydroxymethyltransferase [EC:2.1.2.1]	GO:0043231//intracellular membrane-bounded organelle	GO:0016742//hydroxymethyl-, formyl- and related transferase activity;GO:0048037//cofactor binding	GO:0009069//serine family amino acid metabolic process;GO:0006730//one-carbon metabolic process	gi|356531377|ref|XP_003534254.1|/0/PREDICTED: serine hydroxymethyltransferase, mitochondrial-like [Glycine max]
Glyma03g07680	1563	20	122	1.52078	9.321	2.61568	Up	2.18e-19	2.45e-17	K05277|1|3e-48|191|mtr:MTR_5g011250|leucoanthocyanidin dioxygenase [EC:1.14.11.19];K06892|4|5e-46|183|pop:POPTR_550478|	-	GO:0046914//transition metal ion binding;GO:0016706//oxidoreductase activity, acting on paired donors, with incorporation or reduction of molecular oxygen, 2-oxoglutarate as one donor, and incorporation of one atom each of oxygen into both donors;GO:0016701//oxidoreductase activity, acting on single donors with incorporation of molecular oxygen;GO:0016491//oxidoreductase activity	GO:0008152//metabolic process	gi|356503301|ref|XP_003520449.1|/0/PREDICTED: leucoanthocyanidin dioxygenase-like [Glycine max]
Glyma20g33090	1938	38	228	2.33037	14.0489	2.59183	Up	1.24e-34	3.09e-32	K00517|1|5e-92|337|osa:4348172|[EC:1.14.-.-];K13261|2|2e-78|291|gmx:100776878|cytochrome P450, family 93, subfamily A, polypeptide 1 (3,9-dihydroxypterocarpan 6a-monooxygenase) [EC:1.14.13.28];K16084|3|3e-78|291|osa:4329723|cytochrome P450, family 76, subfamily M, polypeptide 7 (ent-cassa-12,15-diene 11-hydroxylase) [EC:1.14.13.145];K05280|5|3e-71|268|osa:4348304|flavonoid 3'-monooxygenase [EC:1.…	-	GO:0046872//metal ion binding	-	gi|356576337|ref|XP_003556289.1|/0/PREDICTED: 7-ethoxycoumarin O-deethylase-like [Glycine max]
Glyma05g02760	1741	6	36	0.409588	2.46925	2.59183	Up	1.52e-06	4.45e-05	K00517|1|8e-106|382|ath:AT3G26190|[EC:1.14.-.-]	GO:0031224//intrinsic to membrane	GO:0016491//oxidoreductase activity;GO:0005506//iron ion binding	GO:0008152//metabolic process	gi|358248834|ref|NP_001239692.1|/0/cytochrome P450 71A9 precursor [Glycine max]
Glyma08g07091	1140	12	71	1.25104	7.4373	2.57165	Up	1.21e-11	7.27e-10	-	-	-	-	gi|255554603|ref|XP_002518340.1|/7.03565e-71/conserved hypothetical protein [Ricinus communis]
Glyma06g45043	2610	88	515	4.00716	23.5629	2.55586	Up	4.82e-75	5.49e-72	K13066|1|5e-34|144|pop:POPTR_824484|caffeic acid 3-O-methyltransferase [EC:2.1.1.68];K05279|2|7e-34|144|aly:ARALYDRAFT_495497|flavonol 3-O-methyltransferase [EC:2.1.1.76]	-	GO:0008171//O-methyltransferase activity;GO:0008171//O-methyltransferase activity	-	gi|371502138|ref|NP_001243073.1|/5.11276e-145/3'-hydroxy-N-methyl-(S)-coclaurine 4'-O-methyltransferase-like [Glycine max]
Glyma07g31310	2123	50	287	2.79907	16.1433	2.52792	Up	4.94e-42	1.73e-39	K00422|1|4e-127|453|vvi:100256583|polyphenol oxidase [EC:1.10.3.1]	GO:0044424//intracellular part	-	-	gi|356521321|ref|XP_003529305.1|/0/PREDICTED: polyphenol oxidase A1, chloroplastic [Glycine max]
Glyma17g04590	4181	46	256	1.30759	7.31175	2.4833	Up	6.26e-37	1.73e-34	K05658|1|0.0|1920|mtr:MTR_4g124040|ATP-binding cassette, subfamily B (MDR/TAP), member 1	-	-	-	gi|356564678|ref|XP_003550577.1|/0/PREDICTED: ABC transporter B family member 11-like [Glycine max]
Glyma18g42610	3606	9	50	0.296627	1.65579	2.4808	Up	2.79e-08	1.1e-06	K08286|1|2e-105|382|ath:AT4G28490|protein-serine/threonine kinase [EC:2.7.11.-];K00924|3|1e-102|373|ath:AT1G75820|[EC:2.7.1.-]	-	-	-	gi|356566654|ref|XP_003551545.1|/0/PREDICTED: probable LRR receptor-like serine/threonine-protein kinase At4g08850-like [Glycine max]
Glyma06g12470	1541	8	44	0.616995	3.40966	2.4663	Up	2.17e-07	7.41e-06	K00660|1|2e-107|388|gmx:100775264|chalcone synthase [EC:2.3.1.74]	-	GO:0016747//transferase activity, transferring acyl groups other than amino-acyl groups	GO:0008152//metabolic process	gi|356515949|ref|XP_003526659.1|/0/PREDICTED: chalcone synthase 2-like [Glycine max]
Glyma05g32040	1865	65	357	4.14218	22.8587	2.46428	Up	1.95e-50	9.94e-48	K09286|1|3e-27|121|ath:AT1G43160|EREBP-like factor	-	-	GO:0009737//response to abscisic acid stimulus;GO:0050794//regulation of cellular process;GO:0006950//response to stress	gi|255639269|gb|ACU19933.1|/7.26122e-85/unknown [Glycine max]
Glyma20g23721	1218	9	49	0.878192	4.80408	2.45165	Up	4.77e-08	1.8e-06	-	-	-	-	gi|356575422|ref|XP_003555840.1|/7.21123e-53/PREDICTED: uncharacterized protein LOC100784754 [Glycine max]
Glyma18g00730	3897	9	49	0.274477	1.50151	2.45165	Up	4.77e-08	1.8e-06	K12818|1|0.0|1482|gmx:100790809|ATP-dependent RNA helicase DHX8/PRP22 [EC:3.6.4.13]	GO:0043231//intracellular membrane-bounded organelle;GO:0044444//cytoplasmic part	GO:0003724//RNA helicase activity;GO:0003676//nucleic acid binding;GO:0042623//ATPase activity, coupled;GO:0032559	-	gi|356569633|ref|XP_003553003.1|/0/PREDICTED: probable pre-mRNA-splicing factor ATP-dependent RNA helicase-like [Glycine max]
Glyma15g10890	1890	9	48	0.565946	3.03278	2.4219	Up	8.14e-08	2.96e-06	K01915|1|0.0|832|gmx:100780873|glutamine synthetase [EC:6.3.1.2]	GO:0009536//plastid;GO:0009536//plastid;GO:0009536//plastid	GO:0016211;GO:0032559;GO:0016211;GO:0032559;GO:0016211;GO:0032559	GO:0006541//glutamine metabolic process;GO:0071941;GO:0006541//glutamine metabolic process;GO:0071941;GO:0006541//glutamine metabolic process;GO:0071941	gi|356555606|ref|XP_003546121.1|/0/PREDICTED: glutamine synthetase leaf isozyme, chloroplastic-like [Glycine max]
Glyma15g42490	693	32	169	5.48796	29.1216	2.40775	Up	4.61e-24	6.9e-22	-	-	-	-	gi|357457525|ref|XP_003599043.1|/7.21938e-12/hypothetical protein MTR_3g027030 [Medicago truncatula]
Glyma03g22230	1702	27	142	1.88538	9.963	2.40173	Up	2.15e-20	2.56e-18	K08286|1|1e-59|229|ath:AT5G47750|protein-serine/threonine kinase [EC:2.7.11.-];K08282|3|9e-56|216|ath:AT3G45780|non-specific serine/threonine protein kinase [EC:2.7.11.1]	-	GO:0004672//protein kinase activity;GO:0019900//kinase binding	-	gi|356503073|ref|XP_003520336.1|/0/PREDICTED: serine/threonine-protein kinase OXI1-like [Glycine max]
Glyma07g18280	1486	16	83	1.27966	6.66992	2.38191	Up	2.21e-12	1.44e-10	K05277|1|3e-65|247|pop:POPTR_646527|leucoanthocyanidin dioxygenase [EC:1.14.11.19]	-	GO:0016491//oxidoreductase activity	GO:0008152//metabolic process	gi|356521024|ref|XP_003529158.1|/0/PREDICTED: leucoanthocyanidin dioxygenase-like [Glycine max]
Glyma18g09670	2472	8	41	0.384624	1.9806	2.36442	Up	1.07e-06	3.24e-05	K13457|1|1e-117|422|rcu:RCOM_0742270|disease resistance protein RPM1	-	GO:0032559	GO:0012501//programmed cell death;GO:0006950//response to stress	gi|356566971|ref|XP_003551698.1|/0/PREDICTED: disease resistance protein RPM1-like [Glycine max]
Glyma18g51320	1493	8	41	0.636832	3.27933	2.36442	Up	1.07e-06	3.24e-05	K12135|1|2e-68|258|aly:ARALYDRAFT_488429|zinc finger protein CONSTANS;K03539|3|1e-09|63.2|bdi:100830772|ribonuclease P/MRP protein subunit RPP1 [EC:3.1.26.5];K12127|4|8e-08|57.0|smo:SELMODRAFT_438647|pseudo-response regulator 1;K12130|5|1e-07|56.6|rcu:RCOM_0969830|pseudo-response regulator 5	GO:0044464//cell part	GO:0046914//transition metal ion binding	-	gi|351726327|ref|NP_001235843.1|/4.69598e-169/zinc finger protein CONSTANS-LIKE 2 [Glycine max]
Glyma09g07310	526	11	51	2.48543	11.5783	2.21986	Up	1.52e-07	5.33e-06	K08912|1|5e-53|204|gmx:100805310|light-harvesting complex II chlorophyll a/b binding protein 1	GO:0009521;GO:0031224//intrinsic to membrane;GO:0009534//chloroplast thylakoid	GO:0046906//tetrapyrrole binding;GO:0043169//cation binding	GO:0006464//cellular protein modification process;GO:0006091//generation of precursor metabolites and energy	gi|449527933|ref|XP_004170962.1|/5.14613e-52/PREDICTED: chlorophyll a-b binding protein of LHCII type I, chloroplastic-like [Cucumis sativus]
Glyma11g35770	3145	8	37	0.302318	1.40489	2.21632	Up	8.6e-06	0.000216134	-	-	-	GO:0006810//transport	gi|356538011|ref|XP_003537498.1|/0/PREDICTED: cation/H(+) antiporter 15-like [Glycine max]
Glyma13g27680	1822	43	197	2.80488	12.9116	2.20265	Up	4.07e-25	6.41e-23	K15283|1|0.0|721|gmx:100804205|solute carrier family 35, member E1	GO:0031224//intrinsic to membrane;GO:0031090//organelle membrane	GO:0015291//secondary active transmembrane transporter activity;GO:0015119;GO:0005342//organic acid transmembrane transporter activity	GO:0009642//response to light intensity;GO:0051707//response to other organism;GO:0009746;GO:0015712//hexose phosphate transport;GO:0015711//organic anion transport;GO:0015717//triose phosphate transport;GO:0019953//sexual reproduction;GO:0034285;GO:0015979//photosynthesis	gi|356548981|ref|XP_003542877.1|/0/PREDICTED: glucose-6-phosphate/phosphate translocator 2, chloroplastic-like [Glycine max]
Glyma05g03560	1063	14	63	1.56527	7.07732	2.17679	Up	7.61e-09	3.25e-07	K09286|1|8e-30|129|ath:AT4G25480|EREBP-like factor	-	-	-	gi|356513683|ref|XP_003525540.1|/1.13241e-128/PREDICTED: dehydration-responsive element-binding protein 1F-like [Glycine max]
Glyma20g27790	2947	16	72	0.645259	2.91752	2.17679	Up	6.31e-10	3.1e-08	K04733|1|1e-55|216|smo:SELMODRAFT_230241|interleukin-1 receptor-associated kinase 4 [EC:2.7.11.1];K00924|3|6e-53|207|osa:4333912|[EC:2.7.1.-];K13430|5|5e-51|201|vvi:100254113|serine/threonine-protein kinase PBS1 [EC:2.7.11.1]	-	GO:0016740//transferase activity	-	gi|356574384|ref|XP_003555328.1|/0/PREDICTED: cysteine-rich receptor-like protein kinase 10-like [Glycine max]
Glyma02g03420	1779	80	360	5.34452	24.1651	2.17679	Up	5.57e-44	2.19e-41	K11820|1|3e-125|447|ath:AT1G24100|N-hydroxythioamide S-beta-glucosyltransferase [EC:2.4.1.195];K13691|3|2e-123|441|vvi:100242294|pathogen-inducible salicylic acid glucosyltransferase [EC:2.4.1.-]	-	GO:0035251//UDP-glucosyltransferase activity	-	gi|356501236|ref|XP_003519432.1|/0/PREDICTED: UDP-glycosyltransferase 74B1-like [Glycine max]
Glyma02g05450	1511	9	40	0.707901	3.16124	2.15887	Up	5.2e-06	0.000136437	K00475|1|0.0|742|gmx:732548|naringenin 3-dioxygenase [EC:1.14.11.9]	-	GO:0016706//oxidoreductase activity, acting on paired donors, with incorporation or reduction of molecular oxygen, 2-oxoglutarate as one donor, and incorporation of one atom each of oxygen into both donors;GO:0016706//oxidoreductase activity, acting on paired donors, with incorporation or reduction of molecular oxygen, 2-oxoglutarate as one donor, and incorporation of one atom each of oxygen into…	GO:0008152//metabolic process;GO:0008152//metabolic process	gi|351724303|ref|NP_001236797.1|/0/flavanone 3-hydroxylase [Glycine max]
Glyma19g41580	549	41	176	8.87577	38.2826	2.10875	Up	1.8e-21	2.29e-19	-	-	-	-	gi|356572924|ref|XP_003554615.1|/3.11009e-90/PREDICTED: transcription factor bHLH149-like [Glycine max]
Glyma17g12710	1134	17	72	1.78168	7.58195	2.08933	Up	1.7e-09	7.9e-08	-	-	-	-	gi|358248696|ref|NP_001239669.1|/3.03484e-66/uncharacterized protein LOC100780553 [Glycine max]
Glyma12g12230	4769	32	133	0.797475	3.33032	2.06215	Up	3.75e-16	3.39e-14	K05279|1|1e-59|231|aly:ARALYDRAFT_495497|flavonol 3-O-methyltransferase [EC:2.1.1.76];K16040|4|7e-57|221|vvi:100233030|trans-resveratrol di-O-methyltransferase [EC:2.1.1.240];K13066|5|7e-57|221|pop:POPTR_824484|caffeic acid 3-O-methyltransferase [EC:2.1.1.68]	-	GO:0008171//O-methyltransferase activity	-	gi|356542907|ref|XP_003539906.1|/0/PREDICTED: 3'-hydroxy-N-methyl-(S)-coclaurine 4'-O-methyltransferase-like [Glycine max]
Glyma09g23170	1888	13	54	0.818344	3.41549	2.06131	Up	2.48e-07	8.43e-06	-	-	-	-	gi|356530790|ref|XP_003533963.1|/7.28004e-125/PREDICTED: probable membrane-associated kinase regulator 6-like [Glycine max]
Glyma08g15350	1468	49	191	3.96702	15.5371	1.96959	Up	2.44e-21	3.06e-19	K09286|1|4e-25|114|ath:AT1G43160|EREBP-like factor	-	-	GO:0009737//response to abscisic acid stimulus;GO:0050794//regulation of cellular process;GO:0006950//response to stress	gi|255639269|gb|ACU19933.1|/3.13912e-101/unknown [Glycine max]
Glyma08g14900	2366	16	62	0.80371	3.12924	1.96106	Up	8.43e-08	3.07e-06	K09755|1|0.0|652|rcu:RCOM_0193830|ferulate-5-hydroxylase [EC:1.14.-.-]	-	GO:0004497//monooxygenase activity;GO:0005506//iron ion binding	GO:0008152//metabolic process	gi|356525525|ref|XP_003531375.1|/0/PREDICTED: cytochrome P450 750A1-like [Glycine max]
Glyma15g08580	1195	27	103	2.68528	10.2927	1.93848	Up	6.18e-12	3.86e-10	K09286|1|3e-24|111|mtr:MTR_4g100420|EREBP-like factor;K14516|2|4e-24|110|rcu:RCOM_1007740|ethylene-responsive transcription factor 1	GO:0043231//intracellular membrane-bounded organelle	-	GO:0009743//response to carbohydrate stimulus;GO:0050794//regulation of cellular process;GO:0006351//transcription, DNA-dependent	gi|356557719|ref|XP_003547160.1|/5.98924e-145/PREDICTED: ethylene-responsive transcription factor ERF091-like [Glycine max]
Glyma13g17930	4430	584	2208	15.6676	59.5192	1.92557	Up	1.6e-222	2.31e-218	K05658|1|0.0|1966|mtr:MTR_4g124040|ATP-binding cassette, subfamily B (MDR/TAP), member 1	-	-	-	gi|356545820|ref|XP_003541332.1|/0/PREDICTED: ABC transporter B family member 11-like [Glycine max]
Glyma15g04910	891	34	128	4.53519	17.1551	1.9194	Up	2.51e-14	1.95e-12	-	-	-	-	gi|356558425|ref|XP_003547507.1|/3.25949e-27/PREDICTED: uncharacterized protein LOC100787477 [Glycine max]
Glyma02g18090	1363	32	120	2.79028	10.5135	1.91376	Up	1.8e-13	1.28e-11	K10082|1|1e-39|162|mtr:MTR_5g031140|lectin, mannose-binding 2	-	GO:0048029//monosaccharide binding	-	gi|380848783|ref|NP_001237210.2|/2.23045e-146/lectin precursor [Glycine max]
Glyma11g03910	1654	40	147	2.87421	10.6131	1.88461	Up	6.92e-16	6.13e-14	K09286|1|4e-53|207|ath:AT4G17500|EREBP-like factor;K14517|2|5e-45|180|ath:AT5G47220|ethylene-responsive transcription factor 2	-	-	GO:0006351//transcription, DNA-dependent	gi|356540552|ref|XP_003538752.1|/1.21129e-104/PREDICTED: ethylene-responsive transcription factor 1A-like [Glycine max]
Glyma11g13780	1852	14	51	0.898424	3.28845	1.87194	Up	2.57e-06	7.2e-05	K01188|1|0.0|666|sbi:SORBI_06g019840|beta-glucosidase [EC:3.2.1.21]	-	-	-	gi|356541159|ref|XP_003539048.1|/0/PREDICTED: beta-glucosidase 12-like, partial [Glycine max]
Glyma08g47070	1333	20	72	1.78318	6.45006	1.85486	Up	2.57e-08	1.02e-06	-	-	-	-	gi|356524529|ref|XP_003530881.1|/9.0625e-153/PREDICTED: uncharacterized protein LOC100788542 [Glycine max]
Glyma04g01490	797	51	181	7.60512	27.1195	1.83429	Up	1.38e-18	1.52e-16	-	-	-	-	gi|356508426|ref|XP_003522958.1|/4.6277e-51/PREDICTED: uncharacterized protein LOC100816105 [Glycine max]
Glyma18g49350	3063	92	324	3.56973	12.6316	1.82315	Up	8.15e-32	1.82e-29	-	-	-	-	gi|356567040|ref|XP_003551731.1|/0/PREDICTED: uncharacterized protein LOC100785051 [Glycine max]
Glyma08g47000	3086	27	95	1.03983	3.67612	1.82184	Up	2.47e-10	1.27e-08	K04733|1|5e-55|214|smo:SELMODRAFT_159261|interleukin-1 receptor-associated kinase 4 [EC:2.7.11.1];K13415|3|3e-53|209|rcu:RCOM_0478150|protein brassinosteroid insensitive 1 [EC:2.7.10.1 2.7.11.1]	-	-	-	gi|356524519|ref|XP_003530876.1|/0/PREDICTED: putative receptor protein kinase ZmPK1-like [Glycine max]
Glyma14g06400	1645	112	393	8.09183	28.5291	1.8179	Up	4.2e-38	1.21e-35	K06892|1|3e-68|257|pop:POPTR_550478|;K05277|2|3e-64|244|pop:POPTR_646527|leucoanthocyanidin dioxygenase [EC:1.14.11.19];K05278|3|4e-62|237|rcu:RCOM_1031440|flavonol synthase [EC:1.14.11.23]	-	GO:0003824//catalytic activity;GO:0046914//transition metal ion binding	GO:0008152//metabolic process;GO:0009628//response to abiotic stimulus	gi|356551436|ref|XP_003544081.1|/0/PREDICTED: codeine O-demethylase-like [Glycine max]
Glyma11g34740	2130	14	49	0.781165	2.74712	1.81422	Up	6.48e-06	0.000167155	-	-	-	-	gi|356539915|ref|XP_003538438.1|/0/PREDICTED: uncharacterized protein LOC100783667 [Glycine max]
Glyma02g42180	1860	473	1645	30.2233	105.612	1.80504	Up	1.93e-152	1.05e-148	K13065|1|1e-25|116|ath:AT5G48930|shikimate O-hydroxycinnamoyltransferase [EC:2.3.1.133]	-	GO:0016747//transferase activity, transferring acyl groups other than amino-acyl groups	GO:0009628//response to abiotic stimulus	gi|356501127|ref|XP_003519380.1|/0/PREDICTED: uncharacterized acetyltransferase At3g50280 [Glycine max]
Glyma02g43830	974	24	83	2.92851	10.1761	1.79694	Up	4.75e-09	2.1e-07	-	-	-	-	gi|351722685|ref|NP_001234949.1|/1.5311e-129/uncharacterized protein LOC100305920 [Glycine max]
Glyma02g06460	1979	33	114	1.98181	6.87893	1.79536	Up	6.43e-12	3.99e-10	K08150|1|4e-68|257|vvi:100268023|MFS transporter, SP family, solute carrier family 2 (myo-inositol transporter), member 13	GO:0031224//intrinsic to membrane	GO:0016628//oxidoreductase activity, acting on the CH-CH group of donors, NAD or NADP as acceptor;GO:0022891//substrate-specific transmembrane transporter activity	GO:0008152//metabolic process;GO:0071702	gi|356502185|ref|XP_003519901.1|/0/PREDICTED: probable polyol transporter 3-like [Glycine max]
Glyma09g27180	1215	33	114	3.22799	11.2044	1.79536	Up	6.43e-12	3.98e-10	K09286|1|4e-36|150|ath:AT4G25480|EREBP-like factor	-	-	GO:0006351//transcription, DNA-dependent	gi|55824656|gb|AAV66464.1|/1.21587e-92/drought responsive element binding protein [Glycine soja]
Glyma13g29690	1425	14	48	1.16764	4.02242	1.78447	Up	1.02e-05	0.00025205	K09874|1|2e-103|374|aly:ARALYDRAFT_492969|aquaporin NIP	GO:0031224//intrinsic to membrane	-	GO:0006810//transport	gi|363806664|ref|NP_001242005.1|/1.68072e-152/uncharacterized protein LOC100812577 [Glycine max]
Glyma15g04900	439	39	132	10.5583	35.9063	1.76586	Up	2.63e-13	1.84e-11	-	-	-	-	-
Glyma06g19810	915	25	84	3.24723	10.9628	1.75533	Up	6.78e-09	2.91e-07	-	-	-	-	gi|356516708|ref|XP_003527035.1|/2.88766e-26/PREDICTED: uncharacterized protein LOC100500306 [Glycine max]
Glyma18g32860	5471	355	1192	7.7118	26.0178	1.75436	Up	9.45e-107	2.15e-103	K05666|1|0.0|650|olu:OSTLU_35503|ATP-binding cassette, subfamily C (CFTR/MRP), member 2;K05658|2|1e-54|214|aly:ARALYDRAFT_494323|ATP-binding cassette, subfamily B (MDR/TAP), member 1	GO:0031224//intrinsic to membrane	GO:0017111//nucleoside-triphosphatase activity;GO:0015405;GO:0032559	GO:0006810//transport;GO:0009207	gi|356566246|ref|XP_003551345.1|/0/PREDICTED: ABC transporter C family member 3-like [Glycine max]
Glyma20g16920	1070	34	112	3.7765	12.4996	1.72676	Up	3.44e-11	1.98e-09	K09286|1|1e-31|135|vvi:100254616|EREBP-like factor	-	-	-	gi|351726443|ref|NP_001235847.1|/2.38747e-118/uncharacterized protein LOC100305726 [Glycine max]
Glyma15g08470	1800	17	56	1.12246	3.71516	1.72676	Up	3.08e-06	8.47e-05	K00924|1|1e-38|159|ath:AT3G59420|[EC:2.7.1.-];K13430|4|5e-34|144|rcu:RCOM_1078760|serine/threonine-protein kinase PBS1 [EC:2.7.11.1]	GO:0044464//cell part	GO:0000166//nucleotide binding;GO:0016301//kinase activity	GO:0009987//cellular process;GO:0048364//root development;GO:0009791//post-embryonic development	gi|356549280|ref|XP_003543022.1|/4.39221e-164/PREDICTED: serine/threonine-protein kinase-like protein ACR4-like [Glycine max]
Glyma01g34380	1096	35	115	3.79535	12.5299	1.72307	Up	2.01e-11	1.18e-09	-	-	-	-	gi|356505805|ref|XP_003521680.1|/4.2043e-126/PREDICTED: uncharacterized protein LOC100527010 [Glycine max]
Glyma06g35710	1243	44	144	4.20703	13.8342	1.71736	Up	6.78e-14	5.09e-12	K09286|1|6e-21|100|aly:ARALYDRAFT_494572|EREBP-like factor	GO:0044451//nucleoplasm part	GO:0005488//binding;GO:0001071//nucleic acid binding transcription factor activity	GO:0009743//response to carbohydrate stimulus;GO:0002218//activation of innate immune response;GO:0006351//transcription, DNA-dependent;GO:0009873//ethylene mediated signaling pathway	gi|356517102|ref|XP_003527229.1|/2.38932e-59/PREDICTED: ethylene-responsive transcription factor 4-like [Glycine max]
Glyma12g03600	1495	36	117	2.86191	9.34558	1.70731	Up	1.82e-11	1.07e-09	K09422|1|7e-92|336|vvi:100233133|myb proto-oncogene protein, plant	GO:0043231//intracellular membrane-bounded organelle	GO:0003676//nucleic acid binding	-	gi|351727379|ref|NP_001235623.1|/3.52323e-124/MYB transcription factor MYB54 [Glycine max]
Glyma11g03470	576	25	81	5.15836	16.7928	1.70286	Up	2.53e-08	1e-06	-	-	-	-	gi|255631091|gb|ACU15911.1|/8.308e-28/unknown [Glycine max]
Glyma20g38720	2806	17	55	0.720038	2.34065	1.70076	Up	4.79e-06	0.000126835	K00615|1|0.0|1432|gmx:100805786|transketolase [EC:2.2.1.1]	GO:0009534//chloroplast thylakoid	GO:0043169//cation binding;GO:0016744	-	gi|356576867|ref|XP_003556551.1|/0/PREDICTED: transketolase, chloroplastic-like [Glycine max]
Glyma11g02860	2207	57	184	3.06949	9.95582	1.69754	Up	4.24e-17	4.2e-15	K00030|1|6e-133|473|vvi:100242228|isocitrate dehydrogenase (NAD+) [EC:1.1.1.41];K09588|2|2e-87|322|gmx:100775886|cytochrome P450, family 90, subfamily A, polypeptide 1 [EC:1.14.-.-];K09587|5|3e-85|314|gmx:100789515|cytochrome P450, family 90, subfamily B, polypeptide 1 (steroid 22-alpha-hydroxylase) [EC:1.14.13.-]	-	GO:0016709//oxidoreductase activity, acting on paired donors, with incorporation or reduction of molecular oxygen, NAD(P)H as one donor, and incorporation of one atom of oxygen;GO:0005506//iron ion binding	GO:0008152//metabolic process	gi|356540462|ref|XP_003538708.1|/0/PREDICTED: cytochrome P450 87A3-like [Glycine max]
Glyma02g47560	1075	22	71	2.43225	7.88699	1.69718	Up	2e-07	6.9e-06	K08913|1|6e-150|453|gmx:100793702|light-harvesting complex II chlorophyll a/b binding protein 2	GO:0009521;GO:0031224//intrinsic to membrane;GO:0009534//chloroplast thylakoid;GO:0009521;GO:0031224//intrinsic to membrane;GO:0009534//chloroplast thylakoid	GO:0046906//tetrapyrrole binding;GO:0043169//cation binding;GO:0046906//tetrapyrrole binding;GO:0043169//cation binding	GO:0006464//cellular protein modification process;GO:0006091//generation of precursor metabolites and energy;GO:0006464//cellular protein modification process;GO:0006091//generation of precursor metabolites and energy	gi|358248712|ref|NP_001240183.1|/7.76833e-149/uncharacterized protein LOC100793702 [Glycine max]
Glyma12g03780	961	14	45	1.73141	5.59179	1.69137	Up	3.91e-05	0.000835733	K14488|1|1e-52|204|gmx:100500377|SAUR family protein	-	-	-	gi|351725859|ref|NP_001237107.1|/1.64057e-51/uncharacterized protein LOC100500377 [Glycine max]
Glyma13g18400	844	38	122	5.35101	17.2615	1.68968	Up	9.54e-12	5.8e-10	K09286|1|7e-18|89.4|ath:AT4G17490|EREBP-like factor	-	-	-	gi|351721044|ref|NP_001238476.1|/7.07312e-69/uncharacterized protein LOC100500462 [Glycine max]
Glyma04g02920	3393	15	48	0.525414	1.68935	1.68494	Up	2.24e-05	0.000510564	K13420|1|1e-117|423|ath:AT5G46330|LRR receptor-like serine/threonine-protein kinase FLS2 [EC:2.7.11.1]	GO:0016020//membrane	GO:0004672//protein kinase activity	GO:0008152//metabolic process	gi|356509642|ref|XP_003523555.1|/0/PREDICTED: probable LRR receptor-like serine/threonine-protein kinase At4g36180-like [Glycine max]
Glyma02g34670	866	858	2732	117.751	376.725	1.67777	Up	1.68e-227	3.64e-223	-	-	-	GO:0045333//cellular respiration	gi|255571994|ref|XP_002526938.1|/8.78631e-46/hypothetical protein RCOM_0530890 [Ricinus communis]
Glyma08g16050	1131	78	248	8.19646	26.1849	1.67566	Up	3.81e-22	5.12e-20	-	-	-	-	gi|255630536|gb|ACU15626.1|/1.42382e-15/unknown [Glycine max]
Glyma04g38270	1763	111	352	7.48282	23.8425	1.67188	Up	1.1e-30	2.27e-28	K14498|1|5e-179|625|gmx:547968|serine/threonine-protein kinase SRK2 [EC:2.7.11.1]	-	GO:0004672//protein kinase activity;GO:0032559	GO:0006464//cellular protein modification process	gi|351734430|ref|NP_001238298.1|/0/protein kinase [Glycine max]
Glyma13g02220	1000	24	76	2.85237	9.0756	1.66983	Up	1.04e-07	3.73e-06	-	-	-	-	gi|356548425|ref|XP_003542602.1|/6.89742e-40/PREDICTED: uncharacterized protein LOC100791854 [Glycine max]
Glyma15g40450	935	27	85	3.43199	10.856	1.66137	Up	2.03e-08	8.13e-07	K03541|1|2e-49|194|vvi:100243967|photosystem II 10kDa protein	GO:0009523//photosystem II;GO:0009534//chloroplast thylakoid	-	GO:0044237//cellular metabolic process	gi|351722402|ref|NP_001236219.1|/6.39859e-61/uncharacterized protein LOC100305752 [Glycine max]
Glyma14g05090	1173	47	147	4.76205	14.9651	1.65195	Up	1.78e-13	1.28e-11	-	-	-	-	gi|356554452|ref|XP_003545560.1|/9.67004e-116/PREDICTED: uncharacterized protein LOC100782670 [Glycine max]
Glyma02g46810	5217	132	411	3.0071	9.40768	1.64547	Up	8.49e-35	2.14e-32	K05666|1|0.0|651|olu:OSTLU_35503|ATP-binding cassette, subfamily C (CFTR/MRP), member 2;K05658|2|1e-52|207|vvi:100259227|ATP-binding cassette, subfamily B (MDR/TAP), member 1	GO:0031224//intrinsic to membrane	GO:0017111//nucleoside-triphosphatase activity;GO:0015405;GO:0032559	GO:0006810//transport;GO:0009207	gi|356499431|ref|XP_003518544.1|/0/PREDICTED: ABC transporter C family member 3-like [Glycine max]
Glyma10g11700	2089	20	62	1.13785	3.54417	1.63914	Up	2.19e-06	6.23e-05	K13366|1|0.0|951|gmx:100805182|polyamine oxidase (propane-1,3-diamine-forming) [EC:1.5.3.14]	-	GO:0016647//oxidoreductase activity, acting on the CH-NH group of donors, oxygen as acceptor;GO:0050662//coenzyme binding	GO:0008152//metabolic process	gi|356534600|ref|XP_003535841.1|/0/PREDICTED: polyamine oxidase 1-like [Glycine max]
Glyma06g45031	2450	62	192	3.0076	9.35829	1.63763	Up	5.73e-17	5.59e-15	-	-	-	-	-
Glyma15g01690	1285	55	170	5.08691	15.7982	1.6349	Up	3.71e-15	3.08e-13	K05236|1|1e-46|185|aly:ARALYDRAFT_475134|coatomer protein complex, subunit alpha (xenin)	GO:0030120//vesicle coat;GO:0030120//vesicle coat	GO:0004683//calmodulin-dependent protein kinase activity;GO:0004683//calmodulin-dependent protein kinase activity	GO:0015031//protein transport;GO:0015031//protein transport	gi|356556044|ref|XP_003546337.1|/1.65251e-180/PREDICTED: coatomer subunit beta'-2-like [Glycine max]
Glyma01g04250	1766	265	815	17.834	55.1098	1.62767	Up	2.52e-66	2.06e-63	K11820|1|7e-134|476|ath:AT1G24100|N-hydroxythioamide S-beta-glucosyltransferase [EC:2.4.1.195];K13691|2|3e-133|474|vvi:100242294|pathogen-inducible salicylic acid glucosyltransferase [EC:2.4.1.-]	-	GO:0035251//UDP-glucosyltransferase activity	-	gi|356498018|ref|XP_003517852.1|/0/PREDICTED: UDP-glycosyltransferase 74B1-like [Glycine max]
Glyma19g34670	639	55	169	10.2295	31.5826	1.62639	Up	5.64e-15	4.62e-13	K14516|1|3e-33|139|rcu:RCOM_1007740|ethylene-responsive transcription factor 1	-	-	-	gi|356570640|ref|XP_003553493.1|/1.78414e-91/PREDICTED: ethylene-responsive transcription factor 1B-like [Glycine max]
Glyma01g42350	1420	20	61	1.67393	5.12983	1.61568	Up	3.35e-06	9.16e-05	K05277|1|0.0|714|gmx:547615|leucoanthocyanidin dioxygenase [EC:1.14.11.19]	-	GO:0016706//oxidoreductase activity, acting on paired donors, with incorporation or reduction of molecular oxygen, 2-oxoglutarate as one donor, and incorporation of one atom each of oxygen into both donors	GO:0008152//metabolic process	gi|358248024|ref|NP_001239794.1|/0/anthocyanidin synthase [Glycine max]
Glyma11g32931	3761	63	192	1.99082	6.0962	1.61455	Up	1.18e-16	1.11e-14	K14326|1|3e-101|369|osa:4349244|regulator of nonsense transcripts 1 [EC:3.6.4.-]	-	-	-	gi|356537819|ref|XP_003537422.1|/0/PREDICTED: uncharacterized ATP-dependent helicase C29A10.10c-like [Glycine max]
Glyma03g28731	1258	60	181	5.66846	17.1814	1.59982	Up	1.35e-15	1.16e-13	-	-	-	-	gi|356504744|ref|XP_003521155.1|/2.28058e-49/PREDICTED: uncharacterized protein LOC100793368 [Glycine max]
Glyma07g10311	1208	62	187	6.09985	18.4857	1.59957	Up	4.61e-16	4.11e-14	K12126|1|5e-12|70.5|ath:AT1G09530|phytochrome-interacting factor 3;K10863|3|1e-05|49.7|aly:ARALYDRAFT_486946|aprataxin [EC:3.-.-.-]	GO:0043231//intracellular membrane-bounded organelle	-	-	gi|356520601|ref|XP_003528950.1|/6.07765e-145/PREDICTED: transcription factor BEE 3-like [Glycine max]
Glyma08g21900	1299	17	50	1.55537	4.59645	1.56326	Up	4.1e-05	0.000870733	K02695|1|4e-35|147|pop:POPTR_712066|photosystem I subunit VI	GO:0009570//chloroplast stroma;GO:0009534//chloroplast thylakoid;GO:0009522//photosystem I;GO:0031224//intrinsic to membrane;GO:0009570//chloroplast stroma;GO:0009534//chloroplast thylakoid;GO:0009522//photosystem I	-	GO:0044237//cellular metabolic process;GO:0044237//cellular metabolic process	gi|255634224|gb|ACU17476.1|/9.27671e-54/unknown [Glycine max]
Glyma14g01800	1081	42	123	4.61762	13.5875	1.55706	Up	1.12e-10	5.99e-09	-	-	-	-	gi|356552613|ref|XP_003544659.1|/1.75289e-92/PREDICTED: uncharacterized protein LOC100801579 [Glycine max]
Glyma13g02231	769	125	366	19.3187	56.8351	1.55678	Up	6.89e-29	1.32e-26	-	-	-	-	gi|356548437|ref|XP_003542608.1|/5.87449e-40/PREDICTED: uncharacterized protein LOC100500309 [Glycine max]
Glyma12g36300	875	58	169	7.87797	23.0643	1.54977	Up	4.6e-14	3.49e-12	K15382|1|2e-109|393|gmx:100776187|solute carrier family 50 (sugar transporter)	GO:0016021//integral to membrane	-	GO:0006810//transport	gi|356544144|ref|XP_003540515.1|/2.79676e-108/PREDICTED: bidirectional sugar transporter SWEET2-like [Glycine max]
Glyma18g50080	1758	58	169	3.92106	11.4797	1.54977	Up	4.6e-14	3.49e-12	K13691|1|2e-56|218|mtr:MTR_7g080940|pathogen-inducible salicylic acid glucosyltransferase [EC:2.4.1.-];K13692|2|6e-55|213|vvi:100252177|UDP-glucose:(indol-3-yl)acetate beta-D-glucosyltransferase [EC:2.4.1.121]	-	-	-	gi|356568728|ref|XP_003552562.1|/0/PREDICTED: UDP-glycosyltransferase 83A1-like [Glycine max]
Glyma13g07610	1024	53	154	6.15135	17.959	1.54573	Up	6.74e-13	4.58e-11	K01602|1|2e-103|374|gmx:100500504|ribulose-bisphosphate carboxylase small chain [EC:4.1.1.39]	GO:0009536//plastid	GO:0016491//oxidoreductase activity;GO:0016831//carboxy-lyase activity	GO:0043094;GO:0015977//carbon fixation	gi|351725817|ref|NP_001235314.1|/2.25133e-102/uncharacterized protein LOC100500504 [Glycine max]
Glyma16g07501	1979	21	61	1.26115	3.68083	1.54529	Up	6.79e-06	0.000174323	-	-	-	-	gi|356560563|ref|XP_003548560.1|/0/PREDICTED: NAC domain-containing protein 8-like [Glycine max]
Glyma03g15805	2009	31	90	1.8339	5.34963	1.54452	Up	4.31e-08	1.64e-06	K00423|1|3e-56|218|ath:AT5G21100|L-ascorbate oxidase [EC:1.10.3.3]	-	GO:0046872//metal ion binding;GO:0016682//oxidoreductase activity, acting on diphenols and related substances as donors, oxygen as acceptor	GO:0008152//metabolic process	gi|356504315|ref|XP_003520942.1|/0/PREDICTED: laccase-7-like [Glycine max]
Glyma03g03850	1793	19	55	1.25941	3.66306	1.5403	Up	2.05e-05	0.000471471	K12356|1|2e-92|338|pop:POPTR_563103|coniferyl-alcohol glucosyltransferase [EC:2.4.1.111]	-	GO:0016740//transferase activity	-	gi|358248842|ref|NP_001239949.1|/0/uncharacterized protein LOC100810554 [Glycine max]
Glyma15g14620	1665	39	112	2.78384	8.03277	1.52882	Up	1.27e-09	6.01e-08	K09422|1|2e-74|278|vvi:100248153|myb proto-oncogene protein, plant	GO:0043231//intracellular membrane-bounded organelle;GO:0043231//intracellular membrane-bounded organelle	GO:0003676//nucleic acid binding;GO:0003676//nucleic acid binding	-	gi|356555971|ref|XP_003546301.1|/1.26376e-130/PREDICTED: transcription repressor MYB6 [Glycine max]
Glyma05g32880	858	96	275	13.2978	38.2743	1.52519	Up	1.74e-21	2.22e-19	K14431|1|1e-15|81.6|pop:POPTR_863058|transcription factor TGA	-	-	-	gi|356511199|ref|XP_003524316.1|/4.03909e-152/PREDICTED: transcription factor TGA4-like [Glycine max]
Glyma04g05980	1629	19	54	1.3862	3.95853	1.51383	Up	3.09e-05	0.000680029	K05658|1|3e-107|387|vvi:100262734|ATP-binding cassette, subfamily B (MDR/TAP), member 1;K00924|2|4e-98|357|osa:4337593|[EC:2.7.1.-]	-	GO:0004713//protein tyrosine kinase activity;GO:0032559;GO:0004713//protein tyrosine kinase activity;GO:0032559	GO:0006464//cellular protein modification process;GO:0006464//cellular protein modification process	gi|356509845|ref|XP_003523655.1|/0/PREDICTED: serine/threonine-protein kinase At5g01020-like [Glycine max]
Glyma05g22670	1393	23	65	1.96233	5.57216	1.50567	Up	5.12e-06	0.000134798	K10151|1|6e-52|203|pop:POPTR_804326|cyclin D2;K14505|2|5e-39|160|rcu:RCOM_0811920|cyclin D3, plant	-	-	-	gi|356511976|ref|XP_003524697.1|/3.40349e-174/PREDICTED: cyclin-D1-1-like [Glycine max]
Glyma07g05360	1941	74	208	4.53107	12.7967	1.49785	Up	3.22e-16	2.93e-14	-	-	-	-	gi|356520204|ref|XP_003528754.1|/0/PREDICTED: NAC domain-containing protein 102-like [Glycine max]
Glyma08g21390	1354	63	177	5.52989	15.6105	1.49719	Up	5.22e-14	3.94e-12	K02866|1|1e-12|72.8|osa:4332737|large subunit ribosomal protein L10e	-	-	-	gi|363808074|ref|NP_001242215.1|/1.92389e-131/uncharacterized protein LOC100795218 precursor [Glycine max]
Glyma14g09120	1675	20	56	1.41909	3.99241	1.49229	Up	2.67e-05	0.000595119	-	-	-	-	gi|356552206|ref|XP_003544460.1|/1.92273e-98/PREDICTED: uncharacterized protein LOC100781222 [Glycine max]
Glyma02g42640	1474	44	123	3.54772	9.96481	1.48995	Up	4.25e-10	2.14e-08	-	-	-	-	gi|356499167|ref|XP_003518414.1|/2.81054e-41/PREDICTED: uncharacterized protein LOC100780743 [Glycine max]
Glyma11g09060	1577	123	343	9.26975	25.9731	1.48642	Up	1.73e-25	2.79e-23	K00924|1|2e-121|434|ath:AT4G35600|[EC:2.7.1.-];K05658|4|4e-107|387|vvi:100262734|ATP-binding cassette, subfamily B (MDR/TAP), member 1	-	GO:0004713//protein tyrosine kinase activity;GO:0032559	GO:0006464//cellular protein modification process	gi|356540872|ref|XP_003538908.1|/0/PREDICTED: LOW QUALITY PROTEIN: probable serine/threonine-protein kinase Cx32, chloroplastic-like [Glycine max]
Glyma17g09610	2458	32	89	1.54726	4.32384	1.4826	Up	1.26e-07	4.48e-06	-	-	-	-	gi|356562722|ref|XP_003549618.1|/0/PREDICTED: uncharacterized protein LOC100781639 [Glycine max]
Glyma09g03690	1629	30	83	2.18874	6.08441	1.47502	Up	3.73e-07	1.23e-05	K09422|1|1e-88|325|pop:POPTR_564352|myb proto-oncogene protein, plant	-	-	-	gi|356529079|ref|XP_003533124.1|/2.78908e-154/PREDICTED: uncharacterized protein LOC100805341 [Glycine max]
Glyma02g12020	1157	85	234	8.73132	24.1515	1.46784	Up	1.43e-17	1.48e-15	K01166|1|3e-95|347|ath:AT1G14220|ribonuclease T2 [EC:3.1.27.1]	GO:0044464//cell part	GO:0016892;GO:0003676//nucleic acid binding	-	gi|351722053|ref|NP_001235183.1|/2.40117e-135/uncharacterized protein LOC100306447 precursor [Glycine max]
Glyma18g51250	944	24	66	3.02158	8.34898	1.4663	Up	6.62e-06	0.000170339	K04371|1|1e-14|79.0|vvi:100254083|extracellular signal-regulated kinase 1/2 [EC:2.7.11.24];K09060|2|9e-09|59.3|gmx:778122|plant G-box-binding factor	GO:0043231//intracellular membrane-bounded organelle	GO:0003677//DNA binding;GO:0001071//nucleic acid binding transcription factor activity;GO:0005515//protein binding	GO:0006351//transcription, DNA-dependent	gi|351725655|ref|NP_001237100.1|/4.6268e-83/uncharacterized protein LOC100527256 [Glycine max]
Glyma01g04791	4821	146	401	3.59923	9.93273	1.4645	Up	6.42e-29	1.24e-26	K12813|1|0.0|1576|gmx:100809559|pre-mRNA-splicing factor ATP-dependent RNA helicase DHX16 [EC:3.6.4.13]	GO:0044464//cell part;GO:0044464//cell part;GO:0044464//cell part	GO:0042623//ATPase activity, coupled;GO:0003724//RNA helicase activity;GO:0032559;GO:0042623//ATPase activity, coupled;GO:0003724//RNA helicase activity;GO:0032559;GO:0042623//ATPase activity, coupled;GO:0003724//RNA helicase activity;GO:0032559	GO:0006396//RNA processing;GO:0016441//posttranscriptional gene silencing;GO:0003006//developmental process involved in reproduction;GO:0006396//RNA processing;GO:0016441//posttranscriptional gene silencing;GO:0003006//developmental process involved in reproduction;GO:0006396//RNA processing;GO:0016441//posttranscriptional gene silencing;GO:0003006//developmental process involved in reproduction	gi|356516849|ref|XP_003527105.1|/0/PREDICTED: putative pre-mRNA-splicing factor ATP-dependent RNA helicase DHX16 isoform 1 [Glycine max]
Glyma15g08360	1647	69	189	4.97909	13.7034	1.46058	Up	2.23e-14	1.75e-12	K09286|1|5e-25|114|vvi:100264172|EREBP-like factor;K03021|2|6e-25|114|smo:SELMODRAFT_443461|DNA-directed RNA polymerase III subunit RPC2 [EC:2.7.7.6]	-	-	-	gi|356555350|ref|XP_003545996.1|/2.5314e-86/PREDICTED: ethylene-responsive transcription factor 12-like [Glycine max]
Glyma17g19830	1391	64	175	5.46824	15.0235	1.45808	Up	2.18e-13	1.54e-11	K10863|1|7e-08|57.0|ath:AT5G01310|aprataxin [EC:3.-.-.-]	GO:0043231//intracellular membrane-bounded organelle	GO:0001071//nucleic acid binding transcription factor activity	GO:0048467//gynoecium development;GO:0048449//floral organ formation;GO:0006351//transcription, DNA-dependent	gi|356565592|ref|XP_003551023.1|/9.87854e-57/PREDICTED: transcription factor HEC1-like [Glycine max]
Glyma07g36430	1473	30	82	2.42054	6.64772	1.45753	Up	5.54e-07	1.78e-05	K09422|1|3e-94|343|pop:POPTR_564352|myb proto-oncogene protein, plant	GO:0043231//intracellular membrane-bounded organelle	-	GO:0009725//response to hormone stimulus;GO:0006970//response to osmotic stress;GO:0051707//response to other organism	gi|358248638|ref|NP_001239915.1|/2.62915e-156/uncharacterized protein LOC100791349 [Glycine max]
Glyma04g04355	1650	119	325	8.57151	23.5213	1.45635	Up	1.49e-23	2.17e-21	K09286|1|1e-49|196|rcu:RCOM_1589590|EREBP-like factor	GO:0043231//intracellular membrane-bounded organelle;GO:0043231//intracellular membrane-bounded organelle	GO:0003676//nucleic acid binding;GO:0001071//nucleic acid binding transcription factor activity;GO:0003676//nucleic acid binding;GO:0001071//nucleic acid binding transcription factor activity	GO:0006351//transcription, DNA-dependent;GO:0006351//transcription, DNA-dependent	gi|356510467|ref|XP_003523959.1|/1.64462e-77/PREDICTED: ethylene-responsive transcription factor RAP2-1-like [Glycine max]
Glyma10g39060	965	163	445	20.075	55.0674	1.4558	Up	1.2e-31	2.67e-29	K00676|1|4e-10|63.9|ppp:PHYPADRAFT_104139|ribosomal-protein-alanine N-acetyltransferase [EC:2.3.1.128]	-	GO:0016740//transferase activity	-	gi|351725891|ref|NP_001237364.1|/1.6262e-99/uncharacterized protein LOC100500394 [Glycine max]
Glyma04g14800	2529	376	1025	17.6699	48.399	1.45369	Up	1.56e-70	1.47e-67	K00540|1|1e-142|505|ath:AT3G22370|[EC:1.-.-.-]	GO:0019866//organelle inner membrane;GO:0043231//intracellular membrane-bounded organelle;GO:0031224//intrinsic to membrane	GO:0043169//cation binding;GO:0016682//oxidoreductase activity, acting on diphenols and related substances as donors, oxygen as acceptor	GO:0051234//establishment of localization;GO:0032501//multicellular organismal process;GO:0006950//response to stress;GO:0007165//signal transduction;GO:0015980//energy derivation by oxidation of organic compounds	gi|351720843|ref|NP_001236166.1|/0/ubiquinol oxidase 1, mitochondrial [Glycine max]
Glyma11g09070	1874	134	365	8.49825	23.2587	1.45253	Up	3.66e-26	6.15e-24	K00924|1|5e-117|420|ath:AT4G35600|[EC:2.7.1.-];K05658|4|6e-104|376|vvi:100262734|ATP-binding cassette, subfamily B (MDR/TAP), member 1	-	GO:0004713//protein tyrosine kinase activity;GO:0032559;GO:0004713//protein tyrosine kinase activity;GO:0032559;GO:0004713//protein tyrosine kinase activity;GO:0032559	GO:0006464//cellular protein modification process;GO:0006464//cellular protein modification process;GO:0006464//cellular protein modification process	gi|356540874|ref|XP_003538909.1|/0/PREDICTED: probable serine/threonine-protein kinase Cx32, chloroplastic-like [Glycine max]
Glyma11g31330	1034	130	354	14.9423	40.8831	1.4521	Up	2.07e-25	3.3e-23	K00799|1|7e-73|272|gmx:547936|glutathione S-transferase [EC:2.5.1.18]	-	GO:0016740//transferase activity	-	gi|351725623|ref|NP_001236587.1|/8.38189e-121/uncharacterized protein LOC100527221 [Glycine max]
Glyma19g00570	1828	216	586	14.0434	38.281	1.44674	Up	8.75e-41	2.81e-38	K15402|1|8e-116|416|rcu:RCOM_1376710|cytochrome P450, family 86, subfamily B, polypeptide 1 (fatty acid omega-hydroxylase) [EC:1.14.-.-];K00517|3|2e-112|405|ath:AT5G52320|[EC:1.14.-.-];K15405|4|7e-112|402|aly:ARALYDRAFT_474859|cytochrome P450, family 96, subfamily A, polypeptide 15 (midchain alkane hydroxylase)	-	GO:0046872//metal ion binding;GO:0016491//oxidoreductase activity	-	gi|356573349|ref|XP_003554824.1|/0/PREDICTED: cytochrome P450 86B1-like [Glycine max]
Glyma20g25990	1238	44	119	4.22402	11.4786	1.44225	Up	2.05e-09	9.41e-08	-	-	-	-	gi|356575621|ref|XP_003555937.1|/2.42702e-96/PREDICTED: uncharacterized protein LOC100792170 [Glycine max]
Glyma01g37090	1471	164	443	13.2503	35.9627	1.44048	Up	4.83e-31	1.04e-28	K03686|1|2e-12|72.4|smo:SELMODRAFT_167519|molecular chaperone DnaJ	-	GO:0005515//protein binding	GO:0044267//cellular protein metabolic process	gi|356496637|ref|XP_003517172.1|/2.19517e-78/PREDICTED: chaperone protein dnaJ 11, chloroplastic-like [Glycine max]
Glyma12g36161	3487	30	81	1.0225	2.77392	1.43983	Up	8.21e-07	2.54e-05	K04733|1|3e-44|179|smo:SELMODRAFT_159261|interleukin-1 receptor-associated kinase 4 [EC:2.7.11.1];K13430|4|2e-43|176|vvi:100254113|serine/threonine-protein kinase PBS1 [EC:2.7.11.1]	-	GO:0005488//binding;GO:0004871//signal transducer activity;GO:0004672//protein kinase activity;GO:0005488//binding;GO:0004672//protein kinase activity	GO:0008152//metabolic process	gi|356542336|ref|XP_003539623.1|/0/PREDICTED: probable LRR receptor-like serine/threonine-protein kinase At1g53430-like [Glycine max]
Glyma06g05740	936	42	112	5.33295	14.2891	1.4219	Up	8.83e-09	3.74e-07	K13993|1|4e-62|236|gmx:100777239|HSP20 family protein	-	-	-	gi|351726196|ref|NP_001237886.1|/5.62236e-65/uncharacterized protein LOC100499658 [Glycine max]
Glyma16g23750	1060	27	72	3.02728	8.11126	1.4219	Up	4.19e-06	0.000112458	K03686|1|1e-09|62.4|osa:4331058|molecular chaperone DnaJ;K09510|2|2e-09|61.6|vcn:VOLCADRAFT_57911|DnaJ homolog subfamily B member 4;K09527|3|3e-09|60.8|cre:CHLREDRAFT_146571|DnaJ homolog subfamily C member 7	GO:0043231//intracellular membrane-bounded organelle	-	GO:0050896//response to stimulus	gi|356559290|ref|XP_003547933.1|/3.66918e-87/PREDICTED: chaperone protein dnaJ 11, chloroplastic-like [Glycine max]
Glyma14g00640	1302	38	101	3.4687	9.26343	1.41715	Up	5.15e-08	1.94e-06	K08909|1|4e-114|409|pop:POPTR_664934|light-harvesting complex I chlorophyll a/b binding protein 3	GO:0009521;GO:0031224//intrinsic to membrane;GO:0009534//chloroplast thylakoid	GO:0046906//tetrapyrrole binding;GO:0043169//cation binding	GO:0006464//cellular protein modification process;GO:0006091//generation of precursor metabolites and energy	gi|356554088|ref|XP_003545381.1|/1.89618e-131/PREDICTED: chlorophyll a-b binding protein 3, chloroplastic-like isoform 1 [Glycine max]
Glyma02g06020	1895	78	207	4.89192	13.0444	1.41495	Up	5.95e-15	4.84e-13	K13120|1|1e-129|461|vvi:100263357|protein FAM32A;K08900|2|3e-124|444|pop:POPTR_563200|mitochondrial chaperone BCS1	GO:0043231//intracellular membrane-bounded organelle	GO:0017111//nucleoside-triphosphatase activity;GO:0032559	-	gi|356502980|ref|XP_003520292.1|/0/PREDICTED: ATP-dependent zinc metalloprotease FtsH 1-like [Glycine max]
Glyma15g07080	3427	54	143	1.87273	4.98292	1.41185	Up	9.79e-11	5.31e-09	K00924|1|2e-23|110|aly:ARALYDRAFT_313416|[EC:2.7.1.-];K04733|3|3e-20|99.4|smo:SELMODRAFT_159261|interleukin-1 receptor-associated kinase 4 [EC:2.7.11.1];K13416|5|9e-20|97.8|rcu:RCOM_1534760|brassinosteroid insensitive 1-associated receptor kinase 1 [EC:2.7.10.1 2.7.11.1]	GO:0043231//intracellular membrane-bounded organelle;GO:0016020//membrane;GO:0043231//intracellular membrane-bounded organelle;GO:0016020//membrane	GO:0019899//enzyme binding;GO:0004674//protein serine/threonine kinase activity;GO:0000166//nucleotide binding;GO:0019899//enzyme binding;GO:0004674//protein serine/threonine kinase activity;GO:0000166//nucleotide binding	GO:0009987//cellular process;GO:0009987//cellular process	gi|356546692|ref|XP_003541757.1|/0/PREDICTED: receptor-like serine/threonine-protein kinase SD1-8-like [Glycine max]
Glyma10g33810	1736	325	860	22.2499	59.1576	1.41076	Up	6.41e-57	3.85e-54	K09286|1|6e-26|117|aly:ARALYDRAFT_494253|EREBP-like factor	-	-	-	gi|351724063|ref|NP_001235253.1|/3.40013e-105/uncharacterized protein LOC100499732 [Glycine max]
Glyma15g42500	1343	80	211	7.07959	18.7615	1.40604	Up	4.41e-15	3.63e-13	-	-	-	-	gi|357457489|ref|XP_003599025.1|/3.3847e-14/Siroheme synthase [Medicago truncatula]
Glyma18g07800	499	44	116	10.4796	27.76	1.40542	Up	6.51e-09	2.81e-07	-	-	-	-	gi|357460427|ref|XP_003600495.1|/1.03915e-16/hypothetical protein MTR_3g061880 [Medicago truncatula]
Glyma15g05520	1628	33	87	2.4091	6.38155	1.40542	Up	5.19e-07	1.67e-05	-	-	-	-	gi|356557527|ref|XP_003547067.1|/0/PREDICTED: auxin-induced protein 5NG4-like [Glycine max]
Glyma06g01850	1832	49	129	3.17881	8.40864	1.40338	Up	9.63e-10	4.63e-08	K05298|1|0.0|795|gmx:732571|glyceraldehyde-3-phosphate dehydrogenase (NADP+) (phosphorylating) [EC:1.2.1.13]	GO:0009536//plastid;GO:0009536//plastid;GO:0009536//plastid	GO:0000166//nucleotide binding;GO:0000166//nucleotide binding;GO:0000166//nucleotide binding	GO:0015977//carbon fixation;GO:0019318//hexose metabolic process;GO:0015977//carbon fixation;GO:0019318//hexose metabolic process;GO:0015977//carbon fixation;GO:0019318//hexose metabolic process	gi|255641007|gb|ACU20783.1|/0/unknown [Glycine max]
Glyma16g01430	1068	56	147	6.23177	16.4364	1.39918	Up	7.22e-11	3.97e-09	-	-	-	-	gi|356559130|ref|XP_003547854.1|/1.68825e-47/PREDICTED: uncharacterized protein LOC100797158 [Glycine max]
Glyma18g42580	2129	24	63	1.33977	3.53367	1.39918	Up	2.15e-05	0.000492366	K13508|1|0.0|1022|gmx:100808918|glycerol-3-phosphate acyltransferase [EC:2.3.1.15]	GO:0044464//cell part	GO:0016411//acylglycerol O-acyltransferase activity	GO:0006633//fatty acid biosynthetic process;GO:0009791//post-embryonic development	gi|356568058|ref|XP_003552230.1|/0/PREDICTED: glycerol-3-phosphate acyltransferase 6-like [Glycine max]
Glyma06g20730	1616	257	673	18.9011	49.7319	1.39571	Up	3.19e-44	1.28e-41	K00799|1|5e-54|210|mtr:MTR_5g040430|glutathione S-transferase [EC:2.5.1.18]	-	GO:0016765//transferase activity, transferring alkyl or aryl (other than methyl) groups;GO:0016829//lyase activity	-	gi|351727779|ref|NP_001238708.1|/6.61993e-132/glutathione S-transferase GST 12 [Glycine max]
Glyma11g35050	1843	476	1238	30.6956	80.2152	1.38584	Up	4.92e-79	6.08e-76	-	-	-	-	gi|351723487|ref|NP_001235233.1|/0/uncharacterized protein LOC547603 [Glycine max]
Glyma02g38580	1477	34	88	2.73585	7.11482	1.37884	Up	6.5e-07	2.05e-05	-	GO:0016020//membrane	-	-	gi|356498908|ref|XP_003518289.1|/6.52391e-139/PREDICTED: uncharacterized protein LOC100790696 [Glycine max]
Glyma09g01240	1569	26	67	1.96945	5.09933	1.37252	Up	1.56e-05	0.000371555	-	-	-	-	gi|356532337|ref|XP_003534730.1|/2.87423e-132/PREDICTED: uncharacterized protein LOC100811764 [Glycine max]
Glyma16g03960	714	84	215	13.9822	35.9585	1.36274	Up	1.07e-14	8.53e-13	-	-	-	-	gi|356560801|ref|XP_003548675.1|/2.08599e-49/PREDICTED: uncharacterized protein LOC100809764 [Glycine max]
Glyma19g01780	2135	374	955	20.8194	53.4155	1.35933	Up	1.2e-59	8.1e-57	K00517|1|1e-130|465|ath:AT4G31940|[EC:1.14.-.-];K05280|2|3e-90|331|pop:POPTR_823742|flavonoid 3'-monooxygenase [EC:1.14.13.21]	GO:0044464//cell part	GO:0016491//oxidoreductase activity;GO:0005506//iron ion binding	GO:0008152//metabolic process	gi|356571829|ref|XP_003554074.1|/0/PREDICTED: cytochrome P450 82A3-like [Glycine max]
Glyma17g07530	3539	71	181	2.38436	6.10744	1.35697	Up	1.58e-12	1.04e-10	K16055|1|0.0|1543|gmx:100810498|trehalose 6-phosphate synthase/phosphatase [EC:2.4.1.15 3.1.3.12]	-	GO:0019203//carbohydrate phosphatase activity;GO:0035251//UDP-glucosyltransferase activity;GO:0019203//carbohydrate phosphatase activity;GO:0035251//UDP-glucosyltransferase activity	GO:0005991//trehalose metabolic process;GO:0005991//trehalose metabolic process	gi|356562495|ref|XP_003549506.1|/0/PREDICTED: probable alpha,alpha-trehalose-phosphate synthase [UDP-forming] 11-like [Glycine max]
Glyma18g01340	769	117	298	18.0823	46.2755	1.35567	Up	1.18e-19	1.35e-17	-	-	-	-	gi|356567336|ref|XP_003551877.1|/3.52914e-45/PREDICTED: uncharacterized protein LOC100500344 [Glycine max]
Glyma15g18860	2422	48	122	2.35538	6.01516	1.35264	Up	7.4e-09	3.17e-07	K04368|1|1e-113|409|rcu:RCOM_1046440|mitogen-activated protein kinase kinase 1 [EC:2.7.12.2]	-	GO:0004672//protein kinase activity;GO:0032559;GO:0004672//protein kinase activity;GO:0032559;GO:0004672//protein kinase activity;GO:0032559	GO:0006464//cellular protein modification process;GO:0006464//cellular protein modification process;GO:0006464//cellular protein modification process	gi|356556312|ref|XP_003546470.1|/0/PREDICTED: mitogen-activated protein kinase kinase 2-like [Glycine max]
Glyma14g20450	1450	32	81	2.62287	6.67081	1.34672	Up	2.78e-06	7.75e-05	-	-	-	-	gi|255639828|gb|ACU20207.1|/1.77227e-173/unknown [Glycine max]
Glyma10g33060	1592	32	81	2.38892	6.0758	1.34672	Up	2.78e-06	7.74e-05	K14516|1|1e-44|179|rcu:RCOM_1007740|ethylene-responsive transcription factor 1	-	GO:0003676//nucleic acid binding	GO:0000160//two-component signal transduction system (phosphorelay);GO:0006351//transcription, DNA-dependent;GO:0006950//response to stress	gi|356535422|ref|XP_003536244.1|/3.37994e-80/PREDICTED: ethylene-responsive transcription factor 1B-like [Glycine max]
Glyma04g14790	2860	132	334	5.48532	13.9458	1.34618	Up	1.26e-21	1.63e-19	-	GO:0031224//intrinsic to membrane	GO:0015081//sodium ion transmembrane transporter activity	GO:0030001//metal ion transport;GO:0009267//cellular response to starvation	gi|356510355|ref|XP_003523904.1|/0/PREDICTED: probable urea active transporter 1-like [Glycine max]
Glyma09g15820	1151	27	68	2.78794	7.05497	1.33944	Up	1.94e-05	0.000448368	K12900|1|2e-21|101|rcu:RCOM_0036490|FUS-interacting serine-arginine-rich protein 1	-	GO:0005488//binding;GO:0005488//binding;GO:0005488//binding	-	gi|358248974|ref|NP_001239716.1|/9.82653e-22/uncharacterized protein LOC100816913 [Glycine max]
Glyma01g31300	1226	31	78	3.00515	7.59741	1.33807	Up	4.75e-06	0.00012597	K00522|1|3e-95|347|mtr:MTR_4g014540|ferritin heavy chain [EC:1.16.3.1]	GO:0009536//plastid	GO:0016724;GO:0005506//iron ion binding	GO:0008152//metabolic process;GO:0000041//transition metal ion transport;GO:0006875//cellular metal ion homeostasis	gi|351723759|ref|NP_001237034.1|/1.64569e-121/ferritin-2, chloroplastic [Glycine max]
Glyma05g37420	1386	259	650	22.2091	56.003	1.33435	Up	4.83e-40	1.49e-37	-	-	-	-	gi|356513345|ref|XP_003525374.1|/9.84237e-49/PREDICTED: uncharacterized protein LOC100784242 [Glycine max]
Glyma19g16680	2213	61	153	3.27599	8.25604	1.33352	Up	1.47e-10	7.73e-09	-	-	GO:0003824//catalytic activity	-	gi|356571350|ref|XP_003553841.1|/0/PREDICTED: putative aminoacrylate hydrolase RutD-like [Glycine max]
Glyma07g01040	1983	32	80	1.91788	4.81758	1.3288	Up	4.03e-06	0.0001085	-	-	-	-	gi|356522180|ref|XP_003529725.1|/0/PREDICTED: uncharacterized protein LOC100784093 [Glycine max]
Glyma15g18150	1044	48	120	5.46431	13.7259	1.3288	Up	1.55e-08	6.34e-07	-	-	-	-	gi|356556248|ref|XP_003546438.1|/9.27452e-35/PREDICTED: uncharacterized protein LOC100817592 [Glycine max]
Glyma07g05490	1398	26	65	2.21035	5.55223	1.3288	Up	3.33e-05	0.000726128	-	GO:0009526//plastid envelope;GO:0009534//chloroplast thylakoid;GO:0009522//photosystem I;GO:0000229;GO:0009526//plastid envelope;GO:0009534//chloroplast thylakoid;GO:0009522//photosystem I;GO:0000229	-	GO:0009725//response to hormone stimulus;GO:0009767//photosynthetic electron transport chain;GO:0009725//response to hormone stimulus;GO:0009767//photosynthetic electron transport chain	gi|356559599|ref|XP_003548086.1|/2.28558e-65/PREDICTED: thylakoid membrane phosphoprotein 14 kDa, chloroplastic-like [Glycine max]
Glyma09g22306	1061	138	345	15.4582	38.8298	1.3288	Up	7.06e-22	9.35e-20	-	-	-	-	gi|358248574|ref|NP_001240160.1|/1.50751e-106/uncharacterized protein LOC100799842 [Glycine max]
Glyma13g18410	1547	313	782	24.0463	60.364	1.32787	Up	1.74e-47	8.04e-45	K14516|1|1e-34|145|vvi:100246426|ethylene-responsive transcription factor 1	-	-	-	gi|359806593|ref|NP_001241014.1|/2.58911e-85/uncharacterized protein LOC100784784 [Glycine max]
Glyma13g21925	1682	83	207	5.86471	14.6962	1.32531	Up	1.13e-13	8.3e-12	K09833|1|2e-112|404|gmx:100819685|homogenitisate phytyltransferase	-	GO:0016740//transferase activity;GO:0016740//transferase activity	-	gi|356548403|ref|XP_003542591.1|/0/PREDICTED: probable homogentisate phytyltransferase 1, chloroplastic-like [Glycine max]
Glyma01g45260	691	43	107	7.39579	18.4913	1.32207	Up	1.05e-07	3.78e-06	-	-	-	-	-
Glyma12g06406	2119	31	77	1.7387	4.33932	1.31946	Up	6.89e-06	0.000176751	K14491|1|5e-21|101|osa:4331008|two-component response regulator ARR-B family	-	-	GO:0006351//transcription, DNA-dependent;GO:0048511//rhythmic process;GO:0006351//transcription, DNA-dependent;GO:0048511//rhythmic process;GO:0006351//transcription, DNA-dependent;GO:0048511//rhythmic process	gi|356542300|ref|XP_003539607.1|/2.91244e-135/PREDICTED: putative two-component response regulator ARR21-like isoform 1 [Glycine max]
Glyma12g31900	1206	44	109	4.3361	10.793	1.31562	Up	8.93e-08	3.23e-06	K14009|1|8e-71|265|gmx:100798727|B-cell receptor-associated protein 31	GO:0031090//organelle membrane;GO:0043231//intracellular membrane-bounded organelle	-	-	gi|356543692|ref|XP_003540294.1|/1.5615e-100/PREDICTED: uncharacterized protein LOC100790767 [Glycine max]
Glyma08g28220	934	65	161	8.27105	20.5845	1.31542	Up	7.7e-11	4.23e-09	K04371|1|2e-15|81.6|vvi:100254083|extracellular signal-regulated kinase 1/2 [EC:2.7.11.24];K09060|2|1e-09|62.0|rcu:RCOM_0553250|plant G-box-binding factor	GO:0043231//intracellular membrane-bounded organelle	GO:0003677//DNA binding;GO:0001071//nucleic acid binding transcription factor activity;GO:0005515//protein binding	GO:0006351//transcription, DNA-dependent	gi|351722803|ref|NP_001235209.1|/2.24791e-82/uncharacterized protein LOC100500497 [Glycine max]
Glyma07g14750	1710	36	89	2.50208	6.2152	1.31268	Up	1.44e-06	4.24e-05	-	-	GO:0001071//nucleic acid binding transcription factor activity	GO:0009314//response to radiation;GO:0010467//gene expression	gi|356523088|ref|XP_003530174.1|/1.14248e-113/PREDICTED: GATA transcription factor 2-like [Glycine max]
Glyma05g35220	1428	58	143	4.82719	11.9583	1.30876	Up	1.02e-09	4.9e-08	K01056|1|2e-137|487|gmx:100526866|peptidyl-tRNA hydrolase, PTH1 family [EC:3.1.1.29]	GO:0009536//plastid	GO:0004091//carboxylesterase activity	GO:0010467//gene expression	gi|356513117|ref|XP_003525260.1|/2.88855e-136/PREDICTED: peptidyl-tRNA hydrolase, chloroplastic [Glycine max]
Glyma12g16750	2234	103	253	5.47959	13.5238	1.30336	Up	5.23e-16	4.65e-14	K14494|1|9e-61|233|pop:POPTR_645273|DELLA protein	-	-	-	gi|356545173|ref|XP_003541019.1|/0/PREDICTED: chitin-inducible gibberellin-responsive protein 1-like [Glycine max]
Glyma08g05500	1292	86	211	7.91098	19.5021	1.3017	Up	1.44e-13	1.05e-11	K05933|1|1e-136|484|gmx:100784455|aminocyclopropanecarboxylate oxidase [EC:1.14.17.4]	-	GO:0043169//cation binding;GO:0019842//vitamin binding;GO:0016641//oxidoreductase activity, acting on the CH-NH2 group of donors, oxygen as acceptor	GO:0003006//developmental process involved in reproduction;GO:0009692	gi|356527874|ref|XP_003532531.1|/9.18933e-179/PREDICTED: 1-aminocyclopropane-1-carboxylate oxidase-like [Glycine max]
Glyma13g02860	1326	82	201	7.34962	18.1015	1.30037	Up	5.63e-13	3.85e-11	K09286|1|9e-13|73.2|vvi:100252531|EREBP-like factor	GO:0043231//intracellular membrane-bounded organelle	GO:0001071//nucleic acid binding transcription factor activity	GO:0006351//transcription, DNA-dependent	gi|359806170|ref|NP_001241199.1|/1.56345e-80/ethylene-responsive transcription factor ERF012-like [Glycine max]
Glyma16g26130	1173	60	147	6.07922	14.9651	1.29965	Up	7.38e-10	3.6e-08	K08907|1|2e-115|414|rcu:RCOM_0333020|light-harvesting complex I chlorophyll a/b binding protein 1	GO:0009521;GO:0031224//intrinsic to membrane;GO:0009534//chloroplast thylakoid	GO:0046906//tetrapyrrole binding;GO:0043169//cation binding	GO:0006464//cellular protein modification process;GO:0006091//generation of precursor metabolites and energy	gi|356559472|ref|XP_003548023.1|/7.62658e-129/PREDICTED: chlorophyll a-b binding protein 6A, chloroplastic-like [Glycine max]
Glyma02g41300	1584	40	98	3.00123	7.38809	1.29965	Up	5.16e-07	1.66e-05	K13448|1|1e-47|189|pop:POPTR_711309|calcium-binding protein CML	-	GO:0046872//metal ion binding;GO:0016491//oxidoreductase activity	-	gi|356501039|ref|XP_003519336.1|/5.01277e-76/PREDICTED: probable calcium-binding protein CML27-like [Glycine max]
Glyma17g13690	809	54	132	7.93304	19.4844	1.29637	Up	5.82e-09	2.54e-07	-	-	-	-	gi|356563176|ref|XP_003549840.1|/3.63664e-19/PREDICTED: uncharacterized protein LOC100812292 [Glycine max]
Glyma13g33300	1450	682	1666	55.8999	137.205	1.29541	Up	1.75e-95	3.02e-92	K04125|1|9e-145|511|pop:POPTR_550316|gibberellin 2-oxidase [EC:1.14.11.13]	-	GO:0046914//transition metal ion binding;GO:0016706//oxidoreductase activity, acting on paired donors, with incorporation or reduction of molecular oxygen, 2-oxoglutarate as one donor, and incorporation of one atom each of oxygen into both donors;GO:0016701//oxidoreductase activity, acting on single donors with incorporation of molecular oxygen	GO:0008152//metabolic process	gi|356549549|ref|XP_003543155.1|/0/PREDICTED: gibberellin 2-beta-dioxygenase 1-like [Glycine max]
Glyma10g05210	1185	61	149	6.11795	15.0151	1.2953	Up	6.27e-10	3.08e-08	-	-	-	-	gi|356537375|ref|XP_003537203.1|/6.42258e-83/PREDICTED: zinc finger protein ZAT11-like [Glycine max]
Glyma03g01190	1401	102	249	8.6528	21.2238	1.29444	Up	1.26e-15	1.09e-13	K05282|1|4e-34|144|aly:ARALYDRAFT_492287|gibberellin 20-oxidase [EC:1.14.11.12]	-	GO:0016701//oxidoreductase activity, acting on single donors with incorporation of molecular oxygen;GO:0016706//oxidoreductase activity, acting on paired donors, with incorporation or reduction of molecular oxygen, 2-oxoglutarate as one donor, and incorporation of one atom each of oxygen into both donors	GO:0008152//metabolic process	gi|356506224|ref|XP_003521887.1|/2.1445e-176/PREDICTED: gibberellin 3-beta-dioxygenase 4-like [Glycine max]
Glyma13g04670	2067	686	1673	39.4437	96.6534	1.29302	Up	1.31e-95	2.37e-92	K00517|1|2e-133|474|ath:AT4G31940|[EC:1.14.-.-];K05280|2|9e-88|323|pop:POPTR_823742|flavonoid 3'-monooxygenase [EC:1.14.13.21]	GO:0044464//cell part	GO:0016491//oxidoreductase activity;GO:0005506//iron ion binding	GO:0008152//metabolic process	gi|359806338|ref|NP_001240972.1|/0/cytochrome P450 82A3 [Glycine max]
Glyma12g04300	1114	294	713	31.3658	76.4304	1.28495	Up	2.24e-41	7.35e-39	-	-	-	-	gi|358248365|ref|NP_001240125.1|/2.4137e-68/uncharacterized protein LOC100804188 [Glycine max]
Glyma01g36190	2188	64	155	3.47638	8.45952	1.28299	Up	3.83e-10	1.94e-08	K07088|1|0.0|697|gmx:100792072|	GO:0044464//cell part;GO:0044464//cell part	-	GO:0060918//auxin transport;GO:0060918//auxin transport	gi|356496547|ref|XP_003517128.1|/0/PREDICTED: uncharacterized transporter YBR287W-like isoform 2 [Glycine max]
Glyma16g01940	2034	162	392	9.46582	23.0142	1.28173	Up	2.15e-23	3.06e-21	-	-	-	-	gi|356560211|ref|XP_003548387.1|/2.7884e-170/PREDICTED: NAC domain-containing protein 69-like [Glycine max]
Glyma02g06640	1325	76	183	6.81698	16.4929	1.27464	Up	1.28e-11	7.65e-10	K13648|1|5e-14|77.4|sbi:SORBI_05g022970|alpha-1,4-galacturonosyltransferase [EC:2.4.1.43]	-	GO:0016740//transferase activity	-	gi|356502195|ref|XP_003519906.1|/0/PREDICTED: probable galacturonosyltransferase-like 2-like [Glycine max]
Glyma06g21920	1895	35	84	2.19509	5.29336	1.2699	Up	5.07e-06	0.000133784	K05280|1|0.0|889|gmx:547475|flavonoid 3'-monooxygenase [EC:1.14.13.21]	-	GO:0016491//oxidoreductase activity;GO:0005506//iron ion binding	GO:0008152//metabolic process	gi|351723209|ref|NP_001237015.1|/0/flavonoid 3'-hydroxylase [Glycine max]
Glyma20g24600	1529	35	84	2.72054	6.56045	1.2699	Up	5.07e-06	0.000133703	-	GO:0043231//intracellular membrane-bounded organelle	GO:0003676//nucleic acid binding;GO:0001071//nucleic acid binding transcription factor activity	GO:0006351//transcription, DNA-dependent	gi|351725743|ref|NP_001237103.1|/2.86931e-137/syringolide-induced protein 1-3-1B [Glycine max]
Glyma13g10791	1467	78	187	6.31915	15.222	1.26836	Up	9.17e-12	5.58e-10	K14709|1|3e-153|540|gmx:100789557|solute carrier family 39 (zinc transporter), member 1/2/3	GO:0016020//membrane	GO:0046873//metal ion transmembrane transporter activity	GO:0006829//zinc ion transport	gi|356547541|ref|XP_003542170.1|/3.89619e-152/PREDICTED: zinc transporter 5-like [Glycine max]
Glyma06g11700	1819	167	400	10.9113	26.2596	1.26702	Up	1.92e-23	2.75e-21	K09286|1|2e-14|79.3|vvi:100252531|EREBP-like factor	-	-	GO:0006351//transcription, DNA-dependent	gi|358248764|ref|NP_001239936.1|/2.76156e-89/ethylene-responsive transcription factor ERF012-like [Glycine max]
Glyma17g33100	2165	81	194	4.44653	10.7005	1.26693	Up	3.92e-12	2.51e-10	-	GO:0016020//membrane	-	-	gi|356562093|ref|XP_003549308.1|/4.82233e-160/PREDICTED: uncharacterized protein LOC100819926 [Glycine max]
Glyma08g21410	1285	1767	4227	163.429	392.817	1.2652	Up	1.1e-230	4.77e-226	K02866|1|2e-10|65.1|osa:4332737|large subunit ribosomal protein L10e	-	GO:0016791//phosphatase activity;GO:0016791//phosphatase activity	-	gi|359806656|ref|NP_001241536.1|/2.38313e-140/stem 31 kDa glycoprotein precursor [Glycine max]
Glyma08g06040	4462	627	1498	16.7006	40.0907	1.26337	Up	8.03e-83	1.16e-79	K12236|1|0.0|1576|pop:POPTR_569357|transcriptional repressor NF-X1 [EC:6.3.2.-]	GO:0043231//intracellular membrane-bounded organelle	GO:0046914//transition metal ion binding;GO:0001071//nucleic acid binding transcription factor activity;GO:0046873//metal ion transmembrane transporter activity	GO:0006952//defense response;GO:0009416//response to light stimulus;GO:0009636//response to toxic substance;GO:0009696//salicylic acid metabolic process;GO:0006970//response to osmotic stress;GO:0042743//hydrogen peroxide metabolic process;GO:0006351//transcription, DNA-dependent;GO:0034220//ion transmembrane transport;GO:0030001//metal ion transport	gi|356527906|ref|XP_003532547.1|/0/PREDICTED: NF-X1-type zinc finger protein NFXL1-like [Glycine max]
Glyma04g08020	852	54	129	7.53266	18.0806	1.26321	Up	1.7e-08	6.91e-07	-	-	-	-	gi|356507827|ref|XP_003522665.1|/2.57128e-34/PREDICTED: uncharacterized protein LOC100787739 [Glycine max]
Glyma14g39320	1389	85	202	7.27296	17.3664	1.25569	Up	2.02e-12	1.33e-10	-	-	-	-	-
Glyma07g03860	1735	112	266	7.67208	18.3081	1.25479	Up	7.02e-16	6.2e-14	-	-	-	-	gi|356519433|ref|XP_003528377.1|/0/PREDICTED: F-box/kelch-repeat protein At1g80440-like [Glycine max]
Glyma04g38560	1618	435	1024	31.9525	75.5758	1.242	Up	1e-55	5.87e-53	-	-	-	-	gi|356508929|ref|XP_003523205.1|/2.03414e-173/PREDICTED: NAC domain-containing protein 2-like [Glycine max]
Glyma12g13920	1060	130	306	14.5758	34.4728	1.24189	Up	8.88e-18	9.24e-16	K03676|1|1e-13|75.9|bdi:100821530|glutaredoxin 3	-	GO:0005488//binding;GO:0015036//disulfide oxidoreductase activity	GO:0007165//signal transduction;GO:0010033//response to organic substance;GO:0019725//cellular homeostasis	gi|351727693|ref|NP_001235378.1|/9.96898e-93/uncharacterized protein LOC100306716 [Glycine max]
Glyma07g15480	1745	513	1205	34.9395	82.4619	1.23887	Up	5.21e-65	3.89e-62	K05933|1|9e-179|625|gmx:100785514|aminocyclopropanecarboxylate oxidase [EC:1.14.17.4]	GO:0043231//intracellular membrane-bounded organelle;GO:0044444//cytoplasmic part;GO:0005576//extracellular region;GO:0016020//membrane;GO:0043231//intracellular membrane-bounded organelle;GO:0044444//cytoplasmic part;GO:0005576//extracellular region;GO:0016020//membrane	GO:0003729//mRNA binding;GO:0046914//transition metal ion binding;GO:0016641//oxidoreductase activity, acting on the CH-NH2 group of donors, oxygen as acceptor;GO:0016836//hydro-lyase activity;GO:0003729//mRNA binding;GO:0046914//transition metal ion binding;GO:0016641//oxidoreductase activity, acting on the CH-NH2 group of donors, oxygen as acceptor;GO:0016836//hydro-lyase activity	GO:0010039//response to iron ion;GO:0009692;GO:0006970//response to osmotic stress;GO:0072350//tricarboxylic acid metabolic process;GO:0010039//response to iron ion;GO:0009692;GO:0006970//response to osmotic stress;GO:0072350//tricarboxylic acid metabolic process	gi|356520867|ref|XP_003529081.1|/7.9853e-178/PREDICTED: 1-aminocyclopropane-1-carboxylate oxidase 1-like [Glycine max]
Glyma13g42530	2061	105	245	6.05488	14.1955	1.22926	Up	2.54e-14	1.97e-12	K01193|1|0.0|1164|gmx:100783003|beta-fructofuranosidase [EC:3.2.1.26]	-	GO:0004558//alpha-glucosidase activity	GO:0044238//primary metabolic process	gi|356550430|ref|XP_003543590.1|/0/PREDICTED: beta-fructofuranosidase, cell wall isozyme-like isoform 1 [Glycine max]
Glyma18g09951	960	51	119	6.31384	14.8026	1.22926	Up	1.15e-07	4.11e-06	K13457|1|3e-14|51.2|vvi:100252764|disease resistance protein RPM1	-	GO:0032559	GO:0012501//programmed cell death;GO:0006950//response to stress	gi|356569704|ref|XP_003553036.1|/1.82665e-137/PREDICTED: disease resistance protein RPM1-like, partial [Glycine max]
Glyma10g38910	1023	42	98	4.87942	11.4396	1.22926	Up	1.53e-06	4.49e-05	-	GO:0016020//membrane;GO:0009507//chloroplast	-	-	gi|351724919|ref|NP_001237842.1|/1.06734e-74/uncharacterized protein LOC100306375 [Glycine max]
Glyma04g08390	1359	60	140	5.24718	12.3018	1.22926	Up	8.78e-09	3.73e-07	-	-	-	-	gi|356507865|ref|XP_003522683.1|/4.7307e-64/PREDICTED: uncharacterized protein LOC100798503 [Glycine max]
Glyma10g42450	1443	63	147	5.18882	12.165	1.22926	Up	3.73e-09	1.67e-07	-	GO:0043231//intracellular membrane-bounded organelle	GO:0003676//nucleic acid binding;GO:0001071//nucleic acid binding transcription factor activity	GO:0006351//transcription, DNA-dependent	gi|351725775|ref|NP_001237360.1|/1.28062e-123/syringolide-induced protein 1-3-1A [Glycine max]
Glyma08g21130	2076	127	296	7.27061	17.0265	1.22764	Up	5.79e-17	5.63e-15	K10863|1|7e-15|80.9|ath:AT5G01310|aprataxin [EC:3.-.-.-];K12126|3|1e-08|60.5|aly:ARALYDRAFT_471048|phytochrome-interacting factor 3;K13422|5|2e-07|56.2|mtr:MTR_8g067280|transcription factor MYC2	GO:0043231//intracellular membrane-bounded organelle	-	-	gi|356528881|ref|XP_003533026.1|/0/PREDICTED: transcription factor bHLH87-like [Glycine max]
Glyma08g44670	1428	37	86	3.07941	7.1917	1.22368	Up	7.32e-06	0.000186575	-	-	-	-	gi|356524397|ref|XP_003530815.1|/9.54919e-156/PREDICTED: uncharacterized protein LOC100794512 [Glycine max]
Glyma03g36010	1354	482	1115	42.308	98.3372	1.21681	Up	1.18e-58	7.63e-56	-	-	-	-	gi|356503848|ref|XP_003520714.1|/5.17811e-87/PREDICTED: uncharacterized protein LOC100807520 [Glycine max]
Glyma13g04630	1056	262	603	29.4871	68.1891	1.20946	Up	3.29e-32	7.46e-30	-	-	GO:0046914//transition metal ion binding	GO:0009743//response to carbohydrate stimulus;GO:0009725//response to hormone stimulus	gi|351721581|ref|NP_001237214.1|/5.28697e-104/uncharacterized protein LOC100500384 [Glycine max]
Glyma06g20370	3270	133	306	4.83391	11.1747	1.20897	Up	4.18e-17	4.16e-15	K05643|1|5e-61|234|ppp:PHYPADRAFT_221752|ATP-binding cassette, subfamily A (ABC1), member 3;K05641|5|2e-56|219|ota:Ot18g01460|ATP-binding cassette, subfamily A (ABC1), member 1	-	GO:0042626//ATPase activity, coupled to transmembrane movement of substances;GO:0032559	GO:0009207	gi|356508588|ref|XP_003523037.1|/0/PREDICTED: ABC transporter A family member 7-like [Glycine max]
Glyma18g42730	2679	47	108	2.08506	4.81407	1.20717	Up	6.47e-07	2.04e-05	K08286|1|9e-82|303|aly:ARALYDRAFT_491919|protein-serine/threonine kinase [EC:2.7.11.-];K13415|3|2e-80|299|sbi:SORBI_03g012040|protein brassinosteroid insensitive 1 [EC:2.7.10.1 2.7.11.1]	-	-	-	gi|356566656|ref|XP_003551546.1|/0/PREDICTED: probable LRR receptor-like serine/threonine-protein kinase At4g08850-like [Glycine max]
Glyma19g05140	3801	238	545	7.44172	17.1222	1.20216	Up	5.27e-29	1.02e-26	K01537|1|0.0|1265|aly:ARALYDRAFT_898774|Ca2+-transporting ATPase [EC:3.6.3.8]	GO:0031224//intrinsic to membrane	GO:0046873//metal ion transmembrane transporter activity;GO:0019829//cation-transporting ATPase activity;GO:0032559	GO:0009206;GO:0006816//calcium ion transport	gi|356573611|ref|XP_003554951.1|/0/PREDICTED: putative calcium-transporting ATPase 13, plasma membrane-type-like [Glycine max]
Glyma17g01740	1581	42	96	3.15727	7.25105	1.19951	Up	3.07e-06	8.45e-05	K13412|1|4e-08|58.2|gmx:100812843|calcium-dependent protein kinase [EC:2.7.11.1]	-	-	-	gi|356564500|ref|XP_003550491.1|/6.93015e-110/PREDICTED: uncharacterized protein LOC100813375 [Glycine max]
Glyma06g07130	1340	72	164	6.3859	14.6151	1.19449	Up	1.13e-09	5.38e-08	K14484|1|2e-19|95.1|ath:AT5G25890|auxin-responsive protein IAA	-	-	-	gi|356515402|ref|XP_003526389.1|/1.68466e-123/PREDICTED: LOW QUALITY PROTEIN: auxin-responsive protein IAA29-like [Glycine max]
Glyma14g22970	1576	76	173	5.73128	13.1085	1.19357	Up	4.07e-10	2.05e-08	K09286|1|2e-11|68.9|aly:ARALYDRAFT_912628|EREBP-like factor	-	-	-	gi|358248420|ref|NP_001239623.1|/2.49188e-75/ethylene-responsive transcription factor ERF012-like [Glycine max]
Glyma06g11890	1291	33	75	3.03796	6.9374	1.19129	Up	4.19e-05	0.000885936	K03542|1|3e-68|257|rcu:RCOM_1030930|photosystem II 22kDa protein	GO:0034357;GO:0009507//chloroplast;GO:0044425//membrane part	-	-	gi|356515892|ref|XP_003526631.1|/1.6117e-82/PREDICTED: photosystem II 22 kDa protein, chloroplastic-like [Glycine max]
Glyma02g04930	1867	38	86	2.41899	5.50067	1.1852	Up	1.23e-05	0.00029921	-	-	-	-	gi|357517845|ref|XP_003629211.1|/1.14028e-146/F-box family protein [Medicago truncatula]
Glyma11g34000	921	46	104	5.93598	13.4845	1.18374	Up	1.53e-06	4.48e-05	K13412|1|5e-07|53.5|vcn:VOLCADRAFT_74309|calcium-dependent protein kinase [EC:2.7.11.1]	-	-	-	gi|351724417|ref|NP_001236545.1|/4.17101e-81/uncharacterized protein LOC100526962 [Glycine max]
Glyma04g05720	811	126	284	18.4648	41.8176	1.17933	Up	2e-15	1.71e-13	K13993|1|5e-70|262|gmx:100777239|HSP20 family protein	-	-	-	gi|351720919|ref|NP_001237960.1|/4.8465e-88/uncharacterized protein LOC100306126 [Glycine max]
Glyma08g17880	1450	87	196	7.13092	16.1417	1.17863	Up	4.41e-11	2.49e-09	K14488|1|4e-73|273|gmx:100806044|SAUR family protein	-	-	GO:0009725//response to hormone stimulus	gi|356528687|ref|XP_003532931.1|/5.13545e-72/PREDICTED: auxin-induced protein X15-like [Glycine max]
Glyma15g05060	2718	327	733	14.2986	32.2045	1.17139	Up	5.87e-37	1.63e-34	K13418|1|5e-64|244|rcu:RCOM_0186340|somatic embryogenesis receptor kinase 1 [EC:2.7.10.1 2.7.11.1];K13416|3|7e-64|244|rcu:RCOM_1534760|brassinosteroid insensitive 1-associated receptor kinase 1 [EC:2.7.10.1 2.7.11.1]	-	GO:0004672//protein kinase activity;GO:0032559	GO:0006464//cellular protein modification process	gi|356558471|ref|XP_003547530.1|/0/PREDICTED: probable receptor-like protein kinase At1g11050-like [Glycine max]
Glyma14g06710	1440	54	121	4.45683	10.0342	1.17084	Up	2.7e-07	9.13e-06	K13065|1|6e-27|120|ath:AT5G48930|shikimate O-hydroxycinnamoyltransferase [EC:2.3.1.133]	-	GO:0016747//transferase activity, transferring acyl groups other than amino-acyl groups	GO:0009628//response to abiotic stimulus	gi|356553798|ref|XP_003545239.1|/0/PREDICTED: BAHD acyltransferase DCR-like [Glycine max]
Glyma16g01715	1287	361	804	33.3367	74.6	1.16206	Up	6.95e-40	2.12e-37	K05283|1|2e-10|65.5|aly:ARALYDRAFT_354960|phosphatidylinositol glycan, class W [EC:2.3.-.-];K11982|2|8e-09|60.1|sbi:SORBI_03g011120|E3 ubiquitin-protein ligase RNF115/126 [EC:6.3.2.19]	-	GO:0046914//transition metal ion binding	-	gi|351725055|ref|NP_001237079.1|/4.36001e-80/uncharacterized protein LOC100500375 [Glycine max]
Glyma14g27015	2460	128	285	6.184	13.8347	1.16169	Up	3.84e-15	3.19e-13	K13430|1|2e-46|186|zma:100283091|serine/threonine-protein kinase PBS1 [EC:2.7.11.1];K04733|3|3e-46|185|smo:SELMODRAFT_159261|interleukin-1 receptor-associated kinase 4 [EC:2.7.11.1];K13416|4|2e-45|182|ath:AT4G33430|brassinosteroid insensitive 1-associated receptor kinase 1 [EC:2.7.10.1 2.7.11.1]	-	GO:0004871//signal transducer activity;GO:0004672//protein kinase activity;GO:0000166//nucleotide binding	-	gi|356551391|ref|XP_003544059.1|/0/PREDICTED: probable receptor-like protein kinase At1g67000-like [Glycine max]
Glyma07g01730	1076	621	1381	68.592	153.265	1.15992	Up	4.63e-67	3.85e-64	K02866|1|9e-08|56.2|osa:4332737|large subunit ribosomal protein L10e	-	GO:0016791//phosphatase activity;GO:0016791//phosphatase activity	-	gi|41400345|gb|AAS07026.1|/3.38362e-115/vegetative storage protein [Glycine falcata]
Glyma07g08311	1068	54	120	6.0092	13.4175	1.15887	Up	3.77e-07	1.24e-05	-	-	-	-	gi|356520457|ref|XP_003528878.1|/1.45516e-99/PREDICTED: BON1-associated protein 2-like [Glycine max]
Glyma15g42590	1965	1537	3387	92.9621	205.833	1.14676	Up	7.82e-159	5.64e-155	K01188|1|2e-138|491|rcu:RCOM_0827440|beta-glucosidase [EC:3.2.1.21]	-	GO:0008422//beta-glucosidase activity;GO:0008422//beta-glucosidase activity;GO:0043167//ion binding;GO:0008422//beta-glucosidase activity	GO:0005975//carbohydrate metabolic process;GO:0005975//carbohydrate metabolic process;GO:0005975//carbohydrate metabolic process	gi|356557126|ref|XP_003546869.1|/0/PREDICTED: vicianin hydrolase-like [Glycine max]
Glyma20g23540	1010	102	224	12.0025	26.4843	1.1418	Up	6.43e-12	3.99e-10	-	-	-	-	gi|356575407|ref|XP_003555833.1|/2.59786e-119/PREDICTED: GEM-like protein 4-like [Glycine max]
Glyma09g01920	723	47	103	7.72599	17.0122	1.13878	Up	3.51e-06	9.57e-05	-	-	-	-	gi|356532880|ref|XP_003534997.1|/1.33819e-27/PREDICTED: uncharacterized protein LOC100500487 [Glycine max]
Glyma17g34590	2701	508	1113	22.3529	49.2076	1.13842	Up	7.7e-53	4.12e-50	K01193|1|0.0|1043|gmx:100806753|beta-fructofuranosidase [EC:3.2.1.26]	-	GO:0004553//hydrolase activity, hydrolyzing O-glycosyl compounds;GO:0016798//hydrolase activity, acting on glycosyl bonds	GO:0008152//metabolic process;GO:0008152//metabolic process	gi|356562175|ref|XP_003549347.1|/0/PREDICTED: fructan 6-exohydrolase-like [Glycine max]
Glyma13g37770	851	147	322	20.5297	45.1843	1.13811	Up	2.04e-16	1.9e-14	-	-	-	-	gi|356549968|ref|XP_003543362.1|/3.97612e-27/PREDICTED: uncharacterized protein LOC100796236 [Glycine max]
Glyma02g01100	4385	1102	2410	29.868	65.631	1.13578	Up	7.17e-112	1.73e-108	K05658|1|0.0|2217|gmx:100800034|ATP-binding cassette, subfamily B (MDR/TAP), member 1	GO:0031224//intrinsic to membrane	GO:0042626//ATPase activity, coupled to transmembrane movement of substances;GO:0032559	GO:0006810//transport;GO:0009207	gi|356499544|ref|XP_003518599.1|/0/PREDICTED: ABC transporter B family member 4-like [Glycine max]
Glyma15g39750	1480	150	328	12.0455	26.4651	1.1356	Up	1.21e-16	1.14e-14	K04125|1|6e-144|509|pop:POPTR_550316|gibberellin 2-oxidase [EC:1.14.11.13]	-	GO:0046914//transition metal ion binding;GO:0016706//oxidoreductase activity, acting on paired donors, with incorporation or reduction of molecular oxygen, 2-oxoglutarate as one donor, and incorporation of one atom each of oxygen into both donors;GO:0016701//oxidoreductase activity, acting on single donors with incorporation of molecular oxygen	GO:0008152//metabolic process	gi|356556910|ref|XP_003546763.1|/0/PREDICTED: gibberellin 2-beta-dioxygenase 1-like [Glycine max]
Glyma03g14040	2384	103	225	5.13482	11.2704	1.13415	Up	7.48e-12	4.58e-10	-	-	GO:0005488//binding	-	gi|356504278|ref|XP_003520924.1|/3.18882e-128/PREDICTED: uncharacterized protein LOC100802736 [Glycine max]
Glyma18g52610	2566	237	517	10.9771	24.06	1.13214	Up	3.16e-25	5.02e-23	K03283|1|0.0|1188|gmx:100787543|heat shock 70kDa protein 1/8	-	GO:0016628//oxidoreductase activity, acting on the CH-CH group of donors, NAD or NADP as acceptor;GO:0032559	GO:0008152//metabolic process;GO:0050896//response to stimulus	gi|356568992|ref|XP_003552691.1|/0/PREDICTED: heat shock cognate 70 kDa protein 2-like isoform 1 [Glycine max]
Glyma08g02560	1374	40	87	3.45993	7.56126	1.12788	Up	2.37e-05	0.000537333	-	-	-	-	gi|356527676|ref|XP_003532434.1|/8.1749e-72/PREDICTED: uncharacterized protein LOC100779644 [Glycine max]
Glyma19g38590	933	41	89	5.22272	11.3912	1.12505	Up	1.98e-05	0.000457166	K08488|1|8e-18|89.4|ath:AT1G32270|syntaxin 7	-	-	-	gi|356572610|ref|XP_003554461.1|/4.04943e-124/PREDICTED: putative syntaxin-24-like [Glycine max]
Glyma11g08190	1120	345	747	36.6096	79.646	1.12138	Up	3.33e-35	8.64e-33	K03686|1|3e-11|67.8|smo:SELMODRAFT_167519|molecular chaperone DnaJ	-	GO:0005515//protein binding	GO:0044267//cellular protein metabolic process	gi|359806673|ref|NP_001241283.1|/5.22641e-79/uncharacterized protein LOC100800959 [Glycine max]
Glyma09g17151	1434	61	132	5.05563	10.9922	1.12052	Up	2.13e-07	7.29e-06	-	-	-	-	gi|356530703|ref|XP_003533920.1|/4.38419e-108/PREDICTED: uncharacterized protein LOC100780372 [Glycine max]
Glyma10g00930	1341	55	119	4.87448	10.5969	1.12032	Up	8.5e-07	2.62e-05	K09422|1|7e-141|498|gmx:100806975|myb proto-oncogene protein, plant	GO:0043231//intracellular membrane-bounded organelle	GO:0003676//nucleic acid binding	-	gi|5139802|dbj|BAA81730.1|/8.88166e-140/GmMYB29A1 [Glycine max]
Glyma01g40450	1457	56	121	4.56797	9.91716	1.11838	Up	7.12e-07	2.23e-05	K09338|1|3e-66|251|ath:AT4G37790|homeobox-leucine zipper protein	-	GO:0003677//DNA binding	GO:0006351//transcription, DNA-dependent	gi|356497023|ref|XP_003517364.1|/8.96933e-125/PREDICTED: homeobox-leucine zipper protein HAT22-like [Glycine max]
Glyma06g04490	1737	152	328	10.4001	22.5494	1.11649	Up	3.1e-16	2.84e-14	K09286|1|5e-43|174|rcu:RCOM_1589590|EREBP-like factor	GO:0043231//intracellular membrane-bounded organelle;GO:0043231//intracellular membrane-bounded organelle	GO:0003676//nucleic acid binding;GO:0001071//nucleic acid binding transcription factor activity;GO:0003676//nucleic acid binding;GO:0001071//nucleic acid binding transcription factor activity	GO:0006351//transcription, DNA-dependent;GO:0006351//transcription, DNA-dependent	gi|238535496|gb|ACR44231.1|/1.26593e-67/drought responsive element binding protein 2 [Glycine max]
Glyma06g42935	798	57	123	8.48919	18.4062	1.11649	Up	5.97e-07	1.9e-05	-	-	-	-	-
Glyma04g43090	2092	45	97	2.5565	5.53696	1.11493	Up	9.67e-06	0.000239912	K14494|1|4e-47|187|ppp:PHYPADRAFT_235432|DELLA protein	GO:0005635//nuclear envelope	-	GO:0044403//symbiosis, encompassing mutualism through parasitism	gi|356507664|ref|XP_003522584.1|/0/PREDICTED: nodulation-signaling pathway 2 protein-like [Glycine max]
Glyma16g26940	1770	58	125	3.89448	8.43331	1.11467	Up	5e-07	1.62e-05	K00261|1|0.0|830|gmx:100777869|glutamate dehydrogenase (NAD(P)+) [EC:1.4.1.3]	GO:0043231//intracellular membrane-bounded organelle	GO:0046914//transition metal ion binding;GO:0016639//oxidoreductase activity, acting on the CH-NH2 group of donors, NAD or NADP as acceptor;GO:0032559	GO:0019222//regulation of metabolic process;GO:0009642//response to light intensity;GO:0006970//response to osmotic stress;GO:0019752//carboxylic acid metabolic process;GO:0010038//response to metal ion	gi|356559551|ref|XP_003548062.1|/0/PREDICTED: glutamate dehydrogenase B-like [Glycine max]
Glyma15g07700	1905	241	519	15.0355	32.5337	1.11357	Up	1.08e-24	1.68e-22	K00422|1|1e-106|385|vvi:100256583|polyphenol oxidase [EC:1.10.3.1]	GO:0044424//intracellular part	-	-	gi|94450151|gb|ABF19601.1|/1.13128e-160/polyphenol oxidase [Camellia ptilophylla]
Glyma19g34250	4254	54	116	1.50866	3.25628	1.10996	Up	1.41e-06	4.15e-05	K01537|1|0.0|1278|aly:ARALYDRAFT_486846|Ca2+-transporting ATPase [EC:3.6.3.8]	GO:0031224//intrinsic to membrane	GO:0046873//metal ion transmembrane transporter activity;GO:0019829//cation-transporting ATPase activity;GO:0005515//protein binding;GO:0032559	GO:0009206;GO:0006816//calcium ion transport	gi|356570602|ref|XP_003553474.1|/0/PREDICTED: calcium-transporting ATPase 12, plasma membrane-type-like [Glycine max]
Glyma20g33800	2304	299	641	15.4235	33.2229	1.10705	Up	7.5e-30	1.5e-27	K09286|1|9e-33|140|pop:POPTR_588763|EREBP-like factor	-	-	-	gi|351727921|ref|NP_001237945.1|/4.01951e-112/uncharacterized protein LOC100306125 [Glycine max]
Glyma13g35800	1341	103	220	9.12857	19.5909	1.10173	Up	3.72e-11	2.13e-09	K08914|1|2e-143|507|vvi:100260599|light-harvesting complex II chlorophyll a/b binding protein 3	GO:0009536//plastid	-	GO:0006091//generation of precursor metabolites and energy	gi|359806176|ref|NP_001241200.1|/1.9633e-155/uncharacterized protein LOC100790960 [Glycine max]
Glyma06g12010	2077	772	1647	44.1749	94.6932	1.10003	Up	2.88e-73	2.97e-70	K00128|1|0.0|938|gmx:100783726|aldehyde dehydrogenase (NAD+) [EC:1.2.1.3]	-	GO:0016620//oxidoreductase activity, acting on the aldehyde or oxo group of donors, NAD or NADP as acceptor	GO:0044237//cellular metabolic process	gi|356515906|ref|XP_003526638.1|/0/PREDICTED: aldehyde dehydrogenase family 3 member H1-like [Glycine max]
Glyma19g02650	937	106	226	13.445	28.8025	1.09913	Up	2.2e-11	1.29e-09	-	-	-	-	gi|351723291|ref|NP_001235994.1|/1.93687e-57/uncharacterized protein LOC100305480 precursor [Glycine max]
Glyma14g09760	1224	405	863	39.3249	84.1959	1.09831	Up	3.94e-39	1.18e-36	-	-	GO:0005488//binding	-	gi|390517035|ref|NP_001254622.1|/2.15164e-105/zinc finger protein ZAT10-like [Glycine max]
Glyma13g33371	866	86	183	11.8025	25.2345	1.0963	Up	1.89e-09	8.73e-08	-	-	-	-	gi|358248774|ref|NP_001239682.1|/2.21372e-81/uncharacterized protein LOC100820235 [Glycine max]
Glyma06g00831	819	64	136	9.28732	19.8297	1.09433	Up	2.38e-07	8.11e-06	K14488|1|2e-42|170|mtr:MTR_3g117640|SAUR family protein	-	-	-	gi|357467469|ref|XP_003604019.1|/2.6413e-41/Auxin-induced protein 6B [Medicago truncatula]
Glyma16g04720	2134	493	1047	27.4566	58.5887	1.09347	Up	8.73e-47	3.94e-44	-	-	GO:0003676//nucleic acid binding;GO:0001071//nucleic acid binding transcription factor activity	GO:0006351//transcription, DNA-dependent;GO:0032501//multicellular organismal process	gi|356560987|ref|XP_003548767.1|/0/PREDICTED: NAC domain-containing protein 100-like [Glycine max]
Glyma17g06610	1279	324	688	30.1071	64.2361	1.09328	Up	2.59e-31	5.66e-29	K13422|1|3e-11|67.8|ppp:PHYPADRAFT_164647|transcription factor MYC2	-	GO:0016491//oxidoreductase activity;GO:0001071//nucleic acid binding transcription factor activity;GO:0016491//oxidoreductase activity	GO:0006351//transcription, DNA-dependent	gi|255634465|gb|ACU17597.1|/1.25737e-73/unknown [Glycine max]
Glyma19g34740	1230	132	280	12.7545	27.1841	1.09176	Up	1.26e-13	9.19e-12	K09422|1|5e-153|538|gmx:100802214|myb proto-oncogene protein, plant	-	-	-	gi|356570646|ref|XP_003553496.1|/6.87471e-152/PREDICTED: myb-related protein Myb4-like [Glycine max]
Glyma1057s00200	1667	76	161	5.41842	11.5333	1.08986	Up	2.08e-08	8.31e-07	K00517|1|3e-102|370|osa:4348172|[EC:1.14.-.-];K05280|3|7e-93|339|mtr:MTR_3g025230|flavonoid 3'-monooxygenase [EC:1.14.13.21]	-	-	-	gi|356577942|ref|XP_003557080.1|/0/PREDICTED: cytochrome P450 76C1-like, partial [Glycine max]
Glyma03g31520	1289	51	108	4.70231	10.0054	1.08933	Up	4.57e-06	0.000121419	K14484|1|6e-51|199|ath:AT1G04240|auxin-responsive protein IAA	-	-	-	gi|356504973|ref|XP_003521267.1|/6.09003e-90/PREDICTED: auxin-induced protein 22E-like [Glycine max]
Glyma08g18230	609	60	127	11.7092	24.9028	1.08866	Up	6.67e-07	2.09e-05	-	-	-	-	gi|356528702|ref|XP_003532938.1|/1.89577e-28/PREDICTED: uncharacterized protein LOC100811368 [Glycine max]
Glyma10g31240	1191	301	637	30.0365	63.8689	1.0884	Up	6.48e-29	1.25e-26	-	-	-	-	gi|356535236|ref|XP_003536154.1|/2.02229e-124/PREDICTED: F-box protein PP2-B10-like [Glycine max]
Glyma11g13270	1185	99	209	9.92913	21.0615	1.08487	Up	1.93e-10	1.01e-08	K01183|1|4e-101|366|gmx:100776582|chitinase [EC:3.2.1.14]	-	GO:0004553//hydrolase activity, hydrolyzing O-glycosyl compounds;GO:0030247//polysaccharide binding	GO:0006026	gi|351723339|ref|NP_001238555.1|/4.55612e-129/uncharacterized protein LOC100527091 [Glycine max]
Glyma17g35430	1776	568	1198	38.0102	80.5518	1.08353	Up	1.6e-52	8.33e-50	-	GO:0044464//cell part	GO:0046914//transition metal ion binding	-	gi|351727090|ref|NP_001235613.1|/1.11581e-111/scof-1 protein [Glycine max]
Glyma18g09920	3772	74	156	2.3316	4.93872	1.08282	Up	4.06e-08	1.55e-06	K13457|1|4e-128|457|vvi:100252764|disease resistance protein RPM1	-	GO:0032559	GO:0012501//programmed cell death;GO:0006950//response to stress	gi|356566971|ref|XP_003551698.1|/0/PREDICTED: disease resistance protein RPM1-like [Glycine max]
Glyma06g01550	795	47	99	7.02627	14.8706	1.08163	Up	1.29e-05	0.000313272	-	-	-	-	gi|358248022|ref|NP_001240049.1|/1.58674e-35/uncharacterized protein LOC100787789 precursor [Glycine max]
Glyma19g31080	889	76	160	10.1603	21.4921	1.08087	Up	2.85e-08	1.12e-06	-	-	-	-	gi|356571935|ref|XP_003554126.1|/2.45259e-67/PREDICTED: uncharacterized protein LOC100808231 [Glycine max]
Glyma07g32050	896	58	122	7.69333	16.2597	1.07962	Up	1.31e-06	3.89e-05	K13993|1|1e-78|291|gmx:100499727|HSP20 family protein	GO:0044424//intracellular part	-	GO:0050896//response to stimulus	gi|351721881|ref|NP_001235177.1|/1.19409e-77/18.5 kDa class I heat shock protein [Glycine max]
Glyma14g35220	1740	1375	2891	93.9178	198.409	1.079	Up	2.56e-123	8.53e-120	K13030|1|9e-109|392|sbi:SORBI_01g001220|cyanohydrin beta-glucosyltransferase [EC:2.4.1.85];K13068|2|3e-67|254|aly:ARALYDRAFT_479675|sinapate 1-glucosyltransferase [EC:2.4.1.120];K13228|4|1e-63|242|zma:100274317|UDP-glucosyltransferase BX9 [EC:2.4.1.202];K13692|5|3e-63|241|vvi:100252177|UDP-glucose:(indol-3-yl)acetate beta-D-glucosyltransferase [EC:2.4.1.121]	-	GO:0035251//UDP-glucosyltransferase activity	-	gi|356552900|ref|XP_003544800.1|/0/PREDICTED: UDP-glycosyltransferase 85A2-like [Glycine max]
Glyma13g01690	1816	492	1034	32.1991	67.9933	1.07837	Up	3.11e-45	1.3e-42	K13030|1|4e-109|393|sbi:SORBI_01g001220|cyanohydrin beta-glucosyltransferase [EC:2.4.1.85];K13068|2|2e-65|248|aly:ARALYDRAFT_479675|sinapate 1-glucosyltransferase [EC:2.4.1.120];K13228|4|4e-64|244|zma:100274317|UDP-glucosyltransferase BX9 [EC:2.4.1.202];K13691|5|7e-64|243|gmx:100787483|pathogen-inducible salicylic acid glucosyltransferase [EC:2.4.1.-]	-	GO:0035251//UDP-glucosyltransferase activity	-	gi|356547881|ref|XP_003542333.1|/0/PREDICTED: UDP-glycosyltransferase 85A2-like [Glycine max]
Glyma11g08240	1588	282	590	21.1054	44.3673	1.07189	Up	2.79e-26	4.76e-24	-	GO:0031224//intrinsic to membrane	-	GO:0009607//response to biotic stimulus	gi|356540815|ref|XP_003538880.1|/1.08629e-179/PREDICTED: thaumatin-like protein 1-like [Glycine max]
Glyma03g01800	1223	44	92	4.27583	8.98303	1.071	Up	3.05e-05	0.000671357	-	-	-	-	gi|388516383|gb|AFK46253.1|/6.84552e-27/unknown [Lotus japonicus]
Glyma15g26790	1514	476	995	37.3659	78.48	1.0706	Up	4.21e-43	1.61e-40	K13415|1|6e-29|127|osa:4324691|protein brassinosteroid insensitive 1 [EC:2.7.10.1 2.7.11.1]	GO:0005618//cell wall	GO:0004857//enzyme inhibitor activity	GO:0023052//signaling	gi|358248196|ref|NP_001239837.1|/2.53151e-178/polygalacturonase inhibitor 1-like precursor [Glycine max]
Glyma07g10710	1231	374	781	36.1084	75.7625	1.06915	Up	4.01e-34	9.92e-32	-	-	-	-	gi|255567848|ref|XP_002524902.1|/6.0192e-47/hypothetical protein RCOM_0725500 [Ricinus communis]
Glyma07g32190	1556	125	261	9.54761	20.0305	1.06899	Up	2.03e-12	1.33e-10	K15283|1|0.0|743|gmx:100794336|solute carrier family 35, member E1	GO:0009941//chloroplast envelope;GO:0031224//intrinsic to membrane	GO:0005342//organic acid transmembrane transporter activity;GO:0015145//monosaccharide transmembrane transporter activity	GO:0015717//triose phosphate transport;GO:0009642//response to light intensity;GO:0015711//organic anion transport	gi|356521410|ref|XP_003529349.1|/0/PREDICTED: LOW QUALITY PROTEIN: triose phosphate/phosphate translocator, chloroplastic-like [Glycine max]
Glyma06g42950	393	70	146	21.169	44.3631	1.06741	Up	1.55e-07	5.42e-06	-	-	-	-	-
Glyma05g17900	1368	262	546	22.762	47.6615	1.0662	Up	3.05e-24	4.63e-22	K10577|1|2e-95|347|gmx:100500268|ubiquitin-conjugating enzyme E2 I [EC:6.3.2.19]	-	GO:0016879//ligase activity, forming carbon-nitrogen bonds;GO:0032559	GO:0006464//cellular protein modification process	gi|351726411|ref|NP_001235590.1|/2.59567e-94/uncharacterized protein LOC100500268 [Glycine max]
Glyma16g34720	1372	60	125	5.19746	10.8797	1.06576	Up	1.26e-06	3.74e-05	K02866|1|6e-39|160|osa:4332737|large subunit ribosomal protein L10e	-	GO:0016791//phosphatase activity	-	gi|351726720|ref|NP_001237136.1|/1.52394e-110/syringolide-induced protein B15-3-5 [Glycine max]
Glyma20g23420	1150	48	100	4.96064	10.384	1.06576	Up	1.48e-05	0.000355181	K00799|1|5e-129|459|gmx:547586|glutathione S-transferase [EC:2.5.1.18]	-	GO:0003824//catalytic activity	-	gi|255640940|gb|ACU20750.1|/1.1229e-128/unknown [Glycine max]
Glyma08g39390	2183	1687	3505	91.845	191.733	1.06182	Up	2.72e-145	1.31e-141	-	-	GO:0016491//oxidoreductase activity	GO:0010038//response to metal ion;GO:0009860//pollen tube growth	gi|356526803|ref|XP_003532006.1|/0/PREDICTED: probable nucleoredoxin 1-like [Glycine max]
Glyma03g02410	1860	266	552	16.9966	35.4395	1.06011	Up	2.8e-24	4.27e-22	K00517|1|1e-121|435|osa:4348172|[EC:1.14.-.-];K16084|3|1e-98|358|osa:4329723|cytochrome P450, family 76, subfamily M, polypeptide 7 (ent-cassa-12,15-diene 11-hydroxylase) [EC:1.14.13.145];K05280|4|7e-94|343|mtr:MTR_3g025230|flavonoid 3'-monooxygenase [EC:1.14.13.21]	-	GO:0016491//oxidoreductase activity;GO:0005506//iron ion binding	-	gi|356505481|ref|XP_003521519.1|/0/PREDICTED: cytochrome P450 76C4-like [Glycine max]
Glyma12g13315	603	262	543	51.6391	107.534	1.05825	Up	7.61e-24	1.13e-21	K09286|1|1e-22|103|aly:ARALYDRAFT_494572|EREBP-like factor	-	-	-	gi|356542979|ref|XP_003539941.1|/2.9557e-66/PREDICTED: ethylene-responsive transcription factor 9-like [Glycine max]
Glyma10g41260	1139	140	290	14.6083	30.4044	1.05749	Up	2e-13	1.42e-11	-	-	-	-	gi|356536232|ref|XP_003536643.1|/9.73354e-89/PREDICTED: uncharacterized protein LOC100794402 [Glycine max]
Glyma05g08100	4760	72	149	1.79771	3.73801	1.05611	Up	1.48e-07	5.22e-06	K05681|1|2e-48|193|cme:CMS467C|ATP-binding cassette, subfamily G (WHITE), member 2;K12843|3|2e-44|180|vvi:100248403|U4/U6 small nuclear ribonucleoprotein PRP3	GO:0044464//cell part	GO:0017111//nucleoside-triphosphatase activity;GO:0032559	GO:0009207	gi|356511619|ref|XP_003524521.1|/0/PREDICTED: ABC transporter G family member 32-like isoform 1 [Glycine max]
Glyma13g01131	985	110	227	13.2724	27.5202	1.05206	Up	9.66e-11	5.25e-09	K08235|1|9e-84|308|vvi:100252949|xyloglucan:xyloglucosyl transferase [EC:2.4.1.207];K14504|4|2e-83|306|vvi:100256520|xyloglucan:xyloglucosyl transferase TCH4 [EC:2.4.1.207]	-	GO:0016740//transferase activity	-	gi|356564854|ref|XP_003550662.1|/1.20388e-89/PREDICTED: uncharacterized protein LOC100782365 [Glycine max]
Glyma13g07910	3064	1709	3520	66.29	137.188	1.04929	Up	3.87e-143	1.68e-139	K12843|1|1e-44|180|vvi:100248403|U4/U6 small nuclear ribonucleoprotein PRP3;K05681|2|2e-43|176|cme:CMS467C|ATP-binding cassette, subfamily G (WHITE), member 2	-	GO:0017111//nucleoside-triphosphatase activity;GO:0000166//nucleotide binding;GO:0017111//nucleoside-triphosphatase activity;GO:0000166//nucleotide binding	-	gi|356546014|ref|XP_003541427.1|/0/PREDICTED: ABC transporter G family member 11-like [Glycine max]
Glyma16g04940	1636	85	175	6.1749	12.7737	1.04869	Up	1.47e-08	6.06e-07	K05298|1|0.0|717|gmx:100815649|glyceraldehyde-3-phosphate dehydrogenase (NADP+) (phosphorylating) [EC:1.2.1.13]	GO:0009536//plastid	GO:0000166//nucleotide binding	GO:0015977//carbon fixation;GO:0019318//hexose metabolic process	gi|356561064|ref|XP_003548805.1|/0/PREDICTED: glyceraldehyde-3-phosphate dehydrogenase A, chloroplastic-like [Glycine max]
Glyma08g18891	1005	251	516	29.6826	61.312	1.04655	Up	2.34e-22	3.18e-20	-	-	-	-	-
Glyma16g24690	2003	157	321	9.31565	19.1375	1.03868	Up	2.54e-14	1.97e-12	K08900|1|1e-137|488|pop:POPTR_563200|mitochondrial chaperone BCS1;K13120|2|6e-124|443|vvi:100263357|protein FAM32A	-	GO:0032559;GO:0016462//pyrophosphatase activity	-	gi|356559349|ref|XP_003547962.1|/0/PREDICTED: probable mitochondrial chaperone BCS1-B-like isoform 1 [Glycine max]
Glyma17g33470	1881	45	92	2.84327	5.84064	1.03858	Up	4.77e-05	0.000998834	K05658|1|8e-112|402|vvi:100262734|ATP-binding cassette, subfamily B (MDR/TAP), member 1;K00924|2|1e-102|372|osa:4337593|[EC:2.7.1.-]	-	GO:0004713//protein tyrosine kinase activity;GO:0032559	GO:0006464//cellular protein modification process	gi|356552460|ref|XP_003544585.1|/0/PREDICTED: serine/threonine-protein kinase At5g01020-like [Glycine max]
Glyma17g18310	717	201	410	33.3174	68.2851	1.0353	Up	8.61e-18	8.98e-16	K09422|1|1e-23|92.0|pop:POPTR_1083038|myb proto-oncogene protein, plant	GO:0043231//intracellular membrane-bounded organelle	GO:0003676//nucleic acid binding	-	gi|356511903|ref|XP_003524661.1|/7.76129e-36/PREDICTED: transcription factor MYB44-like [Glycine max]
Glyma04g04270	1689	459	936	32.2981	66.1771	1.03488	Up	1.52e-38	4.43e-36	K13065|1|3e-26|118|ath:AT5G48930|shikimate O-hydroxycinnamoyltransferase [EC:2.3.1.133];K15400|4|8e-23|107|pop:POPTR_797957|omega-hydroxypalmitate O-feruloyl transferase [EC:2.3.1.188]	-	-	-	gi|83853811|gb|ABC47844.1|/0/N-hydroxycinnamoyl/benzoyltransferase 2 [Glycine max]
Glyma01g42580	2021	54	110	3.17557	6.49962	1.03334	Up	9.37e-06	0.000233504	K00030|1|7e-132|469|vvi:100242228|isocitrate dehydrogenase (NAD+) [EC:1.1.1.41];K09587|2|6e-86|317|gmx:100789515|cytochrome P450, family 90, subfamily B, polypeptide 1 (steroid 22-alpha-hydroxylase) [EC:1.14.13.-];K09588|5|3e-84|311|gmx:100781291|cytochrome P450, family 90, subfamily A, polypeptide 1 [EC:1.14.-.-]	-	GO:0016709//oxidoreductase activity, acting on paired donors, with incorporation or reduction of molecular oxygen, NAD(P)H as one donor, and incorporation of one atom of oxygen;GO:0005506//iron ion binding	GO:0008152//metabolic process	gi|356495655|ref|XP_003516690.1|/0/PREDICTED: cytochrome P450 87A3-like [Glycine max]
Glyma19g07600	1003	170	346	20.1438	41.1943	1.0321	Up	3.52e-15	2.93e-13	-	GO:0043231//intracellular membrane-bounded organelle	-	-	gi|358248690|ref|NP_001239668.1|/7.08933e-77/uncharacterized protein LOC100815369 [Glycine max]
Glyma06g04010	1652	176	358	12.6618	25.8782	1.03125	Up	1.23e-15	1.07e-13	K09422|1|2e-46|185|ath:AT2G23290|myb proto-oncogene protein, plant	GO:0043231//intracellular membrane-bounded organelle	GO:0003676//nucleic acid binding	-	gi|351721300|ref|NP_001235925.1|/1.05623e-116/MYB transcription factor MYB124 [Glycine max]
Glyma06g10580	1180	63	128	6.34531	12.9536	1.02959	Up	1.86e-06	5.36e-05	-	-	-	-	gi|351727737|ref|NP_001237171.1|/8.08244e-70/uncharacterized protein LOC100500381 [Glycine max]
Glyma01g07690	2708	837	1699	36.7343	74.9215	1.02825	Up	7.72e-68	6.68e-65	-	-	-	-	gi|356495071|ref|XP_003516404.1|/0/PREDICTED: uncharacterized protein L728-like [Glycine max]
Glyma02g10490	1058	82	166	9.21134	18.7363	1.02435	Up	6.26e-08	2.33e-06	-	-	-	-	gi|351723355|ref|NP_001237020.1|/1.63977e-87/uncharacterized protein LOC100500371 [Glycine max]
Glyma10g06710	1193	85	172	8.46784	17.2167	1.02374	Up	3.67e-08	1.42e-06	K01674|1|2e-164|576|gmx:100797935|carbonic anhydrase [EC:4.2.1.1]	-	GO:0046914//transition metal ion binding;GO:0016836//hydro-lyase activity	GO:0044237//cellular metabolic process	gi|356533269|ref|XP_003535188.1|/2.84852e-163/PREDICTED: bifunctional monodehydroascorbate reductase and carbonic anhydrase nectarin-3-like [Glycine max]
Glyma12g13290	1305	1155	2330	105.188	213.21	1.0193	Up	4.7e-91	7.54e-88	K01090|1|1e-37|155|sbi:SORBI_01g038410|protein phosphatase [EC:3.1.3.16];K14497|3|4e-30|130|pop:POPTR_422871|protein phosphatase 2C [EC:3.1.3.16]	-	GO:0004721//phosphoprotein phosphatase activity	-	gi|356542975|ref|XP_003539939.1|/6.93731e-158/PREDICTED: probable protein phosphatase 2C 58-like [Glycine max]
Glyma19g44530	3151	61	123	2.30078	4.66142	1.01864	Up	3.61e-06	9.8e-05	-	-	-	-	gi|356571244|ref|XP_003553789.1|/0/PREDICTED: uncharacterized protein KIAA1530-like [Glycine max]
Glyma09g28870	3011	88	177	3.47349	7.01979	1.01504	Up	2.91e-08	1.14e-06	K05681|1|4e-70|265|cme:CMS467C|ATP-binding cassette, subfamily G (WHITE), member 2;K12843|2|3e-68|258|vvi:100248403|U4/U6 small nuclear ribonucleoprotein PRP3;K05663|4|4e-17|89.0|sbi:SORBI_01g036355|mitochondrial ABC transporter ATM	GO:0044464//cell part	GO:0017111//nucleoside-triphosphatase activity;GO:0015604//organic phosphonate transmembrane transporter activity;GO:0032559	GO:0009207	gi|356531001|ref|XP_003534067.1|/0/PREDICTED: ABC transporter G family member 11-like [Glycine max]
Glyma08g29140	290	88	177	36.0644	72.8848	1.01504	Up	2.91e-08	1.14e-06	-	GO:0031224//intrinsic to membrane;GO:0009941//chloroplast envelope	-	-	gi|91214187|ref|YP_538810.1|/7.47149e-46/hypothetical chloroplast RF1 [Glycine max]
Glyma13g37750	1216	531	1065	51.8986	104.587	1.01094	Up	4.86e-42	1.71e-39	-	-	-	-	gi|351722593|ref|NP_001234946.1|/7.20197e-45/uncharacterized protein LOC100500480 [Glycine max]
Glyma11g18640	878	59	118	7.98642	16.049	1.00687	Up	7e-06	0.000179086	K14332|1|3e-52|203|rcu:RCOM_1282260|photosystem I subunit PsaO	GO:0009521;GO:0009536//plastid	-	GO:0009765//photosynthesis, light harvesting	gi|351734544|ref|NP_001236146.1|/3.98094e-62/uncharacterized protein LOC100305746 [Glycine max]
Glyma07g14340	1062	56	112	6.26697	12.5937	1.00687	Up	1.2e-05	0.000292889	K08901|1|3e-113|406|gmx:100306034|photosystem II oxygen-evolving enhancer protein 3	GO:0009523//photosystem II;GO:0009532//plastid stroma;GO:0009534//chloroplast thylakoid;GO:0005576//extracellular region	GO:0046872//metal ion binding	GO:0044237//cellular metabolic process	gi|351724301|ref|NP_001236541.1|/3.31014e-112/uncharacterized protein LOC100306034 [Glycine max]
Glyma06g11140	3083	76	152	2.92978	5.88751	1.00687	Up	3.32e-07	1.11e-05	-	GO:0031224//intrinsic to membrane;GO:0031224//intrinsic to membrane	GO:0015291//secondary active transmembrane transporter activity;GO:0015291//secondary active transmembrane transporter activity	GO:0015698//inorganic anion transport;GO:0015698//inorganic anion transport	gi|356515816|ref|XP_003526594.1|/0/PREDICTED: sulfate transporter 1.3-like [Glycine max]
Glyma11g34780	1794	90	180	5.96231	11.9815	1.00687	Up	2.75e-08	1.08e-06	K15015|1|1e-09|63.2|vvi:100242701|solute carrier family 32 (vesicular inhibitory amino acid transporter);K14209|2|2e-09|62.4|ppp:PHYPADRAFT_115714|solute carrier family 36 (proton-coupled amino acid transporter)	GO:0031224//intrinsic to membrane;GO:0031224//intrinsic to membrane;GO:0031224//intrinsic to membrane	GO:0015175//neutral amino acid transmembrane transporter activity;GO:0015175//neutral amino acid transmembrane transporter activity;GO:0015175//neutral amino acid transmembrane transporter activity	GO:0003333//amino acid transmembrane transport;GO:0015804//neutral amino acid transport;GO:0003333//amino acid transmembrane transport;GO:0015804//neutral amino acid transport;GO:0003333//amino acid transmembrane transport;GO:0015804//neutral amino acid transport	gi|356539917|ref|XP_003538439.1|/0/PREDICTED: lysine histidine transporter-like 5-like [Glycine max]
Glyma07g16810	1233	214	426	20.6274	41.258	1.00011	Up	1.72e-17	1.75e-15	K00799|1|6e-120|429|gmx:100808141|glutathione S-transferase [EC:2.5.1.18]	-	GO:0016765//transferase activity, transferring alkyl or aryl (other than methyl) groups	GO:0050896//response to stimulus	gi|351727399|ref|NP_001238439.1|/1.00673e-126/probable glutathione S-transferase [Glycine max]
Glyma20g24530	1696	25	2	1.7519	0.14082	-3.63699	Down	3.21e-06	8.8e-05	K10256|1|0.0|822|gmx:100805777|omega-6 fatty acid desaturase (delta-12 desaturase) [EC:1.14.19.-]	GO:0031090//organelle membrane;GO:0043231//intracellular membrane-bounded organelle;GO:0031224//intrinsic to membrane;GO:0031090//organelle membrane;GO:0043231//intracellular membrane-bounded organelle;GO:0031224//intrinsic to membrane;GO:0031090//organelle membrane;GO:0043231//intracellular membrane-bounded organelle;GO:0031224//intrinsic to membrane;GO:0031090//organelle membrane;GO:0043231//in…	GO:0016628//oxidoreductase activity, acting on the CH-CH group of donors, NAD or NADP as acceptor;GO:0016705//oxidoreductase activity, acting on paired donors, with incorporation or reduction of molecular oxygen;GO:0016628//oxidoreductase activity, acting on the CH-CH group of donors, NAD or NADP as acceptor;GO:0016705//oxidoreductase activity, acting on paired donors, with incorporation or reduc…	GO:0006631//fatty acid metabolic process;GO:0006631//fatty acid metabolic process;GO:0006631//fatty acid metabolic process;GO:0006631//fatty acid metabolic process;GO:0006631//fatty acid metabolic process	gi|59956944|dbj|BAD89861.1|/0/microsomal omega-6 fatty acid desaturase [Glycine max]
Glyma05g16706	971	30	3	3.67195	0.368947	-3.31506	Down	8.19e-07	2.53e-05	-	-	-	-	gi|358345829|ref|XP_003636977.1|/9.2258e-18/hypothetical protein MTR_066s1004 [Medicago truncatula]
Glyma09g37050	1659	91	12	6.51913	0.863767	-2.91597	Down	2.36e-16	2.18e-14	-	-	-	-	gi|356529918|ref|XP_003533533.1|/0/PREDICTED: NAC domain-containing protein 100-like [Glycine max]
Glyma16g28900	4548	44	6	1.14981	0.157541	-2.8676	Down	2.01e-08	8.07e-07	K05666|1|4e-155|548|olu:OSTLU_35503|ATP-binding cassette, subfamily C (CFTR/MRP), member 2;K05658|2|5e-54|212|gmx:100787093|ATP-binding cassette, subfamily B (MDR/TAP), member 1	GO:0031224//intrinsic to membrane	GO:0017111//nucleoside-triphosphatase activity;GO:0016491//oxidoreductase activity;GO:0015405;GO:0032559	GO:0006810//transport;GO:0009207	gi|356561462|ref|XP_003549000.1|/0/PREDICTED: ABC transporter C family member 10-like [Glycine max]
Glyma19g03760	1760	75	13	5.06457	0.882048	-2.52151	Down	6.33e-12	3.95e-10	K14329|1|8e-63|239|ath:AT5G61160|agmatine coumaroyltransferase [EC:2.3.1.64 2.3.1.-];K13065|3|8e-18|90.5|pop:POPTR_784746|shikimate O-hydroxycinnamoyltransferase [EC:2.3.1.133]	-	-	-	gi|356573487|ref|XP_003554890.1|/0/PREDICTED: agmatine coumaroyltransferase-like [Glycine max]
Glyma16g01296	2033	28	5	1.63687	0.293693	-2.47856	Down	4.09e-05	0.000868973	K10884|1|7e-08|57.8|cre:CHLREDRAFT_205970|ATP-dependent DNA helicase 2 subunit 1	-	GO:0005488//binding;GO:0005488//binding	-	gi|356560181|ref|XP_003548373.1|/0/PREDICTED: zinc finger CCCH domain-containing protein 62-like [Glycine max]
Glyma18g12660	2445	305	57	14.8257	2.78393	-2.41291	Down	4.6e-42	1.63e-39	K12450|1|0.0|1027|vvi:100260586|UDP-glucose 4,6-dehydratase [EC:4.2.1.76]	-	GO:0016616//oxidoreductase activity, acting on the CH-OH group of donors, NAD or NADP as acceptor;GO:0048037//cofactor binding;GO:0016836//hydro-lyase activity;GO:0016616//oxidoreductase activity, acting on the CH-OH group of donors, NAD or NADP as acceptor;GO:0048037//cofactor binding;GO:0016836//hydro-lyase activity;GO:0016616//oxidoreductase activity, acting on the CH-OH group of donors, NAD o…	GO:0009226//nucleotide-sugar biosynthetic process;GO:0051553;GO:0009734//auxin mediated signaling pathway;GO:0033692//cellular polysaccharide biosynthetic process;GO:0009226//nucleotide-sugar biosynthetic process;GO:0051553;GO:0009734//auxin mediated signaling pathway;GO:0033692//cellular polysaccharide biosynthetic process;GO:0009226//nucleotide-sugar biosynthetic process;GO:0051553;GO:0009734//…	gi|356567412|ref|XP_003551914.1|/0/PREDICTED: probable rhamnose biosynthetic enzyme 1-like [Glycine max]
Glyma13g01330	1791	31	6	2.05712	0.400053	-2.36237	Down	2.59e-05	0.000579143	K05387|1|5e-76|283|ath:AT2G29110|glutamate receptor, ionotropic, other eukaryote	-	-	-	gi|356547777|ref|XP_003542285.1|/0/PREDICTED: glutamate receptor 2.8-like [Glycine max]
Glyma06g02630	987	124	25	14.9313	3.02471	-2.30347	Down	4.33e-17	4.28e-15	-	GO:0031224//intrinsic to membrane	-	GO:0009607//response to biotic stimulus	gi|356517970|ref|XP_003527657.1|/7.68205e-177/PREDICTED: thaumatin-like protein 1-like [Glycine max]
Glyma19g03770	1395	237	49	20.1915	4.19453	-2.26717	Down	9.18e-31	1.91e-28	K14329|1|1e-62|239|ath:AT5G61160|agmatine coumaroyltransferase [EC:2.3.1.64 2.3.1.-];K13065|3|9e-19|93.2|sbi:SORBI_04g025760|shikimate O-hydroxycinnamoyltransferase [EC:2.3.1.133]	-	-	-	gi|356573495|ref|XP_003554894.1|/0/PREDICTED: agmatine coumaroyltransferase-like [Glycine max]
Glyma13g11150	1721	146	31	10.0825	2.15101	-2.22876	Down	3.81e-19	4.26e-17	K13420|1|7e-29|127|sbi:SORBI_06g028760|LRR receptor-like serine/threonine-protein kinase FLS2 [EC:2.7.11.1]	-	-	-	gi|356551279|ref|XP_003544004.1|/0/PREDICTED: leucine-rich repeat receptor-like serine/threonine-protein kinase BAM2-like [Glycine max]
Glyma08g42440	1974	178	38	10.7169	2.29878	-2.22094	Down	6.26e-23	8.78e-21	K13065|1|1e-76|286|rcu:RCOM_1442250|shikimate O-hydroxycinnamoyltransferase [EC:2.3.1.133]	-	-	-	gi|356527016|ref|XP_003532110.1|/0/PREDICTED: hydroxycinnamoyl-Coenzyme A shikimate/quinate hydroxycinnamoyltransferase-like [Glycine max]
Glyma18g40186	1095	41	9	4.45004	0.981499	-2.18076	Down	3.67e-06	9.96e-05	K05278|1|3e-47|187|pop:POPTR_665178|flavonol synthase [EC:1.14.11.23];K06892|2|6e-47|186|ath:AT3G19010|;K05277|3|7e-47|186|ath:AT4G22880|leucoanthocyanidin dioxygenase [EC:1.14.11.19]	-	-	-	gi|356567967|ref|XP_003552186.1|/7.36654e-163/PREDICTED: protein SRG1-like [Glycine max]
Glyma09g03270	2197	38	9	2.05564	0.489186	-2.07114	Down	1.64e-05	0.000387296	-	-	GO:0016491//oxidoreductase activity;GO:0050662//coenzyme binding	GO:0008152//metabolic process	gi|356532461|ref|XP_003534791.1|/0/PREDICTED: reticuline oxidase-like protein-like [Glycine max]
Glyma08g40670	1683	590	143	41.6641	10.1464	-2.03783	Down	4.98e-65	3.78e-62	K09510|1|1e-92|338|vvi:100246709|DnaJ homolog subfamily B member 4;K09519|3|3e-74|277|sbi:SORBI_09g002340|DnaJ homolog subfamily B member 13	-	GO:0005515//protein binding	-	gi|356526884|ref|XP_003532046.1|/7.38533e-166/PREDICTED: dnaJ homolog subfamily B member 5-like [Glycine max]
Glyma06g14850	1364	111	27	9.6717	2.3638	-2.03266	Down	2.06e-13	1.46e-11	-	GO:0044464//cell part	-	-	gi|358248299|ref|NP_001240113.1|/4.82398e-133/expansin precursor [Glycine max]
Glyma16g30000	2398	41	10	2.03203	0.497981	-2.02876	Down	9.79e-06	0.000242443	K14430|1|1e-05|50.8|cme:CMP026C|phosphate transporter	GO:0031224//intrinsic to membrane;GO:0031224//intrinsic to membrane	GO:0015142//tricarboxylic acid transmembrane transporter activity;GO:0015142//tricarboxylic acid transmembrane transporter activity	GO:0006842//tricarboxylic acid transport;GO:0006842//tricarboxylic acid transport	gi|356559770|ref|XP_003548170.1|/0/PREDICTED: putative transporter arsB-like [Glycine max]
Glyma02g11640	1748	823	209	55.9568	14.278	-1.97052	Down	3.31e-86	5.12e-83	K13496|1|2e-110|398|ath:AT2G36780|UDP-glucosyl transferase 73C [EC:2.4.1.-]	-	GO:0016758//transferase activity, transferring hexosyl groups	-	gi|356499771|ref|XP_003518710.1|/0/PREDICTED: UDP-glycosyltransferase 73B3-like [Glycine max]
Glyma13g37020	1238	39	10	3.74402	0.964586	-1.95661	Down	2.57e-05	0.000573948	-	-	-	-	gi|388513367|gb|AFK44745.1|/1.35984e-22/unknown [Lotus japonicus]
Glyma01g41310	1681	38	10	2.68664	0.710385	-1.91913	Down	4.13e-05	0.000875441	K00261|1|0.0|833|gmx:100801250|glutamate dehydrogenase (NAD(P)+) [EC:1.4.1.3]	GO:0031090//organelle membrane;GO:0043231//intracellular membrane-bounded organelle	GO:0046914//transition metal ion binding;GO:0016639//oxidoreductase activity, acting on the CH-NH2 group of donors, NAD or NADP as acceptor;GO:0032559	GO:0006970//response to osmotic stress;GO:0019752//carboxylic acid metabolic process;GO:0010038//response to metal ion	gi|356497088|ref|XP_003517396.1|/0/PREDICTED: glutamate dehydrogenase 2-like [Glycine max]
Glyma07g11630	1187	41	11	4.10514	1.10663	-1.89125	Down	2.42e-05	0.000547325	-	-	GO:0005488//binding	-	gi|356522863|ref|XP_003530062.1|/4.64145e-65/PREDICTED: uncharacterized protein At3g17950-like [Glycine max]
Glyma20g20630	1106	40	11	4.29833	1.18768	-1.85563	Down	3.86e-05	0.000827851	K06636|1|3e-06|51.2|gmx:100791953|structural maintenance of chromosome 1	-	-	-	gi|356575194|ref|XP_003555727.1|/1.62825e-117/PREDICTED: uncharacterized protein LOC100815580 [Glycine max]
Glyma08g28770	2147	96	27	5.31415	1.50173	-1.82321	Down	2.19e-10	1.14e-08	-	-	-	-	gi|356526613|ref|XP_003531911.1|/4.07842e-127/PREDICTED: uncharacterized protein LOC100804073 [Glycine max]
Glyma10g26380	1271	46	13	4.30137	1.2214	-1.81626	Down	1.32e-05	0.000319801	-	-	-	-	gi|356575194|ref|XP_003555727.1|/7.35114e-88/PREDICTED: uncharacterized protein LOC100815580 [Glycine max]
Glyma02g07070	1597	60	17	4.4652	1.27118	-1.81256	Down	6.3e-07	1.99e-05	K08233|1|6e-70|263|ath:AT2G23610|polyneuridine-aldehyde esterase [EC:3.1.1.78]	-	-	-	gi|356498541|ref|XP_003518109.1|/7.17818e-147/PREDICTED: polyneuridine-aldehyde esterase-like [Glycine max]
Glyma15g01900	1177	46	14	4.64489	1.42041	-1.70934	Down	2.95e-05	0.00065058	K10418|1|2e-16|85.1|olu:OSTLU_39788|dynein light chain LC8-type	GO:0043231//intracellular membrane-bounded organelle;GO:0015630//microtubule cytoskeleton	GO:0003774//motor activity	GO:0048468//cell development;GO:0048513//organ development	gi|356557277|ref|XP_003546944.1|/1.72632e-52/PREDICTED: rho guanine nucleotide exchange factor 8-like [Glycine max]
Glyma05g21270	4083	54	17	1.57184	0.4972	-1.66056	Down	8.93e-06	0.000223552	-	-	-	-	gi|356511907|ref|XP_003524663.1|/0/PREDICTED: uncharacterized protein LOC100807205 [Glycine max]
Glyma10g41281	1929	63	20	3.88153	1.23811	-1.64848	Down	1.76e-06	5.1e-05	-	-	-	-	gi|356534323|ref|XP_003535706.1|/0/PREDICTED: uncharacterized protein LOC100815528 [Glycine max]
Glyma09g37030	1492	47	15	3.74389	1.20056	-1.64083	Down	4.07e-05	0.000867558	-	-	-	-	-
Glyma06g15640	4162	103	33	2.94123	0.946833	-1.63524	Down	1.1e-09	5.26e-08	K14963|1|8e-20|98.2|mtr:MTR_4g119620|COMPASS component SWD3	-	-	-	gi|356518745|ref|XP_003528038.1|/0/PREDICTED: uncharacterized protein LOC100801576 [Glycine max]
Glyma14g01110	838	56	18	7.94216	2.56502	-1.63056	Down	7.96e-06	0.000201885	-	-	-	-	gi|388499126|gb|AFK37629.1|/2.9683e-27/unknown [Lotus japonicus]
Glyma06g23950	1653	144	47	10.3534	3.39537	-1.60847	Down	1.01e-12	6.79e-11	-	-	-	-	gi|356519242|ref|XP_003528282.1|/0/PREDICTED: uncharacterized protein LOC100815083 [Glycine max]
Glyma03g25280	1320	49	16	4.41181	1.44746	-1.60784	Down	3.62e-05	0.00078082	K13422|1|6e-16|83.6|bdi:100836477|transcription factor MYC2	-	-	-	gi|356503206|ref|XP_003520402.1|/3.45123e-150/PREDICTED: transcription factor bHLH25-like [Glycine max]
Glyma10g21570	1565	76	25	5.77157	1.9076	-1.5972	Down	2.78e-07	9.38e-06	K08818|1|2e-09|62.4|vvi:100246062|cell division cycle 2-like [EC:2.7.11.22]	-	-	-	gi|356533207|ref|XP_003535158.1|/2.88693e-108/PREDICTED: uncharacterized protein LOC100802874 [Glycine max]
Glyma20g28500	2553	131	44	6.09839	2.05809	-1.56712	Down	2.55e-11	1.49e-09	-	-	-	-	gi|356575859|ref|XP_003556054.1|/2.62815e-147/PREDICTED: uncharacterized protein LOC100807906 [Glycine max]
Glyma06g48260	2504	1853	624	87.9499	29.7586	-1.56338	Down	2.37e-139	8.55e-136	K10999|1|3e-99|361|pop:POPTR_819877|cellulose synthase A [EC:2.4.1.12]	-	-	-	gi|356515422|ref|XP_003526399.1|/0/PREDICTED: cellulose synthase-like protein G1-like [Glycine max]
Glyma08g23820	3117	68	23	2.59279	0.881156	-1.55703	Down	1.87e-06	5.38e-05	K13680|1|2e-109|395|smo:SELMODRAFT_230176|beta-mannan synthase [EC:2.4.1.32]	GO:0043231//intracellular membrane-bounded organelle	GO:0046527//glucosyltransferase activity	-	gi|356523457|ref|XP_003530355.1|/0/PREDICTED: probable xyloglucan glycosyltransferase 5-like [Glycine max]
Glyma16g28630	1245	85	29	8.11417	2.78157	-1.54454	Down	1.12e-07	4.01e-06	-	-	-	-	gi|356561458|ref|XP_003548998.1|/0/PREDICTED: U-box domain-containing protein 28-like [Glycine max]
Glyma14g09670	2951	210	72	8.45755	2.91357	-1.53745	Down	7.44e-17	7.13e-15	K08653|1|7e-07|55.1|olu:OSTLU_40456|membrane-bound transcription factor site-1 protease [EC:3.4.21.112]	-	GO:0005515//protein binding;GO:0004175//endopeptidase activity	GO:0019538//protein metabolic process;GO:0044092//negative regulation of molecular function	gi|356552252|ref|XP_003544482.1|/0/PREDICTED: subtilisin-like protease-like [Glycine max]
Glyma12g10370	1325	64	22	5.74062	1.98275	-1.5337	Down	4.83e-06	0.000127683	K11228|1|2e-40|164|ota:Ot13g01170|mitogen-activated protein kinase kinase kinase [EC:2.7.11.1];K13414|2|5e-40|163|ath:AT4G08500|mitogen-activated protein kinase kinase kinase 1, plant [EC:2.7.11.25]	-	GO:0004672//protein kinase activity;GO:0000166//nucleotide binding	-	gi|356542808|ref|XP_003539857.1|/0/PREDICTED: mitogen-activated protein kinase kinase kinase A-like [Glycine max]
Glyma18g39960	1367	93	32	8.08554	2.79539	-1.53229	Down	3.38e-08	1.31e-06	K07025|1|1e-145|514|gmx:100796466|putative hydrolase of the HAD superfamily	-	GO:0003824//catalytic activity	-	gi|356567951|ref|XP_003552178.1|/2.00952e-171/PREDICTED: uncharacterized protein LOC100777400 [Glycine max]
Glyma03g29770	755	286	99	45.0208	15.6585	-1.52365	Down	3.89e-22	5.21e-20	-	-	-	-	gi|356504835|ref|XP_003521200.1|/1.53652e-45/PREDICTED: uncharacterized protein LOC100817837 [Glycine max]
Glyma15g16710	1261	104	36	9.80195	3.40917	-1.52365	Down	6e-09	2.61e-07	K00430|1|0.0|676|gmx:100798229|peroxidase [EC:1.11.1.7]	-	GO:0005506//iron ion binding;GO:0003824//catalytic activity;GO:0016209//antioxidant activity	GO:0008152//metabolic process;GO:0006950//response to stress	gi|356558221|ref|XP_003547406.1|/0/PREDICTED: peroxidase 7-like [Glycine max]
Glyma16g32740	1012	54	19	6.34173	2.24199	-1.50009	Down	3.69e-05	0.000795382	-	GO:0031224//intrinsic to membrane;GO:0031090//organelle membrane	-	-	gi|351721024|ref|NP_001235916.1|/4.62881e-100/uncharacterized protein LOC100499779 precursor [Glycine max]
Glyma09g37000	3029	68	24	2.66811	0.946179	-1.49563	Down	3.68e-06	9.99e-05	-	-	-	-	gi|356568688|ref|XP_003552542.1|/0/PREDICTED: phosphate transporter PHO1 homolog 9-like [Glycine max]
Glyma08g44720	1407	181	64	15.289	5.43185	-1.49298	Down	3.62e-14	2.78e-12	K08237|1|6e-122|436|pop:POPTR_731288|hydroquinone glucosyltransferase [EC:2.4.1.218]	-	-	-	gi|356524403|ref|XP_003530818.1|/0/PREDICTED: hydroquinone glucosyltransferase-like [Glycine max]
Glyma15g06770	740	64	23	10.2788	3.71157	-1.46957	Down	9.41e-06	0.000234303	K13449|1|1e-48|191|vvi:100258414|pathogenesis-related protein 1	-	-	-	gi|351722699|ref|NP_001237253.1|/2.0571e-95/uncharacterized protein LOC100527778 precursor [Glycine max]
Glyma01g06030	1888	119	43	7.49099	2.71974	-1.46169	Down	1.57e-09	7.33e-08	-	GO:0044464//cell part	-	-	gi|356498332|ref|XP_003518007.1|/1.98653e-122/PREDICTED: expansin-A1-like [Glycine max]
Glyma07g38780	725	68	25	11.1472	4.11778	-1.43674	Down	7.05e-06	0.000180334	-	-	-	-	gi|356521965|ref|XP_003529620.1|/7.10573e-53/PREDICTED: uncharacterized protein LOC100809917 [Glycine max]
Glyma01g35160	1500	447	165	35.4169	13.1357	-1.43094	Down	7.52e-31	1.6e-28	K11426|1|3e-47|187|osa:4344924|SET and MYND domain-containing protein	-	-	-	gi|255644430|gb|ACU22720.1|/0/unknown [Glycine max]
Glyma08g20230	2970	540	201	21.6089	8.08167	-1.4189	Down	1.75e-36	4.78e-34	K15718|1|0.0|1286|mtr:MTR_2g099570|linoleate 9S-lipoxygenase [EC:1.13.11.58]	GO:0044424//intracellular part	GO:0046914//transition metal ion binding;GO:0016702//oxidoreductase activity, acting on single donors with incorporation of molecular oxygen, incorporation of two atoms of oxygen	GO:0006633//fatty acid biosynthetic process	gi|351725145|ref|NP_001237338.1|/0/lipoxygenase-10 [Glycine max]
Glyma10g03300	1156	67	25	6.88829	2.58252	-1.41537	Down	1.04e-05	0.000256257	-	-	-	-	gi|357440711|ref|XP_003590633.1|/3.10155e-58/Ethylene receptor [Medicago truncatula]
Glyma05g26520	4752	88	33	2.2009	0.829276	-1.40817	Down	4.63e-07	1.51e-05	K13420|1|9e-155|546|ath:AT5G46330|LRR receptor-like serine/threonine-protein kinase FLS2 [EC:2.7.11.1]	GO:0016020//membrane	GO:0016491//oxidoreductase activity;GO:0004672//protein kinase activity;GO:0032559	GO:0006464//cellular protein modification process;GO:0009888//tissue development;GO:0007167//enzyme linked receptor protein signaling pathway;GO:0048229//gametophyte development	gi|356510820|ref|XP_003524132.1|/0/PREDICTED: LRR receptor-like serine/threonine-protein kinase GSO1-like [Glycine max]
Glyma07g38460	1786	648	244	43.1209	16.3144	-1.40225	Down	1.05e-42	3.91e-40	K13496|1|2e-94|344|ath:AT2G36770|UDP-glucosyl transferase 73C [EC:2.4.1.-]	-	GO:0016757//transferase activity, transferring glycosyl groups	-	gi|395343020|dbj|BAM29362.1|/0/UDP-glucosyltransferase UGT73F2 [Glycine max]
Glyma12g32390	1487	189	72	15.1059	5.78207	-1.38545	Down	2.52e-13	1.77e-11	K08235|1|5e-163|572|gmx:100801567|xyloglucan:xyloglucosyl transferase [EC:2.4.1.207]	GO:0005576//extracellular region;GO:0030312//external encapsulating structure	GO:0016798//hydrolase activity, acting on glycosyl bonds;GO:0016758//transferase activity, transferring hexosyl groups	GO:0044042//glucan metabolic process	gi|356543758|ref|XP_003540327.1|/7.6984e-172/PREDICTED: xyloglucan endotransglucosylase/hydrolase protein 9 [Glycine max]
Glyma11g11190	3292	157	60	5.66806	2.17647	-1.38086	Down	2.94e-11	1.7e-09	K10576|1|5e-48|191|vvi:100250088|ubiquitin-conjugating enzyme E2 H [EC:6.3.2.19];K13415|3|7e-37|154|osa:4324691|protein brassinosteroid insensitive 1 [EC:2.7.10.1 2.7.11.1]	GO:0031224//intrinsic to membrane;GO:0031224//intrinsic to membrane	GO:0004871//signal transducer activity;GO:0004672//protein kinase activity;GO:0016628//oxidoreductase activity, acting on the CH-CH group of donors, NAD or NADP as acceptor;GO:0032559;GO:0004871//signal transducer activity;GO:0004672//protein kinase activity;GO:0016628//oxidoreductase activity, acting on the CH-CH group of donors, NAD or NADP as acceptor;GO:0032559	GO:0006464//cellular protein modification process;GO:0007167//enzyme linked receptor protein signaling pathway;GO:0006464//cellular protein modification process;GO:0007167//enzyme linked receptor protein signaling pathway	gi|356541016|ref|XP_003538980.1|/0/PREDICTED: inactive leucine-rich repeat receptor-like serine/threonine-protein kinase At1g60630-like [Glycine max]
Glyma03g38650	2113	86	33	4.83719	1.86499	-1.375	Down	9.89e-07	3.01e-05	-	GO:0044464//cell part	-	-	gi|356505725|ref|XP_003521640.1|/0/PREDICTED: protein notum homolog [Glycine max]
Glyma11g08850	1140	226	87	23.5612	9.11331	-1.37037	Down	2.04e-15	1.74e-13	-	-	-	-	gi|356538367|ref|XP_003537675.1|/7.29876e-161/PREDICTED: uncharacterized protein LOC100777229 [Glycine max]
Glyma03g34990	2239	80	31	4.24649	1.65337	-1.36086	Down	2.85e-06	7.91e-05	-	-	-	-	gi|356503789|ref|XP_003520686.1|/0/PREDICTED: uncharacterized protein LOC100790018 [Glycine max]
Glyma02g14470	2493	69	27	3.28943	1.29331	-1.34677	Down	1.64e-05	0.000387601	K05681|1|4e-79|294|cme:CMS467C|ATP-binding cassette, subfamily G (WHITE), member 2;K12843|2|2e-54|212|vvi:100248403|U4/U6 small nuclear ribonucleoprotein PRP3;K05663|4|1e-12|73.6|ath:AT5G58270|mitochondrial ABC transporter ATM	-	GO:0017111//nucleoside-triphosphatase activity;GO:0000166//nucleotide binding;GO:0017111//nucleoside-triphosphatase activity;GO:0000166//nucleotide binding	-	gi|356502704|ref|XP_003520157.1|/0/PREDICTED: ABC transporter G family member 21-like [Glycine max]
Glyma10g27940	2162	112	44	6.15682	2.43029	-1.34106	Down	4.12e-08	1.57e-06	K09422|1|0.0|716|gmx:100782199|myb proto-oncogene protein, plant	-	-	-	gi|356534955|ref|XP_003536016.1|/0/PREDICTED: uncharacterized protein LOC100815881 [Glycine max]
Glyma05g02280	3621	76	30	2.49448	0.98936	-1.33417	Down	7.04e-06	0.000180014	K13862|1|1e-20|101|ota:Ot04g03190|solute carrier family 4 (sodium borate transporter), member 11	GO:0031224//intrinsic to membrane;GO:0031224//intrinsic to membrane	GO:0015301//anion:anion antiporter activity;GO:0015103//inorganic anion transmembrane transporter activity;GO:0015301//anion:anion antiporter activity;GO:0015103//inorganic anion transmembrane transporter activity	GO:0006820//anion transport;GO:0010035//response to inorganic substance;GO:0006820//anion transport;GO:0010035//response to inorganic substance	gi|356513461|ref|XP_003525432.1|/0/PREDICTED: probable boron transporter 2-like [Glycine max]
Glyma10g42440	1753	65	26	4.40683	1.77114	-1.31506	Down	4.05e-05	0.000863239	K03294|1|2e-45|182|sbi:SORBI_08g021380|basic amino acid/polyamine antiporter, APA family	GO:0043231//intracellular membrane-bounded organelle;GO:0031224//intrinsic to membrane	GO:0015171//amino acid transmembrane transporter activity	GO:0006865//amino acid transport;GO:0051707//response to other organism	gi|356534398|ref|XP_003535742.1|/0/PREDICTED: high affinity cationic amino acid transporter 1-like [Glycine max]
Glyma17g29320	1535	110	44	8.51684	3.42299	-1.31506	Down	8.56e-08	3.11e-06	K00430|1|2e-131|468|vvi:100261539|peroxidase [EC:1.11.1.7]	-	GO:0005506//iron ion binding;GO:0003824//catalytic activity;GO:0016209//antioxidant activity	GO:0008152//metabolic process;GO:0006950//response to stress	gi|359806759|ref|NP_001241556.1|/0/uncharacterized protein LOC100793327 precursor [Glycine max]
Glyma06g19680	1230	65	26	6.28062	2.52423	-1.31506	Down	4.05e-05	0.000862814	K09377|1|1e-94|345|vvi:100260380|cysteine and glycine-rich protein	-	GO:0046914//transition metal ion binding	-	gi|351724581|ref|NP_001235271.1|/4.07734e-112/uncharacterized protein LOC100500501 [Glycine max]
Glyma02g02680	2263	152	61	7.98277	3.2189	-1.31032	Down	3.29e-10	1.68e-08	K14638|1|8e-106|383|ppp:PHYPADRAFT_134814|solute carrier family 15 (peptide/histidine transporter), member 3/4	GO:0016020//membrane;GO:0016020//membrane	GO:0015112//nitrate transmembrane transporter activity;GO:0015112//nitrate transmembrane transporter activity	GO:0048856//anatomical structure development;GO:0015833//peptide transport;GO:0015706//nitrate transport;GO:0003006//developmental process involved in reproduction;GO:0009791//post-embryonic development;GO:0031669//cellular response to nutrient levels;GO:0048856//anatomical structure development;GO:0015833//peptide transport;GO:0015706//nitrate transport;GO:0003006//developmental process involved…	gi|356501934|ref|XP_003519778.1|/0/PREDICTED: nitrate transporter 1.7-like [Glycine max]
Glyma10g39210	2711	170	69	7.4527	3.03935	-1.294	Down	4.59e-11	2.59e-09	-	-	-	-	gi|356535997|ref|XP_003536527.1|/5.13095e-146/PREDICTED: uncharacterized protein LOC100776509 [Glycine max]
Glyma14g19010	2283	243	99	12.6501	5.17834	-1.28859	Down	4.09e-15	3.39e-13	K14638|1|2e-94|345|mtr:MTR_4g015080|solute carrier family 15 (peptide/histidine transporter), member 3/4	GO:0044464//cell part;GO:0044464//cell part	-	GO:0015833//peptide transport;GO:0006810//transport	gi|356554462|ref|XP_003545565.1|/0/PREDICTED: probable peptide transporter At1g52190-like [Glycine max]
Glyma18g43980	1732	81	33	5.55817	2.27524	-1.28859	Down	6.28e-06	0.000162661	K13496|1|6e-97|353|ath:AT2G36800|UDP-glucosyl transferase 73C [EC:2.4.1.-]	-	GO:0016757//transferase activity, transferring glycosyl groups	-	gi|356568166|ref|XP_003552284.1|/0/PREDICTED: UDP-glycosyltransferase 73B5-like [Glycine max]
Glyma18g49240	2177	3108	1267	169.675	69.4992	-1.2877	Down	6.65e-174	7.2e-170	K14329|1|6e-45|181|ath:AT5G61160|agmatine coumaroyltransferase [EC:2.3.1.64 2.3.1.-];K13065|3|2e-14|79.7|zma:100194386|shikimate O-hydroxycinnamoyltransferase [EC:2.3.1.133]	-	-	-	gi|356568640|ref|XP_003552518.1|/0/PREDICTED: agmatine coumaroyltransferase-like [Glycine max]
Glyma13g39710	1709	188	77	13.0741	5.38035	-1.28094	Down	6.38e-12	3.98e-10	K08235|1|1e-168|591|gmx:100796768|xyloglucan:xyloglucosyl transferase [EC:2.4.1.207]	GO:0005576//extracellular region;GO:0030312//external encapsulating structure	GO:0004553//hydrolase activity, hydrolyzing O-glycosyl compounds;GO:0016758//transferase activity, transferring hexosyl groups	GO:0044042//glucan metabolic process	gi|358248522|ref|NP_001240151.1|/1.79462e-167/uncharacterized protein LOC100796768 precursor [Glycine max]
Glyma11g03500	1459	212	87	17.2693	7.12075	-1.27811	Down	3.2e-13	2.23e-11	K00924|1|4e-07|54.7|aly:ARALYDRAFT_489138|[EC:2.7.1.-]	GO:0005618//cell wall	GO:0008233//peptidase activity	GO:0019538//protein metabolic process	gi|356540510|ref|XP_003538731.1|/0/PREDICTED: aspartic proteinase nepenthesin-1-like [Glycine max]
Glyma11g10760	2326	158	65	8.07313	3.33707	-1.27455	Down	3.57e-10	1.81e-08	K01179|1|2e-111|402|gmx:100814545|endoglucanase [EC:3.2.1.4]	GO:0031410//cytoplasmic vesicle	GO:0004553//hydrolase activity, hydrolyzing O-glycosyl compounds;GO:0005488//binding	GO:0044238//primary metabolic process	gi|356540986|ref|XP_003538965.1|/0/PREDICTED: endoglucanase 5-like [Glycine max]
Glyma02g12140	1594	75	31	5.592	2.32239	-1.26776	Down	1.79e-05	0.000418482	-	GO:0044464//cell part	-	-	gi|358248428|ref|NP_001240136.1|/4.36421e-128/expansin-A1-like precursor [Glycine max]
Glyma08g37240	1526	136	58	10.592	4.53874	-1.22261	Down	1.81e-08	7.31e-07	K13422|1|7e-10|63.9|pop:POPTR_676550|transcription factor MYC2	GO:0043231//intracellular membrane-bounded organelle	GO:0001071//nucleic acid binding transcription factor activity	-	gi|356526733|ref|XP_003531971.1|/2.49542e-149/PREDICTED: transcription factor bHLH93-like isoform 1 [Glycine max]
Glyma13g40450	2383	96	41	4.78786	2.05457	-1.22054	Down	2.39e-06	6.74e-05	K14638|1|4e-86|317|ppp:PHYPADRAFT_189464|solute carrier family 15 (peptide/histidine transporter), member 3/4	GO:0016020//membrane	-	GO:0006810//transport	gi|356550204|ref|XP_003543478.1|/0/PREDICTED: probable nitrate excretion transporter 2-like [Glycine max]
Glyma19g35270	4622	3223	1377	82.8752	35.5767	-1.22001	Down	8.37e-166	7.25e-162	K05681|1|4e-51|202|cme:CMS467C|ATP-binding cassette, subfamily G (WHITE), member 2;K12843|3|9e-46|184|vvi:100248403|U4/U6 small nuclear ribonucleoprotein PRP3	GO:0031224//intrinsic to membrane	GO:0017111//nucleoside-triphosphatase activity;GO:0015604//organic phosphonate transmembrane transporter activity;GO:0032559	GO:0009207;GO:0051234//establishment of localization	gi|356570682|ref|XP_003553514.1|/0/PREDICTED: pleiotropic drug resistance protein 1-like [Glycine max]
Glyma05g34830	1100	105	45	11.3446	4.88519	-1.21553	Down	8.69e-07	2.67e-05	K01051|1|3e-12|71.2|rcu:RCOM_0417480|pectinesterase [EC:3.1.1.11];K02355|5|1e-10|65.5|vvi:100257414|elongation factor G	-	GO:0004091//carboxylesterase activity;GO:0004857//enzyme inhibitor activity	-	gi|356513076|ref|XP_003525240.1|/3.60575e-109/PREDICTED: 21 kDa protein-like [Glycine max]
Glyma14g03300	3961	100	43	3.00047	1.29636	-1.21072	Down	1.71e-06	4.96e-05	K00696|1|0.0|1995|gmx:100806543|sucrose-phosphate synthase [EC:2.4.1.14]	-	GO:0035251//UDP-glucosyltransferase activity	GO:0005984//disaccharide metabolic process	gi|356553609|ref|XP_003545147.1|/0/PREDICTED: probable sucrose-phosphate synthase 2-like [Glycine max]
Glyma02g11711	2133	239	103	13.3168	5.76644	-1.2075	Down	1.36e-13	9.92e-12	K13496|1|5e-101|367|ath:AT2G36780|UDP-glucosyl transferase 73C [EC:2.4.1.-]	-	GO:0016758//transferase activity, transferring hexosyl groups;GO:0016758//transferase activity, transferring hexosyl groups	-	gi|356499781|ref|XP_003518715.1|/0/PREDICTED: UDP-glycosyltransferase 73B3-like [Glycine max]
Glyma15g05150	2960	160	69	6.42425	2.78368	-1.20654	Down	1.49e-09	6.97e-08	K00889|1|0.0|1145|gmx:100789949|1-phosphatidylinositol-4-phosphate 5-kinase [EC:2.7.1.68]	GO:0016020//membrane;GO:0016020//membrane;GO:0016020//membrane;GO:0016020//membrane;GO:0016020//membrane	GO:0016307//phosphatidylinositol phosphate kinase activity;GO:0016307//phosphatidylinositol phosphate kinase activity;GO:0016307//phosphatidylinositol phosphate kinase activity;GO:0016307//phosphatidylinositol phosphate kinase activity;GO:0016307//phosphatidylinositol phosphate kinase activity	GO:0046488//phosphatidylinositol metabolic process;GO:0006796//phosphate-containing compound metabolic process;GO:0046488//phosphatidylinositol metabolic process;GO:0006796//phosphate-containing compound metabolic process;GO:0046488//phosphatidylinositol metabolic process;GO:0006796//phosphate-containing compound metabolic process;GO:0046488//phosphatidylinositol metabolic process;GO:0006796//pho…	gi|356557497|ref|XP_003547052.1|/0/PREDICTED: phosphatidylinositol-4-phosphate 5-kinase 8-like [Glycine max]
Glyma15g39090	2324	305	132	15.5976	6.78265	-1.2014	Down	8.12e-17	7.73e-15	K15639|1|1e-51|140|ath:AT2G26710|cytochrome P450, family 734, subfamily A, polypeptide 1 (PHYB activation tagged suppressor 1) [EC:1.14.-.-]	-	GO:0016491//oxidoreductase activity;GO:0005506//iron ion binding;GO:0016491//oxidoreductase activity;GO:0005506//iron ion binding	GO:0008152//metabolic process	gi|85001703|gb|ABC68405.1|/0/cytochrome P450 monooxygenase CYP72A68 [Glycine max]
Glyma04g02580	1906	314	136	19.5795	8.52074	-1.20029	Down	3.02e-17	3.04e-15	-	GO:0031224//intrinsic to membrane	-	GO:0009607//response to biotic stimulus	gi|356509626|ref|XP_003523547.1|/1.67123e-177/PREDICTED: thaumatin-like protein 1-like [Glycine max]
Glyma08g25950	2060	2300	997	132.695	57.7949	-1.1991	Down	9.92e-116	2.53e-112	K15638|1|6e-121|433|ath:AT1G17060|cytochrome P450, family 72, subfamily C, polypeptide 1;K15639|3|6e-113|406|aly:ARALYDRAFT_901457|cytochrome P450, family 734, subfamily A, polypeptide 1 (PHYB activation tagged suppressor 1) [EC:1.14.-.-];K10717|5|1e-83|309|pop:POPTR_743744|cytokinin trans-hydroxylase	-	GO:0016491//oxidoreductase activity;GO:0005506//iron ion binding;GO:0016491//oxidoreductase activity;GO:0005506//iron ion binding	GO:0008152//metabolic process;GO:0008152//metabolic process	gi|356526435|ref|XP_003531823.1|/0/PREDICTED: secologanin synthase-like isoform 1 [Glycine max]
Glyma07g34010	1589	124	54	9.27454	4.05818	-1.19244	Down	1.37e-07	4.87e-06	-	GO:0016020//membrane	-	GO:0051707//response to other organism	gi|356575554|ref|XP_003555905.1|/3.97339e-89/PREDICTED: uncharacterized protein At1g66480-like [Glycine max]
Glyma17g13550	1824	87	38	5.66877	2.48783	-1.18815	Down	1.11e-05	0.000272484	K01728|1|1e-177|620|gmx:100101868|pectate lyase [EC:4.2.2.2]	-	GO:0016837;GO:0003824//catalytic activity	-	gi|356563159|ref|XP_003549832.1|/0/PREDICTED: probable pectate lyase 22 isoform 1 [Glycine max]
Glyma02g12470	2535	260	114	12.1896	5.37017	-1.18261	Down	3.13e-14	2.41e-12	-	-	-	-	gi|356502579|ref|XP_003520096.1|/0/PREDICTED: uncharacterized protein LOC100798811 [Glycine max]
Glyma02g31490	2348	82	36	4.15059	1.83091	-1.18076	Down	2.2e-05	0.000501884	K13412|1|0.0|868|gmx:100790745|calcium-dependent protein kinase [EC:2.7.11.1]	-	GO:0046872//metal ion binding;GO:0004674//protein serine/threonine kinase activity;GO:0032559;GO:0046872//metal ion binding;GO:0004674//protein serine/threonine kinase activity;GO:0032559	GO:0006464//cellular protein modification process;GO:0006464//cellular protein modification process	gi|356498553|ref|XP_003518115.1|/0/PREDICTED: calcium-dependent protein kinase 32-like [Glycine max]
Glyma04g35710	3664	412	182	13.364	5.93168	-1.17184	Down	2.21e-21	2.78e-19	K13862|1|8e-12|65.5|ota:Ot04g03190|solute carrier family 4 (sodium borate transporter), member 11	GO:0031224//intrinsic to membrane;GO:0031224//intrinsic to membrane	GO:0015301//anion:anion antiporter activity;GO:0015301//anion:anion antiporter activity	GO:0006811//ion transport;GO:0006811//ion transport	gi|356508679|ref|XP_003523082.1|/0/PREDICTED: probable boron transporter 2-like [Glycine max]
Glyma10g32640	2046	270	120	15.6838	7.00386	-1.16306	Down	2.24e-14	1.75e-12	-	GO:0016020//membrane	GO:0016899//oxidoreductase activity, acting on the CH-OH group of donors, oxygen as acceptor	GO:0006950//response to stress;GO:0044281//small molecule metabolic process	gi|356533767|ref|XP_003535431.1|/0/PREDICTED: long-chain-alcohol oxidase FAO1-like [Glycine max]
Glyma02g06140	357	83	37	27.6315	12.3764	-1.15872	Down	2.6e-05	0.00058001	-	-	-	-	gi|351721573|ref|NP_001236190.1|/6.04107e-64/uncharacterized protein LOC100527189 [Glycine max]
Glyma14g13320	2861	103	46	4.27872	1.92	-1.15607	Down	2.85e-06	7.9e-05	K14491|1|0.0|1301|gmx:100803879|two-component response regulator ARR-B family	-	-	-	gi|356554201|ref|XP_003545437.1|/0/PREDICTED: LOW QUALITY PROTEIN: two-component response regulator ARR12-like [Glycine max]
Glyma09g41670	2470	89	40	4.2824	1.93386	-1.14694	Down	1.55e-05	0.000369099	K13424|1|4e-127|453|pop:POPTR_577093|WRKY transcription factor 33	-	-	-	gi|356532213|ref|XP_003534668.1|/0/PREDICTED: probable WRKY transcription factor 33-like [Glycine max]
Glyma11g35560	525	89	40	20.1477	9.09834	-1.14694	Down	1.55e-05	0.000369302	-	-	-	-	gi|356539997|ref|XP_003538478.1|/1.16998e-96/PREDICTED: uncharacterized protein LOC100805413 [Glycine max]
Glyma17g14470	2274	91	41	4.75604	2.15305	-1.14338	Down	1.3e-05	0.000316578	-	-	GO:0005488//binding	-	gi|356565319|ref|XP_003550889.1|/0/PREDICTED: uncharacterized protein LOC100785216 [Glycine max]
Glyma13g07200	2034	141	64	8.23877	3.75743	-1.13268	Down	6.87e-08	2.53e-06	-	-	-	-	gi|356545647|ref|XP_003541248.1|/0/PREDICTED: uncharacterized protein LOC100815059 [Glycine max]
Glyma10g42870	1536	480	218	37.1402	16.9483	-1.13184	Down	2.09e-23	2.99e-21	K09838|1|3e-17|88.2|ath:AT5G67030|zeaxanthin epoxidase [EC:1.14.13.90]	-	GO:0016491//oxidoreductase activity	GO:0008152//metabolic process	gi|356536384|ref|XP_003536718.1|/0/PREDICTED: 6-hydroxynicotinate 3-monooxygenase-like [Glycine max]
Glyma19g05760	1606	288	131	21.3128	9.74064	-1.12964	Down	1.31e-14	1.04e-12	-	-	-	-	gi|356573657|ref|XP_003554974.1|/0/PREDICTED: uncharacterized protein LOC100817694 [Glycine max]
Glyma15g05710	2278	224	102	11.6866	5.34697	-1.12806	Down	1.16e-11	7.02e-10	K13496|1|3e-31|135|ath:AT2G36800|UDP-glucosyl transferase 73C [EC:2.4.1.-]	-	GO:0016757//transferase activity, transferring glycosyl groups;GO:0016757//transferase activity, transferring glycosyl groups	-	gi|356558606|ref|XP_003547595.1|/0/PREDICTED: UDP-glycosyltransferase 91A1-like [Glycine max]
Glyma19g21600	2061	120	55	6.91987	3.18674	-1.11866	Down	8.46e-07	2.61e-05	K07088|1|1e-44|179|rcu:RCOM_0875040|	GO:0031224//intrinsic to membrane	-	GO:0060918//auxin transport	gi|356571384|ref|XP_003553857.1|/0/PREDICTED: uncharacterized protein LOC100795484 [Glycine max]
Glyma04g33010	2105	368	169	20.7773	9.5873	-1.11582	Down	6.32e-18	6.65e-16	-	-	-	-	gi|356508523|ref|XP_003523005.1|/1.18742e-155/PREDICTED: uncharacterized protein LOC100797246 [Glycine max]
Glyma16g08370	2256	135	62	7.11196	3.28182	-1.11575	Down	1.84e-07	6.4e-06	K05681|1|2e-77|289|cme:CMS467C|ATP-binding cassette, subfamily G (WHITE), member 2;K12843|2|3e-59|228|vvi:100248403|U4/U6 small nuclear ribonucleoprotein PRP3;K05663|4|1e-14|80.5|rcu:RCOM_0261010|mitochondrial ABC transporter ATM	GO:0044464//cell part	GO:0017111//nucleoside-triphosphatase activity;GO:0015604//organic phosphonate transmembrane transporter activity;GO:0032559	GO:0009207	gi|356558898|ref|XP_003547739.1|/0/PREDICTED: ABC transporter G family member 14-like [Glycine max]
Glyma09g04560	2634	252	116	11.3705	5.25901	-1.11243	Down	1.1e-12	7.4e-11	K01184|1|5e-22|105|ath:AT3G15720|polygalacturonase [EC:3.2.1.15]	-	GO:0004553//hydrolase activity, hydrolyzing O-glycosyl compounds	GO:0044238//primary metabolic process;GO:0045229//external encapsulating structure organization	gi|356529330|ref|XP_003533248.1|/0/PREDICTED: probable polygalacturonase-like [Glycine max]
Glyma17g36513	1725	89	41	6.1319	2.83829	-1.11131	Down	2.52e-05	0.000566569	K04733|1|3e-66|251|smo:SELMODRAFT_159261|interleukin-1 receptor-associated kinase 4 [EC:2.7.11.1];K05658|4|9e-51|199|vvi:100262734|ATP-binding cassette, subfamily B (MDR/TAP), member 1;K13416|5|3e-50|198|ath:AT4G33430|brassinosteroid insensitive 1-associated receptor kinase 1 [EC:2.7.10.1 2.7.11.1]	-	GO:0004672//protein kinase activity	-	gi|356564225|ref|XP_003550356.1|/0/PREDICTED: uncharacterized protein LOC100779310 [Glycine max]
Glyma08g05490	2182	202	94	11.0025	5.1444	-1.09676	Down	3.04e-10	1.55e-08	-	-	GO:0016740//transferase activity	-	gi|356527872|ref|XP_003532530.1|/0/PREDICTED: uncharacterized glycosyltransferase AGO61-like [Glycine max]
Glyma08g10410	2202	88	41	4.74963	2.22345	-1.09501	Down	3.48e-05	0.000753381	K08150|1|0.0|1061|gmx:100803185|MFS transporter, SP family, solute carrier family 2 (myo-inositol transporter), member 13	GO:0031224//intrinsic to membrane;GO:0042995//cell projection	GO:0005365//myo-inositol transmembrane transporter activity	GO:0015791//polyol transport	gi|356525098|ref|XP_003531164.1|/0/PREDICTED: probable inositol transporter 2-like isoform 1 [Glycine max]
Glyma01g31921	2354	170	80	8.58296	4.05831	-1.0806	Down	1.16e-08	4.86e-07	K13424|1|1e-118|425|vvi:100243352|WRKY transcription factor 33	-	-	-	gi|356495083|ref|XP_003516410.1|/0/PREDICTED: probable WRKY transcription factor 33 [Glycine max]
Glyma13g32310	905	276	130	36.2456	17.1536	-1.07929	Down	3.61e-13	2.5e-11	K03809|1|5e-78|289|gmx:100789057|Trp repressor binding protein	GO:0016020//membrane	-	-	gi|356549433|ref|XP_003543098.1|/1.74588e-92/PREDICTED: flavoprotein wrbA-like [Glycine max]
Glyma07g17230	1594	127	60	9.46912	4.49495	-1.07493	Down	9.29e-07	2.84e-05	-	-	GO:0005488//binding	-	gi|356520975|ref|XP_003529134.1|/0/PREDICTED: L-type lectin-domain containing receptor kinase IV.4-like [Glycine max]
Glyma14g36920	1359	97	46	8.48295	4.04203	-1.06948	Down	1.99e-05	0.000459995	K13148|1|5e-07|53.9|vvi:100261060|integrator complex subunit 11 [EC:3.1.27.-];K15692|2|9e-07|53.1|gmx:100793048|E3 ubiquitin-protein ligase RNF13 [EC:6.3.2.19];K11982|4|1e-06|52.4|gmx:100787523|E3 ubiquitin-protein ligase RNF115/126 [EC:6.3.2.19];K10601|5|1e-06|52.4|zma:100217233|E3 ubiquitin-protein ligase synoviolin [EC:6.3.2.19]	-	GO:0046914//transition metal ion binding;GO:0046914//transition metal ion binding	GO:0009725//response to hormone stimulus;GO:0006970//response to osmotic stress;GO:0009743//response to carbohydrate stimulus;GO:0006714//sesquiterpenoid metabolic process;GO:0009725//response to hormone stimulus;GO:0006970//response to osmotic stress;GO:0009743//response to carbohydrate stimulus;GO:0006714//sesquiterpenoid metabolic process	gi|351720999|ref|NP_001236683.1|/4.40731e-78/uncharacterized protein LOC100305532 [Glycine max]
Glyma17g02680	2815	267	127	11.2727	5.38749	-1.06514	Down	1.52e-12	1e-10	K15450|1|5e-19|95.1|gmx:100816336|tRNA wybutosine-synthesizing protein 3 [EC:2.1.1.-]	GO:0044444//cytoplasmic part	-	-	gi|356563867|ref|XP_003550179.1|/0/PREDICTED: acyl-CoA-binding domain-containing protein 4-like [Glycine max]
Glyma16g28080	4456	1549	737	41.3143	19.7508	-1.06473	Down	3.31e-65	2.56e-62	K10999|1|0.0|1795|gmx:100806786|cellulose synthase A [EC:2.4.1.12]	GO:0031224//intrinsic to membrane;GO:0031224//intrinsic to membrane	GO:0016759//cellulose synthase activity;GO:0046914//transition metal ion binding;GO:0016759//cellulose synthase activity;GO:0046914//transition metal ion binding	GO:0045229//external encapsulating structure organization;GO:0009250//glucan biosynthetic process;GO:0045229//external encapsulating structure organization;GO:0009250//glucan biosynthetic process	gi|356559631|ref|XP_003548102.1|/0/PREDICTED: cellulose synthase A catalytic subunit 6 [UDP-forming]-like [Glycine max]
Glyma20g23400	1763	262	126	17.6621	8.53453	-1.04928	Down	4.48e-12	2.87e-10	K00924|1|2e-26|119|aly:ARALYDRAFT_489138|[EC:2.7.1.-];K08245|3|2e-06|52.4|pop:POPTR_833956|phytepsin [EC:3.4.23.40]	-	GO:0004175//endopeptidase activity	GO:0019538//protein metabolic process	gi|356575389|ref|XP_003555824.1|/0/PREDICTED: aspartic proteinase nepenthesin-1-like [Glycine max]
Glyma15g20970	1106	274	132	29.4435	14.2521	-1.04677	Down	1.61e-12	1.06e-10	K15441|1|2e-08|57.8|ppp:PHYPADRAFT_86831|tRNA-specific adenosine deaminase 2 [EC:3.5.4.-]	-	GO:0003824//catalytic activity;GO:0046914//transition metal ion binding;GO:0016814//hydrolase activity, acting on carbon-nitrogen (but not peptide) bonds, in cyclic amidines;GO:0046914//transition metal ion binding	-	gi|351721430|ref|NP_001236185.1|/1.16092e-99/uncharacterized protein LOC100305493 [Glycine max]
Glyma19g01630	2306	161	78	8.29776	4.03921	-1.03865	Down	7.66e-08	2.8e-06	K08332|1|8e-15|80.9|vcn:VOLCADRAFT_41528|vacuolar protein 8	-	-	-	gi|356573406|ref|XP_003554852.1|/0/PREDICTED: U-box domain-containing protein 40-like [Glycine max]
Glyma12g30210	2252	103	50	5.4358	2.65133	-1.03578	Down	1.84e-05	0.000429983	-	GO:0043231//intracellular membrane-bounded organelle;GO:0043231//intracellular membrane-bounded organelle	GO:0008194//UDP-glycosyltransferase activity;GO:0008194//UDP-glycosyltransferase activity	GO:0009832//plant-type cell wall biogenesis;GO:0010413//glucuronoxylan metabolic process;GO:0009832//plant-type cell wall biogenesis;GO:0010413//glucuronoxylan metabolic process	gi|356541948|ref|XP_003539434.1|/0/PREDICTED: probable glucuronoxylan glucuronosyltransferase IRX7-like [Glycine max]
Glyma05g28310	1500	841	412	66.6345	32.7995	-1.02259	Down	5.48e-34	1.33e-31	K08235|1|4e-144|509|gmx:100499905|xyloglucan:xyloglucosyl transferase [EC:2.4.1.207]	GO:0005576//extracellular region;GO:0030312//external encapsulating structure	GO:0016798//hydrolase activity, acting on glycosyl bonds;GO:0016758//transferase activity, transferring hexosyl groups	GO:0044042//glucan metabolic process	gi|356512423|ref|XP_003524918.1|/4.41919e-167/PREDICTED: brassinosteroid-regulated protein BRU1-like [Glycine max]
Glyma20g02500	2617	214	105	9.71862	4.79123	-1.02035	Down	9.9e-10	4.75e-08	-	-	-	-	gi|356576393|ref|XP_003556316.1|/0/PREDICTED: uncharacterized protein LOC100816119 isoform 1 [Glycine max]
Glyma14g34500	795	249	123	37.2243	18.4756	-1.01062	Down	6.08e-11	3.38e-09	-	-	-	-	gi|356552868|ref|XP_003544784.1|/7.92605e-152/PREDICTED: ser/Thr-rich protein T10 in DGCR region-like [Glycine max]
Glyma20g37340	2641	107	53	4.81515	2.39645	-1.00668	Down	2e-05	0.000460607	K10406|1|7e-66|250|sbi:SORBI_01g049720|kinesin family member C2/C3	-	GO:0003774//motor activity;GO:0000166//nucleotide binding	-	gi|356574910|ref|XP_003555586.1|/0/PREDICTED: kinesin-1-like [Glycine max]
Glyma01g42160	3283	109	54	3.94594	1.96419	-1.00643	Down	1.68e-05	0.000395383	-	-	GO:0005488//binding	-	gi|356495623|ref|XP_003516674.1|/0/PREDICTED: uncharacterized protein LOC100802491 [Glycine max]
Glyma09g26650	2496	129	64	6.14242	3.06194	-1.00436	Down	2.91e-06	8.03e-05	-	-	GO:0016741	GO:0006730//one-carbon metabolic process	gi|356529267|ref|XP_003533217.1|/0/PREDICTED: probable methyltransferase PMT16-like [Glycine max]
Glyma0024s00230	2158	139	69	7.65522	3.8182	-1.00355	Down	1.22e-06	3.63e-05	K11982|1|1e-173|608|gmx:100787242|E3 ubiquitin-protein ligase RNF115/126 [EC:6.3.2.19]	-	GO:0046872//metal ion binding;GO:0046872//metal ion binding;GO:0046872//metal ion binding	-	gi|356577672|ref|XP_003556948.1|/1.46391e-172/PREDICTED: E3 ubiquitin-protein ligase RING1-like isoform 1 [Glycine max]
Glyma16g34220	2309	189	94	9.72819	4.86145	-1.00079	Down	1.6e-08	6.53e-07	K08202|1|8e-32|137|cre:CHLREDRAFT_103526|MFS transporter, OCT family, solute carrier family 22 (organic cation transporter), member 4/5	GO:0016020//membrane;GO:0016020//membrane	GO:0015171//amino acid transmembrane transporter activity;GO:0015171//amino acid transmembrane transporter activity	GO:0006865//amino acid transport;GO:0006865//amino acid transport	gi|356560049|ref|XP_003548308.1|/0/PREDICTED: solute carrier family 22 member 3-like isoform 1 [Glycine max]

## Sheet: CK-0.5hR-VS-USDA205-0.5hR.GeneD
Table S3:The information data of the DEGs in the 15 comparisons - CK-0.5hR vs USDA205-0.5hR
GeneID	Gene_length	CK-0.5hR-Expression	USDA205-0.5hR-Expression	CK-0.5hR-RPKM	USDA205-0.5hR-RPKM	log2 Ratio(USDA205-0.5hR/CK-0.5hR)	Up-Down-Regulation(USDA205-0.5hR/CK-0.5hR)	P-value	FDR	KEGG Orthology	GO Component	GO Function	GO Process	Blast nr
Glyma03g32830	772	0	17	0.01	2.55665	7.99811	Up	9.4e-06	0.000133607	-	-	-	-	gi|255645809|gb|ACU23395.1|/8.86431e-28/unknown [Glycine max]
Glyma11g15631	1023	0	15	0.01	1.70238	7.41141	Up	3.68e-05	0.000451109	-	-	-	-	-
Glyma04g06470	1222	0	15	0.01	1.42515	7.15497	Up	3.68e-05	0.000451236	K13424|1|6e-18|90.1|vvi:100243352|WRKY transcription factor 33	-	-	-	gi|356509880|ref|XP_003523671.1|/5.14004e-144/PREDICTED: LOW QUALITY PROTEIN: probable WRKY transcription factor 40-like [Glycine max]
Glyma09g35011	5148	1	32	0.0230864	0.721691	4.96627	Up	5.91e-09	1.48e-07	K13428|1|8e-149|527|aly:ARALYDRAFT_488953|LRR receptor-like serine/threonine-protein kinase EFR [EC:2.7.11.1];K13420|3|1e-134|480|pop:POPTR_1075175|LRR receptor-like serine/threonine-protein kinase FLS2 [EC:2.7.11.1]	-	-	-	gi|356529793|ref|XP_003533472.1|/0/PREDICTED: probable LRR receptor-like serine/threonine-protein kinase At3g47570-like [Glycine max]
Glyma08g04750	986	1	22	0.120536	2.59051	4.4257	Up	3.85e-06	5.96e-05	-	-	-	-	-
Glyma07g18280	1486	16	255	1.27966	19.9233	3.96062	Up	1.25e-55	3.2e-53	K05277|1|3e-65|247|pop:POPTR_646527|leucoanthocyanidin dioxygenase [EC:1.14.11.19]	-	GO:0016491//oxidoreductase activity	GO:0008152//metabolic process	gi|356521024|ref|XP_003529158.1|/0/PREDICTED: leucoanthocyanidin dioxygenase-like [Glycine max]
Glyma02g43470	485	2	28	0.490098	6.7028	3.77362	Up	6.34e-07	1.16e-05	-	-	-	-	gi|357493377|ref|XP_003616977.1|/1.95432e-14/hypothetical protein MTR_5g086360 [Medicago truncatula]
Glyma04g05500	2107	2	27	0.112813	1.48778	3.72115	Up	1.18e-06	2.02e-05	-	GO:0043231//intracellular membrane-bounded organelle;GO:0043231//intracellular membrane-bounded organelle;GO:0043231//intracellular membrane-bounded organelle	GO:0003677//DNA binding;GO:0003677//DNA binding;GO:0003677//DNA binding	GO:0009642//response to light intensity;GO:0000302//response to reactive oxygen species;GO:0009743//response to carbohydrate stimulus;GO:0009408//response to heat;GO:0006351//transcription, DNA-dependent;GO:0006986//response to unfolded protein;GO:0009642//response to light intensity;GO:0000302//response to reactive oxygen species;GO:0009743//response to carbohydrate stimulus;GO:0009408//response…	gi|402715725|gb|AFQ93676.1|/0/heat shock transcription factor HSFA2 [Glycine max]
Glyma14g33940	555	3	36	0.642425	7.53094	3.55123	Up	2.89e-08	6.58e-07	-	-	-	-	gi|357489305|ref|XP_003614940.1|/2.23774e-11/hypothetical protein MTR_5g061550 [Medicago truncatula]
Glyma08g07130	1595	2	22	0.149027	1.60141	3.4257	Up	2.48e-05	0.000318471	K12930|1|3e-106|384|rcu:RCOM_1324500|anthocyanidin 3-O-glucosyltransferase [EC:2.4.1.115];K10757|3|4e-98|357|ath:AT5G17050|flavonol 3-O-glucosyltransferase [EC:2.4.1.91]	-	GO:0016740//transferase activity	-	gi|358248090|ref|NP_001240066.1|/0/kaempferol 3-O-beta-D-galactosyltransferase-like [Glycine max]
Glyma03g07680	1563	20	216	1.52078	16.0448	3.39923	Up	5.54e-42	1.02e-39	K05277|1|3e-48|191|mtr:MTR_5g011250|leucoanthocyanidin dioxygenase [EC:1.14.11.19];K06892|4|5e-46|183|pop:POPTR_550478|	-	GO:0046914//transition metal ion binding;GO:0016706//oxidoreductase activity, acting on paired donors, with incorporation or reduction of molecular oxygen, 2-oxoglutarate as one donor, and incorporation of one atom each of oxygen into both donors;GO:0016701//oxidoreductase activity, acting on single donors with incorporation of molecular oxygen;GO:0016491//oxidoreductase activity	GO:0008152//metabolic process	gi|356503301|ref|XP_003520449.1|/0/PREDICTED: leucoanthocyanidin dioxygenase-like [Glycine max]
Glyma10g35710	1490	5	52	0.398821	4.05188	3.34478	Up	6.12e-11	1.94e-09	-	-	-	-	gi|357443379|ref|XP_003591967.1|/2.66692e-39/hypothetical protein MTR_1g095730 [Medicago truncatula]
Glyma01g24115	1109	2	20	0.214335	2.09381	3.28819	Up	8.25e-05	0.000925645	-	-	-	-	gi|449445762|ref|XP_004140641.1|/1.58516e-10/PREDICTED: proton pump-interactor 1-like [Cucumis sativus]
Glyma20g31820	1307	3	26	0.272797	2.3096	3.08174	Up	1.12e-05	0.000156286	-	-	-	-	gi|357443379|ref|XP_003591967.1|/2.09188e-45/hypothetical protein MTR_1g095730 [Medicago truncatula]
Glyma13g40501	681	10	81	1.74521	13.8095	2.98419	Up	7.64e-15	3.63e-13	-	-	-	-	-
Glyma10g01380	1540	41	325	3.16415	24.502	2.95301	Up	8.66e-55	2.15e-52	K04125|1|1e-91|335|pop:POPTR_550316|gibberellin 2-oxidase [EC:1.14.11.13]	-	GO:0046914//transition metal ion binding;GO:0016706//oxidoreductase activity, acting on paired donors, with incorporation or reduction of molecular oxygen, 2-oxoglutarate as one donor, and incorporation of one atom each of oxygen into both donors;GO:0016701//oxidoreductase activity, acting on single donors with incorporation of molecular oxygen	GO:0008152//metabolic process	gi|356536677|ref|XP_003536863.1|/0/PREDICTED: gibberellin 2-beta-dioxygenase 2-like [Glycine max]
Glyma05g02760	1741	6	46	0.409588	3.0676	2.90487	Up	9.37e-09	2.28e-07	K00517|1|8e-106|382|ath:AT3G26190|[EC:1.14.-.-]	GO:0031224//intrinsic to membrane	GO:0016491//oxidoreductase activity;GO:0005506//iron ion binding	GO:0008152//metabolic process	gi|358248834|ref|NP_001239692.1|/0/cytochrome P450 71A9 precursor [Glycine max]
Glyma05g32040	1865	65	476	4.14218	29.6325	2.83872	Up	2.19e-76	1.08e-73	K09286|1|3e-27|121|ath:AT1G43160|EREBP-like factor	-	-	GO:0009737//response to abscisic acid stimulus;GO:0050794//regulation of cellular process;GO:0006950//response to stress	gi|255639269|gb|ACU19933.1|/7.26122e-85/unknown [Glycine max]
Glyma03g01835	1204	5	36	0.493558	3.47149	2.81426	Up	6.45e-07	1.18e-05	-	-	-	-	gi|356506294|ref|XP_003521920.1|/4.55381e-92/PREDICTED: BON1-associated protein 2-like [Glycine max]
Glyma02g03280	1641	94	656	6.80791	46.4125	2.76923	Up	5.84e-102	4.44e-99	-	-	-	-	gi|255640859|gb|ACU20712.1|/1.21949e-56/unknown [Glycine max]
Glyma03g22230	1702	27	186	1.88538	12.688	2.75054	Up	7.86e-30	9.25e-28	K08286|1|1e-59|229|ath:AT5G47750|protein-serine/threonine kinase [EC:2.7.11.-];K08282|3|9e-56|216|ath:AT3G45780|non-specific serine/threonine protein kinase [EC:2.7.11.1]	-	GO:0004672//protein kinase activity;GO:0019900//kinase binding	-	gi|356503073|ref|XP_003520336.1|/0/PREDICTED: serine/threonine-protein kinase OXI1-like [Glycine max]
Glyma13g36250	848	5	34	0.700759	4.65503	2.7318	Up	1.97e-06	3.22e-05	K03671|1|8e-21|99.0|ppp:PHYPADRAFT_185663|thioredoxin 1	-	GO:0015036//disulfide oxidoreductase activity	GO:0018904;GO:0019725//cellular homeostasis	gi|351722817|ref|NP_001237001.1|/4.7855e-57/uncharacterized protein LOC100499858 [Glycine max]
Glyma08g15840	1161	4	27	0.40947	2.70005	2.72115	Up	2.56e-05	0.000326806	K01213|1|3e-81|300|pop:POPTR_552472|galacturan 1,4-alpha-galacturonidase [EC:3.2.1.67];K01184|2|8e-79|292|pop:POPTR_763686|polygalacturonase [EC:3.2.1.15]	-	GO:0016798//hydrolase activity, acting on glycosyl bonds	GO:0008152//metabolic process	gi|356528552|ref|XP_003532865.1|/0/PREDICTED: polygalacturonase-like [Glycine max]
Glyma02g05450	1511	9	60	0.707901	4.61027	2.70323	Up	2.36e-10	6.97e-09	K00475|1|0.0|742|gmx:732548|naringenin 3-dioxygenase [EC:1.14.11.9]	-	GO:0016706//oxidoreductase activity, acting on paired donors, with incorporation or reduction of molecular oxygen, 2-oxoglutarate as one donor, and incorporation of one atom each of oxygen into both donors;GO:0016706//oxidoreductase activity, acting on paired donors, with incorporation or reduction of molecular oxygen, 2-oxoglutarate as one donor, and incorporation of one atom each of oxygen into…	GO:0008152//metabolic process;GO:0008152//metabolic process	gi|351724303|ref|NP_001236797.1|/0/flavanone 3-hydroxylase [Glycine max]
Glyma16g09850	1594	11	73	0.82016	5.31709	2.69666	Up	2.69e-12	1.01e-10	K08286|1|3e-53|207|aly:ARALYDRAFT_494187|protein-serine/threonine kinase [EC:2.7.11.-];K08282|3|3e-49|194|ota:Ot16g02900|non-specific serine/threonine protein kinase [EC:2.7.11.1]	-	GO:0004672//protein kinase activity;GO:0019900//kinase binding	-	gi|356560695|ref|XP_003548625.1|/0/PREDICTED: serine/threonine-protein kinase OXI1-like [Glycine max]
Glyma13g27680	1822	43	274	2.80488	17.4599	2.63803	Up	2.23e-41	3.97e-39	K15283|1|0.0|721|gmx:100804205|solute carrier family 35, member E1	GO:0031224//intrinsic to membrane;GO:0031090//organelle membrane	GO:0015291//secondary active transmembrane transporter activity;GO:0015119;GO:0005342//organic acid transmembrane transporter activity	GO:0009642//response to light intensity;GO:0051707//response to other organism;GO:0009746;GO:0015712//hexose phosphate transport;GO:0015711//organic anion transport;GO:0015717//triose phosphate transport;GO:0019953//sexual reproduction;GO:0034285;GO:0015979//photosynthesis	gi|356548981|ref|XP_003542877.1|/0/PREDICTED: glucose-6-phosphate/phosphate translocator 2, chloroplastic-like [Glycine max]
Glyma20g21911	1021	22	133	2.56089	15.124	2.56212	Up	3.21e-20	2.21e-18	-	-	-	-	gi|356535440|ref|XP_003536253.1|/2.15158e-12/PREDICTED: uncharacterized protein At4g14450, chloroplastic-like [Glycine max]
Glyma03g28430	290	5	30	2.04912	12.0106	2.55123	Up	1.75e-05	0.000234396	-	-	-	-	gi|357508657|ref|XP_003624617.1|/1.85744e-12/hypothetical protein MTR_7g085480 [Medicago truncatula]
Glyma01g29930	939	17	101	2.15168	12.4881	2.53702	Up	1.58e-15	7.98e-14	K06892|1|8e-42|169|pop:POPTR_550478|;K05933|2|5e-40|162|mtr:MTR_2g025120|aminocyclopropanecarboxylate oxidase [EC:1.14.17.4];K05277|5|3e-39|160|pop:POPTR_646527|leucoanthocyanidin dioxygenase [EC:1.14.11.19]	-	GO:0046914//transition metal ion binding;GO:0016706//oxidoreductase activity, acting on paired donors, with incorporation or reduction of molecular oxygen, 2-oxoglutarate as one donor, and incorporation of one atom each of oxygen into both donors;GO:0016701//oxidoreductase activity, acting on single donors with incorporation of molecular oxygen	GO:0008152//metabolic process	gi|356495029|ref|XP_003516383.1|/1.90126e-121/PREDICTED: 1-aminocyclopropane-1-carboxylate oxidase 1-like [Glycine max]
Glyma02g18090	1363	32	183	2.79028	15.5882	2.48197	Up	2.29e-26	2.29e-24	K10082|1|1e-39|162|mtr:MTR_5g031140|lectin, mannose-binding 2	-	GO:0048029//monosaccharide binding	-	gi|380848783|ref|NP_001237210.2|/2.23045e-146/lectin precursor [Glycine max]
Glyma20g23721	1218	9	51	0.878192	4.86141	2.46877	Up	2.98e-08	6.76e-07	-	-	-	-	gi|356575422|ref|XP_003555840.1|/7.21123e-53/PREDICTED: uncharacterized protein LOC100784754 [Glycine max]
Glyma17g34220	794	20	111	2.99367	16.2309	2.43875	Up	3.03e-16	1.6e-14	K13993|1|8e-81|298|gmx:100500666|HSP20 family protein	-	-	-	gi|123580|sp|P05477.1|HSP21_SOYBN/1.36767e-87/RecName: Full=17.9 kDa class II heat shock protein
Glyma18g42610	3606	9	49	0.296627	1.57765	2.41105	Up	8.51e-08	1.81e-06	K08286|1|2e-105|382|ath:AT4G28490|protein-serine/threonine kinase [EC:2.7.11.-];K00924|3|1e-102|373|ath:AT1G75820|[EC:2.7.1.-]	-	-	-	gi|356566654|ref|XP_003551545.1|/0/PREDICTED: probable LRR receptor-like serine/threonine-protein kinase At4g08850-like [Glycine max]
Glyma20g23711	1159	5	27	0.512721	2.70471	2.39923	Up	8.68e-05	0.000968182	-	-	-	-	gi|356575422|ref|XP_003555840.1|/1.96384e-36/PREDICTED: uncharacterized protein LOC100784754 [Glycine max]
Glyma06g14100	475	7	37	1.75145	9.04373	2.36837	Up	4.49e-06	6.86e-05	-	-	-	-	gi|356516150|ref|XP_003526759.1|/1.58871e-13/PREDICTED: uncharacterized protein LOC100802275 [Glycine max]
Glyma07g05370	1585	10	52	0.749834	3.80902	2.34478	Up	5.6e-08	1.22e-06	-	-	-	-	gi|356520206|ref|XP_003528755.1|/4.34291e-150/PREDICTED: NAC domain-containing protein 69-like [Glycine max]
Glyma10g11700	2089	20	102	1.13785	5.66893	2.31676	Up	3.08e-14	1.38e-12	K13366|1|0.0|951|gmx:100805182|polyamine oxidase (propane-1,3-diamine-forming) [EC:1.5.3.14]	-	GO:0016647//oxidoreductase activity, acting on the CH-NH group of donors, oxygen as acceptor;GO:0050662//coenzyme binding	GO:0008152//metabolic process	gi|356534600|ref|XP_003535841.1|/0/PREDICTED: polyamine oxidase 1-like [Glycine max]
Glyma19g39030	1382	23	116	1.97794	9.74518	2.30069	Up	6.97e-16	3.6e-14	K14493|1|7e-35|146|ppp:PHYPADRAFT_118478|gibberellin receptor GID1 [EC:3.-.-.-]	-	-	-	gi|356572688|ref|XP_003554498.1|/7.73496e-179/PREDICTED: probable carboxylesterase 15-like [Glycine max]
Glyma08g15350	1468	49	245	3.96702	19.3767	2.28819	Up	9.75e-32	1.23e-29	K09286|1|4e-25|114|ath:AT1G43160|EREBP-like factor	-	-	GO:0009737//response to abscisic acid stimulus;GO:0050794//regulation of cellular process;GO:0006950//response to stress	gi|255639269|gb|ACU19933.1|/3.13912e-101/unknown [Glycine max]
Glyma14g07330	436	6	30	1.63553	7.98867	2.28819	Up	5.54e-05	0.000650081	-	GO:0031410//cytoplasmic vesicle	-	-	gi|357492261|ref|XP_003616419.1|/3.15403e-20/hypothetical protein MTR_5g080040 [Medicago truncatula]
Glyma02g03420	1779	80	400	5.34452	26.105	2.28819	Up	8.16e-51	1.86e-48	K11820|1|3e-125|447|ath:AT1G24100|N-hydroxythioamide S-beta-glucosyltransferase [EC:2.4.1.195];K13691|3|2e-123|441|vvi:100242294|pathogen-inducible salicylic acid glucosyltransferase [EC:2.4.1.-]	-	GO:0035251//UDP-glucosyltransferase activity	-	gi|356501236|ref|XP_003519432.1|/0/PREDICTED: UDP-glycosyltransferase 74B1-like [Glycine max]
Glyma07g08300	1173	6	30	0.607922	2.96936	2.28819	Up	5.54e-05	0.000649904	-	-	-	-	gi|356506294|ref|XP_003521920.1|/1.28959e-43/PREDICTED: BON1-associated protein 2-like [Glycine max]
Glyma10g43165	896	8	39	1.06115	5.05355	2.25167	Up	4.81e-06	7.3e-05	-	-	-	-	gi|356575422|ref|XP_003555840.1|/5.99534e-37/PREDICTED: uncharacterized protein LOC100784754 [Glycine max]
Glyma06g12470	1541	8	39	0.616995	2.93834	2.25167	Up	4.81e-06	7.3e-05	K00660|1|2e-107|388|gmx:100775264|chalcone synthase [EC:2.3.1.74]	-	GO:0016747//transferase activity, transferring acyl groups other than amino-acyl groups	GO:0008152//metabolic process	gi|356515949|ref|XP_003526659.1|/0/PREDICTED: chalcone synthase 2-like [Glycine max]
Glyma02g43830	974	24	116	2.92851	13.8273	2.23929	Up	2.04e-15	1.02e-13	-	-	-	-	gi|351722685|ref|NP_001234949.1|/1.5311e-129/uncharacterized protein LOC100305920 [Glycine max]
Glyma18g09670	2472	8	37	0.384624	1.73777	2.17572	Up	1.32e-05	0.000181492	K13457|1|1e-117|422|rcu:RCOM_0742270|disease resistance protein RPM1	-	GO:0032559	GO:0012501//programmed cell death;GO:0006950//response to stress	gi|356566971|ref|XP_003551698.1|/0/PREDICTED: disease resistance protein RPM1-like [Glycine max]
Glyma04g40861	725	13	58	2.13108	9.28816	2.12381	Up	6.53e-08	1.41e-06	-	-	-	-	gi|255629841|gb|ACU15271.1|/9.07255e-16/unknown [Glycine max]
Glyma09g30970	351	11	48	3.7246	15.8772	2.0918	Up	1.18e-06	2.03e-05	-	GO:0009534//chloroplast thylakoid	-	GO:0044237//cellular metabolic process	gi|356531166|ref|XP_003534149.1|/1.31884e-42/PREDICTED: photosystem I assembly protein ycf3-like [Glycine max]
Glyma10g41761	3249	13	56	0.475541	2.00114	2.07318	Up	1.72e-07	3.48e-06	K04733|1|2e-56|219|smo:SELMODRAFT_159261|interleukin-1 receptor-associated kinase 4 [EC:2.7.11.1];K00924|5|1e-50|200|osa:4333525|[EC:2.7.1.-]	-	GO:0016301//kinase activity	-	gi|356534350|ref|XP_003535719.1|/0/PREDICTED: uncharacterized protein LOC100778085 [Glycine max]
Glyma11g02880	1605	20	86	1.48098	6.22104	2.0706	Up	8.3e-11	2.61e-09	K03327|1|0.0|913|gmx:100811560|multidrug resistance protein, MATE family	GO:0044464//cell part	GO:0015291//secondary active transmembrane transporter activity	GO:0015893//drug transport	gi|356540464|ref|XP_003538709.1|/0/PREDICTED: MATE efflux family protein 6-like [Glycine max]
Glyma01g04250	1766	265	1137	17.834	74.7497	2.06743	Up	1.48e-124	1.74e-121	K11820|1|7e-134|476|ath:AT1G24100|N-hydroxythioamide S-beta-glucosyltransferase [EC:2.4.1.195];K13691|2|3e-133|474|vvi:100242294|pathogen-inducible salicylic acid glucosyltransferase [EC:2.4.1.-]	-	GO:0035251//UDP-glucosyltransferase activity	-	gi|356498018|ref|XP_003517852.1|/0/PREDICTED: UDP-glycosyltransferase 74B1-like [Glycine max]
Glyma06g19810	915	25	106	3.24723	13.4501	2.05033	Up	7.28e-13	2.89e-11	-	-	-	-	gi|356516708|ref|XP_003527035.1|/2.88766e-26/PREDICTED: uncharacterized protein LOC100500306 [Glycine max]
Glyma2269s00200	760	10	42	1.5638	6.41616	2.03666	Up	8.19e-06	0.000118558	K02109|1|2e-49|193|vvi:100855199|F-type H+-transporting ATPase subunit b [EC:3.6.3.14];K02262|4|1e-48|191|rcu:RCOM_2040800|cytochrome c oxidase subunit 3	GO:0031224//intrinsic to membrane;GO:0005753//mitochondrial proton-transporting ATP synthase complex	GO:0015002//heme-copper terminal oxidase activity;GO:0015077//monovalent inorganic cation transmembrane transporter activity	GO:0006754//ATP biosynthetic process;GO:0022904//respiratory electron transport chain	gi|297740930|emb|CBI31112.3|/8.54203e-52/unnamed protein product [Vitis vinifera]
Glyma20g33090	1938	38	156	2.33037	9.34567	2.00374	Up	8.82e-18	5.23e-16	K00517|1|5e-92|337|osa:4348172|[EC:1.14.-.-];K13261|2|2e-78|291|gmx:100776878|cytochrome P450, family 93, subfamily A, polypeptide 1 (3,9-dihydroxypterocarpan 6a-monooxygenase) [EC:1.14.13.28];K16084|3|3e-78|291|osa:4329723|cytochrome P450, family 76, subfamily M, polypeptide 7 (ent-cassa-12,15-diene 11-hydroxylase) [EC:1.14.13.145];K05280|5|3e-71|268|osa:4348304|flavonoid 3'-monooxygenase [EC:1.…	-	GO:0046872//metal ion binding	-	gi|356576337|ref|XP_003556289.1|/0/PREDICTED: 7-ethoxycoumarin O-deethylase-like [Glycine max]
Glyma07g36430	1473	30	123	2.42054	9.69487	2.00189	Up	2.66e-14	1.2e-12	K09422|1|3e-94|343|pop:POPTR_564352|myb proto-oncogene protein, plant	GO:0043231//intracellular membrane-bounded organelle	-	GO:0009725//response to hormone stimulus;GO:0006970//response to osmotic stress;GO:0051707//response to other organism	gi|358248638|ref|NP_001239915.1|/2.62915e-156/uncharacterized protein LOC100791349 [Glycine max]
Glyma10g04550	1266	23	94	2.15918	8.62053	1.99729	Up	3.2e-11	1.05e-09	-	-	-	-	gi|351721136|ref|NP_001238479.1|/4.18467e-51/uncharacterized protein LOC100305902 [Glycine max]
Glyma03g40740	1019	12	49	1.39959	5.58292	1.99601	Up	1.9e-06	3.12e-05	K03116|1|2e-65|247|gmx:100797959|sec-independent protein translocase protein TatA	GO:0009526//plastid envelope;GO:0031224//intrinsic to membrane;GO:0009534//chloroplast thylakoid	GO:0022892	GO:0015031//protein transport	gi|356505957|ref|XP_003521755.1|/2.42208e-64/PREDICTED: uncharacterized protein LOC100797959 [Glycine max]
Glyma05g03560	1063	14	57	1.56527	6.2256	1.9918	Up	2.76e-07	5.43e-06	K09286|1|8e-30|129|ath:AT4G25480|EREBP-like factor	-	-	-	gi|356513683|ref|XP_003525540.1|/1.13241e-128/PREDICTED: dehydration-responsive element-binding protein 1F-like [Glycine max]
Glyma14g06400	1645	112	453	8.09183	31.9722	1.98228	Up	4.63e-48	9.82e-46	K06892|1|3e-68|257|pop:POPTR_550478|;K05277|2|3e-64|244|pop:POPTR_646527|leucoanthocyanidin dioxygenase [EC:1.14.11.19];K05278|3|4e-62|237|rcu:RCOM_1031440|flavonol synthase [EC:1.14.11.23]	-	GO:0003824//catalytic activity;GO:0046914//transition metal ion binding	GO:0008152//metabolic process;GO:0009628//response to abiotic stimulus	gi|356551436|ref|XP_003544081.1|/0/PREDICTED: codeine O-demethylase-like [Glycine max]
Glyma01g35420	330	10	40	3.60148	14.073	1.96627	Up	2.12e-05	0.000278095	-	-	-	-	gi|357484537|ref|XP_003612556.1|/3.58071e-19/hypothetical protein MTR_5g026380 [Medicago truncatula]
Glyma06g43970	1414	9	36	0.756463	2.95592	1.96627	Up	5.65e-05	0.000661206	K16040|1|8e-122|435|vvi:100233030|trans-resveratrol di-O-methyltransferase [EC:2.1.1.240];K13230|2|4e-59|227|zma:100147731|2,4,7-trihydroxy-1,4-benzoxazin-3-one-glucoside 7-O-methyltransferase [EC:2.1.1.241];K05279|3|6e-44|176|aly:ARALYDRAFT_495497|flavonol 3-O-methyltransferase [EC:2.1.1.76];K13066|5|1e-39|162|pop:POPTR_824484|caffeic acid 3-O-methyltransferase [EC:2.1.1.68]	-	GO:0005515//protein binding;GO:0008171//O-methyltransferase activity	GO:0006730//one-carbon metabolic process	gi|356517464|ref|XP_003527407.1|/0/PREDICTED: 8-hydroxyquercetin 8-O-methyltransferase-like isoform 1 [Glycine max]
Glyma01g34380	1096	35	138	3.79535	14.6187	1.94551	Up	2.41e-15	1.2e-13	-	-	-	-	gi|356505805|ref|XP_003521680.1|/4.2043e-126/PREDICTED: uncharacterized protein LOC100527010 [Glycine max]
Glyma14g05630	1295	159	621	14.5922	55.6752	1.93183	Up	4.03e-63	1.3e-60	-	-	GO:0046872//metal ion binding	-	gi|356554586|ref|XP_003545626.1|/1.98128e-72/PREDICTED: uncharacterized protein LOC100813858 [Glycine max]
Glyma17g04590	4181	46	178	1.30759	4.94287	1.91844	Up	4.79e-19	3.03e-17	K05658|1|0.0|1920|mtr:MTR_4g124040|ATP-binding cassette, subfamily B (MDR/TAP), member 1	-	-	-	gi|356564678|ref|XP_003550577.1|/0/PREDICTED: ABC transporter B family member 11-like [Glycine max]
Glyma08g06340	1145	58	223	6.02028	22.612	1.90919	Up	2.41e-23	2e-21	-	-	-	-	gi|356524742|ref|XP_003530987.1|/8.93516e-66/PREDICTED: F-box protein At1g61340-like [Glycine max]
Glyma07g07771	1648	11	42	0.793286	2.95891	1.89915	Up	2.04e-05	0.000268898	K01068|1|4e-150|530|aly:ARALYDRAFT_470104|palmitoyl-CoA hydrolase [EC:3.1.2.2];K01076|3|1e-125|448|ath:AT4G00520|[EC:3.1.2.-]	GO:0042579//microbody	GO:0000166//nucleotide binding	GO:0006732//coenzyme metabolic process	gi|356520412|ref|XP_003528856.1|/0/PREDICTED: acyl-coenzyme A thioesterase 8-like [Glycine max]
Glyma20g01100	2394	11	42	0.546088	2.03688	1.89915	Up	2.04e-05	0.000268816	-	-	-	-	gi|356575090|ref|XP_003555675.1|/8.66763e-33/PREDICTED: uncharacterized protein LOC100785635 [Glycine max]
Glyma01g17590	480	10	38	2.47601	9.19141	1.89227	Up	5.42e-05	0.000636579	-	-	-	-	-
Glyma15g14620	1665	39	144	2.78384	10.0413	1.85079	Up	5.17e-15	2.5e-13	K09422|1|2e-74|278|vvi:100248153|myb proto-oncogene protein, plant	GO:0043231//intracellular membrane-bounded organelle;GO:0043231//intracellular membrane-bounded organelle	GO:0003676//nucleic acid binding;GO:0003676//nucleic acid binding	-	gi|356555971|ref|XP_003546301.1|/1.26376e-130/PREDICTED: transcription repressor MYB6 [Glycine max]
Glyma19g34740	1230	132	478	12.7545	45.1193	1.82274	Up	2.12e-45	4.31e-43	K09422|1|5e-153|538|gmx:100802214|myb proto-oncogene protein, plant	-	-	-	gi|356570646|ref|XP_003553496.1|/6.87471e-152/PREDICTED: myb-related protein Myb4-like [Glycine max]
Glyma04g03900	1060	13	47	1.45758	5.14792	1.82042	Up	1.16e-05	0.000161643	-	-	-	-	gi|356510348|ref|XP_003523901.1|/2.91402e-76/PREDICTED: uncharacterized protein LOC100781181 [Glycine max]
Glyma19g41580	549	41	148	8.87577	31.2989	1.81817	Up	4.67e-15	2.26e-13	-	-	-	-	gi|356572924|ref|XP_003554615.1|/3.11009e-90/PREDICTED: transcription factor bHLH149-like [Glycine max]
Glyma11g03470	576	25	90	5.15836	18.1409	1.81426	Up	1.15e-09	3.12e-08	-	-	-	-	gi|255631091|gb|ACU15911.1|/8.308e-28/unknown [Glycine max]
Glyma08g03060	2848	16	57	0.667689	2.32367	1.79916	Up	1.59e-06	2.65e-05	K15813|1|0.0|883|vvi:100259856|beta-amyrin synthase [EC:5.4.99.39];K01853|2|0.0|872|sbi:SORBI_04g003200|cycloartenol synthase [EC:5.4.99.8]	-	GO:0016853//isomerase activity;GO:0016853//isomerase activity;GO:0016853//isomerase activity;GO:0016853//isomerase activity	-	gi|356523704|ref|XP_003530475.1|/0/PREDICTED: cycloartenol synthase-like isoform 1 [Glycine max]
Glyma07g01730	1076	621	2204	68.592	237.815	1.79373	Up	1.74e-198	6.29e-195	K02866|1|9e-08|56.2|osa:4332737|large subunit ribosomal protein L10e	-	GO:0016791//phosphatase activity;GO:0016791//phosphatase activity	-	gi|41400345|gb|AAS07026.1|/3.38362e-115/vegetative storage protein [Glycine falcata]
Glyma12g31900	1206	44	156	4.3361	15.0182	1.79224	Up	1.63e-15	8.22e-14	K14009|1|8e-71|265|gmx:100798727|B-cell receptor-associated protein 31	GO:0031090//organelle membrane;GO:0043231//intracellular membrane-bounded organelle	-	-	gi|356543692|ref|XP_003540294.1|/1.5615e-100/PREDICTED: uncharacterized protein LOC100790767 [Glycine max]
Glyma15g04900	439	39	138	10.5583	36.4968	1.78939	Up	7.35e-14	3.18e-12	-	-	-	-	-
Glyma10g05210	1185	61	215	6.11795	21.0649	1.78372	Up	1.05e-20	7.45e-19	-	-	-	-	gi|356537375|ref|XP_003537203.1|/6.42258e-83/PREDICTED: zinc finger protein ZAT11-like [Glycine max]
Glyma02g43370	917	104	365	13.479	46.2129	1.77758	Up	6.43e-34	8.86e-32	-	-	GO:0046872//metal ion binding	-	gi|351721377|ref|NP_001237975.1|/1.92078e-70/uncharacterized protein LOC100500687 [Glycine max]
Glyma06g45043	2610	88	308	4.00716	13.7009	1.77362	Up	8.74e-29	9.75e-27	K13066|1|5e-34|144|pop:POPTR_824484|caffeic acid 3-O-methyltransferase [EC:2.1.1.68];K05279|2|7e-34|144|aly:ARALYDRAFT_495497|flavonol 3-O-methyltransferase [EC:2.1.1.76]	-	GO:0008171//O-methyltransferase activity;GO:0008171//O-methyltransferase activity	-	gi|371502138|ref|NP_001243073.1|/5.11276e-145/3'-hydroxy-N-methyl-(S)-coclaurine 4'-O-methyltransferase-like [Glycine max]
Glyma08g14900	2366	16	56	0.80371	2.74798	1.77362	Up	2.47e-06	3.96e-05	K09755|1|0.0|652|rcu:RCOM_0193830|ferulate-5-hydroxylase [EC:1.14.-.-]	-	GO:0004497//monooxygenase activity;GO:0005506//iron ion binding	GO:0008152//metabolic process	gi|356525525|ref|XP_003531375.1|/0/PREDICTED: cytochrome P450 750A1-like [Glycine max]
Glyma02g15970	1257	15	52	1.41824	4.80295	1.75982	Up	6.44e-06	9.5e-05	-	-	-	-	gi|356500135|ref|XP_003518889.1|/4.30619e-32/PREDICTED: PRA1 family protein F4-like [Glycine max]
Glyma02g42470	1666	31	107	2.21147	7.45673	1.75354	Up	8.65e-11	2.71e-09	K06892|1|4e-65|247|pop:POPTR_550478|;K05277|2|2e-61|235|pop:POPTR_646527|leucoanthocyanidin dioxygenase [EC:1.14.11.19];K05278|3|7e-61|233|rcu:RCOM_1031440|flavonol synthase [EC:1.14.11.23]	-	GO:0003824//catalytic activity;GO:0046914//transition metal ion binding	GO:0008152//metabolic process;GO:0009628//response to abiotic stimulus	gi|356501166|ref|XP_003519399.1|/0/PREDICTED: leucoanthocyanidin dioxygenase-like [Glycine max]
Glyma06g22018	1490	12	41	0.957171	3.19475	1.73886	Up	7.43e-05	0.000841162	K13172|1|1e-05|50.1|ppp:PHYPADRAFT_92690|serine/arginine repetitive matrix protein 2	-	-	-	gi|356507076|ref|XP_003522297.1|/2.78403e-121/PREDICTED: uncharacterized protein LOC100796899 [Glycine max]
Glyma03g31980	1221	82	278	7.98165	26.4344	1.72766	Up	2.99e-25	2.82e-23	K09422|1|6e-159|558|gmx:100775603|myb proto-oncogene protein, plant	-	-	-	gi|356505017|ref|XP_003521289.1|/8.32483e-158/PREDICTED: myb-related protein Myb4-like [Glycine max]
Glyma13g33920	1345	21	71	1.85563	6.1288	1.7237	Up	1.89e-07	3.81e-06	-	-	-	-	gi|356549602|ref|XP_003543181.1|/1.71875e-175/PREDICTED: uncharacterized protein LOC100306249 isoform 1 [Glycine max]
Glyma12g16750	2234	103	348	5.47959	18.0857	1.72271	Up	4.27e-31	5.25e-29	K14494|1|9e-61|233|pop:POPTR_645273|DELLA protein	-	-	-	gi|356545173|ref|XP_003541019.1|/0/PREDICTED: chitin-inducible gibberellin-responsive protein 1-like [Glycine max]
Glyma03g26310	1058	28	94	3.14533	10.3153	1.7135	Up	2.23e-09	5.86e-08	K09286|1|5e-29|126|ath:AT4G17500|EREBP-like factor;K14517|2|9e-26|115|ath:AT5G47220|ethylene-responsive transcription factor 2	GO:0043231//intracellular membrane-bounded organelle	GO:0003676//nucleic acid binding;GO:0001071//nucleic acid binding transcription factor activity	GO:0000160//two-component signal transduction system (phosphorelay);GO:0009743//response to carbohydrate stimulus;GO:0006351//transcription, DNA-dependent	gi|356504573|ref|XP_003521070.1|/1.1697e-101/PREDICTED: ethylene-responsive transcription factor 13-like [Glycine max]
Glyma04g39510	1285	125	418	11.5612	37.767	1.70784	Up	1.34e-36	2.09e-34	K09286|1|3e-20|97.8|ath:AT1G43160|EREBP-like factor	-	-	GO:0009987//cellular process;GO:0010033//response to organic substance	gi|356509018|ref|XP_003523249.1|/2.35149e-126/PREDICTED: ethylene-responsive transcription factor ERF109-like [Glycine max]
Glyma15g08580	1195	27	90	2.68528	8.74408	1.70323	Up	5.69e-09	1.43e-07	K09286|1|3e-24|111|mtr:MTR_4g100420|EREBP-like factor;K14516|2|4e-24|110|rcu:RCOM_1007740|ethylene-responsive transcription factor 1	GO:0043231//intracellular membrane-bounded organelle	-	GO:0009743//response to carbohydrate stimulus;GO:0050794//regulation of cellular process;GO:0006351//transcription, DNA-dependent	gi|356557719|ref|XP_003547160.1|/5.98924e-145/PREDICTED: ethylene-responsive transcription factor ERF091-like [Glycine max]
Glyma20g27790	2947	16	53	0.645259	2.08802	1.69419	Up	9.17e-06	0.000130739	K04733|1|1e-55|216|smo:SELMODRAFT_230241|interleukin-1 receptor-associated kinase 4 [EC:2.7.11.1];K00924|3|6e-53|207|osa:4333912|[EC:2.7.1.-];K13430|5|5e-51|201|vvi:100254113|serine/threonine-protein kinase PBS1 [EC:2.7.11.1]	-	GO:0016740//transferase activity	-	gi|356574384|ref|XP_003555328.1|/0/PREDICTED: cysteine-rich receptor-like protein kinase 10-like [Glycine max]
Glyma04g34890	771	164	539	25.2804	81.166	1.68286	Up	8.7e-46	1.79e-43	-	-	-	-	gi|255631556|gb|ACU16145.1|/4.54203e-32/unknown [Glycine max]
Glyma10g42450	1443	63	207	5.18882	16.655	1.68247	Up	1.53e-18	9.45e-17	-	GO:0043231//intracellular membrane-bounded organelle	GO:0003676//nucleic acid binding;GO:0001071//nucleic acid binding transcription factor activity	GO:0006351//transcription, DNA-dependent	gi|351725775|ref|NP_001237360.1|/1.28062e-123/syringolide-induced protein 1-3-1A [Glycine max]
Glyma13g30510	807	14	46	2.06181	6.61796	1.68247	Up	4.02e-05	0.000487668	-	-	-	-	-
Glyma09g33480	1938	51	167	3.1276	10.0047	1.67755	Up	3.5e-15	1.71e-13	K00600|1|0.0|886|gmx:100499635|glycine hydroxymethyltransferase [EC:2.1.2.1]	GO:0043231//intracellular membrane-bounded organelle	GO:0016742//hydroxymethyl-, formyl- and related transferase activity;GO:0048037//cofactor binding	GO:0009069//serine family amino acid metabolic process;GO:0006730//one-carbon metabolic process	gi|356531377|ref|XP_003534254.1|/0/PREDICTED: serine hydroxymethyltransferase, mitochondrial-like [Glycine max]
Glyma06g39810	1284	15	49	1.38842	4.43068	1.67409	Up	2.38e-05	0.000306456	-	-	GO:0046914//transition metal ion binding;GO:0001071//nucleic acid binding transcription factor activity	GO:0006351//transcription, DNA-dependent	gi|356517217|ref|XP_003527285.1|/1.26141e-87/PREDICTED: uncharacterized protein LOC100818267 [Glycine max]
Glyma13g02220	1000	24	78	2.85237	9.05596	1.66671	Up	9.5e-08	2e-06	-	-	-	-	gi|356548425|ref|XP_003542602.1|/6.89742e-40/PREDICTED: uncharacterized protein LOC100791854 [Glycine max]
Glyma06g15341	1662	84	273	6.00679	19.0709	1.66671	Up	1.13e-23	9.5e-22	K09286|1|4e-15|81.3|vvi:100248027|EREBP-like factor	-	-	-	gi|356518730|ref|XP_003528031.1|/1.30038e-114/PREDICTED: ethylene-responsive transcription factor ERF109-like [Glycine max]
Glyma15g12815	2698	20	65	0.881013	2.79712	1.66671	Up	1.15e-06	1.98e-05	-	-	GO:0060089;GO:0060089	GO:0009314//response to radiation;GO:0023052//signaling;GO:0009314//response to radiation;GO:0023052//signaling	gi|356558003|ref|XP_003547299.1|/0/PREDICTED: BTB/POZ domain-containing protein At5g47800-like [Glycine max]
Glyma10g33060	1592	32	104	2.38892	7.58455	1.66671	Up	6.76e-10	1.9e-08	K14516|1|1e-44|179|rcu:RCOM_1007740|ethylene-responsive transcription factor 1	-	GO:0003676//nucleic acid binding	GO:0000160//two-component signal transduction system (phosphorelay);GO:0006351//transcription, DNA-dependent;GO:0006950//response to stress	gi|356535422|ref|XP_003536244.1|/3.37994e-80/PREDICTED: ethylene-responsive transcription factor 1B-like [Glycine max]
Glyma13g28040	1577	124	402	9.34511	29.5961	1.66312	Up	5.08e-34	7.05e-32	-	-	-	-	gi|356549011|ref|XP_003542892.1|/3.87815e-161/PREDICTED: uncharacterized protein LOC100811854 [Glycine max]
Glyma01g42560	2119	129	418	7.23524	22.9026	1.6624	Up	2.74e-35	4e-33	K03327|1|0.0|1046|gmx:100811560|multidrug resistance protein, MATE family	GO:0044464//cell part	GO:0015291//secondary active transmembrane transporter activity	GO:0015893//drug transport	gi|356495653|ref|XP_003516689.1|/0/PREDICTED: MATE efflux family protein 6-like [Glycine max]
Glyma01g29760	1468	18	58	1.45727	4.58714	1.65432	Up	4.95e-06	7.48e-05	-	GO:0031981//nuclear lumen;GO:0031981//nuclear lumen	GO:0003677//DNA binding;GO:0005515//protein binding;GO:0003677//DNA binding;GO:0005515//protein binding	GO:0006351//transcription, DNA-dependent;GO:0006351//transcription, DNA-dependent	gi|356496207|ref|XP_003516961.1|/1.18459e-124/PREDICTED: trihelix transcription factor GT-3b-like [Glycine max]
Glyma04g01490	797	51	164	7.60512	23.8905	1.65139	Up	1.23e-14	5.72e-13	-	-	-	-	gi|356508426|ref|XP_003522958.1|/4.6277e-51/PREDICTED: uncharacterized protein LOC100816105 [Glycine max]
Glyma13g31931	1241	14	45	1.34076	4.20998	1.65077	Up	6.17e-05	0.000715818	-	-	-	-	gi|356546670|ref|XP_003541746.1|/7.50119e-130/PREDICTED: uncharacterized protein LOC100794998 [Glycine max]
Glyma14g09120	1675	20	64	1.41909	4.43614	1.64434	Up	1.75e-06	2.9e-05	-	-	-	-	gi|356552206|ref|XP_003544460.1|/1.92273e-98/PREDICTED: uncharacterized protein LOC100781222 [Glycine max]
Glyma01g44660	884	43	135	5.7811	17.7305	1.61682	Up	5.65e-12	2.05e-10	-	-	-	-	gi|357480919|ref|XP_003610745.1|/7.89833e-42/hypothetical protein MTR_5g006540 [Medicago truncatula]
Glyma04g21680	1850	15	47	0.963638	2.94962	1.61397	Up	5.56e-05	0.000651926	K14491|1|1e-11|70.1|mtr:MTR_4g131580|two-component response regulator ARR-B family	-	-	-	gi|356510564|ref|XP_003524007.1|/0/PREDICTED: uncharacterized protein LOC100815048 [Glycine max]
Glyma18g01340	769	117	366	18.0823	55.2579	1.6116	Up	8.11e-30	9.51e-28	-	-	-	-	gi|356567336|ref|XP_003551877.1|/3.52914e-45/PREDICTED: uncharacterized protein LOC100500344 [Glycine max]
Glyma15g42490	693	32	100	5.48796	16.7535	1.61012	Up	3.57e-09	9.18e-08	-	-	-	-	gi|357457525|ref|XP_003599043.1|/7.21938e-12/hypothetical protein MTR_3g027030 [Medicago truncatula]
Glyma07g16830	896	16	50	2.1223	6.47891	1.61012	Up	3.28e-05	0.000408031	K00799|1|8e-121|431|gmx:100808141|glutathione S-transferase [EC:2.5.1.18]	-	GO:0016765//transferase activity, transferring alkyl or aryl (other than methyl) groups	GO:0050896//response to stimulus	gi|356520951|ref|XP_003529123.1|/6.24412e-127/PREDICTED: probable glutathione S-transferase-like [Glycine max]
Glyma13g17930	4430	584	1817	15.6676	47.6202	1.60378	Up	3.03e-140	5.05e-137	K05658|1|0.0|1966|mtr:MTR_4g124040|ATP-binding cassette, subfamily B (MDR/TAP), member 1	-	-	-	gi|356545820|ref|XP_003541332.1|/0/PREDICTED: ABC transporter B family member 11-like [Glycine max]
Glyma15g18150	1044	48	149	5.46431	16.5701	1.60047	Up	6.66e-13	2.66e-11	-	-	-	-	gi|356556248|ref|XP_003546438.1|/9.27452e-35/PREDICTED: uncharacterized protein LOC100817592 [Glycine max]
Glyma04g38270	1763	111	344	7.48282	22.654	1.59812	Up	8.43e-28	8.94e-26	K14498|1|5e-179|625|gmx:547968|serine/threonine-protein kinase SRK2 [EC:2.7.11.1]	-	GO:0004672//protein kinase activity;GO:0032559	GO:0006464//cellular protein modification process	gi|351734430|ref|NP_001238298.1|/0/protein kinase [Glycine max]
Glyma02g44890	789	21	65	3.16327	9.5648	1.59632	Up	2.4e-06	3.86e-05	-	-	-	-	gi|356499315|ref|XP_003518487.1|/1.69811e-122/PREDICTED: uncharacterized protein LOC100776840 [Glycine max]
Glyma03g01800	1223	44	136	4.27583	12.9108	1.5943	Up	7.69e-12	2.73e-10	-	-	-	-	gi|388516383|gb|AFK46253.1|/6.84552e-27/unknown [Lotus japonicus]
Glyma13g01420	2620	34	105	1.54231	4.65294	1.59305	Up	1.93e-09	5.12e-08	K16055|1|0.0|1461|gmx:100789206|trehalose 6-phosphate synthase/phosphatase [EC:2.4.1.15 3.1.3.12]	-	GO:0019203//carbohydrate phosphatase activity;GO:0035251//UDP-glucosyltransferase activity	GO:0005991//trehalose metabolic process	gi|356547791|ref|XP_003542292.1|/0/PREDICTED: probable alpha,alpha-trehalose-phosphate synthase [UDP-forming] 11-like [Glycine max]
Glyma06g41500	2834	230	708	9.64545	29.005	1.58838	Up	5.26e-55	1.32e-52	K14494|1|1e-59|229|pop:POPTR_645273|DELLA protein	-	-	-	gi|356514974|ref|XP_003526176.1|/0/PREDICTED: chitin-inducible gibberellin-responsive protein 1-like [Glycine max]
Glyma17g12710	1134	17	52	1.78168	5.3239	1.57924	Up	2.94e-05	0.000369633	-	-	-	-	gi|358248696|ref|NP_001239669.1|/3.03484e-66/uncharacterized protein LOC100780553 [Glycine max]
Glyma05g01780	1114	20	61	2.13373	6.35747	1.57508	Up	6.1e-06	9.03e-05	-	-	-	GO:0006950//response to stress	gi|356512938|ref|XP_003525171.1|/5.04732e-42/PREDICTED: uncharacterized protein LOC100813287 [Glycine max]
Glyma19g16680	2213	61	186	3.27599	9.75823	1.57469	Up	2.02e-15	1.01e-13	-	-	GO:0003824//catalytic activity	-	gi|356571350|ref|XP_003553841.1|/0/PREDICTED: putative aminoacrylate hydrolase RutD-like [Glycine max]
Glyma15g09980	822	23	70	3.32545	9.88703	1.57199	Up	1.28e-06	2.17e-05	K13464|1|1e-07|55.5|pop:POPTR_548076|jasmonate ZIM domain-containing protein	-	-	-	gi|356555522|ref|XP_003546080.1|/4.206e-71/PREDICTED: protein TIFY 5A-like [Glycine max]
Glyma07g01040	1983	32	97	1.91788	5.67922	1.56618	Up	1.22e-08	2.91e-07	-	-	-	-	gi|356522180|ref|XP_003529725.1|/0/PREDICTED: uncharacterized protein LOC100784093 [Glycine max]
Glyma02g04000	1372	37	112	3.2051	9.47771	1.56417	Up	9.32e-10	2.56e-08	-	-	-	-	gi|356502255|ref|XP_003519935.1|/1.38055e-95/PREDICTED: uncharacterized protein LOC100776669 [Glycine max]
Glyma20g29111	1511	30	90	2.35967	6.91541	1.55123	Up	5.11e-08	1.13e-06	K13430|1|3e-25|114|aly:ARALYDRAFT_909268|serine/threonine-protein kinase PBS1 [EC:2.7.11.1];K00924|3|3e-25|114|osa:4333912|[EC:2.7.1.-];K04733|5|3e-25|114|pop:POPTR_878434|interleukin-1 receptor-associated kinase 4 [EC:2.7.11.1]	-	-	-	gi|356534179|ref|XP_003535635.1|/5.46049e-165/PREDICTED: receptor-like serine/threonine-protein kinase At4g25390-like [Glycine max]
Glyma15g07080	3427	54	161	1.87273	5.45446	1.5423	Up	3.51e-13	1.44e-11	K00924|1|2e-23|110|aly:ARALYDRAFT_313416|[EC:2.7.1.-];K04733|3|3e-20|99.4|smo:SELMODRAFT_159261|interleukin-1 receptor-associated kinase 4 [EC:2.7.11.1];K13416|5|9e-20|97.8|rcu:RCOM_1534760|brassinosteroid insensitive 1-associated receptor kinase 1 [EC:2.7.10.1 2.7.11.1]	GO:0043231//intracellular membrane-bounded organelle;GO:0016020//membrane;GO:0043231//intracellular membrane-bounded organelle;GO:0016020//membrane	GO:0019899//enzyme binding;GO:0004674//protein serine/threonine kinase activity;GO:0000166//nucleotide binding;GO:0019899//enzyme binding;GO:0004674//protein serine/threonine kinase activity;GO:0000166//nucleotide binding	GO:0009987//cellular process;GO:0009987//cellular process	gi|356546692|ref|XP_003541757.1|/0/PREDICTED: receptor-like serine/threonine-protein kinase SD1-8-like [Glycine max]
Glyma11g13270	1185	99	294	9.92913	28.8051	1.53658	Up	9.66e-23	7.74e-21	K01183|1|4e-101|366|gmx:100776582|chitinase [EC:3.2.1.14]	-	GO:0004553//hydrolase activity, hydrolyzing O-glycosyl compounds;GO:0030247//polysaccharide binding	GO:0006026	gi|351723339|ref|NP_001238555.1|/4.55612e-129/uncharacterized protein LOC100527091 [Glycine max]
Glyma14g14380	2594	20	59	0.916335	2.64072	1.52698	Up	1.38e-05	0.000188777	-	GO:0043231//intracellular membrane-bounded organelle	-	-	gi|356554266|ref|XP_003545469.1|/0/PREDICTED: uncharacterized protein LOC100787458 [Glycine max]
Glyma12g13920	1060	130	383	14.5758	41.9501	1.5251	Up	7.5e-29	8.44e-27	K03676|1|1e-13|75.9|bdi:100821530|glutaredoxin 3	-	GO:0005488//binding;GO:0015036//disulfide oxidoreductase activity	GO:0007165//signal transduction;GO:0010033//response to organic substance;GO:0019725//cellular homeostasis	gi|351727693|ref|NP_001235378.1|/9.96898e-93/uncharacterized protein LOC100306716 [Glycine max]
Glyma15g26790	1514	476	1399	37.3659	107.283	1.52163	Up	1.51e-100	1.13e-97	K13415|1|6e-29|127|osa:4324691|protein brassinosteroid insensitive 1 [EC:2.7.10.1 2.7.11.1]	GO:0005618//cell wall	GO:0004857//enzyme inhibitor activity	GO:0023052//signaling	gi|358248196|ref|NP_001239837.1|/2.53151e-178/polygalacturonase inhibitor 1-like precursor [Glycine max]
Glyma08g48000	1709	131	383	9.11011	26.0193	1.51404	Up	1.46e-28	1.61e-26	K03453|1|2e-12|72.4|vcn:VOLCADRAFT_102664|bile acid:Na+ symporter, BASS family	-	-	-	gi|356567284|ref|XP_003551851.1|/0/PREDICTED: uncharacterized protein LOC100818353 [Glycine max]
Glyma20g04415	830	52	152	7.44594	21.2621	1.51375	Up	3.19e-12	1.19e-10	K01099|1|2e-12|71.2|ota:Ot04g02290|phosphatidylinositol-bisphosphatase [EC:3.1.3.36]	-	GO:0046030//inositol trisphosphate phosphatase activity;GO:0016491//oxidoreductase activity	GO:0046838//phosphorylated carbohydrate dephosphorylation;GO:0009725//response to hormone stimulus;GO:0043647//inositol phosphate metabolic process;GO:0032501//multicellular organismal process	gi|356540589|ref|XP_003538770.1|/2.89103e-51/PREDICTED: type I inositol-1,4,5-trisphosphate 5-phosphatase 2-like [Glycine max]
Glyma19g35770	896	36	105	4.77517	13.6057	1.51059	Up	7.69e-09	1.89e-07	-	-	-	-	gi|351722434|ref|NP_001236732.1|/4.52703e-85/uncharacterized protein LOC100500607 [Glycine max]
Glyma04g14800	2529	376	1092	17.6699	50.1318	1.50444	Up	1.33e-77	6.68e-75	K00540|1|1e-142|505|ath:AT3G22370|[EC:1.-.-.-]	GO:0019866//organelle inner membrane;GO:0043231//intracellular membrane-bounded organelle;GO:0031224//intrinsic to membrane	GO:0043169//cation binding;GO:0016682//oxidoreductase activity, acting on diphenols and related substances as donors, oxygen as acceptor	GO:0051234//establishment of localization;GO:0032501//multicellular organismal process;GO:0006950//response to stress;GO:0007165//signal transduction;GO:0015980//energy derivation by oxidation of organic compounds	gi|351720843|ref|NP_001236166.1|/0/ubiquinol oxidase 1, mitochondrial [Glycine max]
Glyma17g06610	1279	324	937	30.1071	85.0567	1.49832	Up	1.88e-66	7.33e-64	K13422|1|3e-11|67.8|ppp:PHYPADRAFT_164647|transcription factor MYC2	-	GO:0016491//oxidoreductase activity;GO:0001071//nucleic acid binding transcription factor activity;GO:0016491//oxidoreductase activity	GO:0006351//transcription, DNA-dependent	gi|255634465|gb|ACU17597.1|/1.25737e-73/unknown [Glycine max]
Glyma01g42130	1448	55	159	4.51428	12.7488	1.49779	Up	1.51e-12	5.82e-11	-	-	-	-	gi|356497169|ref|XP_003517435.1|/3.26584e-127/PREDICTED: uncharacterized protein LOC100778228 [Glycine max]
Glyma13g44730	1716	47	135	3.25518	9.1339	1.48849	Up	8.92e-11	2.79e-09	K13424|1|8e-17|87.0|rcu:RCOM_0664190|WRKY transcription factor 33	-	-	-	gi|356550659|ref|XP_003543702.1|/8.74636e-138/PREDICTED: probable WRKY transcription factor 40-like isoform 1 [Glycine max]
Glyma08g21410	1285	1767	5071	163.429	458.174	1.48724	Up	0	0	K02866|1|2e-10|65.1|osa:4332737|large subunit ribosomal protein L10e	-	GO:0016791//phosphatase activity;GO:0016791//phosphatase activity	-	gi|359806656|ref|NP_001241536.1|/2.38313e-140/stem 31 kDa glycoprotein precursor [Glycine max]
Glyma10g01420	2010	29	83	1.71473	4.79426	1.48333	Up	4.2e-07	7.95e-06	K13508|1|0.0|1051|gmx:100781133|glycerol-3-phosphate acyltransferase [EC:2.3.1.15]	-	GO:0016747//transferase activity, transferring acyl groups other than amino-acyl groups	-	gi|356536680|ref|XP_003536864.1|/0/PREDICTED: probable glycerol-3-phosphate acyltransferase 3-like [Glycine max]
Glyma19g38590	933	41	117	5.22272	14.5594	1.47908	Up	1.92e-09	5.1e-08	K08488|1|8e-18|89.4|ath:AT1G32270|syntaxin 7	-	-	-	gi|356572610|ref|XP_003554461.1|/4.04943e-124/PREDICTED: putative syntaxin-24-like [Glycine max]
Glyma09g07680	1010	26	74	3.05947	8.50648	1.47528	Up	1.99e-06	3.26e-05	-	-	-	-	gi|356530415|ref|XP_003533777.1|/6.07298e-68/PREDICTED: uncharacterized protein LOC100791750 [Glycine max]
Glyma03g37360	1170	71	202	7.21219	20.045	1.47473	Up	3.11e-15	1.53e-13	K05283|1|2e-12|71.6|aly:ARALYDRAFT_354960|phosphatidylinositol glycan, class W [EC:2.3.-.-];K11982|2|3e-10|64.7|gmx:100813674|E3 ubiquitin-protein ligase RNF115/126 [EC:6.3.2.19]	GO:0031981//nuclear lumen;GO:0009536//plastid;GO:0015934//large ribosomal subunit;GO:0016020//membrane	GO:0019843//rRNA binding	GO:0009987//cellular process;GO:0003002//regionalization;GO:0009887//organ morphogenesis	gi|356572748|ref|XP_003554528.1|/8.24334e-91/PREDICTED: RING-H2 finger protein ATL5-like [Glycine max]
Glyma06g01550	795	47	133	7.02627	19.4234	1.46696	Up	1.94e-10	5.79e-09	-	-	-	-	gi|358248022|ref|NP_001240049.1|/1.58674e-35/uncharacterized protein LOC100787789 precursor [Glycine max]
Glyma13g38590	1319	60	169	5.40631	14.8758	1.46026	Up	8.22e-13	3.24e-11	K14009|1|5e-75|280|gmx:100798727|B-cell receptor-associated protein 31	GO:0031090//organelle membrane;GO:0043231//intracellular membrane-bounded organelle	-	-	gi|356550028|ref|XP_003543392.1|/9.66278e-107/PREDICTED: uncharacterized protein LOC100812220 [Glycine max]
Glyma07g15070	1117	31	87	3.2984	9.04286	1.45501	Up	3.26e-07	6.32e-06	-	-	-	-	gi|358248390|ref|NP_001240129.1|/1.01174e-74/uncharacterized protein LOC100775516 [Glycine max]
Glyma18g42580	2129	24	67	1.33977	3.65375	1.44739	Up	8.3e-06	0.000119998	K13508|1|0.0|1022|gmx:100808918|glycerol-3-phosphate acyltransferase [EC:2.3.1.15]	GO:0044464//cell part	GO:0016411//acylglycerol O-acyltransferase activity	GO:0006633//fatty acid biosynthetic process;GO:0009791//post-embryonic development	gi|356568058|ref|XP_003552230.1|/0/PREDICTED: glycerol-3-phosphate acyltransferase 6-like [Glycine max]
Glyma13g37320	843	43	120	6.06227	16.527	1.44689	Up	2.19e-09	5.78e-08	-	-	-	-	-
Glyma13g37990	1068	19	53	2.11435	5.76162	1.44626	Up	7.67e-05	0.000866535	K13448|1|2e-06|51.6|osa:4339701|calcium-binding protein CML	-	-	-	gi|356547045|ref|XP_003541928.1|/2.96021e-52/PREDICTED: calcium-binding protein PBP1-like [Glycine max]
Glyma13g05280	1077	28	78	3.08985	8.4085	1.44431	Up	1.54e-06	2.58e-05	-	GO:0043231//intracellular membrane-bounded organelle	-	-	gi|356550791|ref|XP_003543767.1|/4.08966e-33/PREDICTED: transcription factor bHLH135-like [Glycine max]
Glyma03g37310	681	46	128	8.02796	21.8224	1.4427	Up	6.95e-10	1.95e-08	-	-	-	-	gi|351726544|ref|NP_001237642.1|/3.26711e-49/uncharacterized protein LOC100500411 [Glycine max]
Glyma16g23750	1060	27	75	3.02728	8.21476	1.4402	Up	2.58e-06	4.12e-05	K03686|1|1e-09|62.4|osa:4331058|molecular chaperone DnaJ;K09510|2|2e-09|61.6|vcn:VOLCADRAFT_57911|DnaJ homolog subfamily B member 4;K09527|3|3e-09|60.8|cre:CHLREDRAFT_146571|DnaJ homolog subfamily C member 7	GO:0043231//intracellular membrane-bounded organelle	-	GO:0050896//response to stimulus	gi|356559290|ref|XP_003547933.1|/3.66918e-87/PREDICTED: chaperone protein dnaJ 11, chloroplastic-like [Glycine max]
Glyma14g05090	1173	47	130	4.76205	12.8672	1.43405	Up	6.11e-10	1.72e-08	-	-	-	-	gi|356554452|ref|XP_003545560.1|/9.67004e-116/PREDICTED: uncharacterized protein LOC100782670 [Glycine max]
Glyma08g47070	1333	20	55	1.78318	4.79041	1.4257	Up	6.7e-05	0.000766918	-	-	-	-	gi|356524529|ref|XP_003530881.1|/9.0625e-153/PREDICTED: uncharacterized protein LOC100788542 [Glycine max]
Glyma03g33070	1120	32	88	3.39568	9.1223	1.4257	Up	4.2e-07	7.95e-06	-	-	-	-	gi|351721114|ref|NP_001235663.1|/1.78488e-87/uncharacterized protein LOC100526897 [Glycine max]
Glyma01g45260	691	43	118	7.39579	19.8264	1.42265	Up	4.7e-09	1.19e-07	-	-	-	-	-
Glyma20g35160	1169	23	63	2.33834	6.25699	1.41998	Up	2.06e-05	0.000270164	-	-	-	-	gi|351720911|ref|NP_001236936.1|/2.23634e-88/uncharacterized protein LOC100305805 [Glycine max]
Glyma17g04171	1648	63	172	4.54337	12.1174	1.41525	Up	1.75e-12	6.68e-11	K09422|1|4e-92|337|pop:POPTR_564352|myb proto-oncogene protein, plant	GO:0043231//intracellular membrane-bounded organelle	-	GO:0009725//response to hormone stimulus;GO:0006970//response to osmotic stress;GO:0051707//response to other organism	gi|356565345|ref|XP_003550902.1|/1.54911e-160/PREDICTED: transcription factor MYB39 [Glycine max]
Glyma18g49350	3063	92	251	3.56973	9.51407	1.41425	Up	1.55e-17	9.05e-16	-	-	-	-	gi|356567040|ref|XP_003551731.1|/0/PREDICTED: uncharacterized protein LOC100785051 [Glycine max]
Glyma06g11050	1274	22	60	2.05233	5.46791	1.41373	Up	3.46e-05	0.00042782	-	-	-	-	gi|363806858|ref|NP_001242038.1|/2.17497e-156/uncharacterized protein LOC100802091 [Glycine max]
Glyma05g36210	1093	22	60	2.3922	6.37339	1.41373	Up	3.46e-05	0.000427942	K00588|1|8e-55|212|osa:4340240|caffeoyl-CoA O-methyltransferase [EC:2.1.1.104]	-	GO:0008171//O-methyltransferase activity;GO:0008171//O-methyltransferase activity	GO:0006730//one-carbon metabolic process	gi|363807954|ref|NP_001242455.1|/7.89565e-125/probable caffeoyl-CoA O-methyltransferase At4g26220-like [Glycine max]
Glyma10g02610	704	29	79	4.89576	13.0285	1.41207	Up	1.97e-06	3.23e-05	K03676|1|3e-24|110|bdi:100821530|glutaredoxin 3	GO:0044464//cell part	GO:0015036//disulfide oxidoreductase activity	GO:0019725//cellular homeostasis	gi|351724631|ref|NP_001237832.1|/2.1525e-51/uncharacterized protein LOC100527558 [Glycine max]
Glyma01g38905	764	131	356	20.3785	54.0999	1.40858	Up	4.24e-24	3.65e-22	-	-	-	-	gi|351721462|ref|NP_001236442.1|/1.99815e-24/uncharacterized protein LOC100527721 [Glycine max]
Glyma07g40250	2037	46	125	2.68387	7.12457	1.40849	Up	2.17e-09	5.72e-08	K14638|1|1e-105|382|ppp:PHYPADRAFT_189464|solute carrier family 15 (peptide/histidine transporter), member 3/4	GO:0031224//intrinsic to membrane	GO:0004871//signal transducer activity	GO:0015833//peptide transport	gi|356522117|ref|XP_003529696.1|/0/PREDICTED: probable peptide/nitrate transporter At1g59740-like [Glycine max]
Glyma20g25990	1238	44	119	4.22402	11.16	1.40165	Up	5.99e-09	1.5e-07	-	-	-	-	gi|356575621|ref|XP_003555937.1|/2.42702e-96/PREDICTED: uncharacterized protein LOC100792170 [Glycine max]
Glyma10g42190	1433	30	81	2.48811	6.56264	1.39923	Up	1.72e-06	2.86e-05	-	GO:0044424//intracellular part	GO:0005319//lipid transporter activity;GO:0008289//lipid binding	GO:0006869//lipid transport	gi|358249164|ref|NP_001240259.1|/3.95397e-109/uncharacterized protein LOC100818548 [Glycine max]
Glyma05g00761	3727	23	62	0.733437	1.9314	1.3969	Up	3.01e-05	0.000377517	K13415|1|2e-118|425|vvi:100252647|protein brassinosteroid insensitive 1 [EC:2.7.10.1 2.7.11.1]	GO:0043231//intracellular membrane-bounded organelle;GO:0016020//membrane;GO:0043231//intracellular membrane-bounded organelle;GO:0016020//membrane;GO:0043231//intracellular membrane-bounded organelle;GO:0016020//membrane;GO:0043231//intracellular membrane-bounded organelle;GO:0016020//membrane	GO:0004672//protein kinase activity;GO:0016787//hydrolase activity;GO:0000166//nucleotide binding;GO:0004672//protein kinase activity;GO:0016787//hydrolase activity;GO:0000166//nucleotide binding;GO:0004672//protein kinase activity;GO:0016787//hydrolase activity;GO:0032559;GO:0004672//protein kinase activity;GO:0016787//hydrolase activity;GO:0032559	GO:0009987//cellular process;GO:0009987//cellular process;GO:0006464//cellular protein modification process;GO:0007167//enzyme linked receptor protein signaling pathway;GO:0006464//cellular protein modification process;GO:0007167//enzyme linked receptor protein signaling pathway	gi|356513513|ref|XP_003525458.1|/0/PREDICTED: probable LRR receptor-like serine/threonine-protein kinase At1g74360-like [Glycine max]
Glyma17g15350	960	26	70	3.21882	8.46577	1.39511	Up	9.29e-06	0.000132208	K06892|1|7e-78|288|pop:POPTR_830724|	-	-	-	gi|356565372|ref|XP_003550915.1|/1.549e-134/PREDICTED: LOW QUALITY PROTEIN: probable iron/ascorbate oxidoreductase DDB_G0283291-like [Glycine max]
Glyma17g18230	1267	31	83	2.9079	7.60573	1.38711	Up	1.5e-06	2.52e-05	-	GO:0044464//cell part	GO:0005488//binding	GO:0009987//cellular process	gi|358249232|ref|NP_001239759.1|/1.81713e-62/uncharacterized protein LOC100782360 precursor [Glycine max]
Glyma02g41300	1584	40	107	3.00123	7.84275	1.38581	Up	4.6e-08	1.03e-06	K13448|1|1e-47|189|pop:POPTR_711309|calcium-binding protein CML	-	GO:0046872//metal ion binding;GO:0016491//oxidoreductase activity	-	gi|356501039|ref|XP_003519336.1|/5.01277e-76/PREDICTED: probable calcium-binding protein CML27-like [Glycine max]
Glyma06g00831	819	64	171	9.28732	24.2411	1.38412	Up	4.67e-12	1.71e-10	K14488|1|2e-42|170|mtr:MTR_3g117640|SAUR family protein	-	-	-	gi|357467469|ref|XP_003604019.1|/2.6413e-41/Auxin-induced protein 6B [Medicago truncatula]
Glyma06g42950	393	70	186	21.169	54.949	1.37614	Up	6.86e-13	2.73e-11	-	-	-	-	-
Glyma07g08311	1068	54	143	6.0092	15.5455	1.37125	Up	3.48e-10	1.01e-08	-	-	-	-	gi|356520457|ref|XP_003528878.1|/1.45516e-99/PREDICTED: BON1-associated protein 2-like [Glycine max]
Glyma17g38020	881	28	74	3.77726	9.75204	1.36837	Up	7.02e-06	0.000102802	K15692|1|5e-13|73.2|ppp:PHYPADRAFT_16563|E3 ubiquitin-protein ligase RNF13 [EC:6.3.2.19];K05283|2|4e-11|67.0|aly:ARALYDRAFT_354960|phosphatidylinositol glycan, class W [EC:2.3.-.-];K11982|4|6e-09|59.7|gmx:100787523|E3 ubiquitin-protein ligase RNF115/126 [EC:6.3.2.19]	-	GO:0046914//transition metal ion binding;GO:0019787//small conjugating protein ligase activity	GO:0032446//protein modification by small protein conjugation	gi|356564392|ref|XP_003550438.1|/5.57506e-72/PREDICTED: E3 ubiquitin-protein ligase ATL23-like [Glycine max]
Glyma13g43150	945	36	95	4.52757	11.6716	1.3662	Up	3.54e-07	6.8e-06	-	-	-	-	gi|356550506|ref|XP_003543627.1|/5.81233e-102/PREDICTED: uncharacterized protein LOC100802625 [Glycine max]
Glyma19g42220	3237	1044	2753	38.3312	98.7423	1.36515	Up	7.92e-167	1.8e-163	K13447|1|0.0|1643|gmx:100820185|respiratory burst oxidase [EC:1.6.3.- 1.11.1.-]	GO:0031224//intrinsic to membrane;GO:0031224//intrinsic to membrane	GO:0046914//transition metal ion binding;GO:0016209//antioxidant activity;GO:0050662//coenzyme binding;GO:0050664//oxidoreductase activity, acting on NAD(P)H, oxygen as acceptor;GO:0046914//transition metal ion binding;GO:0016209//antioxidant activity;GO:0050662//coenzyme binding;GO:0050664//oxidoreductase activity, acting on NAD(P)H, oxygen as acceptor	GO:0008152//metabolic process;GO:0008152//metabolic process	gi|356572992|ref|XP_003554649.1|/0/PREDICTED: respiratory burst oxidase homolog protein B-like isoform 1 [Glycine max]
Glyma16g29010	1968	63	166	3.80461	9.79316	1.36403	Up	1.61e-11	5.53e-10	-	-	-	-	gi|356559694|ref|XP_003548132.1|/3.13071e-110/PREDICTED: probable membrane-associated kinase regulator 6-like [Glycine max]
Glyma12g12230	4769	32	84	0.797475	2.04499	1.35858	Up	1.89e-06	3.11e-05	K05279|1|1e-59|231|aly:ARALYDRAFT_495497|flavonol 3-O-methyltransferase [EC:2.1.1.76];K16040|4|7e-57|221|vvi:100233030|trans-resveratrol di-O-methyltransferase [EC:2.1.1.240];K13066|5|7e-57|221|pop:POPTR_824484|caffeic acid 3-O-methyltransferase [EC:2.1.1.68]	-	GO:0008171//O-methyltransferase activity	-	gi|356542907|ref|XP_003539906.1|/0/PREDICTED: 3'-hydroxy-N-methyl-(S)-coclaurine 4'-O-methyltransferase-like [Glycine max]
Glyma12g03520	2286	193	505	10.034	25.6481	1.35395	Up	1.17e-31	1.47e-29	-	GO:0043231//intracellular membrane-bounded organelle	-	GO:0009628//response to abiotic stimulus;GO:0009628//response to abiotic stimulus	gi|356544820|ref|XP_003540845.1|/0/PREDICTED: uncharacterized membrane protein YMR155W-like [Glycine max]
Glyma16g05580	2372	23	60	1.15241	2.93681	1.3496	Up	6.4e-05	0.000738285	-	-	GO:0016747//transferase activity, transferring acyl groups other than amino-acyl groups;GO:0016747//transferase activity, transferring acyl groups other than amino-acyl groups	-	gi|356560448|ref|XP_003548504.1|/0/PREDICTED: acyltransferase-like protein At3g26840, chloroplastic-like [Glycine max]
Glyma20g12835	844	23	60	3.23877	8.2537	1.3496	Up	6.4e-05	0.000738088	K15283|1|2e-27|120|gmx:732611|solute carrier family 35, member E1	GO:0016020//membrane;GO:0009536//plastid	-	-	gi|356575068|ref|XP_003555664.1|/2.20519e-38/PREDICTED: triose phosphate/phosphate translocator, chloroplastic-like [Glycine max]
Glyma05g08240	978	33	86	4.01023	10.2094	1.34814	Up	1.64e-06	2.74e-05	-	GO:0043231//intracellular membrane-bounded organelle	-	-	gi|351725191|ref|NP_001235804.1|/3.29264e-55/uncharacterized protein LOC100306235 [Glycine max]
Glyma02g46171	579	123	320	25.2476	64.1669	1.34568	Up	1.85e-20	1.29e-18	-	-	-	-	gi|357494563|ref|XP_003617570.1|/3.04997e-09/hypothetical protein MTR_5g093050 [Medicago truncatula]
Glyma13g27650	1690	35	91	2.46136	6.25165	1.34478	Up	8.53e-07	1.51e-05	K01488|1|0.0|733|gmx:100803676|adenosine deaminase [EC:3.5.4.4]	-	GO:0016814//hydrolase activity, acting on carbon-nitrogen (but not peptide) bonds, in cyclic amidines;GO:0016814//hydrolase activity, acting on carbon-nitrogen (but not peptide) bonds, in cyclic amidines;GO:0016814//hydrolase activity, acting on carbon-nitrogen (but not peptide) bonds, in cyclic amidines	GO:0009127//purine nucleoside monophosphate biosynthetic process;GO:0009127//purine nucleoside monophosphate biosynthetic process;GO:0009127//purine nucleoside monophosphate biosynthetic process	gi|356548979|ref|XP_003542876.1|/0/PREDICTED: adenosine deaminase-like protein-like [Glycine max]
Glyma16g27950	2351	223	579	11.2732	28.5934	1.34279	Up	1.26e-35	1.89e-33	K09286|1|2e-21|103|ath:AT1G43160|EREBP-like factor	-	-	-	gi|356561412|ref|XP_003548975.1|/3.01617e-147/PREDICTED: uncharacterized protein LOC100817436 [Glycine max]
Glyma10g02710	1008	27	70	3.18345	8.06264	1.34066	Up	1.7e-05	0.000228149	-	-	-	-	gi|356535569|ref|XP_003536317.1|/8.47319e-54/PREDICTED: uncharacterized protein LOC100798818 [Glycine max]
Glyma12g05190	875	73	189	9.91538	25.078	1.33868	Up	1.35e-12	5.22e-11	-	-	-	-	gi|356545357|ref|XP_003541110.1|/2.9621e-25/PREDICTED: uncharacterized protein LOC100803664 [Glycine max]
Glyma08g21390	1354	63	163	5.52989	13.9768	1.33772	Up	4.8e-11	1.54e-09	K02866|1|1e-12|72.8|osa:4332737|large subunit ribosomal protein L10e	-	-	-	gi|363808074|ref|NP_001242215.1|/1.92389e-131/uncharacterized protein LOC100795218 precursor [Glycine max]
Glyma17g03950	2503	87	225	4.13098	10.4367	1.3371	Up	1.07e-14	5e-13	K13424|1|4e-25|115|zma:100281160|WRKY transcription factor 33	-	-	-	gi|356565246|ref|XP_003550853.1|/8.61983e-124/PREDICTED: probable WRKY transcription factor 23-like [Glycine max]
Glyma05g10130	1210	29	75	2.84844	7.19641	1.3371	Up	8.8e-06	0.000126075	K15634|1|2e-136|484|gmx:100802260|probable phosphoglycerate mutase [EC:5.4.2.1]	-	GO:0003824//catalytic activity	-	gi|356514015|ref|XP_003525703.1|/1.96678e-135/PREDICTED: probable phosphoglycerate mutase gpmB-like [Glycine max]
Glyma12g34680	301	101	261	39.8795	100.673	1.33596	Up	8.55e-17	4.75e-15	-	-	-	-	gi|356543984|ref|XP_003540436.1|/2.4591e-44/PREDICTED: uncharacterized protein LOC100777261 [Glycine max]
Glyma11g09060	1577	123	317	9.26975	23.3382	1.33209	Up	5.42e-20	3.68e-18	K00924|1|2e-121|434|ath:AT4G35600|[EC:2.7.1.-];K05658|4|4e-107|387|vvi:100262734|ATP-binding cassette, subfamily B (MDR/TAP), member 1	-	GO:0004713//protein tyrosine kinase activity;GO:0032559	GO:0006464//cellular protein modification process	gi|356540872|ref|XP_003538908.1|/0/PREDICTED: LOW QUALITY PROTEIN: probable serine/threonine-protein kinase Cx32, chloroplastic-like [Glycine max]
Glyma12g02540	1340	52	134	4.61204	11.6102	1.33192	Up	2.85e-09	7.41e-08	-	-	GO:0003676//nucleic acid binding	GO:0009887//organ morphogenesis;GO:0008361//regulation of cell size;GO:0003006//developmental process involved in reproduction;GO:0009743//response to carbohydrate stimulus	gi|351727298|ref|NP_001236900.1|/6.10309e-157/NAC domain protein NAC6 [Glycine max]
Glyma09g03690	1629	30	77	2.18874	5.48794	1.32616	Up	7.61e-06	0.00011093	K09422|1|1e-88|325|pop:POPTR_564352|myb proto-oncogene protein, plant	-	-	-	gi|356529079|ref|XP_003533124.1|/2.78908e-154/PREDICTED: uncharacterized protein LOC100805341 [Glycine max]
Glyma04g38560	1618	435	1114	31.9525	79.9367	1.32293	Up	1.76e-65	6.34e-63	-	-	-	-	gi|356508929|ref|XP_003523205.1|/2.03414e-173/PREDICTED: NAC domain-containing protein 2-like [Glycine max]
Glyma02g06640	1325	76	194	6.81698	16.9991	1.31825	Up	1.26e-12	4.91e-11	K13648|1|5e-14|77.4|sbi:SORBI_05g022970|alpha-1,4-galacturonosyltransferase [EC:2.4.1.43]	-	GO:0016740//transferase activity	-	gi|356502195|ref|XP_003519906.1|/0/PREDICTED: probable galacturonosyltransferase-like 2-like [Glycine max]
Glyma05g35220	1428	58	148	4.82719	12.033	1.31774	Up	5.9e-10	1.66e-08	K01056|1|2e-137|487|gmx:100526866|peptidyl-tRNA hydrolase, PTH1 family [EC:3.1.1.29]	GO:0009536//plastid	GO:0004091//carboxylesterase activity	GO:0010467//gene expression	gi|356513117|ref|XP_003525260.1|/2.88855e-136/PREDICTED: peptidyl-tRNA hydrolase, chloroplastic [Glycine max]
Glyma11g03910	1654	40	102	2.87421	7.15986	1.31676	Up	2.88e-07	5.63e-06	K09286|1|4e-53|207|ath:AT4G17500|EREBP-like factor;K14517|2|5e-45|180|ath:AT5G47220|ethylene-responsive transcription factor 2	-	-	GO:0006351//transcription, DNA-dependent	gi|356540552|ref|XP_003538752.1|/1.21129e-104/PREDICTED: ethylene-responsive transcription factor 1A-like [Glycine max]
Glyma13g07610	1024	53	135	6.15135	15.3064	1.31516	Up	3.54e-09	9.12e-08	K01602|1|2e-103|374|gmx:100500504|ribulose-bisphosphate carboxylase small chain [EC:4.1.1.39]	GO:0009536//plastid	GO:0016491//oxidoreductase activity;GO:0016831//carboxy-lyase activity	GO:0043094;GO:0015977//carbon fixation	gi|351725817|ref|NP_001235314.1|/2.25133e-102/uncharacterized protein LOC100500504 [Glycine max]
Glyma13g02231	769	125	318	19.3187	48.011	1.31337	Up	1.19e-19	7.9e-18	-	-	-	-	gi|356548437|ref|XP_003542608.1|/5.87449e-40/PREDICTED: uncharacterized protein LOC100500309 [Glycine max]
Glyma15g14860	1638	24	61	1.74137	4.3237	1.31204	Up	7.99e-05	0.000899123	K13424|1|2e-25|115|pop:POPTR_577093|WRKY transcription factor 33	-	-	GO:0050896//response to stimulus;GO:0050896//response to stimulus	gi|356558117|ref|XP_003547354.1|/5.85794e-152/PREDICTED: probable WRKY transcription factor 48-like [Glycine max]
Glyma13g22160	1110	37	94	3.96162	9.83206	1.3114	Up	9.18e-07	1.62e-05	-	GO:0009534//chloroplast thylakoid	GO:0015036//disulfide oxidoreductase activity	GO:0019725//cellular homeostasis	gi|356546087|ref|XP_003541463.1|/1.98832e-147/PREDICTED: uncharacterized protein LOC100792004 [Glycine max]
Glyma14g09970	883	67	170	9.01796	22.3526	1.30957	Up	3.88e-11	1.26e-09	-	GO:0016020//membrane	-	-	gi|356554016|ref|XP_003545346.1|/4.87883e-92/PREDICTED: uncharacterized protein LOC100803346 [Glycine max]
Glyma06g19870	1146	32	81	3.31864	8.20616	1.30612	Up	5.67e-06	8.45e-05	K14492|1|2e-65|247|rcu:RCOM_1512800|two-component response regulator ARR-A family	GO:0043231//intracellular membrane-bounded organelle	GO:0005488//binding;GO:0004871//signal transducer activity	GO:0009755//hormone-mediated signaling pathway;GO:0006351//transcription, DNA-dependent	gi|356516718|ref|XP_003527040.1|/6.35437e-104/PREDICTED: two-component response regulator ARR6-like [Glycine max]
Glyma18g20500	2644	75	189	3.37128	8.29927	1.29969	Up	4.23e-12	1.56e-10	K13416|1|9e-45|180|rcu:RCOM_1534760|brassinosteroid insensitive 1-associated receptor kinase 1 [EC:2.7.10.1 2.7.11.1];K13417|4|2e-43|176|aly:ARALYDRAFT_899604|somatic embryogenesis receptor kinase 4 [EC:2.7.10.1 2.7.11.1];K04733|5|2e-43|176|smo:SELMODRAFT_159261|interleukin-1 receptor-associated kinase 4 [EC:2.7.11.1]	GO:0016020//membrane;GO:0016020//membrane	GO:0004672//protein kinase activity;GO:0032559;GO:0004672//protein kinase activity;GO:0032559	GO:0006464//cellular protein modification process;GO:0006464//cellular protein modification process	gi|356567656|ref|XP_003552033.1|/0/PREDICTED: cysteine-rich receptor-like protein kinase 3-like [Glycine max]
Glyma12g34660	1004	954	2403	112.93	277.882	1.29904	Up	2.74e-135	4.09e-132	-	-	-	-	gi|356543982|ref|XP_003540435.1|/2.15944e-33/PREDICTED: uncharacterized protein LOC100776723 [Glycine max]
Glyma10g28300	1236	33	83	3.17314	7.79649	1.29691	Up	4.88e-06	7.38e-05	-	GO:0031410//cytoplasmic vesicle	-	-	gi|356534973|ref|XP_003536025.1|/4.51098e-18/PREDICTED: hydrophobic protein LTI6A-like [Glycine max]
Glyma02g34670	866	858	2155	117.751	288.914	1.29491	Up	6.17e-121	6.36e-118	-	-	-	GO:0045333//cellular respiration	gi|255571994|ref|XP_002526938.1|/8.78631e-46/hypothetical protein RCOM_0530890 [Ricinus communis]
Glyma07g30950	1144	184	462	19.1155	46.8873	1.29445	Up	2.9e-27	3e-25	-	-	-	-	gi|356521299|ref|XP_003529294.1|/6.80975e-82/PREDICTED: F-box protein At1g61340-like [Glycine max]
Glyma18g42730	2679	47	118	2.08506	5.11386	1.29432	Up	5.05e-08	1.12e-06	K08286|1|9e-82|303|aly:ARALYDRAFT_491919|protein-serine/threonine kinase [EC:2.7.11.-];K13415|3|2e-80|299|sbi:SORBI_03g012040|protein brassinosteroid insensitive 1 [EC:2.7.10.1 2.7.11.1]	-	-	-	gi|356566656|ref|XP_003551546.1|/0/PREDICTED: probable LRR receptor-like serine/threonine-protein kinase At4g08850-like [Glycine max]
Glyma17g09610	2458	32	80	1.54726	3.77875	1.28819	Up	8.11e-06	0.000117674	-	-	-	-	gi|356562722|ref|XP_003549618.1|/0/PREDICTED: uncharacterized protein LOC100781639 [Glycine max]
Glyma16g03960	714	84	210	13.9822	34.1476	1.28819	Up	3.99e-13	1.63e-11	-	-	-	-	gi|356560801|ref|XP_003548675.1|/2.08599e-49/PREDICTED: uncharacterized protein LOC100809764 [Glycine max]
Glyma13g31010	1656	206	515	14.7843	36.1066	1.28819	Up	5.41e-30	6.41e-28	K09286|1|3e-25|115|pop:POPTR_707534|EREBP-like factor;K03021|2|4e-25|114|smo:SELMODRAFT_443461|DNA-directed RNA polymerase III subunit RPC2 [EC:2.7.7.6]	-	-	-	gi|356549303|ref|XP_003543033.1|/1.06614e-92/PREDICTED: ethylene-responsive transcription factor 12-like [Glycine max]
Glyma11g33985	795	28	70	4.18587	10.2228	1.28819	Up	3.04e-05	0.000380646	K00924|1|1e-70|264|osa:4337593|[EC:2.7.1.-];K05658|4|2e-58|223|vvi:100262734|ATP-binding cassette, subfamily B (MDR/TAP), member 1	-	GO:0004672//protein kinase activity;GO:0032559	GO:0006464//cellular protein modification process	gi|356537920|ref|XP_003537454.1|/3.48625e-107/PREDICTED: protein kinase APK1B, chloroplastic-like [Glycine max]
Glyma13g35550	1510	159	396	12.5145	30.4479	1.28274	Up	2.75e-23	2.27e-21	-	-	GO:0003676//nucleic acid binding	-	gi|351721073|ref|NP_001238221.1|/0/NAC domain protein [Glycine max]
Glyma03g35950	624	27	67	5.14249	12.4661	1.27747	Up	5.07e-05	0.000599442	K08488|1|7e-18|88.6|ath:AT1G32270|syntaxin 7	-	-	-	gi|356503846|ref|XP_003520713.1|/1.42341e-106/PREDICTED: uncharacterized protein LOC100806990 [Glycine max]
Glyma14g04420	1736	27	67	1.84845	4.4809	1.27747	Up	5.07e-05	0.000599278	K04733|1|3e-139|493|pop:POPTR_878434|interleukin-1 receptor-associated kinase 4 [EC:2.7.11.1];K00924|2|3e-124|444|ath:AT1G14370|[EC:2.7.1.-]	GO:0043231//intracellular membrane-bounded organelle	GO:0004672//protein kinase activity;GO:0032559	GO:0006464//cellular protein modification process	gi|357493723|ref|XP_003617150.1|/7.92569e-179/Protein kinase 2B [Medicago truncatula]
Glyma18g52730	858	151	373	20.9163	50.4732	1.27089	Up	9.88e-22	7.48e-20	-	-	GO:0046872//metal ion binding	-	gi|356569006|ref|XP_003552698.1|/1.97496e-66/PREDICTED: uncharacterized protein LOC100791068 [Glycine max]
Glyma13g37770	851	147	363	20.5297	49.5241	1.27042	Up	3.53e-21	2.6e-19	-	-	-	-	gi|356549968|ref|XP_003543362.1|/3.97612e-27/PREDICTED: uncharacterized protein LOC100796236 [Glycine max]
Glyma08g18230	609	60	148	11.7092	28.2153	1.26883	Up	1.81e-09	4.83e-08	-	-	-	-	gi|356528702|ref|XP_003532938.1|/1.89577e-28/PREDICTED: uncharacterized protein LOC100811368 [Glycine max]
Glyma13g22540	1284	103	254	9.53381	22.9672	1.26845	Up	3.08e-15	1.52e-13	-	-	-	-	gi|356548473|ref|XP_003542626.1|/1.00982e-60/PREDICTED: uncharacterized protein LOC100804202 [Glycine max]
Glyma15g09140	333	93	229	33.192	79.8419	1.26631	Up	7.55e-14	3.26e-12	-	-	-	GO:0045333//cellular respiration	gi|356555437|ref|XP_003546038.1|/2.30764e-26/PREDICTED: uncharacterized protein LOC100500622 [Glycine max]
Glyma07g05700	1954	26	64	1.58141	3.80273	1.26583	Up	8.45e-05	0.000943783	K00924|1|2e-165|580|ath:AT1G30270|[EC:2.7.1.-];K07198|3|8e-70|263|aly:ARALYDRAFT_484683|5'-AMP-activated protein kinase, catalytic alpha subunit [EC:2.7.11.11]	-	GO:0004672//protein kinase activity;GO:0032559;GO:0004672//protein kinase activity;GO:0032559	GO:0009267//cellular response to starvation;GO:0009743//response to carbohydrate stimulus;GO:0006813//potassium ion transport;GO:0023052//signaling;GO:0006970//response to osmotic stress;GO:0006464//cellular protein modification process;GO:0009267//cellular response to starvation;GO:0009743//response to carbohydrate stimulus;GO:0006813//potassium ion transport;GO:0023052//signaling;GO:0006970//re…	gi|356520233|ref|XP_003528768.1|/0/PREDICTED: CBL-interacting serine/threonine-protein kinase 9-like [Glycine max]
Glyma01g04791	4821	146	359	3.59923	8.64564	1.26428	Up	8.12e-21	5.81e-19	K12813|1|0.0|1576|gmx:100809559|pre-mRNA-splicing factor ATP-dependent RNA helicase DHX16 [EC:3.6.4.13]	GO:0044464//cell part;GO:0044464//cell part;GO:0044464//cell part	GO:0042623//ATPase activity, coupled;GO:0003724//RNA helicase activity;GO:0032559;GO:0042623//ATPase activity, coupled;GO:0003724//RNA helicase activity;GO:0032559;GO:0042623//ATPase activity, coupled;GO:0003724//RNA helicase activity;GO:0032559	GO:0006396//RNA processing;GO:0016441//posttranscriptional gene silencing;GO:0003006//developmental process involved in reproduction;GO:0006396//RNA processing;GO:0016441//posttranscriptional gene silencing;GO:0003006//developmental process involved in reproduction;GO:0006396//RNA processing;GO:0016441//posttranscriptional gene silencing;GO:0003006//developmental process involved in reproduction	gi|356516849|ref|XP_003527105.1|/0/PREDICTED: putative pre-mRNA-splicing factor ATP-dependent RNA helicase DHX16 isoform 1 [Glycine max]
Glyma05g32993	1648	35	86	2.52409	6.05872	1.26325	Up	5.15e-06	7.76e-05	K14488|1|2e-40|165|gmx:100306557|SAUR family protein	GO:0043231//intracellular membrane-bounded organelle	GO:0005515//protein binding	GO:0009755//hormone-mediated signaling pathway	gi|351721577|ref|NP_001236702.1|/2.32164e-39/uncharacterized protein LOC100306557 [Glycine max]
Glyma20g24600	1529	35	86	2.72054	6.53026	1.26325	Up	5.15e-06	7.75e-05	-	GO:0043231//intracellular membrane-bounded organelle	GO:0003676//nucleic acid binding;GO:0001071//nucleic acid binding transcription factor activity	GO:0006351//transcription, DNA-dependent	gi|351725743|ref|NP_001237103.1|/2.86931e-137/syringolide-induced protein 1-3-1B [Glycine max]
Glyma06g09370	1839	44	108	2.84358	6.81839	1.26172	Up	3.24e-07	6.28e-06	-	-	-	-	gi|356518380|ref|XP_003527857.1|/0/PREDICTED: putative lipase ROG1-like [Glycine max]
Glyma01g04340	1869	147	360	9.34765	22.3631	1.25845	Up	9.88e-21	7.02e-19	K14963|1|3e-16|85.5|rcu:RCOM_0188680|COMPASS component SWD3	-	GO:0016740//transferase activity	-	gi|356497798|ref|XP_003517744.1|/0/PREDICTED: uncharacterized WD repeat-containing protein alr3466-like [Glycine max]
Glyma14g08000	1314	601	1470	54.3593	129.886	1.25665	Up	2.19e-79	1.2e-76	-	-	-	-	gi|363814457|ref|NP_001242863.1|/5.38872e-142/uncharacterized protein LOC100795383 [Glycine max]
Glyma08g16050	1131	78	190	8.19646	19.5043	1.25072	Up	1.55e-11	5.33e-10	-	-	-	-	gi|255630536|gb|ACU15626.1|/1.42382e-15/unknown [Glycine max]
Glyma19g39960	1232	30	73	2.89404	6.87942	1.2492	Up	3.19e-05	0.000397935	K05283|1|2e-12|72.0|aly:ARALYDRAFT_354960|phosphatidylinositol glycan, class W [EC:2.3.-.-];K11982|2|1e-09|62.8|mtr:MTR_5g088720|E3 ubiquitin-protein ligase RNF115/126 [EC:6.3.2.19]	GO:0005840//ribosome;GO:0043231//intracellular membrane-bounded organelle	GO:0005488//binding	GO:0009743//response to carbohydrate stimulus;GO:0007275//multicellular organismal development	gi|356572748|ref|XP_003554528.1|/2.1747e-105/PREDICTED: RING-H2 finger protein ATL5-like [Glycine max]
Glyma01g37090	1471	164	399	13.2503	31.492	1.24896	Up	1.47e-22	1.16e-20	K03686|1|2e-12|72.4|smo:SELMODRAFT_167519|molecular chaperone DnaJ	-	GO:0005515//protein binding	GO:0044267//cellular protein metabolic process	gi|356496637|ref|XP_003517172.1|/2.19517e-78/PREDICTED: chaperone protein dnaJ 11, chloroplastic-like [Glycine max]
Glyma06g35710	1243	44	107	4.20703	9.9943	1.2483	Up	4.58e-07	8.63e-06	K09286|1|6e-21|100|aly:ARALYDRAFT_494572|EREBP-like factor	GO:0044451//nucleoplasm part	GO:0005488//binding;GO:0001071//nucleic acid binding transcription factor activity	GO:0009743//response to carbohydrate stimulus;GO:0002218//activation of innate immune response;GO:0006351//transcription, DNA-dependent;GO:0009873//ethylene mediated signaling pathway	gi|356517102|ref|XP_003527229.1|/2.38932e-59/PREDICTED: ethylene-responsive transcription factor 4-like [Glycine max]
Glyma10g28990	2233	33	80	1.75638	4.1595	1.2438	Up	1.41e-05	0.000193096	K02183|1|3e-67|254|aly:ARALYDRAFT_495855|calmodulin	-	-	-	gi|356533552|ref|XP_003535327.1|/0/PREDICTED: uncharacterized protein LOC100806598 [Glycine max]
Glyma09g01720	1959	57	138	3.45808	8.1787	1.2419	Up	1.13e-08	2.72e-07	K01115|1|3e-06|52.0|vvi:100241982|phospholipase D [EC:3.1.4.4]	GO:0043231//intracellular membrane-bounded organelle;GO:0016020//membrane;GO:0043231//intracellular membrane-bounded organelle;GO:0016020//membrane	-	-	gi|351724939|ref|NP_001237331.1|/4.79181e-87/uncharacterized protein LOC100499880 [Glycine max]
Glyma14g01440	1774	156	377	10.4512	24.6733	1.23929	Up	3.67e-21	2.7e-19	K03686|1|3e-12|72.0|ath:AT2G22360|molecular chaperone DnaJ	-	GO:0005515//protein binding	-	gi|356552398|ref|XP_003544555.1|/8.35214e-75/PREDICTED: chaperone protein dnaJ 11, chloroplastic-like [Glycine max]
Glyma01g20860	1966	58	140	3.50622	8.26769	1.23757	Up	9.73e-09	2.36e-07	K03453|1|7e-12|70.9|vcn:VOLCADRAFT_102664|bile acid:Na+ symporter, BASS family	-	-	-	gi|358249016|ref|NP_001239723.1|/0/uncharacterized protein LOC100812818 [Glycine max]
Glyma19g05580	2009	34	82	2.01138	4.73886	1.23636	Up	1.21e-05	0.000168076	K00318|1|0.0|856|gmx:100797464|proline dehydrogenase [EC:1.5.99.8]	-	GO:0016645//oxidoreductase activity, acting on the CH-NH group of donors	GO:0006560//proline metabolic process;GO:0006536//glutamate metabolic process	gi|356573859|ref|XP_003555073.1|/0/PREDICTED: proline dehydrogenase 2, mitochondrial-like [Glycine max]
Glyma17g11340	1254	32	77	3.03282	7.12907	1.23305	Up	2.34e-05	0.000302432	-	-	-	-	gi|351722002|ref|NP_001236205.1|/1.90853e-64/uncharacterized protein LOC100500311 [Glycine max]
Glyma02g35570	1260	32	77	3.01838	7.09512	1.23305	Up	2.34e-05	0.000302342	-	-	-	-	gi|356500599|ref|XP_003519119.1|/1.00489e-113/PREDICTED: uncharacterized protein LOC100812853 isoform 1 [Glycine max]
Glyma18g15001	1672	89	214	6.32628	14.8599	1.232	Up	1.51e-12	5.8e-11	-	-	-	-	gi|356567511|ref|XP_003551962.1|/4.10907e-92/PREDICTED: uncharacterized protein LOC100792469 [Glycine max]
Glyma06g42935	798	57	137	8.48919	19.9323	1.23141	Up	1.6e-08	3.74e-07	-	-	-	-	-
Glyma12g36161	3487	30	72	1.0225	2.39729	1.2293	Up	4.53e-05	0.000542499	K04733|1|3e-44|179|smo:SELMODRAFT_159261|interleukin-1 receptor-associated kinase 4 [EC:2.7.11.1];K13430|4|2e-43|176|vvi:100254113|serine/threonine-protein kinase PBS1 [EC:2.7.11.1]	-	GO:0005488//binding;GO:0004871//signal transducer activity;GO:0004672//protein kinase activity;GO:0005488//binding;GO:0004672//protein kinase activity	GO:0008152//metabolic process	gi|356542336|ref|XP_003539623.1|/0/PREDICTED: probable LRR receptor-like serine/threonine-protein kinase At1g53430-like [Glycine max]
Glyma04g35190	3786	85	204	2.66829	6.25589	1.2293	Up	5.42e-12	1.97e-10	K16055|1|0.0|1768|gmx:100787744|trehalose 6-phosphate synthase/phosphatase [EC:2.4.1.15 3.1.3.12]	-	GO:0019203//carbohydrate phosphatase activity;GO:0035251//UDP-glucosyltransferase activity;GO:0019203//carbohydrate phosphatase activity;GO:0035251//UDP-glucosyltransferase activity;GO:0019203//carbohydrate phosphatase activity;GO:0035251//UDP-glucosyltransferase activity;GO:0019203//carbohydrate phosphatase activity;GO:0035251//UDP-glucosyltransferase activity	GO:0005991//trehalose metabolic process;GO:0005991//trehalose metabolic process;GO:0005991//trehalose metabolic process;GO:0005991//trehalose metabolic process	gi|356508657|ref|XP_003523071.1|/0/PREDICTED: probable alpha,alpha-trehalose-phosphate synthase [UDP-forming] 9-like [Glycine max]
Glyma15g41130	1421	30	72	2.50912	5.88272	1.2293	Up	4.53e-05	0.000542649	K14488|1|1e-62|238|gmx:100793103|SAUR family protein	-	-	GO:0009725//response to hormone stimulus	gi|356556995|ref|XP_003546804.1|/1.77904e-61/PREDICTED: auxin-induced protein X15-like [Glycine max]
Glyma11g35870	851	246	590	34.3558	80.4937	1.22832	Up	8.49e-32	1.08e-29	-	GO:0031224//intrinsic to membrane	-	-	gi|351727040|ref|NP_001236635.1|/7.95606e-52/uncharacterized protein LOC100500345 [Glycine max]
Glyma20g32601	740	53	127	8.51214	19.9256	1.22703	Up	5.82e-08	1.27e-06	-	-	-	GO:0009725//response to hormone stimulus;GO:0003006//developmental process involved in reproduction	gi|356576271|ref|XP_003556256.1|/1.44791e-40/PREDICTED: protein IDA-LIKE 1-like [Glycine max]
Glyma01g31730	876	187	447	25.3707	59.2438	1.2235	Up	2.44e-24	2.15e-22	-	-	-	-	gi|356496265|ref|XP_003516989.1|/5.31269e-72/PREDICTED: disease resistance response protein 206-like [Glycine max]
Glyma13g19570	1069	41	98	4.55828	10.6436	1.22342	Up	2.05e-06	3.35e-05	-	-	-	-	gi|351726914|ref|NP_001235351.1|/9.47595e-83/uncharacterized protein LOC100526874 [Glycine max]
Glyma04g05720	811	126	301	18.4648	43.0909	1.22261	Up	7.16e-17	3.99e-15	K13993|1|5e-70|262|gmx:100777239|HSP20 family protein	-	-	-	gi|351720919|ref|NP_001237960.1|/4.8465e-88/uncharacterized protein LOC100306126 [Glycine max]
Glyma03g14040	2384	103	246	5.13482	11.9803	1.22228	Up	4.72e-14	2.07e-12	-	-	GO:0005488//binding	-	gi|356504278|ref|XP_003520924.1|/3.18882e-128/PREDICTED: uncharacterized protein LOC100802736 [Glycine max]
Glyma09g29360	1244	813	1941	77.672	181.153	1.22174	Up	8.5e-100	6.24e-97	-	-	-	-	gi|356531070|ref|XP_003534101.1|/4.90182e-113/PREDICTED: miraculin-like [Glycine max]
Glyma10g00930	1341	55	131	4.87448	11.3418	1.21833	Up	4.28e-08	9.58e-07	K09422|1|7e-141|498|gmx:100806975|myb proto-oncogene protein, plant	GO:0043231//intracellular membrane-bounded organelle	GO:0003676//nucleic acid binding	-	gi|5139802|dbj|BAA81730.1|/8.88166e-140/GmMYB29A1 [Glycine max]
Glyma19g42000	1176	194	462	19.606	45.6115	1.2181	Up	6.13e-25	5.68e-23	-	-	GO:0003824//catalytic activity;GO:0003824//catalytic activity	-	gi|356572962|ref|XP_003554634.1|/7.76129e-141/PREDICTED: epoxide hydrolase 2-like [Glycine max]
Glyma12g36300	875	58	138	7.87797	18.3109	1.21681	Up	1.92e-08	4.47e-07	K15382|1|2e-109|393|gmx:100776187|solute carrier family 50 (sugar transporter)	GO:0016021//integral to membrane	-	GO:0006810//transport	gi|356544144|ref|XP_003540515.1|/2.79676e-108/PREDICTED: bidirectional sugar transporter SWEET2-like [Glycine max]
Glyma04g40350	935	98	233	12.4569	28.9324	1.21574	Up	2.76e-13	1.14e-11	-	-	-	-	gi|356509120|ref|XP_003523300.1|/3.09728e-31/PREDICTED: uncharacterized protein LOC100820369 [Glycine max]
Glyma17g05770	1475	306	726	24.6561	57.1458	1.2127	Up	5.26e-38	8.53e-36	K05894|1|5e-154|542|osa:4345762|12-oxophytodienoic acid reductase [EC:1.3.1.42]	GO:0042579//microbody	GO:0016628//oxidoreductase activity, acting on the CH-CH group of donors, NAD or NADP as acceptor;GO:0000166//nucleotide binding	GO:0006633//fatty acid biosynthetic process	gi|356565802|ref|XP_003551126.1|/0/PREDICTED: 12-oxophytodienoate reductase 3-like [Glycine max]
Glyma13g10791	1467	78	185	6.31915	14.6414	1.21225	Up	8.48e-11	2.66e-09	K14709|1|3e-153|540|gmx:100789557|solute carrier family 39 (zinc transporter), member 1/2/3	GO:0016020//membrane	GO:0046873//metal ion transmembrane transporter activity	GO:0006829//zinc ion transport	gi|356547541|ref|XP_003542170.1|/3.89619e-152/PREDICTED: zinc transporter 5-like [Glycine max]
Glyma13g44630	1625	70	166	5.11964	11.8603	1.21202	Up	7.91e-10	2.19e-08	-	-	-	-	gi|356547460|ref|XP_003542130.1|/8.81105e-92/PREDICTED: uncharacterized protein LOC100810953 [Glycine max]
Glyma11g06430	838	561	1326	79.5634	183.713	1.20727	Up	1.63e-67	6.65e-65	-	-	-	-	gi|351721462|ref|NP_001236442.1|/4.41501e-39/uncharacterized protein LOC100527721 [Glycine max]
Glyma05g21360	1152	36	85	3.71402	8.56655	1.20573	Up	1.25e-05	0.000172843	-	-	-	GO:0009628//response to abiotic stimulus	gi|351728027|ref|NP_001236413.1|/2.79936e-67/uncharacterized protein LOC100526951 precursor [Glycine max]
Glyma10g42171	1259	97	229	9.15673	21.1178	1.20556	Up	6.26e-13	2.51e-11	-	-	-	-	gi|356536320|ref|XP_003536687.1|/1.73407e-73/PREDICTED: uncharacterized protein LOC100817478 [Glycine max]
Glyma03g26530	690	53	125	9.12896	21.033	1.20413	Up	1.15e-07	2.38e-06	K09286|1|1e-14|78.2|ath:AT4G17500|EREBP-like factor;K14517|2|1e-14|78.2|ath:AT5G47220|ethylene-responsive transcription factor 2	-	-	GO:0006351//transcription, DNA-dependent	gi|356523030|ref|XP_003530145.1|/2.14863e-48/PREDICTED: ethylene-responsive transcription factor 13-like [Glycine max]
Glyma17g07570	1201	56	132	5.54165	12.7606	1.20331	Up	5.14e-08	1.13e-06	-	-	-	-	gi|356562499|ref|XP_003549508.1|/4.25654e-82/PREDICTED: uncharacterized protein LOC100811571 [Glycine max]
Glyma01g43460	1575	223	524	16.8275	38.627	1.19879	Up	2.06e-27	2.14e-25	K14497|1|6e-161|565|gmx:100785905|protein phosphatase 2C [EC:3.1.3.16]	-	GO:0016787//hydrolase activity	-	gi|356495717|ref|XP_003516720.1|/7.2954e-160/PREDICTED: probable protein phosphatase 2C 8-like [Glycine max]
Glyma06g20370	3270	133	312	4.83391	11.0776	1.19639	Up	6.73e-17	3.75e-15	K05643|1|5e-61|234|ppp:PHYPADRAFT_221752|ATP-binding cassette, subfamily A (ABC1), member 3;K05641|5|2e-56|219|ota:Ot18g01460|ATP-binding cassette, subfamily A (ABC1), member 1	-	GO:0042626//ATPase activity, coupled to transmembrane movement of substances;GO:0032559	GO:0009207	gi|356508588|ref|XP_003523037.1|/0/PREDICTED: ABC transporter A family member 7-like [Glycine max]
Glyma03g37210	1964	44	103	2.6626	6.08885	1.19334	Up	1.8e-06	2.98e-05	K05666|1|2e-07|56.2|olu:OSTLU_35503|ATP-binding cassette, subfamily C (CFTR/MRP), member 2	-	GO:0046914//transition metal ion binding;GO:0019787//small conjugating protein ligase activity;GO:0046914//transition metal ion binding;GO:0019787//small conjugating protein ligase activity	GO:0010035//response to inorganic substance;GO:0032446//protein modification by small protein conjugation;GO:0033554//cellular response to stress;GO:0009696//salicylic acid metabolic process;GO:0009814//defense response, incompatible interaction;GO:0010033//response to organic substance;GO:0010035//response to inorganic substance;GO:0032446//protein modification by small protein conjugation;GO:00…	gi|356505572|ref|XP_003521564.1|/0/PREDICTED: E3 ubiquitin-protein ligase BAH1-like isoform 1 [Glycine max]
Glyma02g37680	1478	147	343	11.8205	26.9438	1.18866	Up	2.96e-18	1.79e-16	-	-	-	-	gi|356500760|ref|XP_003519199.1|/2.74731e-129/PREDICTED: putative DNA-binding protein ESCAROLA-like [Glycine max]
Glyma08g09670	1845	54	126	3.4785	7.92892	1.18866	Up	1.37e-07	2.82e-06	K01580|1|0.0|924|gmx:100782330|glutamate decarboxylase [EC:4.1.1.15]	-	GO:0016831//carboxy-lyase activity;GO:0048037//cofactor binding	GO:0009064//glutamine family amino acid metabolic process	gi|356525016|ref|XP_003531123.1|/0/PREDICTED: glutamate decarboxylase 1-like [Glycine max]
Glyma07g09600	608	217	506	42.418	96.6244	1.18771	Up	3.66e-26	3.6e-24	-	GO:0031224//intrinsic to membrane	-	-	gi|255633846|gb|ACU17284.1|/4.34016e-49/unknown [Glycine max]
Glyma08g27620	777	393	916	60.1127	136.872	1.18709	Up	5.5e-46	1.15e-43	-	GO:0031410//cytoplasmic vesicle	-	-	gi|356526540|ref|XP_003531875.1|/2.35632e-44/PREDICTED: uncharacterized protein LOC100527287 [Glycine max]
Glyma09g32200	583	185	431	37.7136	85.8318	1.18643	Up	1.75e-22	1.39e-20	-	-	-	-	gi|356531255|ref|XP_003534193.1|/8.16391e-24/PREDICTED: arabinogalactan peptide 22-like [Glycine max]
Glyma16g26940	1770	58	135	3.89448	8.85524	1.1851	Up	5.27e-08	1.16e-06	K00261|1|0.0|830|gmx:100777869|glutamate dehydrogenase (NAD(P)+) [EC:1.4.1.3]	GO:0043231//intracellular membrane-bounded organelle	GO:0046914//transition metal ion binding;GO:0016639//oxidoreductase activity, acting on the CH-NH2 group of donors, NAD or NADP as acceptor;GO:0032559	GO:0019222//regulation of metabolic process;GO:0009642//response to light intensity;GO:0006970//response to osmotic stress;GO:0019752//carboxylic acid metabolic process;GO:0010038//response to metal ion	gi|356559551|ref|XP_003548062.1|/0/PREDICTED: glutamate dehydrogenase B-like [Glycine max]
Glyma13g23310	1784	123	286	8.19416	18.6128	1.18362	Up	2.24e-15	1.12e-13	-	-	-	-	gi|356548553|ref|XP_003542665.1|/1.69387e-75/PREDICTED: uncharacterized protein LOC100781021 [Glycine max]
Glyma16g24570	1372	80	186	6.92995	15.7398	1.1835	Up	1.69e-10	5.11e-09	-	-	GO:0016787//hydrolase activity;GO:0004713//protein tyrosine kinase activity;GO:0016803	-	gi|358248418|ref|NP_001240134.1|/0/uncharacterized protein LOC100809053 [Glycine max]
Glyma06g07210	1669	31	72	2.2075	5.00859	1.182	Up	7.67e-05	0.000866725	-	-	-	-	gi|351724999|ref|NP_001237589.1|/1.6195e-64/uncharacterized protein LOC100499896 precursor [Glycine max]
Glyma07g15480	1745	513	1189	34.9395	79.109	1.17898	Up	1.5e-58	4.22e-56	K05933|1|9e-179|625|gmx:100785514|aminocyclopropanecarboxylate oxidase [EC:1.14.17.4]	GO:0043231//intracellular membrane-bounded organelle;GO:0044444//cytoplasmic part;GO:0005576//extracellular region;GO:0016020//membrane;GO:0043231//intracellular membrane-bounded organelle;GO:0044444//cytoplasmic part;GO:0005576//extracellular region;GO:0016020//membrane	GO:0003729//mRNA binding;GO:0046914//transition metal ion binding;GO:0016641//oxidoreductase activity, acting on the CH-NH2 group of donors, oxygen as acceptor;GO:0016836//hydro-lyase activity;GO:0003729//mRNA binding;GO:0046914//transition metal ion binding;GO:0016641//oxidoreductase activity, acting on the CH-NH2 group of donors, oxygen as acceptor;GO:0016836//hydro-lyase activity	GO:0010039//response to iron ion;GO:0009692;GO:0006970//response to osmotic stress;GO:0072350//tricarboxylic acid metabolic process;GO:0010039//response to iron ion;GO:0009692;GO:0006970//response to osmotic stress;GO:0072350//tricarboxylic acid metabolic process	gi|356520867|ref|XP_003529081.1|/7.9853e-178/PREDICTED: 1-aminocyclopropane-1-carboxylate oxidase 1-like [Glycine max]
Glyma06g01760	1605	41	95	3.03601	6.87208	1.17857	Up	5.66e-06	8.45e-05	-	GO:0009528//plastid inner membrane	-	GO:0009658//chloroplast organization	gi|363807146|ref|NP_001242343.1|/1.44013e-179/uncharacterized protein LOC100812404 [Glycine max]
Glyma03g28731	1258	60	139	5.66846	12.8284	1.17832	Up	3.85e-08	8.66e-07	-	-	-	-	gi|356504744|ref|XP_003521155.1|/2.28058e-49/PREDICTED: uncharacterized protein LOC100793368 [Glycine max]
Glyma13g18400	844	38	88	5.35101	12.1054	1.17777	Up	1.28e-05	0.000175972	K09286|1|7e-18|89.4|ath:AT4G17490|EREBP-like factor	-	-	-	gi|351721044|ref|NP_001238476.1|/7.07312e-69/uncharacterized protein LOC100500462 [Glycine max]
Glyma08g18891	1005	251	581	29.6826	67.1197	1.17712	Up	2.1e-29	2.41e-27	-	-	-	-	-
Glyma14g07990	1009	266	615	31.3318	70.7658	1.17543	Up	5.81e-31	7.11e-29	-	-	-	-	gi|351722404|ref|NP_001236475.1|/7.37141e-74/uncharacterized protein LOC100527212 [Glycine max]
Glyma17g23740	1109	186	430	19.9331	45.017	1.1753	Up	4e-22	3.11e-20	-	-	GO:0005488//binding	GO:0010087//phloem or xylem histogenesis	gi|358248440|ref|NP_001239882.1|/3.28675e-126/uncharacterized protein LOC100815663 [Glycine max]
Glyma04g00460	1343	90	208	7.96454	17.9815	1.17485	Up	1.86e-11	6.33e-10	K09841|1|3e-55|214|bdi:100827045|xanthoxin dehydrogenase [EC:1.1.1.288];K13070|2|2e-53|207|osa:4335093|momilactone-A synthase [EC:1.1.1.295]	-	GO:0016491//oxidoreductase activity	GO:0008152//metabolic process	gi|356509515|ref|XP_003523493.1|/4.40792e-139/PREDICTED: momilactone A synthase-like [Glycine max]
Glyma02g37280	960	190	438	23.5221	52.9715	1.1712	Up	2.17e-22	1.7e-20	-	-	-	-	gi|356500728|ref|XP_003519183.1|/8.53485e-101/PREDICTED: uncharacterized protein LOC100802714 [Glycine max]
Glyma02g01330	1472	60	138	4.84438	10.8846	1.1679	Up	5.36e-08	1.18e-06	K04125|1|5e-92|336|pop:POPTR_550316|gibberellin 2-oxidase [EC:1.14.11.13]	-	GO:0046914//transition metal ion binding;GO:0016706//oxidoreductase activity, acting on paired donors, with incorporation or reduction of molecular oxygen, 2-oxoglutarate as one donor, and incorporation of one atom each of oxygen into both donors;GO:0016701//oxidoreductase activity, acting on single donors with incorporation of molecular oxygen	GO:0008152//metabolic process	gi|356499745|ref|XP_003518697.1|/0/PREDICTED: gibberellin 2-beta-dioxygenase 2-like [Glycine max]
Glyma08g20820	1420	150	345	12.5544	28.2079	1.1679	Up	6.88e-18	4.1e-16	K13248|1|2e-153|540|gmx:100785878|pyridoxal phosphate phosphatase PHOSPHO2 [EC:3.1.3.74]	-	GO:0016791//phosphatase activity	GO:0006796//phosphate-containing compound metabolic process	gi|356526041|ref|XP_003531628.1|/9.17438e-159/PREDICTED: inorganic pyrophosphatase 2-like [Glycine max]
Glyma16g34720	1372	60	138	5.19746	11.6779	1.1679	Up	5.36e-08	1.18e-06	K02866|1|6e-39|160|osa:4332737|large subunit ribosomal protein L10e	-	GO:0016791//phosphatase activity	-	gi|351726720|ref|NP_001237136.1|/1.52394e-110/syringolide-induced protein B15-3-5 [Glycine max]
Glyma13g26560	981	97	223	11.7516	26.3922	1.16725	Up	4.53e-12	1.66e-10	K14431|1|2e-86|317|aly:ARALYDRAFT_311885|transcription factor TGA	-	GO:0003677//DNA binding	GO:0006351//transcription, DNA-dependent	gi|356548861|ref|XP_003542817.1|/1.22008e-158/PREDICTED: U-box domain-containing protein 11-like [Glycine max]
Glyma07g36640	1836	47	108	3.04242	6.82953	1.16657	Up	1.56e-06	2.62e-05	K13424|1|2e-25|115|sbi:SORBI_09g023270|WRKY transcription factor 33	-	-	-	gi|356519913|ref|XP_003528613.1|/7.24665e-142/PREDICTED: probable WRKY transcription factor 48-like [Glycine max]
Glyma01g43420	2246	64	147	3.38661	7.59884	1.16594	Up	2.06e-08	4.75e-07	K13426|1|5e-13|75.1|vvi:100251862|WRKY transcription factor 29;K13425|2|6e-13|74.7|ath:AT4G01250|WRKY transcription factor 22	-	-	-	gi|356497305|ref|XP_003517501.1|/9.71766e-180/PREDICTED: probable WRKY transcription factor 53 [Glycine max]
Glyma10g40320	1011	137	314	16.1051	36.0594	1.16286	Up	2.59e-16	1.38e-14	-	-	-	-	gi|356574315|ref|XP_003555294.1|/3.86648e-30/PREDICTED: LOW QUALITY PROTEIN: probable beta-D-xylosidase 5-like [Glycine max]
Glyma19g35300	1008	48	110	5.65946	12.6699	1.16266	Up	1.33e-06	2.27e-05	K00128|1|4e-16|84.0|gmx:100786773|aldehyde dehydrogenase (NAD+) [EC:1.2.1.3];K07870|3|1e-10|65.9|rcu:RCOM_0558500|Ras homolog gene family, member T1	-	-	-	gi|356573418|ref|XP_003554858.1|/1.61679e-28/PREDICTED: uncharacterized protein LOC100804512 [Glycine max]
Glyma15g01690	1285	55	126	5.08691	11.3843	1.16219	Up	2.28e-07	4.52e-06	K05236|1|1e-46|185|aly:ARALYDRAFT_475134|coatomer protein complex, subunit alpha (xenin)	GO:0030120//vesicle coat;GO:0030120//vesicle coat	GO:0004683//calmodulin-dependent protein kinase activity;GO:0004683//calmodulin-dependent protein kinase activity	GO:0015031//protein transport;GO:0015031//protein transport	gi|356556044|ref|XP_003546337.1|/1.65251e-180/PREDICTED: coatomer subunit beta'-2-like [Glycine max]
Glyma19g28550	1462	69	158	5.60914	12.5473	1.16152	Up	6.76e-09	1.67e-07	K10610|1|1e-22|105|ota:Ot10g03450|DNA damage-binding protein 1;K03671|2|4e-07|54.7|pop:POPTR_219472|thioredoxin 1	GO:0009941//chloroplast envelope;GO:0009532//plastid stroma	GO:0016667//oxidoreductase activity, acting on a sulfur group of donors	-	gi|356571680|ref|XP_003554002.1|/1.98527e-156/PREDICTED: thioredoxin-like 1-1, chloroplastic-like [Glycine max]
Glyma15g08360	1647	69	158	4.97909	11.1379	1.16152	Up	6.76e-09	1.68e-07	K09286|1|5e-25|114|vvi:100264172|EREBP-like factor;K03021|2|6e-25|114|smo:SELMODRAFT_443461|DNA-directed RNA polymerase III subunit RPC2 [EC:2.7.7.6]	-	-	-	gi|356555350|ref|XP_003545996.1|/2.5314e-86/PREDICTED: ethylene-responsive transcription factor 12-like [Glycine max]
Glyma05g26660	1912	45	103	2.79717	6.25445	1.16091	Up	2.99e-06	4.72e-05	K01580|1|0.0|955|gmx:100812201|glutamate decarboxylase [EC:4.1.1.15]	-	GO:0016831//carboxy-lyase activity;GO:0048037//cofactor binding	GO:0009064//glutamine family amino acid metabolic process	gi|359807606|ref|NP_001241161.1|/0/uncharacterized protein LOC100812201 [Glycine max]
Glyma04g35380	921	49	112	6.32311	14.1188	1.15891	Up	1.14e-06	1.96e-05	-	GO:0043231//intracellular membrane-bounded organelle	-	-	gi|356508667|ref|XP_003523076.1|/2.76317e-101/PREDICTED: uncharacterized protein LOC100790403 [Glycine max]
Glyma11g27820	1652	42	96	3.02158	6.74685	1.15891	Up	6.73e-06	9.89e-05	K11228|1|3e-40|164|ota:Ot13g01170|mitogen-activated protein kinase kinase kinase [EC:2.7.11.1];K13414|2|4e-34|144|sbi:SORBI_01g040360|mitogen-activated protein kinase kinase kinase 1, plant [EC:2.7.11.25]	-	GO:0016301//kinase activity	-	gi|356541770|ref|XP_003539346.1|/0/PREDICTED: protein kinase byr2-like [Glycine max]
Glyma13g30770	925	173	395	22.2279	49.5787	1.15735	Up	5.43e-20	3.68e-18	K03676|1|4e-11|67.0|smo:SELMODRAFT_89111|glutaredoxin 3	-	GO:0005488//binding;GO:0015036//disulfide oxidoreductase activity	GO:0007165//signal transduction;GO:0010033//response to organic substance;GO:0019725//cellular homeostasis	gi|356549274|ref|XP_003543019.1|/1.64401e-69/PREDICTED: glutaredoxin-C9-like [Glycine max]
Glyma02g08835	2510	538	1228	25.4743	56.8021	1.1569	Up	1.14e-58	3.24e-56	K09286|1|2e-21|103|ath:AT1G43160|EREBP-like factor	-	-	-	gi|356502348|ref|XP_003519981.1|/4.30014e-115/PREDICTED: uncharacterized protein LOC100804843 [Glycine max]
Glyma07g00790	2237	39	89	2.07202	4.61917	1.1566	Up	1.52e-05	0.000205791	K03453|1|5e-12|71.6|vcn:VOLCADRAFT_102664|bile acid:Na+ symporter, BASS family	-	-	-	gi|356528936|ref|XP_003533053.1|/6.5621e-136/PREDICTED: uncharacterized protein LOC100792068 [Glycine max]
Glyma05g34670	1062	39	89	4.3645	9.72983	1.1566	Up	1.52e-05	0.000205727	-	-	GO:0016462//pyrophosphatase activity;GO:0016462//pyrophosphatase activity	-	gi|356513062|ref|XP_003525233.1|/1.58789e-98/PREDICTED: nudix hydrolase 17, mitochondrial-like [Glycine max]
Glyma10g09750	1276	619	1408	57.6547	128.113	1.1519	Up	1.47e-66	5.84e-64	K08488|1|3e-09|61.6|ath:AT1G32270|syntaxin 7	-	-	-	gi|356534534|ref|XP_003535808.1|/1.29897e-92/PREDICTED: uncharacterized protein LOC100788062 [Glycine max]
Glyma07g06480	1279	547	1244	50.829	112.925	1.15164	Up	5.4e-59	1.59e-56	K00640|1|3e-131|466|gmx:547632|serine O-acetyltransferase [EC:2.3.1.30]	GO:0044424//intracellular part	GO:0016412//serine O-acyltransferase activity	GO:0006563//L-serine metabolic process	gi|356520308|ref|XP_003528805.1|/2.57054e-141/PREDICTED: LOW QUALITY PROTEIN: serine acetyltransferase 5-like [Glycine max]
Glyma12g09240	2077	340	772	19.4552	43.1539	1.14933	Up	3.77e-37	5.98e-35	K13407|1|4e-117|420|vvi:100259592|cytochrome P450, family 94, subfamily A, polypeptide 1 (fatty acid omega-hydroxylase) [EC:1.14.-.-];K00517|4|2e-100|365|ath:AT3G56630|[EC:1.14.-.-]	-	GO:0016712//oxidoreductase activity, acting on paired donors, with incorporation or reduction of molecular oxygen, reduced flavin or flavoprotein as one donor, and incorporation of one atom of oxygen;GO:0005506//iron ion binding	GO:0008152//metabolic process	gi|356544712|ref|XP_003540791.1|/0/PREDICTED: cytochrome P450 94A1-like [Glycine max]
Glyma18g05160	1280	547	1242	50.7892	112.655	1.14932	Up	1.02e-58	2.92e-56	-	-	-	-	gi|351722478|ref|NP_001238525.1|/9.05153e-70/uncharacterized protein LOC100306161 [Glycine max]
Glyma10g31240	1191	301	683	30.0365	66.5807	1.14839	Up	5.11e-33	6.79e-31	-	-	-	-	gi|356535236|ref|XP_003536154.1|/2.02229e-124/PREDICTED: F-box protein PP2-B10-like [Glycine max]
Glyma12g34970	1777	131	297	8.7615	19.4048	1.14716	Up	3.28e-15	1.61e-13	-	-	-	-	gi|224115026|ref|XP_002316920.1|/4.20321e-26/predicted protein [Populus trichocarpa]
Glyma17g07580	2411	324	734	15.9714	35.3459	1.14605	Up	2.99e-35	4.35e-33	K11982|1|2e-07|56.2|aly:ARALYDRAFT_483145|E3 ubiquitin-protein ligase RNF115/126 [EC:6.3.2.19];K15692|3|4e-07|55.5|smo:SELMODRAFT_66937|E3 ubiquitin-protein ligase RNF13 [EC:6.3.2.19];K10601|4|4e-07|55.5|ath:AT3G16090|E3 ubiquitin-protein ligase synoviolin [EC:6.3.2.19];K06058|5|9e-07|54.3|smo:SELMODRAFT_119112|deltex	-	GO:0046872//metal ion binding;GO:0046872//metal ion binding	GO:0009743//response to carbohydrate stimulus;GO:0009743//response to carbohydrate stimulus	gi|357479885|ref|XP_003610228.1|/2.87365e-41/RING finger-like protein [Medicago truncatula]
Glyma09g05850	666	49	111	8.74412	19.3503	1.14597	Up	1.58e-06	2.64e-05	K09286|1|1e-11|67.8|pop:POPTR_588763|EREBP-like factor	-	-	-	gi|351725331|ref|NP_001235553.1|/6.0326e-37/uncharacterized protein LOC100500521 [Glycine max]
Glyma20g16920	1070	34	77	3.7765	8.355	1.14559	Up	6.6e-05	0.000757642	K09286|1|1e-31|135|vvi:100254616|EREBP-like factor	-	-	-	gi|351726443|ref|NP_001235847.1|/2.38747e-118/uncharacterized protein LOC100305726 [Glycine max]
Glyma05g37420	1386	259	586	22.2091	49.0879	1.14422	Up	2.1e-28	2.3e-26	-	-	-	-	gi|356513345|ref|XP_003525374.1|/9.84237e-49/PREDICTED: uncharacterized protein LOC100784242 [Glycine max]
Glyma11g09070	1874	134	303	8.49825	18.7721	1.14335	Up	2.06e-15	1.03e-13	K00924|1|5e-117|420|ath:AT4G35600|[EC:2.7.1.-];K05658|4|6e-104|376|vvi:100262734|ATP-binding cassette, subfamily B (MDR/TAP), member 1	-	GO:0004713//protein tyrosine kinase activity;GO:0032559;GO:0004713//protein tyrosine kinase activity;GO:0032559;GO:0004713//protein tyrosine kinase activity;GO:0032559	GO:0006464//cellular protein modification process;GO:0006464//cellular protein modification process;GO:0006464//cellular protein modification process	gi|356540874|ref|XP_003538909.1|/0/PREDICTED: probable serine/threonine-protein kinase Cx32, chloroplastic-like [Glycine max]
Glyma18g04620	1196	46	104	4.5711	10.0958	1.14314	Up	3.54e-06	5.52e-05	-	-	GO:0003824//catalytic activity	-	gi|356569788|ref|XP_003553078.1|/2.71351e-113/PREDICTED: nudix hydrolase 17, mitochondrial-like [Glycine max]
Glyma07g16810	1233	214	483	20.6274	45.4803	1.14068	Up	1.39e-23	1.17e-21	K00799|1|6e-120|429|gmx:100808141|glutathione S-transferase [EC:2.5.1.18]	-	GO:0016765//transferase activity, transferring alkyl or aryl (other than methyl) groups	GO:0050896//response to stimulus	gi|351727399|ref|NP_001238439.1|/1.00673e-126/probable glutathione S-transferase [Glycine max]
Glyma17g35360	1442	43	97	3.54403	7.80991	1.13991	Up	7.96e-06	0.000115601	-	-	GO:0004091//carboxylesterase activity;GO:0004091//carboxylesterase activity	-	gi|356564125|ref|XP_003550307.1|/1.76952e-149/PREDICTED: sigma factor sigB regulation protein rsbQ-like [Glycine max]
Glyma06g45410	715	192	432	31.9146	70.1483	1.13619	Up	3.92e-21	2.87e-19	-	-	-	-	gi|356517580|ref|XP_003527465.1|/1.30962e-43/PREDICTED: uncharacterized protein LOC100778355 [Glycine max]
Glyma07g14750	1710	36	81	2.50208	5.49957	1.13619	Up	4.76e-05	0.00056761	-	-	GO:0001071//nucleic acid binding transcription factor activity	GO:0009314//response to radiation;GO:0010467//gene expression	gi|356523088|ref|XP_003530174.1|/1.14248e-113/PREDICTED: GATA transcription factor 2-like [Glycine max]
Glyma03g00970	934	68	153	8.6528	19.0189	1.13619	Up	2.09e-08	4.83e-07	-	-	-	-	gi|356506202|ref|XP_003521876.1|/5.82769e-38/PREDICTED: uncharacterized protein LOC100776350 [Glycine max]
Glyma19g24640	1882	213	479	13.451	29.5499	1.13544	Up	3.06e-23	2.51e-21	-	GO:0031410//cytoplasmic vesicle;GO:0031410//cytoplasmic vesicle;GO:0031410//cytoplasmic vesicle	-	-	gi|363814328|ref|NP_001242294.1|/0/uncharacterized protein LOC100777575 [Glycine max]
Glyma12g35000	1679	73	164	5.16733	11.3405	1.13399	Up	6.86e-09	1.7e-07	-	-	GO:0003676//nucleic acid binding;GO:0003676//nucleic acid binding	-	gi|351726966|ref|NP_001238424.1|/0/NAC domain protein NAC4 [Glycine max]
Glyma18g09920	3772	74	166	2.3316	5.10947	1.13185	Up	5.86e-09	1.46e-07	K13457|1|4e-128|457|vvi:100252764|disease resistance protein RPM1	-	GO:0032559	GO:0012501//programmed cell death;GO:0006950//response to stress	gi|356566971|ref|XP_003551698.1|/0/PREDICTED: disease resistance protein RPM1-like [Glycine max]
Glyma04g08020	852	54	121	7.53266	16.4887	1.13024	Up	7.09e-07	1.28e-05	-	-	-	-	gi|356507827|ref|XP_003522665.1|/2.57128e-34/PREDICTED: uncharacterized protein LOC100787739 [Glycine max]
Glyma12g09830	1992	262	587	15.6317	34.2128	1.13006	Up	6.41e-28	6.88e-26	K12581|1|5e-77|287|ppp:PHYPADRAFT_185698|CCR4-NOT transcription complex subunit 7/8	GO:0043231//intracellular membrane-bounded organelle;GO:0043231//intracellular membrane-bounded organelle	GO:0000175//3'-5'-exoribonuclease activity;GO:0005488//binding;GO:0000175//3'-5'-exoribonuclease activity;GO:0005488//binding	GO:0006950//response to stress;GO:0016070//RNA metabolic process;GO:0006950//response to stress;GO:0016070//RNA metabolic process	gi|356542778|ref|XP_003539842.1|/2.08892e-162/PREDICTED: probable CCR4-associated factor 1 homolog 9-like [Glycine max]
Glyma10g00470	1065	636	1417	70.9744	154.476	1.12201	Up	2.79e-64	9.6e-62	K13448|1|1e-71|268|vvi:100244152|calcium-binding protein CML	-	GO:0046872//metal ion binding;GO:0016628//oxidoreductase activity, acting on the CH-CH group of donors, NAD or NADP as acceptor	GO:0008152//metabolic process	gi|351727589|ref|NP_001236910.1|/2.84072e-79/uncharacterized protein LOC100526987 [Glycine max]
Glyma12g28510	2077	44	98	2.51774	5.47809	1.12155	Up	9.37e-06	0.000133106	K14638|1|2e-94|345|ppp:PHYPADRAFT_189464|solute carrier family 15 (peptide/histidine transporter), member 3/4	GO:0031224//intrinsic to membrane	-	GO:0015833//peptide transport	gi|356543362|ref|XP_003540130.1|/0/PREDICTED: probable peptide/nitrate transporter At1g59740-like [Glycine max]
Glyma14g03890	988	75	167	9.02191	19.6245	1.12115	Up	6.87e-09	1.7e-07	-	-	-	-	gi|356554139|ref|XP_003545406.1|/5.40706e-122/PREDICTED: uncharacterized protein LOC100808831 [Glycine max]
Glyma13g33300	1450	682	1516	55.8999	121.387	1.11869	Up	2.51e-68	1.05e-65	K04125|1|9e-145|511|pop:POPTR_550316|gibberellin 2-oxidase [EC:1.14.11.13]	-	GO:0046914//transition metal ion binding;GO:0016706//oxidoreductase activity, acting on paired donors, with incorporation or reduction of molecular oxygen, 2-oxoglutarate as one donor, and incorporation of one atom each of oxygen into both donors;GO:0016701//oxidoreductase activity, acting on single donors with incorporation of molecular oxygen	GO:0008152//metabolic process	gi|356549549|ref|XP_003543155.1|/0/PREDICTED: gibberellin 2-beta-dioxygenase 1-like [Glycine max]
Glyma04g05390	1329	54	120	4.82907	10.4833	1.11827	Up	9.77e-07	1.71e-05	-	-	GO:0005488//binding;GO:0005488//binding	-	gi|356509817|ref|XP_003523642.1|/7.05678e-73/PREDICTED: uncharacterized protein LOC100795143 [Glycine max]
Glyma11g37500	3672	36	80	1.16518	2.52946	1.11827	Up	6.6e-05	0.000757677	K04733|1|1e-65|250|aly:ARALYDRAFT_916421|interleukin-1 receptor-associated kinase 4 [EC:2.7.11.1];K13415|4|1e-64|246|rcu:RCOM_0478150|protein brassinosteroid insensitive 1 [EC:2.7.10.1 2.7.11.1];K13430|5|6e-64|244|osa:4329463|serine/threonine-protein kinase PBS1 [EC:2.7.11.1]	-	GO:0004672//protein kinase activity;GO:0032559;GO:0004672//protein kinase activity;GO:0032559;GO:0004672//protein kinase activity;GO:0032559	GO:0006464//cellular protein modification process;GO:0006464//cellular protein modification process;GO:0006464//cellular protein modification process	gi|356538111|ref|XP_003537548.1|/0/PREDICTED: probable LRR receptor-like serine/threonine-protein kinase At1g67720-like [Glycine max]
Glyma19g04210	1928	36	80	2.21917	4.81751	1.11827	Up	6.6e-05	0.000757878	-	-	-	-	gi|356573565|ref|XP_003554928.1|/0/PREDICTED: protein COBRA-like [Glycine max]
Glyma16g06950	2173	50	111	2.73467	5.93066	1.11683	Up	2.57e-06	4.11e-05	K08286|1|1e-81|303|aly:ARALYDRAFT_491919|protein-serine/threonine kinase [EC:2.7.11.-]	-	-	-	gi|356560534|ref|XP_003548546.1|/0/PREDICTED: probable LRR receptor-like serine/threonine-protein kinase At4g08850-like [Glycine max]
Glyma08g01601	602	96	213	18.9526	41.0793	1.11601	Up	6.89e-11	2.18e-09	-	-	-	-	gi|357520509|ref|XP_003630543.1|/3.39519e-06/hypothetical protein MTR_8g098620 [Medicago truncatula]
Glyma13g21540	1550	217	481	16.6388	36.0291	1.11461	Up	1.08e-22	8.63e-21	K01623|1|0.0|712|gmx:100815070|fructose-bisphosphate aldolase, class I [EC:4.1.2.13]	GO:0030312//external encapsulating structure;GO:0031967;GO:0031981//nuclear lumen;GO:0009536//plastid;GO:0031090//organelle membrane;GO:0005576//extracellular region	GO:0016832//aldehyde-lyase activity;GO:0046914//transition metal ion binding	GO:0006007//glucose catabolic process;GO:0010038//response to metal ion;GO:0006970//response to osmotic stress	gi|356548343|ref|XP_003542562.1|/0/PREDICTED: fructose-bisphosphate aldolase, cytoplasmic isozyme-like [Glycine max]
Glyma08g28220	934	65	144	8.27105	17.9001	1.11382	Up	8.82e-08	1.87e-06	K04371|1|2e-15|81.6|vvi:100254083|extracellular signal-regulated kinase 1/2 [EC:2.7.11.24];K09060|2|1e-09|62.0|rcu:RCOM_0553250|plant G-box-binding factor	GO:0043231//intracellular membrane-bounded organelle	GO:0003677//DNA binding;GO:0001071//nucleic acid binding transcription factor activity;GO:0005515//protein binding	GO:0006351//transcription, DNA-dependent	gi|351722803|ref|NP_001235209.1|/2.24791e-82/uncharacterized protein LOC100500497 [Glycine max]
Glyma06g15490	1243	47	104	4.49388	9.71409	1.11212	Up	5.75e-06	8.57e-05	-	GO:0016020//membrane	-	-	gi|356516331|ref|XP_003526849.1|/1.52731e-106/PREDICTED: uncharacterized protein LOC100805095 [Glycine max]
Glyma08g17880	1450	87	192	7.13092	15.3735	1.10829	Up	7.4e-10	2.06e-08	K14488|1|4e-73|273|gmx:100806044|SAUR family protein	-	-	GO:0009725//response to hormone stimulus	gi|356528687|ref|XP_003532931.1|/5.13545e-72/PREDICTED: auxin-induced protein X15-like [Glycine max]
Glyma06g20730	1616	257	567	18.9011	40.7363	1.10785	Up	3.18e-26	3.14e-24	K00799|1|5e-54|210|mtr:MTR_5g040430|glutathione S-transferase [EC:2.5.1.18]	-	GO:0016765//transferase activity, transferring alkyl or aryl (other than methyl) groups;GO:0016829//lyase activity	-	gi|351727779|ref|NP_001238708.1|/6.61993e-132/glutathione S-transferase GST 12 [Glycine max]
Glyma18g02400	769	112	247	17.3096	37.2915	1.10728	Up	2.91e-12	1.09e-10	-	-	-	-	gi|356567838|ref|XP_003552122.1|/2.29816e-28/PREDICTED: uncharacterized protein LOC100792830 [Glycine max]
Glyma03g35850	471	39	86	9.84097	21.1991	1.10713	Up	4.03e-05	0.00048909	-	-	-	-	gi|356503839|ref|XP_003520710.1|/4.0014e-86/PREDICTED: uncharacterized protein LOC100804851 [Glycine max]
Glyma01g02110	1340	297	652	26.3418	56.4914	1.10068	Up	1.28e-29	1.48e-27	-	GO:0043231//intracellular membrane-bounded organelle	-	-	gi|356496362|ref|XP_003517037.1|/9.99682e-121/PREDICTED: uncharacterized protein LOC100788211 [Glycine max]
Glyma04g35580	1466	57	125	4.62099	9.89956	1.09916	Up	8.27e-07	1.47e-05	-	-	-	-	gi|356507240|ref|XP_003522377.1|/6.06698e-121/PREDICTED: uncharacterized protein LOC100789513 [Glycine max]
Glyma16g07081	711	43	94	7.18775	15.3496	1.09459	Up	2.09e-05	0.000274589	-	GO:0009532//plastid stroma	GO:0016462//pyrophosphatase activity;GO:0032559	-	gi|91214183|ref|YP_538807.1|/3.01261e-133/Ycf2 [Glycine max]
Glyma12g30920	1173	1380	3015	139.822	298.421	1.09376	Up	2.63e-129	3.35e-126	-	-	-	-	gi|356543586|ref|XP_003540241.1|/1.15829e-68/PREDICTED: zinc finger A20 and AN1 domain-containing stress-associated protein 3-like isoform 1 [Glycine max]
Glyma12g12600	1283	89	194	8.24438	17.5556	1.09045	Up	1e-09	2.75e-08	K10666|1|5e-27|120|aly:ARALYDRAFT_889362|E3 ubiquitin-protein ligase RNF5 [EC:6.3.2.19]	GO:0031090//organelle membrane	GO:0019787//small conjugating protein ligase activity	GO:0006511//ubiquitin-dependent protein catabolic process;GO:0009725//response to hormone stimulus;GO:0032446//protein modification by small protein conjugation;GO:0006950//response to stress	gi|255638201|gb|ACU19414.1|/6.38889e-132/unknown [Glycine max]
Glyma11g08190	1120	345	752	36.6096	77.9542	1.0904	Up	2.01e-33	2.74e-31	K03686|1|3e-11|67.8|smo:SELMODRAFT_167519|molecular chaperone DnaJ	-	GO:0005515//protein binding	GO:0044267//cellular protein metabolic process	gi|359806673|ref|NP_001241283.1|/5.22641e-79/uncharacterized protein LOC100800959 [Glycine max]
Glyma11g13140	1010	146	318	17.1801	36.5549	1.08933	Up	5.22e-15	2.52e-13	-	-	-	-	-
Glyma08g10220	777	79	172	12.0837	25.7008	1.08875	Up	9.31e-09	2.26e-07	K13464|1|5e-07|53.1|pop:POPTR_548076|jasmonate ZIM domain-containing protein	-	-	-	gi|351727797|ref|NP_001237173.1|/6.32587e-66/uncharacterized protein LOC100305565 [Glycine max]
Glyma10g06710	1193	85	185	8.46784	18.0041	1.08826	Up	2.6e-09	6.79e-08	K01674|1|2e-164|576|gmx:100797935|carbonic anhydrase [EC:4.2.1.1]	-	GO:0046914//transition metal ion binding;GO:0016836//hydro-lyase activity	GO:0044237//cellular metabolic process	gi|356533269|ref|XP_003535188.1|/2.84852e-163/PREDICTED: bifunctional monodehydroascorbate reductase and carbonic anhydrase nectarin-3-like [Glycine max]
Glyma09g31381	1752	102	222	6.91927	14.7116	1.08826	Up	6.76e-11	2.14e-09	K13416|1|8e-47|186|rcu:RCOM_1534760|brassinosteroid insensitive 1-associated receptor kinase 1 [EC:2.7.10.1 2.7.11.1];K13418|3|3e-46|184|vvi:100247683|somatic embryogenesis receptor kinase 1 [EC:2.7.10.1 2.7.11.1];K04733|4|4e-46|184|smo:SELMODRAFT_159261|interleukin-1 receptor-associated kinase 4 [EC:2.7.11.1]	-	-	-	gi|356529560|ref|XP_003533358.1|/0/PREDICTED: probable receptor-like protein kinase At1g67000-like [Glycine max]
Glyma20g24700	2400	131	285	6.48716	13.7871	1.08766	Up	1.42e-13	6e-12	-	-	-	GO:0006810//transport	gi|356575514|ref|XP_003555885.1|/0/PREDICTED: uncharacterized protein LOC100808975 [Glycine max]
Glyma12g13290	1305	1155	2506	105.188	222.951	1.08376	Up	3.08e-106	2.42e-103	K01090|1|1e-37|155|sbi:SORBI_01g038410|protein phosphatase [EC:3.1.3.16];K14497|3|4e-30|130|pop:POPTR_422871|protein phosphatase 2C [EC:3.1.3.16]	-	GO:0004721//phosphoprotein phosphatase activity	-	gi|356542975|ref|XP_003539939.1|/6.93731e-158/PREDICTED: probable protein phosphatase 2C 58-like [Glycine max]
Glyma08g05010	944	101	219	12.7158	26.9347	1.08284	Up	1.08e-10	3.34e-09	-	-	-	-	gi|356524483|ref|XP_003530858.1|/6.35565e-24/PREDICTED: uncharacterized protein LOC100820614 [Glycine max]
Glyma05g03920	1126	48	104	5.06637	10.7235	1.08174	Up	9.22e-06	0.000131317	-	-	-	-	gi|356514146|ref|XP_003525767.1|/8.31469e-117/PREDICTED: uncharacterized protein LOC100788494 [Glycine max]
Glyma03g36010	1354	482	1044	42.308	89.5203	1.08128	Up	3.77e-45	7.63e-43	-	-	-	-	gi|356503848|ref|XP_003520714.1|/5.17811e-87/PREDICTED: uncharacterized protein LOC100807520 [Glycine max]
Glyma10g29210	863	853	1844	117.472	248.079	1.07849	Up	4.6e-78	2.34e-75	-	GO:0016020//membrane;GO:0031224//intrinsic to membrane	-	-	gi|363807758|ref|NP_001242430.1|/4.21751e-24/uncharacterized protein LOC100797577 [Glycine max]
Glyma14g11160	1378	69	149	5.95106	12.5538	1.07691	Up	1.18e-07	2.46e-06	-	-	-	-	gi|351724497|ref|NP_001235268.1|/1.54391e-86/uncharacterized protein LOC100499733 [Glycine max]
Glyma18g07800	499	44	95	10.4796	22.1036	1.07669	Up	2.43e-05	0.000312932	-	-	-	-	gi|357460427|ref|XP_003600495.1|/1.03915e-16/hypothetical protein MTR_3g061880 [Medicago truncatula]
Glyma06g07720	931	44	95	5.61691	11.8471	1.07669	Up	2.43e-05	0.000313025	-	-	-	-	gi|356515498|ref|XP_003526437.1|/4.71991e-56/PREDICTED: uncharacterized protein LOC100809355 [Glycine max]
Glyma15g04430	1741	57	123	3.89108	8.2025	1.07589	Up	1.55e-06	2.6e-05	-	-	-	-	gi|356558147|ref|XP_003547369.1|/4.864e-144/PREDICTED: dof zinc finger protein DOF3.6-like [Glycine max]
Glyma04g09710	2294	380	819	19.6872	41.4505	1.07413	Up	2.03e-35	2.99e-33	-	-	-	-	gi|356507995|ref|XP_003522748.1|/1.23876e-121/PREDICTED: putative DNA-binding protein ESCAROLA-like [Glycine max]
Glyma18g47660	2804	52	112	2.20404	4.63746	1.07318	Up	4.79e-06	7.26e-05	K08852|1|1e-17|89.7|vcn:VOLCADRAFT_107956|serine/threonine-protein kinase/endoribonuclease IRE1 [EC:2.7.11.1 3.1.26.-]	GO:0043231//intracellular membrane-bounded organelle;GO:0043231//intracellular membrane-bounded organelle;GO:0043231//intracellular membrane-bounded organelle;GO:0043231//intracellular membrane-bounded organelle;GO:0043231//intracellular membrane-bounded organelle	GO:0046914//transition metal ion binding;GO:0003676//nucleic acid binding;GO:0046914//transition metal ion binding;GO:0003676//nucleic acid binding;GO:0046914//transition metal ion binding;GO:0003676//nucleic acid binding;GO:0046914//transition metal ion binding;GO:0003676//nucleic acid binding;GO:0046914//transition metal ion binding;GO:0003676//nucleic acid binding	-	gi|356531908|ref|XP_003534518.1|/0/PREDICTED: zinc finger CCCH domain-containing protein ZFN-like isoform 2 [Glycine max]
Glyma12g34420	2550	245	527	11.4188	23.9944	1.07129	Up	2.83e-23	2.33e-21	K14494|1|3e-60|231|ppp:PHYPADRAFT_235432|DELLA protein	-	-	-	gi|356543966|ref|XP_003540429.1|/0/PREDICTED: chitin-inducible gibberellin-responsive protein 1-like [Glycine max]
Glyma06g17830	1530	40	86	3.10716	6.52599	1.0706	Up	6.46e-05	0.00074304	-	-	-	-	gi|356518886|ref|XP_003528108.1|/0/PREDICTED: uncharacterized protein LOC100799252 [Glycine max]
Glyma06g04840	2253	342	735	18.0409	37.8762	1.07001	Up	9.08e-32	1.15e-29	-	-	-	-	gi|383793870|gb|AFH53181.1|/1.63329e-126/C2H2 zinc-finger protein, partial [Glycine max]
Glyma14g27015	2460	128	275	6.184	12.9789	1.06955	Up	7.81e-13	3.08e-11	K13430|1|2e-46|186|zma:100283091|serine/threonine-protein kinase PBS1 [EC:2.7.11.1];K04733|3|3e-46|185|smo:SELMODRAFT_159261|interleukin-1 receptor-associated kinase 4 [EC:2.7.11.1];K13416|4|2e-45|182|ath:AT4G33430|brassinosteroid insensitive 1-associated receptor kinase 1 [EC:2.7.10.1 2.7.11.1]	-	GO:0004871//signal transducer activity;GO:0004672//protein kinase activity;GO:0000166//nucleotide binding	-	gi|356551391|ref|XP_003544059.1|/0/PREDICTED: probable receptor-like protein kinase At1g67000-like [Glycine max]
Glyma16g04210	738	95	204	15.299	32.0932	1.06884	Up	7.1e-10	1.99e-08	-	-	-	-	gi|356560841|ref|XP_003548695.1|/4.04775e-35/PREDICTED: uncharacterized protein LOC100794528 [Glycine max]
Glyma12g15620	1982	55	118	3.29802	6.91223	1.06755	Up	2.93e-06	4.63e-05	K01188|1|0.0|668|sbi:SORBI_06g019840|beta-glucosidase [EC:3.2.1.21]	-	-	-	gi|356543110|ref|XP_003540006.1|/0/PREDICTED: beta-glucosidase 24-like [Glycine max]
Glyma05g17900	1368	262	561	22.762	47.612	1.0647	Up	1.91e-24	1.71e-22	K10577|1|2e-95|347|gmx:100500268|ubiquitin-conjugating enzyme E2 I [EC:6.3.2.19]	-	GO:0016879//ligase activity, forming carbon-nitrogen bonds;GO:0032559	GO:0006464//cellular protein modification process	gi|351726411|ref|NP_001235590.1|/2.59567e-94/uncharacterized protein LOC100500268 [Glycine max]
Glyma18g32860	5471	355	760	7.7118	16.1282	1.06445	Up	1.57e-32	2.07e-30	K05666|1|0.0|650|olu:OSTLU_35503|ATP-binding cassette, subfamily C (CFTR/MRP), member 2;K05658|2|1e-54|214|aly:ARALYDRAFT_494323|ATP-binding cassette, subfamily B (MDR/TAP), member 1	GO:0031224//intrinsic to membrane	GO:0017111//nucleoside-triphosphatase activity;GO:0015405;GO:0032559	GO:0006810//transport;GO:0009207	gi|356566246|ref|XP_003551345.1|/0/PREDICTED: ABC transporter C family member 3-like [Glycine max]
Glyma11g29440	750	43	92	6.81399	14.2418	1.06356	Up	3.93e-05	0.000478052	-	-	-	-	-
Glyma06g20530	1063	324	692	36.2248	75.581	1.06105	Up	1.28e-29	1.48e-27	-	GO:0044464//cell part	-	-	gi|356516776|ref|XP_003527069.1|/2.16557e-79/PREDICTED: pectinesterase 3-like [Glycine max]
Glyma11g03240	1100	59	126	6.37461	13.299	1.0609	Up	1.52e-06	2.56e-05	-	-	-	-	gi|356540275|ref|XP_003538615.1|/3.85241e-111/PREDICTED: uncharacterized protein LOC100787211 [Glycine max]
Glyma13g21401	2227	55	117	2.93519	6.09966	1.05527	Up	3.99e-06	6.14e-05	K02527|1|3e-60|218|gmx:100809456|3-deoxy-D-manno-octulosonic-acid transferase [EC:2.4.99.12 2.4.99.13 2.4.99.14 2.4.99.15]	GO:0043231//intracellular membrane-bounded organelle	GO:0030246//carbohydrate binding;GO:0016740//transferase activity	GO:0044238//primary metabolic process	gi|356548371|ref|XP_003542576.1|/8.16056e-78/PREDICTED: 3-deoxy-D-manno-octulosonic-acid transferase-like [Glycine max]
Glyma17g37800	1621	118	251	8.65154	17.9775	1.05517	Up	1.3e-11	4.51e-10	-	GO:0044464//cell part	-	GO:0009607//response to biotic stimulus	gi|356562409|ref|XP_003549464.1|/1.9753e-176/PREDICTED: thaumatin-like protein 1-like [Glycine max]
Glyma15g18860	2422	48	102	2.35538	4.88951	1.05373	Up	1.72e-05	0.000229858	K04368|1|1e-113|409|rcu:RCOM_1046440|mitogen-activated protein kinase kinase 1 [EC:2.7.12.2]	-	GO:0004672//protein kinase activity;GO:0032559;GO:0004672//protein kinase activity;GO:0032559;GO:0004672//protein kinase activity;GO:0032559	GO:0006464//cellular protein modification process;GO:0006464//cellular protein modification process;GO:0006464//cellular protein modification process	gi|356556312|ref|XP_003546470.1|/0/PREDICTED: mitogen-activated protein kinase kinase 2-like [Glycine max]
Glyma13g04670	2067	686	1457	39.4437	81.8387	1.05299	Up	9.3e-60	2.86e-57	K00517|1|2e-133|474|ath:AT4G31940|[EC:1.14.-.-];K05280|2|9e-88|323|pop:POPTR_823742|flavonoid 3'-monooxygenase [EC:1.14.13.21]	GO:0044464//cell part	GO:0016491//oxidoreductase activity;GO:0005506//iron ion binding	GO:0008152//metabolic process	gi|359806338|ref|NP_001240972.1|/0/cytochrome P450 82A3 [Glycine max]
Glyma12g32725	1142	323	686	33.6148	69.7425	1.05294	Up	4.95e-29	5.62e-27	-	-	-	-	gi|358249250|ref|NP_001239762.1|/6.63115e-45/uncharacterized protein LOC100814873 [Glycine max]
Glyma03g29090	2528	107	227	5.03038	10.4253	1.05135	Up	1.39e-10	4.26e-09	-	-	GO:0016740//transferase activity	-	gi|356504769|ref|XP_003521167.1|/0/PREDICTED: uncharacterized glycosyltransferase AGO61-like [Glycine max]
Glyma15g10070	1573	124	263	9.36887	19.4118	1.05099	Up	4.97e-12	1.81e-10	K04125|1|2e-140|497|pop:POPTR_758699|gibberellin 2-oxidase [EC:1.14.11.13]	-	GO:0046914//transition metal ion binding;GO:0016706//oxidoreductase activity, acting on paired donors, with incorporation or reduction of molecular oxygen, 2-oxoglutarate as one donor, and incorporation of one atom each of oxygen into both donors;GO:0016701//oxidoreductase activity, acting on single donors with incorporation of molecular oxygen	GO:0008152//metabolic process	gi|363807830|ref|NP_001242439.1|/0/uncharacterized protein LOC100806026 [Glycine max]
Glyma11g04460	3295	124	263	4.47261	9.26702	1.05099	Up	4.97e-12	1.81e-10	K01099|1|4e-47|188|ota:Ot04g02290|phosphatidylinositol-bisphosphatase [EC:3.1.3.36]	-	GO:0046030//inositol trisphosphate phosphatase activity;GO:0016491//oxidoreductase activity	GO:0046838//phosphorylated carbohydrate dephosphorylation;GO:0009725//response to hormone stimulus;GO:0043647//inositol phosphate metabolic process;GO:0032501//multicellular organismal process	gi|356540589|ref|XP_003538770.1|/0/PREDICTED: type I inositol-1,4,5-trisphosphate 5-phosphatase 2-like [Glycine max]
Glyma17g11500	1793	240	509	15.9084	32.9592	1.0509	Up	6.89e-22	5.26e-20	-	-	-	-	gi|356562914|ref|XP_003549713.1|/8.42193e-91/PREDICTED: uncharacterized protein LOC100786776 [Glycine max]
Glyma20g36460	834	228	483	32.491	67.2389	1.04926	Up	8.43e-21	6.01e-19	-	-	-	-	gi|356576664|ref|XP_003556450.1|/7.34504e-103/PREDICTED: putative DNA-binding protein ESCAROLA-like [Glycine max]
Glyma19g31080	889	76	161	10.1603	21.0263	1.04926	Up	7.02e-08	1.51e-06	-	-	-	-	gi|356571935|ref|XP_003554126.1|/2.45259e-67/PREDICTED: uncharacterized protein LOC100808231 [Glycine max]
Glyma14g36690	591	51	108	10.256	21.2166	1.04873	Up	1.05e-05	0.000147457	-	-	-	-	gi|356551821|ref|XP_003544272.1|/4.44146e-43/PREDICTED: uncharacterized protein LOC100804573 [Glycine max]
Glyma11g31330	1034	130	275	14.9423	30.8782	1.04719	Up	1.9e-12	7.23e-11	K00799|1|7e-73|272|gmx:547936|glutathione S-transferase [EC:2.5.1.18]	-	GO:0016740//transferase activity	-	gi|351725623|ref|NP_001236587.1|/8.38189e-121/uncharacterized protein LOC100527221 [Glycine max]
Glyma10g02830	2582	52	110	2.39354	4.94625	1.04719	Up	8.87e-06	0.000126851	K13416|1|1e-50|176|rcu:RCOM_1534760|brassinosteroid insensitive 1-associated receptor kinase 1 [EC:2.7.10.1 2.7.11.1];K04733|3|7e-50|185|smo:SELMODRAFT_159261|interleukin-1 receptor-associated kinase 4 [EC:2.7.11.1]	-	GO:0004672//protein kinase activity;GO:0032559;GO:0004672//protein kinase activity;GO:0032559	GO:0006464//cellular protein modification process;GO:0006464//cellular protein modification process	gi|356535678|ref|XP_003536371.1|/0/PREDICTED: receptor-like cytosolic serine/threonine-protein kinase RBK2-like [Glycine max]
Glyma01g44230	887	44	93	5.89554	12.173	1.04599	Up	4.53e-05	0.000543108	K09286|1|4e-19|93.6|pop:POPTR_655111|EREBP-like factor	GO:0043231//intracellular membrane-bounded organelle	GO:0001071//nucleic acid binding transcription factor activity	GO:0006351//transcription, DNA-dependent;GO:0009743//response to carbohydrate stimulus	gi|356495770|ref|XP_003516746.1|/9.23376e-99/PREDICTED: ethylene-responsive transcription factor ERF020-like [Glycine max]
Glyma16g02300	2020	53	112	3.11831	6.43734	1.0457	Up	7.52e-06	0.000109744	-	-	-	-	gi|356560253|ref|XP_003548408.1|/7.76415e-41/PREDICTED: uncharacterized protein LOC100791528 [Glycine max]
Glyma12g34701	942	45	95	5.67749	11.7088	1.04427	Up	3.84e-05	0.000468779	-	-	-	-	-
Glyma13g37750	1216	531	1121	51.8986	107.032	1.04427	Up	8.85e-46	1.82e-43	-	-	-	-	gi|351722593|ref|NP_001234946.1|/7.20197e-45/uncharacterized protein LOC100500480 [Glycine max]
Glyma04g04355	1650	119	251	8.57151	17.6616	1.04299	Up	2.02e-11	6.84e-10	K09286|1|1e-49|196|rcu:RCOM_1589590|EREBP-like factor	GO:0043231//intracellular membrane-bounded organelle;GO:0043231//intracellular membrane-bounded organelle	GO:0003676//nucleic acid binding;GO:0001071//nucleic acid binding transcription factor activity;GO:0003676//nucleic acid binding;GO:0001071//nucleic acid binding transcription factor activity	GO:0006351//transcription, DNA-dependent;GO:0006351//transcription, DNA-dependent	gi|356510467|ref|XP_003523959.1|/1.64462e-77/PREDICTED: ethylene-responsive transcription factor RAP2-1-like [Glycine max]
Glyma11g16120	1345	114	240	10.0734	20.7171	1.04027	Up	6.09e-11	1.94e-09	-	-	-	-	gi|255637660|gb|ACU19154.1|/1.00401e-85/unknown [Glycine max]
Glyma12g17710	1337	57	120	5.06685	10.4205	1.04027	Up	3.89e-06	6.02e-05	-	-	-	-	gi|357457671|ref|XP_003599116.1|/2.79502e-77/hypothetical protein MTR_3g028060 [Medicago truncatula]
Glyma18g47020	1026	354	745	41.0063	84.3041	1.03976	Up	8.8e-31	1.07e-28	K05283|1|2e-08|58.5|aly:ARALYDRAFT_354960|phosphatidylinositol glycan, class W [EC:2.3.-.-];K15692|2|1e-07|55.8|smo:SELMODRAFT_67002|E3 ubiquitin-protein ligase RNF13 [EC:6.3.2.19];K15083|3|5e-07|53.5|olu:OSTLU_36534|DNA repair protein RAD16;K06058|5|3e-06|50.8|smo:SELMODRAFT_119112|deltex	-	GO:0046872//metal ion binding	GO:0009725//response to hormone stimulus;GO:0009743//response to carbohydrate stimulus	gi|356568413|ref|XP_003552405.1|/1.02237e-78/PREDICTED: E3 ubiquitin-protein ligase RHA1B-like [Glycine max]
Glyma02g06020	1895	78	164	4.89192	10.0479	1.03842	Up	6.86e-08	1.48e-06	K13120|1|1e-129|461|vvi:100263357|protein FAM32A;K08900|2|3e-124|444|pop:POPTR_563200|mitochondrial chaperone BCS1	GO:0043231//intracellular membrane-bounded organelle	GO:0017111//nucleoside-triphosphatase activity;GO:0032559	-	gi|356502980|ref|XP_003520292.1|/0/PREDICTED: ATP-dependent zinc metalloprotease FtsH 1-like [Glycine max]
Glyma17g04710	1781	70	147	4.6712	9.58282	1.03666	Up	3.42e-07	6.59e-06	K13424|1|1e-17|90.1|zma:100281160|WRKY transcription factor 33	-	-	-	gi|356564689|ref|XP_003550582.1|/0/PREDICTED: WRKY transcription factor 6-like [Glycine max]
Glyma16g29661	885	130	273	17.458	35.8145	1.03666	Up	3.44e-12	1.28e-10	-	-	-	-	gi|351726122|ref|NP_001236092.1|/1.47923e-64/uncharacterized protein LOC100306254 [Glycine max]
Glyma16g26440	851	221	464	30.8643	63.3036	1.03635	Up	1.13e-19	7.58e-18	-	GO:0043231//intracellular membrane-bounded organelle	GO:0004551//nucleotide diphosphatase activity	-	gi|356561299|ref|XP_003548920.1|/5.79187e-111/PREDICTED: nudix hydrolase 12, mitochondrial-like [Glycine max]
Glyma15g02620	1616	61	128	4.48624	9.1962	1.03553	Up	2.02e-06	3.3e-05	-	-	GO:0046914//transition metal ion binding;GO:0003676//nucleic acid binding;GO:0001071//nucleic acid binding transcription factor activity	GO:0006351//transcription, DNA-dependent	gi|356556684|ref|XP_003546653.1|/9.11465e-65/PREDICTED: dof zinc finger protein DOF1.7-like [Glycine max]
Glyma14g39840	2300	1469	3082	75.9081	155.577	1.0353	Up	5.5e-121	5.81e-118	K10526|1|0.0|799|rcu:RCOM_1600450|OPC-8:0 CoA ligase 1 [EC:6.2.1.-]	GO:0042579//microbody;GO:0042579//microbody;GO:0042579//microbody	GO:0016703;GO:0016405//CoA-ligase activity;GO:0016703;GO:0016405//CoA-ligase activity;GO:0016703;GO:0016405//CoA-ligase activity	GO:0006725//cellular aromatic compound metabolic process;GO:0006950//response to stress;GO:0009694//jasmonic acid metabolic process;GO:0006950//response to stress;GO:0009694//jasmonic acid metabolic process;GO:0006725//cellular aromatic compound metabolic process;GO:0006950//response to stress;GO:0009694//jasmonic acid metabolic process	gi|356553319|ref|XP_003545004.1|/0/PREDICTED: 4-coumarate--CoA ligase-like 5-like [Glycine max]
Glyma15g12690	1556	124	260	9.47123	19.4001	1.03444	Up	1.22e-11	4.23e-10	K01115|1|2e-06|52.0|vvi:100241982|phospholipase D [EC:3.1.4.4]	GO:0043231//intracellular membrane-bounded organelle;GO:0016020//membrane;GO:0043231//intracellular membrane-bounded organelle;GO:0016020//membrane	-	-	gi|356545027|ref|XP_003540947.1|/8.37416e-92/PREDICTED: probable ADP-ribosylation factor GTPase-activating protein AGD11-like [Glycine max]
Glyma19g40070	1013	1648	3455	193.349	395.985	1.03424	Up	3.63e-135	5.23e-132	K09286|1|4e-31|133|zma:100284306|EREBP-like factor	-	-	-	gi|351727841|ref|NP_001235127.1|/2.14519e-105/uncharacterized protein LOC100527371 [Glycine max]
Glyma13g04630	1056	262	549	29.4871	60.3598	1.03351	Up	6.79e-23	5.46e-21	-	-	GO:0046914//transition metal ion binding	GO:0009743//response to carbohydrate stimulus;GO:0009725//response to hormone stimulus	gi|351721581|ref|NP_001237214.1|/5.28697e-104/uncharacterized protein LOC100500384 [Glycine max]
Glyma12g04300	1114	294	616	31.3658	64.2	1.03338	Up	1.72e-25	1.65e-23	-	-	-	-	gi|358248365|ref|NP_001240125.1|/2.4137e-68/uncharacterized protein LOC100804188 [Glycine max]
Glyma10g02080	1778	1811	3794	121.055	247.745	1.0332	Up	5.39e-148	1.01e-144	K09286|1|4e-33|141|gmx:100170723|EREBP-like factor	GO:0043231//intracellular membrane-bounded organelle	GO:0003676//nucleic acid binding;GO:0001071//nucleic acid binding transcription factor activity	GO:0006351//transcription, DNA-dependent	gi|359806120|ref|NP_001241446.1|/6.24748e-163/uncharacterized protein LOC100780763 [Glycine max]
Glyma11g11430	1683	74	155	5.22567	10.6927	1.03294	Up	1.78e-07	3.59e-06	-	GO:0016020//membrane	-	GO:0006970//response to osmotic stress;GO:0009642//response to light intensity	gi|356538632|ref|XP_003537805.1|/0/PREDICTED: uncharacterized protein LOC100802385 [Glycine max]
Glyma02g46810	5217	132	276	3.0071	6.14226	1.0304	Up	3.36e-12	1.25e-10	K05666|1|0.0|651|olu:OSTLU_35503|ATP-binding cassette, subfamily C (CFTR/MRP), member 2;K05658|2|1e-52|207|vvi:100259227|ATP-binding cassette, subfamily B (MDR/TAP), member 1	GO:0031224//intrinsic to membrane	GO:0017111//nucleoside-triphosphatase activity;GO:0015405;GO:0032559	GO:0006810//transport;GO:0009207	gi|356499431|ref|XP_003518544.1|/0/PREDICTED: ABC transporter C family member 3-like [Glycine max]
Glyma05g34730	4402	121	253	3.26685	6.67283	1.0304	Up	2.65e-11	8.79e-10	K10144|1|3e-55|216|bdi:100828315|RING finger and CHY zinc finger domain-containing protein 1 [EC:6.3.2.19]	-	GO:0046914//transition metal ion binding	GO:0003006//developmental process involved in reproduction;GO:0009267//cellular response to starvation	gi|356513068|ref|XP_003525236.1|/0/PREDICTED: uncharacterized protein LOC100801725 [Glycine max]
Glyma07g02420	2234	267	558	14.2044	28.9995	1.02969	Up	4.1e-23	3.33e-21	-	-	-	-	gi|356523161|ref|XP_003530210.1|/0/PREDICTED: uncharacterized protein LOC100808320 [Glycine max]
Glyma14g35220	1740	1375	2872	93.9178	191.635	1.02889	Up	9.49e-112	8.22e-109	K13030|1|9e-109|392|sbi:SORBI_01g001220|cyanohydrin beta-glucosyltransferase [EC:2.4.1.85];K13068|2|3e-67|254|aly:ARALYDRAFT_479675|sinapate 1-glucosyltransferase [EC:2.4.1.120];K13228|4|1e-63|242|zma:100274317|UDP-glucosyltransferase BX9 [EC:2.4.1.202];K13692|5|3e-63|241|vvi:100252177|UDP-glucose:(indol-3-yl)acetate beta-D-glucosyltransferase [EC:2.4.1.121]	-	GO:0035251//UDP-glucosyltransferase activity	-	gi|356552900|ref|XP_003544800.1|/0/PREDICTED: UDP-glycosyltransferase 85A2-like [Glycine max]
Glyma14g08801	2934	70	146	2.83552	5.7774	1.02681	Up	4.61e-07	8.67e-06	K13414|1|8e-36|150|sbi:SORBI_01g040360|mitogen-activated protein kinase kinase kinase 1, plant [EC:2.7.11.25];K11228|2|1e-35|150|ota:Ot13g01170|mitogen-activated protein kinase kinase kinase [EC:2.7.11.1]	-	-	-	gi|356553923|ref|XP_003545300.1|/0/PREDICTED: MAP kinase kinase kinase mkh1-like [Glycine max]
Glyma02g03190	1850	129	269	8.28729	16.8819	1.0265	Up	7.31e-12	2.61e-10	K07761|1|1e-97|355|ath:AT1G59970|gelatinase A [EC:3.4.24.24]	GO:0031224//intrinsic to membrane	GO:0046872//metal ion binding;GO:0004175//endopeptidase activity	GO:0019538//protein metabolic process	gi|356501971|ref|XP_003519796.1|/0/PREDICTED: metalloendoproteinase 1-like [Glycine max]
Glyma04g35560	1647	603	1257	43.5129	88.6097	1.02602	Up	1.02e-49	2.26e-47	-	-	-	-	gi|356508673|ref|XP_003523079.1|/4.35549e-163/PREDICTED: probable inactive poly [ADP-ribose] polymerase SRO5-like [Glycine max]
Glyma04g08390	1359	60	125	5.24718	10.679	1.02516	Up	3.21e-06	5.04e-05	-	-	-	-	gi|356507865|ref|XP_003522683.1|/4.7307e-64/PREDICTED: uncharacterized protein LOC100798503 [Glycine max]
Glyma19g01780	2135	374	779	20.8194	42.3623	1.02485	Up	2.13e-31	2.65e-29	K00517|1|1e-130|465|ath:AT4G31940|[EC:1.14.-.-];K05280|2|3e-90|331|pop:POPTR_823742|flavonoid 3'-monooxygenase [EC:1.14.13.21]	GO:0044464//cell part	GO:0016491//oxidoreductase activity;GO:0005506//iron ion binding	GO:0008152//metabolic process	gi|356571829|ref|XP_003554074.1|/0/PREDICTED: cytochrome P450 82A3-like [Glycine max]
Glyma20g24780	1514	185	385	14.5225	29.524	1.0236	Up	2.8e-16	1.49e-14	K14493|1|4e-39|160|ppp:PHYPADRAFT_118478|gibberellin receptor GID1 [EC:3.-.-.-];K13258|2|8e-34|143|gmx:547489|2-hydroxyisoflavanone dehydratase [EC:4.2.1.105]	-	-	-	gi|356574179|ref|XP_003555229.1|/0/PREDICTED: probable carboxylesterase 17-like [Glycine max]
Glyma07g10311	1208	62	129	6.09985	12.3983	1.0233	Up	2.31e-06	3.74e-05	K12126|1|5e-12|70.5|ath:AT1G09530|phytochrome-interacting factor 3;K10863|3|1e-05|49.7|aly:ARALYDRAFT_486946|aprataxin [EC:3.-.-.-]	GO:0043231//intracellular membrane-bounded organelle	-	-	gi|356520601|ref|XP_003528950.1|/6.07765e-145/PREDICTED: transcription factor BEE 3-like [Glycine max]
Glyma13g36120	2701	497	1034	21.8689	44.4463	1.02319	Up	5.05e-41	8.92e-39	K14494|1|4e-59|228|ppp:PHYPADRAFT_235432|DELLA protein	-	-	-	gi|356549809|ref|XP_003543283.1|/0/PREDICTED: chitin-inducible gibberellin-responsive protein 1-like [Glycine max]
Glyma10g09980	1489	88	183	7.02397	14.2691	1.02254	Up	1.81e-08	4.23e-07	-	-	-	-	gi|356534542|ref|XP_003535812.1|/5.2383e-128/PREDICTED: uncharacterized protein LOC100790193 [Glycine max]
Glyma06g04490	1737	152	316	10.4001	21.1216	1.02212	Up	1.35e-13	5.68e-12	K09286|1|5e-43|174|rcu:RCOM_1589590|EREBP-like factor	GO:0043231//intracellular membrane-bounded organelle;GO:0043231//intracellular membrane-bounded organelle	GO:0003676//nucleic acid binding;GO:0001071//nucleic acid binding transcription factor activity;GO:0003676//nucleic acid binding;GO:0001071//nucleic acid binding transcription factor activity	GO:0006351//transcription, DNA-dependent;GO:0006351//transcription, DNA-dependent	gi|238535496|gb|ACR44231.1|/1.26593e-67/drought responsive element binding protein 2 [Glycine max]
Glyma14g02350	1952	482	1002	29.3469	59.5974	1.02204	Up	9.77e-40	1.67e-37	K14489|1|2e-19|96.3|vvi:100263145|arabidopsis histidine kinase 2/3/4 (cytokinin receptor) [EC:2.7.13.3]	GO:0044464//cell part	GO:0043167//ion binding;GO:0008422//beta-glucosidase activity	GO:0044238//primary metabolic process	gi|356552845|ref|XP_003544773.1|/0/PREDICTED: glucan endo-1,3-beta-glucosidase 12-like [Glycine max]
Glyma13g21690	1909	65	135	4.04671	8.21046	1.02071	Up	1.41e-06	2.38e-05	-	-	-	-	gi|356548311|ref|XP_003542546.1|/0/PREDICTED: uncharacterized protein LOC100806520 [Glycine max]
Glyma07g02630	1809	362	751	23.7829	48.1993	1.01909	Up	4.59e-30	5.46e-28	K13424|1|4e-16|84.7|vvi:100243352|WRKY transcription factor 33	-	-	-	gi|356523273|ref|XP_003530265.1|/4.32052e-135/PREDICTED: probable WRKY transcription factor 40-like isoform 1 [Glycine max]
Glyma13g31870	471	56	116	14.1306	28.5941	1.01689	Up	8.39e-06	0.000121138	-	-	-	-	gi|356524738|ref|XP_003530985.1|/1.37161e-14/PREDICTED: uncharacterized protein LOC100798405 [Glycine max]
Glyma06g11990	1662	85	176	6.0783	12.2948	1.01631	Up	3.98e-08	8.93e-07	K00924|1|6e-33|140|aly:ARALYDRAFT_489138|[EC:2.7.1.-]	GO:0005618//cell wall	GO:0008233//peptidase activity	-	gi|356515904|ref|XP_003526637.1|/0/PREDICTED: aspartic proteinase Asp1-like [Glycine max]
Glyma16g33810	1486	57	118	4.5588	9.21941	1.01602	Up	7.11e-06	0.00010406	-	-	-	-	gi|356531064|ref|XP_003534098.1|/1.7512e-99/PREDICTED: putative GEM-like protein 8-like [Glycine max]
Glyma17g35190	1049	228	472	25.8317	52.2404	1.01602	Up	2.14e-19	1.4e-17	-	GO:0016020//membrane	-	-	gi|356564111|ref|XP_003550300.1|/8.03004e-87/PREDICTED: uncharacterized protein LOC100793150 [Glycine max]
Glyma09g41180	1619	44	91	3.22998	6.52581	1.01463	Up	8.34e-05	0.000933759	K05283|1|6e-15|80.9|aly:ARALYDRAFT_354960|phosphatidylinositol glycan, class W [EC:2.3.-.-];K11982|2|1e-10|66.6|zma:100383341|E3 ubiquitin-protein ligase RNF115/126 [EC:6.3.2.19];K15692|3|5e-10|64.3|smo:SELMODRAFT_67002|E3 ubiquitin-protein ligase RNF13 [EC:6.3.2.19]	-	GO:0046872//metal ion binding	-	gi|356530175|ref|XP_003533659.1|/3.945e-84/PREDICTED: RING-H2 finger protein ATL73-like [Glycine max]
Glyma05g37350	1172	89	184	9.0252	18.2276	1.0141	Up	2.07e-08	4.79e-07	K03239|1|2e-13|75.5|ath:AT1G53880|translation initiation factor eIF-2B subunit alpha	-	-	-	gi|358249034|ref|NP_001239726.1|/4.18484e-127/uncharacterized protein LOC100782098 [Glycine max]
Glyma08g05810	1380	572	1181	49.2619	99.3598	1.01219	Up	8.06e-46	1.67e-43	K13448|1|1e-46|186|vvi:100264572|calcium-binding protein CML	GO:0016020//membrane;GO:0043231//intracellular membrane-bounded organelle;GO:0016020//membrane;GO:0043231//intracellular membrane-bounded organelle;GO:0016020//membrane;GO:0043231//intracellular membrane-bounded organelle	GO:0046872//metal ion binding;GO:0046872//metal ion binding;GO:0046872//metal ion binding	-	gi|356524678|ref|XP_003530955.1|/3.17037e-81/PREDICTED: calcium-binding allergen Ole e 8-like [Glycine max]
Glyma07g07580	2025	80	165	4.69526	9.46016	1.01066	Up	1.21e-07	2.5e-06	K13508|1|0.0|708|mtr:MTR_8g030620|glycerol-3-phosphate acyltransferase [EC:2.3.1.15]	GO:0043231//intracellular membrane-bounded organelle	GO:0008374//O-acyltransferase activity;GO:0016411//acylglycerol O-acyltransferase activity	GO:0006633//fatty acid biosynthetic process;GO:0006633//fatty acid biosynthetic process	gi|356520398|ref|XP_003528849.1|/0/PREDICTED: probable glycerol-3-phosphate acyltransferase 8-like [Glycine max]
Glyma14g06640	1708	96	198	6.68002	13.4591	1.01066	Up	6.63e-09	1.65e-07	-	-	-	-	gi|356553794|ref|XP_003545237.1|/0/PREDICTED: nematode resistance protein-like HSPRO2-like [Glycine max]
Glyma16g01940	2034	162	334	9.46582	19.0649	1.01012	Up	4.83e-14	2.12e-12	-	-	-	-	gi|356560211|ref|XP_003548387.1|/2.7884e-170/PREDICTED: NAC domain-containing protein 69-like [Glycine max]
Glyma10g04710	1013	51	105	5.9835	12.0343	1.00809	Up	2.59e-05	0.000330961	-	GO:0009536//plastid	GO:0005488//binding;GO:0016773//phosphotransferase activity, alcohol group as acceptor	GO:0019321//pentose metabolic process;GO:0006796//phosphate-containing compound metabolic process	gi|356537220|ref|XP_003537127.1|/3.47095e-172/PREDICTED: ribokinase-like [Glycine max]
Glyma08g01350	976	102	210	12.4207	24.981	1.00809	Up	2.5e-09	6.55e-08	K14488|1|9e-20|95.9|rcu:RCOM_1078910|SAUR family protein	-	-	-	gi|462405777|gb|EMJ11241.1|/7.5853e-20/hypothetical protein PRUPE_ppa017538mg [Prunus persica]
Glyma04g38020	743	52	107	8.31781	16.7199	1.00729	Up	2.2e-05	0.000286761	-	GO:0016020//membrane	-	-	gi|356508888|ref|XP_003523185.1|/3.52736e-63/PREDICTED: uncharacterized protein LOC100803290 [Glycine max]
Glyma16g08470	1527	526	1082	40.9394	82.2674	1.00683	Up	9.01e-42	1.63e-39	K06892|1|5e-177|619|gmx:100794532|	-	GO:0046914//transition metal ion binding;GO:0016706//oxidoreductase activity, acting on paired donors, with incorporation or reduction of molecular oxygen, 2-oxoglutarate as one donor, and incorporation of one atom each of oxygen into both donors;GO:0016701//oxidoreductase activity, acting on single donors with incorporation of molecular oxygen;GO:0046914//transition metal ion binding;GO:0016706/…	GO:0051553;GO:0051553	gi|255641899|gb|ACU21218.1|/0/unknown [Glycine max]
Glyma01g41520	1504	71	146	5.61054	11.2705	1.00634	Up	7.09e-07	1.28e-05	K09286|1|3e-58|224|ath:AT4G17500|EREBP-like factor;K14517|2|5e-48|190|ath:AT5G47220|ethylene-responsive transcription factor 2	-	-	-	gi|356540552|ref|XP_003538752.1|/3.82143e-102/PREDICTED: ethylene-responsive transcription factor 1A-like [Glycine max]
Glyma05g36110	1932	90	185	5.53643	11.1174	1.0058	Up	2.36e-08	5.42e-07	K15172|1|5e-27|121|vcn:VOLCADRAFT_106802|transcription elongation factor SPT5	-	GO:0005488//binding	-	gi|356513195|ref|XP_003525299.1|/0/PREDICTED: zinc finger CCCH domain-containing protein 20-like [Glycine max]
Glyma19g35420	1763	54	111	3.64029	7.30988	1.0058	Up	1.58e-05	0.00021295	K11816|1|0.0|677|aly:ARALYDRAFT_494616|YUCCA family monooxygenase [EC:1.14.13.-]	-	GO:0016709//oxidoreductase activity, acting on paired donors, with incorporation or reduction of molecular oxygen, NAD(P)H as one donor, and incorporation of one atom of oxygen;GO:0050662//coenzyme binding;GO:0000166//nucleotide binding	GO:0043401//steroid hormone mediated signaling pathway;GO:0009850//auxin metabolic process	gi|356572315|ref|XP_003554314.1|/0/PREDICTED: flavin-containing monooxygenase YUCCA8-like [Glycine max]
Glyma14g39350	2026	625	1284	36.6636	73.5809	1.00498	Up	4.2e-49	9.09e-47	K00924|1|5e-18|91.3|ath:AT5G22850|[EC:2.7.1.-]	GO:0044464//cell part	GO:0004175//endopeptidase activity	GO:0019538//protein metabolic process	gi|356553263|ref|XP_003544977.1|/0/PREDICTED: aspartic proteinase nepenthesin-1-like [Glycine max]
Glyma06g08120	1557	833	1710	63.5844	127.511	1.00387	Up	1.09e-64	3.79e-62	K13425|1|3e-20|98.2|rcu:RCOM_1616660|WRKY transcription factor 22;K13426|4|5e-19|94.4|vvi:100251862|WRKY transcription factor 29	GO:0043231//intracellular membrane-bounded organelle	GO:0003677//DNA binding;GO:0001071//nucleic acid binding transcription factor activity;GO:0005515//protein binding	GO:0006351//transcription, DNA-dependent;GO:0006952//defense response;GO:0009743//response to carbohydrate stimulus	gi|351726405|ref|NP_001238661.1|/6.32326e-140/transcription factor [Glycine max]
Glyma1555s00200	550	114	234	24.6341	49.3961	1.00374	Up	3.57e-10	1.03e-08	-	-	-	-	gi|323435055|ref|YP_004222273.1|/5.00484e-08/hypothetical protein BevumaM_p035 [Beta vulgaris subsp. maritima]
Glyma18g50080	1758	58	119	3.92106	7.85901	1.0031	Up	8.12e-06	0.00011765	K13691|1|2e-56|218|mtr:MTR_7g080940|pathogen-inducible salicylic acid glucosyltransferase [EC:2.4.1.-];K13692|2|6e-55|213|vvi:100252177|UDP-glucose:(indol-3-yl)acetate beta-D-glucosyltransferase [EC:2.4.1.121]	-	-	-	gi|356568728|ref|XP_003552562.1|/0/PREDICTED: UDP-glycosyltransferase 83A1-like [Glycine max]
Glyma03g38040	1644	369	757	26.6759	53.4606	1.00294	Up	1.51e-29	1.73e-27	K09422|1|2e-66|251|vvi:100260647|myb proto-oncogene protein, plant	GO:0043231//intracellular membrane-bounded organelle	GO:0003676//nucleic acid binding	-	gi|244539459|dbj|BAH83498.1|/1.79295e-108/MYB12 transcription factor a [Glycine max]
Glyma04g04910	1287	21	1	1.93926	0.0902113	-4.42605	Down	4.47e-06	6.83e-05	-	-	-	-	gi|356510580|ref|XP_003524015.1|/1.10875e-83/PREDICTED: uncharacterized protein LOC100781345 [Glycine max]
Glyma19g03760	1760	75	4	5.06457	0.263868	-4.26255	Down	1.18e-18	7.33e-17	K14329|1|8e-63|239|ath:AT5G61160|agmatine coumaroyltransferase [EC:2.3.1.64 2.3.1.-];K13065|3|8e-18|90.5|pop:POPTR_784746|shikimate O-hydroxycinnamoyltransferase [EC:2.3.1.133]	-	-	-	gi|356573487|ref|XP_003554890.1|/0/PREDICTED: agmatine coumaroyltransferase-like [Glycine max]
Glyma19g33460	2344	17	1	0.861957	0.0495316	-4.1212	Down	6.24e-05	0.000722717	K04733|1|3e-55|215|smo:SELMODRAFT_159261|interleukin-1 receptor-associated kinase 4 [EC:2.7.11.1];K13430|4|7e-49|194|sbi:SORBI_04g020990|serine/threonine-protein kinase PBS1 [EC:2.7.11.1]	GO:0016020//membrane	GO:0005488//binding;GO:0004674//protein serine/threonine kinase activity	-	gi|356570548|ref|XP_003553447.1|/0/PREDICTED: probable LRR receptor-like serine/threonine-protein kinase RKF3-like [Glycine max]
Glyma05g16706	971	30	2	3.67195	0.239139	-3.94062	Down	9.29e-08	1.96e-06	-	-	-	-	gi|358345829|ref|XP_003636977.1|/9.2258e-18/hypothetical protein MTR_066s1004 [Medicago truncatula]
Glyma09g05340	1038	36	3	4.12192	0.335555	-3.6187	Down	1.3e-08	3.1e-07	K00430|1|9e-162|567|gmx:100798229|peroxidase [EC:1.11.1.7]	-	GO:0046872//metal ion binding;GO:0003824//catalytic activity	-	gi|356558221|ref|XP_003547406.1|/1.09197e-160/PREDICTED: peroxidase 7-like [Glycine max]
Glyma01g43920	1632	22	2	1.60213	0.142282	-3.49316	Down	1.51e-05	0.000205722	-	-	-	-	gi|356540363|ref|XP_003538659.1|/0/PREDICTED: uncharacterized protein LOC100811439 [Glycine max]
Glyma19g03770	1395	237	22	20.1915	1.831	-3.46304	Down	4.48e-48	9.55e-46	K14329|1|1e-62|239|ath:AT5G61160|agmatine coumaroyltransferase [EC:2.3.1.64 2.3.1.-];K13065|3|9e-19|93.2|sbi:SORBI_04g025760|shikimate O-hydroxycinnamoyltransferase [EC:2.3.1.133]	-	-	-	gi|356573495|ref|XP_003554894.1|/0/PREDICTED: agmatine coumaroyltransferase-like [Glycine max]
Glyma02g05470	1526	21	2	1.63553	0.152165	-3.42605	Down	2.83e-05	0.000357547	K00475|1|0.0|727|gmx:732548|naringenin 3-dioxygenase [EC:1.14.11.9]	-	GO:0003824//catalytic activity	GO:0008152//metabolic process	gi|51556895|gb|AAU06218.1|/0/flavanone 3-hydroxylase [Glycine max]
Glyma08g42440	1974	178	17	10.7169	0.999865	-3.422	Down	4.17e-36	6.4e-34	K13065|1|1e-76|286|rcu:RCOM_1442250|shikimate O-hydroxycinnamoyltransferase [EC:2.3.1.133]	-	-	-	gi|356527016|ref|XP_003532110.1|/0/PREDICTED: hydroxycinnamoyl-Coenzyme A shikimate/quinate hydroxycinnamoyltransferase-like [Glycine max]
Glyma06g07460	1457	20	2	1.63142	0.159371	-3.35566	Down	5.27e-05	0.000620534	-	GO:0005618//cell wall;GO:0005618//cell wall	-	-	gi|363807894|ref|NP_001242447.1|/0/uncharacterized protein LOC100802444 precursor [Glycine max]
Glyma09g37050	1659	91	10	6.51913	0.699831	-3.2196	Down	3.57e-18	2.15e-16	-	-	-	-	gi|356529918|ref|XP_003533533.1|/0/PREDICTED: NAC domain-containing protein 100-like [Glycine max]
Glyma10g08871	1946	50	6	3.05367	0.357971	-3.09263	Down	3.33e-10	9.68e-09	K09287|1|3e-38|158|pop:POPTR_566667|RAV-like factor	GO:0043231//intracellular membrane-bounded organelle	GO:0003676//nucleic acid binding;GO:0001071//nucleic acid binding transcription factor activity	GO:0006351//transcription, DNA-dependent;GO:0009628//response to abiotic stimulus	gi|356537126|ref|XP_003537081.1|/7.28419e-144/PREDICTED: B3 domain-containing protein At5g06250-like [Glycine max]
Glyma04g07420	4728	50	6	1.25686	0.147338	-3.09263	Down	3.33e-10	9.67e-09	K05681|1|2e-47|190|olu:OSTLU_38326|ATP-binding cassette, subfamily G (WHITE), member 2;K12843|5|5e-47|189|vvi:100248403|U4/U6 small nuclear ribonucleoprotein PRP3	GO:0044464//cell part	GO:0042626//ATPase activity, coupled to transmembrane movement of substances;GO:0015604//organic phosphonate transmembrane transporter activity;GO:0032559	GO:0009207	gi|356507758|ref|XP_003522631.1|/0/PREDICTED: pleiotropic drug resistance protein 1-like [Glycine max]
Glyma18g12660	2445	305	37	14.8257	1.75696	-3.07695	Down	3.3e-55	8.35e-53	K12450|1|0.0|1027|vvi:100260586|UDP-glucose 4,6-dehydratase [EC:4.2.1.76]	-	GO:0016616//oxidoreductase activity, acting on the CH-OH group of donors, NAD or NADP as acceptor;GO:0048037//cofactor binding;GO:0016836//hydro-lyase activity;GO:0016616//oxidoreductase activity, acting on the CH-OH group of donors, NAD or NADP as acceptor;GO:0048037//cofactor binding;GO:0016836//hydro-lyase activity;GO:0016616//oxidoreductase activity, acting on the CH-OH group of donors, NAD o…	GO:0009226//nucleotide-sugar biosynthetic process;GO:0051553;GO:0009734//auxin mediated signaling pathway;GO:0033692//cellular polysaccharide biosynthetic process;GO:0009226//nucleotide-sugar biosynthetic process;GO:0051553;GO:0009734//auxin mediated signaling pathway;GO:0033692//cellular polysaccharide biosynthetic process;GO:0009226//nucleotide-sugar biosynthetic process;GO:0051553;GO:0009734//…	gi|356567412|ref|XP_003551914.1|/0/PREDICTED: probable rhamnose biosynthetic enzyme 1-like [Glycine max]
Glyma01g01790	2177	38	5	2.07453	0.266656	-2.95973	Down	9.39e-08	1.98e-06	K06889|1|3e-07|55.5|ota:Ot02g04790|	GO:0016020//membrane;GO:0016020//membrane;GO:0016020//membrane	-	-	gi|357485023|ref|XP_003612799.1|/3.59226e-163/Abhydrolase domain-containing protein FAM108C1 [Medicago truncatula]
Glyma09g41760	1998	57	8	3.39058	0.464873	-2.86662	Down	9.93e-11	3.09e-09	-	-	-	-	gi|356530225|ref|XP_003533683.1|/0/PREDICTED: BTB/POZ domain-containing protein At3g19850-like [Glycine max]
Glyma07g00590	2889	39	6	1.6044	0.241126	-2.73417	Down	2.07e-07	4.15e-06	K13680|1|6e-109|394|smo:SELMODRAFT_230176|beta-mannan synthase [EC:2.4.1.32]	GO:0043231//intracellular membrane-bounded organelle	GO:0046527//glucosyltransferase activity	-	gi|356523457|ref|XP_003530355.1|/0/PREDICTED: probable xyloglucan glycosyltransferase 5-like [Glycine max]
Glyma08g40670	1683	590	92	41.6641	6.34663	-2.71474	Down	1.25e-92	8.34e-90	K09510|1|1e-92|338|vvi:100246709|DnaJ homolog subfamily B member 4;K09519|3|3e-74|277|sbi:SORBI_09g002340|DnaJ homolog subfamily B member 13	-	GO:0005515//protein binding	-	gi|356526884|ref|XP_003532046.1|/7.38533e-166/PREDICTED: dnaJ homolog subfamily B member 5-like [Glycine max]
Glyma01g41310	1681	38	6	2.68664	0.414403	-2.6967	Down	3.66e-07	7.01e-06	K00261|1|0.0|833|gmx:100801250|glutamate dehydrogenase (NAD(P)+) [EC:1.4.1.3]	GO:0031090//organelle membrane;GO:0043231//intracellular membrane-bounded organelle	GO:0046914//transition metal ion binding;GO:0016639//oxidoreductase activity, acting on the CH-NH2 group of donors, NAD or NADP as acceptor;GO:0032559	GO:0006970//response to osmotic stress;GO:0019752//carboxylic acid metabolic process;GO:0010038//response to metal ion	gi|356497088|ref|XP_003517396.1|/0/PREDICTED: glutamate dehydrogenase 2-like [Glycine max]
Glyma18g43980	1732	81	13	5.55817	0.871435	-2.67314	Down	9.2e-14	3.92e-12	K13496|1|6e-97|353|ath:AT2G36800|UDP-glucosyl transferase 73C [EC:2.4.1.-]	-	GO:0016757//transferase activity, transferring glycosyl groups	-	gi|356568166|ref|XP_003552284.1|/0/PREDICTED: UDP-glycosyltransferase 73B5-like [Glycine max]
Glyma07g16760	1325	31	5	2.78061	0.438121	-2.666	Down	5.38e-06	8.07e-05	-	-	-	-	gi|351722410|ref|NP_001237499.1|/1.7286e-79/uncharacterized protein LOC100306610 [Glycine max]
Glyma13g07160	1584	54	9	4.05166	0.65967	-2.6187	Down	2.05e-09	5.43e-08	-	-	-	-	gi|356551072|ref|XP_003543902.1|/0/PREDICTED: uncharacterized protein LOC100814731 [Glycine max]
Glyma08g23820	3117	68	12	2.59279	0.446976	-2.53623	Down	3.58e-11	1.16e-09	K13680|1|2e-109|395|smo:SELMODRAFT_230176|beta-mannan synthase [EC:2.4.1.32]	GO:0043231//intracellular membrane-bounded organelle	GO:0046527//glucosyltransferase activity	-	gi|356523457|ref|XP_003530355.1|/0/PREDICTED: probable xyloglucan glycosyltransferase 5-like [Glycine max]
Glyma02g11640	1748	823	146	55.9568	9.69731	-2.52866	Down	8.24e-119	8.11e-116	K13496|1|2e-110|398|ath:AT2G36780|UDP-glucosyl transferase 73C [EC:2.4.1.-]	-	GO:0016758//transferase activity, transferring hexosyl groups	-	gi|356499771|ref|XP_003518710.1|/0/PREDICTED: UDP-glycosyltransferase 73B3-like [Glycine max]
Glyma09g36650	978	32	6	3.88871	0.712282	-2.44877	Down	1.04e-05	0.000146036	K01051|1|2e-14|78.2|pop:POPTR_553829|pectinesterase [EC:3.1.1.11]	-	-	-	gi|356531700|ref|XP_003534414.1|/1.65938e-99/PREDICTED: 21 kDa protein-like [Glycine max]
Glyma13g11150	1721	146	28	10.0825	1.88893	-2.4162	Down	2.68e-21	1.99e-19	K13420|1|7e-29|127|sbi:SORBI_06g028760|LRR receptor-like serine/threonine-protein kinase FLS2 [EC:2.7.11.1]	-	-	-	gi|356551279|ref|XP_003544004.1|/0/PREDICTED: leucine-rich repeat receptor-like serine/threonine-protein kinase BAM2-like [Glycine max]
Glyma04g13590	1106	52	10	5.58782	1.04975	-2.41224	Down	2.03e-08	4.69e-07	K01051|1|3e-10|64.3|pop:POPTR_553829|pectinesterase [EC:3.1.1.11]	-	-	-	gi|351720750|ref|NP_001236163.1|/3.5134e-112/uncharacterized protein LOC100527443 [Glycine max]
Glyma15g14540	2255	31	6	1.63384	0.308919	-2.40297	Down	1.78e-05	0.00023802	K01184|1|1e-99|362|rcu:RCOM_1063390|polygalacturonase [EC:3.2.1.15]	-	GO:0004553//hydrolase activity, hydrolyzing O-glycosyl compounds	GO:0044238//primary metabolic process;GO:0045229//external encapsulating structure organization	gi|356555962|ref|XP_003546297.1|/0/PREDICTED: polygalacturonase At1g48100-like isoform 1 [Glycine max]
Glyma04g34080	965	76	15	9.3601	1.80469	-2.37477	Down	1.56e-11	5.36e-10	-	GO:0043231//intracellular membrane-bounded organelle	GO:0005488//binding;GO:0001071//nucleic acid binding transcription factor activity	GO:0043401//steroid hormone mediated signaling pathway;GO:0010015//root morphogenesis	gi|351724407|ref|NP_001235265.1|/1.40244e-34/uncharacterized protein LOC100527636 [Glycine max]
Glyma06g08400	760	59	12	9.22641	1.83319	-2.33141	Down	4.55e-09	1.15e-07	K13448|1|3e-12|70.5|ath:AT5G44460|calcium-binding protein CML	-	GO:0046872//metal ion binding	GO:0000904//cell morphogenesis involved in differentiation;GO:0010038//response to metal ion	gi|356515560|ref|XP_003526467.1|/4.02783e-86/PREDICTED: uncharacterized protein LOC100781375 [Glycine max]
Glyma20g24460	1775	34	7	2.27654	0.457867	-2.31384	Down	1.08e-05	0.000151584	-	-	-	-	gi|356575496|ref|XP_003555876.1|/2.7918e-171/PREDICTED: uncharacterized protein LOC100804177 [Glycine max]
Glyma10g29190	839	72	15	10.1992	2.07572	-2.29677	Down	1.28e-10	3.94e-09	-	-	-	-	gi|351724055|ref|NP_001237812.1|/6.57001e-68/uncharacterized protein LOC100306373 [Glycine max]
Glyma06g02630	987	124	26	14.9313	3.05841	-2.28749	Down	3.09e-17	1.77e-15	-	GO:0031224//intrinsic to membrane	-	GO:0009607//response to biotic stimulus	gi|356517970|ref|XP_003527657.1|/7.68205e-177/PREDICTED: thaumatin-like protein 1-like [Glycine max]
Glyma15g16710	1261	104	22	9.80195	2.02557	-2.27474	Down	1.37e-14	6.34e-13	K00430|1|0.0|676|gmx:100798229|peroxidase [EC:1.11.1.7]	-	GO:0005506//iron ion binding;GO:0003824//catalytic activity;GO:0016209//antioxidant activity	GO:0008152//metabolic process;GO:0006950//response to stress	gi|356558221|ref|XP_003547406.1|/0/PREDICTED: peroxidase 7-like [Glycine max]
Glyma19g31271	1684	28	6	1.97611	0.413665	-2.25613	Down	8.86e-05	0.000986194	K13457|1|2e-36|152|pop:POPTR_755797|disease resistance protein RPM1	-	-	-	gi|356577353|ref|XP_003556791.1|/1.03706e-83/PREDICTED: disease resistance protein RPM1-like [Glycine max]
Glyma06g21730	2435	42	9	2.04996	0.429124	-2.25613	Down	1.36e-06	2.3e-05	-	-	-	-	gi|356513505|ref|XP_003525454.1|/2.68192e-122/PREDICTED: uncharacterized protein LOC100781747 [Glycine max]
Glyma11g02940	1869	32	7	2.03486	0.434839	-2.22638	Down	3.09e-05	0.000386447	K15631|1|8e-08|57.4|rcu:RCOM_1575730|molybdenum cofactor sulfurtransferase [EC:2.8.1.9]	-	-	-	gi|356540470|ref|XP_003538712.1|/0/PREDICTED: molybdenum cofactor sulfurase-like [Glycine max]
Glyma17g13380	1516	54	12	4.2334	0.919013	-2.20366	Down	6.15e-08	1.34e-06	-	GO:0043234//protein complex	GO:0004721//phosphoprotein phosphatase activity;GO:0043169//cation binding	GO:0006464//cellular protein modification process	gi|356563141|ref|XP_003549823.1|/1.04012e-147/PREDICTED: uncharacterized protein LOC100802860 [Glycine max]
Glyma13g30300	2555	62	14	2.884	0.636175	-2.18057	Down	7.88e-09	1.93e-07	-	-	-	-	gi|356546581|ref|XP_003541703.1|/0/PREDICTED: uncharacterized protein LOC100811677 [Glycine max]
Glyma15g01230	1035	35	8	4.01904	0.897407	-2.16302	Down	1.82e-05	0.000242039	-	-	-	-	gi|388499214|gb|AFK37673.1|/9.25083e-11/unknown [Medicago truncatula]
Glyma18g12280	1737	148	34	10.1264	2.27258	-2.15572	Down	5.79e-19	3.65e-17	K13065|1|2e-80|298|rcu:RCOM_1442250|shikimate O-hydroxycinnamoyltransferase [EC:2.3.1.133]	-	-	-	gi|356569861|ref|XP_003553113.1|/0/PREDICTED: hydroxycinnamoyl-Coenzyme A shikimate/quinate hydroxycinnamoyltransferase-like [Glycine max]
Glyma15g05710	2278	224	52	11.6866	2.65027	-2.14065	Down	1.05e-27	1.1e-25	K13496|1|3e-31|135|ath:AT2G36800|UDP-glucosyl transferase 73C [EC:2.4.1.-]	-	GO:0016757//transferase activity, transferring glycosyl groups;GO:0016757//transferase activity, transferring glycosyl groups	-	gi|356558606|ref|XP_003547595.1|/0/PREDICTED: UDP-glycosyltransferase 91A1-like [Glycine max]
Glyma19g37760	4795	336	78	8.32808	1.88862	-2.14065	Down	8.94e-41	1.56e-38	K05681|1|1e-47|191|cme:CMS467C|ATP-binding cassette, subfamily G (WHITE), member 2;K12843|3|6e-47|188|vvi:100248403|U4/U6 small nuclear ribonucleoprotein PRP3	GO:0044464//cell part;GO:0044464//cell part	GO:0017111//nucleoside-triphosphatase activity;GO:0015604//organic phosphonate transmembrane transporter activity;GO:0032559;GO:0017111//nucleoside-triphosphatase activity;GO:0015604//organic phosphonate transmembrane transporter activity;GO:0032559	GO:0009207;GO:0009207	gi|356572530|ref|XP_003554421.1|/0/PREDICTED: ABC transporter G family member 39-like [Glycine max]
Glyma16g07970	1971	43	10	2.59284	0.589051	-2.13807	Down	2.25e-06	3.66e-05	K08232|1|0.0|885|gmx:100816879|monodehydroascorbate reductase (NADH) [EC:1.6.5.4]	GO:0044439	GO:0016667//oxidoreductase activity, acting on a sulfur group of donors;GO:0016655//oxidoreductase activity, acting on NAD(P)H, quinone or similar compound as acceptor;GO:0050662//coenzyme binding	GO:0042743//hydrogen peroxide metabolic process;GO:0006091//generation of precursor metabolites and energy	gi|356558865|ref|XP_003547723.1|/0/PREDICTED: probable monodehydroascorbate reductase, cytoplasmic isoform 2-like [Glycine max]
Glyma13g39710	1709	188	44	13.0741	2.98917	-2.12889	Down	2.41e-23	2.01e-21	K08235|1|1e-168|591|gmx:100796768|xyloglucan:xyloglucosyl transferase [EC:2.4.1.207]	GO:0005576//extracellular region;GO:0030312//external encapsulating structure	GO:0004553//hydrolase activity, hydrolyzing O-glycosyl compounds;GO:0016758//transferase activity, transferring hexosyl groups	GO:0044042//glucan metabolic process	gi|358248522|ref|NP_001240151.1|/1.79462e-167/uncharacterized protein LOC100796768 precursor [Glycine max]
Glyma08g04560	1629	38	9	2.77241	0.641448	-2.11174	Down	1.06e-05	0.000149379	K13473|1|4e-26|117|osa:4331523|chitin elicitor-binding protein;K13429|3|4e-06|51.6|ath:AT3G21630|chitin elicitor receptor kinase 1	GO:0031225//anchored to membrane	-	-	gi|356527809|ref|XP_003532499.1|/1.05495e-169/PREDICTED: lysM domain-containing GPI-anchored protein 2-like [Glycine max]
Glyma18g49240	2177	3108	742	169.675	39.5717	-2.10023	Down	0	0	K14329|1|6e-45|181|ath:AT5G61160|agmatine coumaroyltransferase [EC:2.3.1.64 2.3.1.-];K13065|3|2e-14|79.7|zma:100194386|shikimate O-hydroxycinnamoyltransferase [EC:2.3.1.133]	-	-	-	gi|356568640|ref|XP_003552518.1|/0/PREDICTED: agmatine coumaroyltransferase-like [Glycine max]
Glyma11g35860	1159	58	14	5.94756	1.40244	-2.08436	Down	5.92e-08	1.29e-06	K10523|1|5e-07|53.9|gmx:100806769|speckle-type POZ protein	-	GO:0005488//binding	GO:0009791//post-embryonic development	gi|356569270|ref|XP_003552826.1|/1.42082e-103/PREDICTED: BTB/POZ domain-containing protein At3g56230-like [Glycine max]
Glyma14g09670	2951	210	51	8.45755	2.00651	-2.07555	Down	4.03e-25	3.78e-23	K08653|1|7e-07|55.1|olu:OSTLU_40456|membrane-bound transcription factor site-1 protease [EC:3.4.21.112]	-	GO:0005515//protein binding;GO:0004175//endopeptidase activity	GO:0019538//protein metabolic process;GO:0044092//negative regulation of molecular function	gi|356552252|ref|XP_003544482.1|/0/PREDICTED: subtilisin-like protease-like [Glycine max]
Glyma04g01280	1138	49	12	5.11739	1.22427	-2.06348	Down	7.7e-07	1.38e-05	-	-	-	-	gi|356508333|ref|XP_003522912.1|/2.60801e-142/PREDICTED: uncharacterized protein LOC100791816 [Glycine max]
Glyma20g37010	3731	137	34	4.36405	1.05802	-2.0443	Down	1.34e-16	7.34e-15	K00924|1|0.0|641|ath:AT1G75820|[EC:2.7.1.-];K08286|5|1e-158|559|ath:AT4G28490|protein-serine/threonine kinase [EC:2.7.11.-]	GO:0031224//intrinsic to membrane	GO:0004871//signal transducer activity;GO:0016491//oxidoreductase activity;GO:0004674//protein serine/threonine kinase activity;GO:0032559	GO:0006464//cellular protein modification process	gi|356574888|ref|XP_003555575.1|/0/PREDICTED: leucine-rich repeat receptor-like protein kinase PXL1-like [Glycine max]
Glyma02g07070	1597	60	15	4.4652	1.0905	-2.03373	Down	5.68e-08	1.24e-06	K08233|1|6e-70|263|ath:AT2G23610|polyneuridine-aldehyde esterase [EC:3.1.1.78]	-	-	-	gi|356498541|ref|XP_003518109.1|/7.17818e-147/PREDICTED: polyneuridine-aldehyde esterase-like [Glycine max]
Glyma10g27940	2162	112	28	6.15682	1.50363	-2.03373	Down	9.62e-14	4.1e-12	K09422|1|0.0|716|gmx:100782199|myb proto-oncogene protein, plant	-	-	-	gi|356534955|ref|XP_003536016.1|/0/PREDICTED: uncharacterized protein LOC100815881 [Glycine max]
Glyma10g00720	2832	36	9	1.51079	0.368968	-2.03373	Down	2.9e-05	0.000364807	-	GO:0031224//intrinsic to membrane	GO:0004871//signal transducer activity	GO:0009267//cellular response to starvation	gi|356502171|ref|XP_003519894.1|/0/PREDICTED: phosphate transporter PHO1-like [Glycine max]
Glyma16g28900	4548	44	11	1.14981	0.28081	-2.03373	Down	3.58e-06	5.56e-05	K05666|1|4e-155|548|olu:OSTLU_35503|ATP-binding cassette, subfamily C (CFTR/MRP), member 2;K05658|2|5e-54|212|gmx:100787093|ATP-binding cassette, subfamily B (MDR/TAP), member 1	GO:0031224//intrinsic to membrane	GO:0017111//nucleoside-triphosphatase activity;GO:0016491//oxidoreductase activity;GO:0015405;GO:0032559	GO:0006810//transport;GO:0009207	gi|356561462|ref|XP_003549000.1|/0/PREDICTED: ABC transporter C family member 10-like [Glycine max]
Glyma11g00540	1894	36	9	2.259	0.551699	-2.03373	Down	2.9e-05	0.000364701	-	-	-	-	gi|356540319|ref|XP_003538637.1|/4.99786e-115/PREDICTED: uncharacterized protein LOC100799187 [Glycine max]
Glyma08g20230	2970	540	136	21.6089	5.31646	-2.02309	Down	4.16e-60	1.3e-57	K15718|1|0.0|1286|mtr:MTR_2g099570|linoleate 9S-lipoxygenase [EC:1.13.11.58]	GO:0044424//intracellular part	GO:0046914//transition metal ion binding;GO:0016702//oxidoreductase activity, acting on single donors with incorporation of molecular oxygen, incorporation of two atoms of oxygen	GO:0006633//fatty acid biosynthetic process	gi|351725145|ref|NP_001237338.1|/0/lipoxygenase-10 [Glycine max]
Glyma10g03300	1156	67	17	6.88829	1.70738	-2.01236	Down	1.18e-08	2.83e-07	-	-	-	-	gi|357440711|ref|XP_003590633.1|/3.10155e-58/Ethylene receptor [Medicago truncatula]
Glyma10g41281	1929	63	16	3.88153	0.963003	-2.01101	Down	3.31e-08	7.48e-07	-	-	-	-	gi|356534323|ref|XP_003535706.1|/0/PREDICTED: uncharacterized protein LOC100815528 [Glycine max]
Glyma07g17620	2682	35	9	1.55097	0.389604	-1.99309	Down	4.75e-05	0.000565938	K15336|1|5e-65|248|vvi:100259391|tRNA (cytosine38-C5)-methyltransferase [EC:2.1.1.204]	-	-	-	gi|356520989|ref|XP_003529141.1|/0/PREDICTED: pentatricopeptide repeat-containing protein At3g09060-like [Glycine max]
Glyma06g48260	2504	1853	478	87.9499	22.1632	-1.98851	Down	2.41e-197	8.01e-194	K10999|1|3e-99|361|pop:POPTR_819877|cellulose synthase A [EC:2.4.1.12]	-	-	-	gi|356515422|ref|XP_003526399.1|/0/PREDICTED: cellulose synthase-like protein G1-like [Glycine max]
Glyma16g32740	1012	54	14	6.34173	1.60615	-1.98127	Down	4.24e-07	8.01e-06	-	GO:0031224//intrinsic to membrane;GO:0031090//organelle membrane	-	-	gi|351721024|ref|NP_001235916.1|/4.62881e-100/uncharacterized protein LOC100499779 precursor [Glycine max]
Glyma03g27120	1478	42	11	3.3773	0.864088	-1.96662	Down	9.54e-06	0.000135348	-	-	-	-	gi|356503305|ref|XP_003520451.1|/0/PREDICTED: auxin-induced protein 5NG4-like [Glycine max]
Glyma05g35295	1771	61	16	4.0936	1.04892	-1.96447	Down	8.72e-08	1.85e-06	K07213|1|3e-09|61.6|vcn:VOLCADRAFT_82965|copper chaperone	GO:0031410//cytoplasmic vesicle;GO:0031410//cytoplasmic vesicle;GO:0031410//cytoplasmic vesicle	GO:0043169//cation binding;GO:0043169//cation binding;GO:0043169//cation binding	GO:0000041//transition metal ion transport;GO:0000041//transition metal ion transport;GO:0000041//transition metal ion transport	gi|356513125|ref|XP_003525264.1|/1.64614e-71/PREDICTED: uncharacterized protein LOC100816650 [Glycine max]
Glyma02g11711	2133	239	63	13.3168	3.42917	-1.95732	Down	2.13e-26	2.13e-24	K13496|1|5e-101|367|ath:AT2G36780|UDP-glucosyl transferase 73C [EC:2.4.1.-]	-	GO:0016758//transferase activity, transferring hexosyl groups;GO:0016758//transferase activity, transferring hexosyl groups	-	gi|356499781|ref|XP_003518715.1|/0/PREDICTED: UDP-glycosyltransferase 73B3-like [Glycine max]
Glyma07g03100	1246	52	14	4.95998	1.30452	-1.92682	Down	1.11e-06	1.92e-05	-	-	-	-	gi|358248289|ref|NP_001240111.1|/3.10611e-75/uncharacterized protein LOC100804953 [Glycine max]
Glyma20g35980	3154	48	13	1.80873	0.478543	-1.91826	Down	3.13e-06	4.91e-05	-	GO:0016020//membrane;GO:0016020//membrane	GO:0015197//peptide transporter activity;GO:0015603;GO:0015197//peptide transporter activity;GO:0015603	GO:0022414//reproductive process;GO:0006810//transport;GO:0009791//post-embryonic development;GO:0010038//response to metal ion;GO:0022414//reproductive process;GO:0006810//transport;GO:0009791//post-embryonic development;GO:0010038//response to metal ion	gi|356576618|ref|XP_003556427.1|/0/PREDICTED: metal-nicotianamine transporter YSL1-like [Glycine max]
Glyma08g42450	1634	59	16	4.29135	1.13686	-1.91638	Down	2.27e-07	4.52e-06	K13065|1|2e-72|271|vvi:100265530|shikimate O-hydroxycinnamoyltransferase [EC:2.3.1.133]	-	-	-	gi|356527018|ref|XP_003532111.1|/0/PREDICTED: hydroxycinnamoyl-Coenzyme A shikimate/quinate hydroxycinnamoyltransferase-like [Glycine max]
Glyma09g05390	1776	77	21	5.15279	1.37283	-1.9082	Down	3.48e-09	8.98e-08	K00517|1|3e-138|490|ath:AT4G37340|[EC:1.14.-.-]	-	GO:0005506//iron ion binding;GO:0004497//monooxygenase activity	GO:0008152//metabolic process	gi|356532599|ref|XP_003534859.1|/0/PREDICTED: isoflavone 2'-hydroxylase-like [Glycine max]
Glyma09g27490	1812	51	14	3.34508	0.897035	-1.8988	Down	1.79e-06	2.96e-05	K05282|1|0.0|656|gmx:100816992|gibberellin 20-oxidase [EC:1.14.11.12]	-	GO:0046914//transition metal ion binding;GO:0016706//oxidoreductase activity, acting on paired donors, with incorporation or reduction of molecular oxygen, 2-oxoglutarate as one donor, and incorporation of one atom each of oxygen into both donors	GO:0008152//metabolic process	gi|2262201|gb|AAC49756.1|/0/gibberellin 20-oxidase [Phaseolus vulgaris]
Glyma15g23400	2496	51	14	2.4284	0.651213	-1.8988	Down	1.79e-06	2.96e-05	K12123|1|0.0|1188|rcu:RCOM_0634650|phytochrome E;K12121|3|0.0|1021|vvi:100261882|phytochrome B	GO:0044464//cell part	GO:0004673//protein histidine kinase activity;GO:0004930//G-protein coupled receptor activity;GO:0042802//identical protein binding;GO:0032559	GO:0006468//protein phosphorylation;GO:0007602//phototransduction;GO:0006351//transcription, DNA-dependent	gi|356556523|ref|XP_003546574.1|/0/PREDICTED: phytochrome E-like [Glycine max]
Glyma11g20090	2241	36	10	1.90922	0.518081	-1.88173	Down	7.11e-05	0.00080834	K02575|1|0.0|826|rcu:RCOM_1355110|MFS transporter, NNP family, nitrate/nitrite transporter	-	-	GO:0006810//transport	gi|356541463|ref|XP_003539195.1|/0/PREDICTED: high affinity nitrate transporter 2.4-like [Glycine max]
Glyma07g36805	599	43	12	8.53171	2.32592	-1.87504	Down	1.42e-05	0.000193925	-	-	-	-	-
Glyma18g39960	1367	93	26	8.08554	2.20823	-1.87245	Down	1.39e-10	4.26e-09	K07025|1|1e-145|514|gmx:100796466|putative hydrolase of the HAD superfamily	-	GO:0003824//catalytic activity	-	gi|356567951|ref|XP_003552178.1|/2.00952e-171/PREDICTED: uncharacterized protein LOC100777400 [Glycine max]
Glyma08g28770	2147	96	27	5.31415	1.46006	-1.86381	Down	8.04e-11	2.53e-09	-	-	-	-	gi|356526613|ref|XP_003531911.1|/4.07842e-127/PREDICTED: uncharacterized protein LOC100804073 [Glycine max]
Glyma0466s00200	969	39	11	4.78338	1.31798	-1.8597	Down	4.02e-05	0.000487565	-	-	GO:0016787//hydrolase activity	GO:0044238//primary metabolic process	gi|363814595|ref|NP_001242371.1|/5.98807e-110/uncharacterized protein LOC100792188 [Glycine max]
Glyma04g36760	2244	109	31	5.77295	1.6039	-1.84772	Down	5.61e-12	2.03e-10	K06901|1|0.0|683|rcu:RCOM_1507420|putative MFS transporter, AGZA family, xanthine/uracil permease	GO:0044464//cell part	GO:0015205//nucleobase transmembrane transporter activity	GO:0006863//purine nucleobase transport	gi|356507331|ref|XP_003522421.1|/0/PREDICTED: adenine/guanine permease AZG2-like [Glycine max]
Glyma08g07950	2949	806	230	32.4829	9.05509	-1.84288	Down	1.28e-78	6.66e-76	K15920|1|0.0|1476|gmx:100786744|beta-D-xylosidase 4 [EC:3.2.1.37]	GO:0031012//extracellular matrix;GO:0030312//external encapsulating structure	GO:0015926//glucosidase activity	GO:0000272//polysaccharide catabolic process	gi|356524862|ref|XP_003531047.1|/0/PREDICTED: beta-xylosidase/alpha-L-arabinofuranosidase 2-like [Glycine max]
Glyma14g01110	838	56	16	7.94216	2.21674	-1.84109	Down	9.32e-07	1.64e-05	-	-	-	-	gi|388499126|gb|AFK37629.1|/2.9683e-27/unknown [Lotus japonicus]
Glyma13g17670	3052	83	24	3.23212	0.912991	-1.82381	Down	2.68e-09	6.98e-08	-	GO:0031224//intrinsic to membrane;GO:0031224//intrinsic to membrane	GO:0015299//solute:hydrogen antiporter activity;GO:0015299//solute:hydrogen antiporter activity	GO:0006811//ion transport;GO:0006811//ion transport	gi|356548002|ref|XP_003542393.1|/0/PREDICTED: cation/H(+) antiporter 19-like [Glycine max]
Glyma09g03270	2197	38	11	2.05564	0.581303	-1.82223	Down	6.43e-05	0.000740477	-	-	GO:0016491//oxidoreductase activity;GO:0050662//coenzyme binding	GO:0008152//metabolic process	gi|356532461|ref|XP_003534791.1|/0/PREDICTED: reticuline oxidase-like protein-like [Glycine max]
Glyma05g14820	1908	38	11	2.36701	0.669351	-1.82223	Down	6.43e-05	0.00074028	-	-	-	-	gi|356514119|ref|XP_003525754.1|/0/PREDICTED: UPF0481 protein At3g47200-like [Glycine max]
Glyma14g01520	3855	162	47	4.99442	1.41551	-1.81899	Down	8.72e-17	4.84e-15	K00924|1|2e-152|538|aly:ARALYDRAFT_473063|[EC:2.7.1.-];K13420|2|3e-151|535|sbi:SORBI_06g028760|LRR receptor-like serine/threonine-protein kinase FLS2 [EC:2.7.11.1]	GO:0031224//intrinsic to membrane	GO:0016491//oxidoreductase activity;GO:0004672//protein kinase activity;GO:0032559	GO:0006464//cellular protein modification process;GO:0007167//enzyme linked receptor protein signaling pathway	gi|356553486|ref|XP_003545087.1|/0/PREDICTED: probable LRR receptor-like serine/threonine-protein kinase At4g26540-like [Glycine max]
Glyma03g29330	4602	237	69	6.12063	1.74077	-1.81395	Down	8.75e-24	7.4e-22	K03403|1|0.0|2554|gmx:100806079|magnesium chelatase subunit H [EC:6.6.1.1]	-	GO:0051003	GO:0006779//porphyrin-containing compound biosynthetic process	gi|351726696|ref|NP_001237903.1|/0/magnesium chelatase subunit [Glycine max]
Glyma16g30000	2398	41	12	2.03203	0.580994	-1.80632	Down	3.63e-05	0.000445973	K14430|1|1e-05|50.8|cme:CMP026C|phosphate transporter	GO:0031224//intrinsic to membrane;GO:0031224//intrinsic to membrane	GO:0015142//tricarboxylic acid transmembrane transporter activity;GO:0015142//tricarboxylic acid transmembrane transporter activity	GO:0006842//tricarboxylic acid transport;GO:0006842//tricarboxylic acid transport	gi|356559770|ref|XP_003548170.1|/0/PREDICTED: putative transporter arsB-like [Glycine max]
Glyma09g31040	1519	41	12	3.2079	0.917198	-1.80632	Down	3.63e-05	0.00044572	-	GO:0031410//cytoplasmic vesicle	-	-	gi|356529543|ref|XP_003533350.1|/1.39974e-168/PREDICTED: auxin-induced protein 5NG4-like [Glycine max]
Glyma17g06660	2833	41	12	1.72001	0.491784	-1.80632	Down	3.63e-05	0.000445847	K12127|1|8e-09|61.2|ath:AT5G61380|pseudo-response regulator 1;K12128|3|5e-08|58.5|aly:ARALYDRAFT_483843|pseudo-response regulator 9	-	-	-	gi|356562078|ref|XP_003549301.1|/0/PREDICTED: protein CHLOROPLAST IMPORT APPARATUS 2-like [Glycine max]
Glyma16g05710	2642	51	15	2.2942	0.659171	-1.79927	Down	4.14e-06	6.36e-05	K07195|1|0.0|783|mtr:MTR_7g026630|exocyst complex component 7	GO:0044444//cytoplasmic part;GO:0043231//intracellular membrane-bounded organelle	-	GO:0006887//exocytosis	gi|356560460|ref|XP_003548510.1|/0/PREDICTED: uncharacterized protein LOC100807802 [Glycine max]
Glyma03g16310	1591	40	12	2.98802	0.875691	-1.7707	Down	5.75e-05	0.000672128	K13030|1|3e-63|241|sbi:SORBI_01g001220|cyanohydrin beta-glucosyltransferase [EC:2.4.1.85];K13493|2|7e-55|213|ath:AT5G05870|cytokinin-N-glucosyltransferase [EC:2.4.1.-];K12356|4|3e-48|191|pop:POPTR_563103|coniferyl-alcohol glucosyltransferase [EC:2.4.1.111];K13691|5|4e-48|191|pop:POPTR_807713|pathogen-inducible salicylic acid glucosyltransferase [EC:2.4.1.-]	-	-	-	gi|356506832|ref|XP_003522179.1|/0/PREDICTED: UDP-glycosyltransferase 85A7-like [Glycine max]
Glyma14g03300	3961	100	30	3.00047	0.879339	-1.7707	Down	1.5e-10	4.56e-09	K00696|1|0.0|1995|gmx:100806543|sucrose-phosphate synthase [EC:2.4.1.14]	-	GO:0035251//UDP-glucosyltransferase activity	GO:0005984//disaccharide metabolic process	gi|356553609|ref|XP_003545147.1|/0/PREDICTED: probable sucrose-phosphate synthase 2-like [Glycine max]
Glyma02g38650	2934	50	15	2.02537	0.593569	-1.7707	Down	6.54e-06	9.64e-05	K00924|1|5e-28|125|aly:ARALYDRAFT_485972|[EC:2.7.1.-];K04733|3|3e-27|122|pop:POPTR_878434|interleukin-1 receptor-associated kinase 4 [EC:2.7.11.1];K05658|5|4e-27|122|vvi:100262734|ATP-binding cassette, subfamily B (MDR/TAP), member 1	-	GO:0016301//kinase activity;GO:0000166//nucleotide binding	-	gi|356500819|ref|XP_003519228.1|/0/PREDICTED: probable L-type lectin-domain containing receptor kinase S.7-like [Glycine max]
Glyma08g02690	2098	73	22	4.13535	1.21747	-1.76413	Down	5.06e-08	1.12e-06	K01784|1|1e-166|585|gmx:100809394|UDP-glucose 4-epimerase [EC:5.1.3.2]	GO:0044444//cytoplasmic part;GO:0044444//cytoplasmic part	GO:0005515//protein binding;GO:0016857//racemase and epimerase activity, acting on carbohydrates and derivatives;GO:0048037//cofactor binding;GO:0005515//protein binding;GO:0016857//racemase and epimerase activity, acting on carbohydrates and derivatives;GO:0048037//cofactor binding	GO:0019318//hexose metabolic process;GO:0019318//hexose metabolic process	gi|356523539|ref|XP_003530395.1|/0/PREDICTED: UDP-glucose 4-epimerase GEPI48-like [Glycine max]
Glyma09g24530	1315	53	16	4.7901	1.41265	-1.76165	Down	3.7e-06	5.75e-05	K15746|1|4e-148|522|gmx:100813368|beta-carotene 3-hydroxylase [EC:1.14.13.129]	GO:0016020//membrane	-	GO:0008152//metabolic process	gi|358248752|ref|NP_001239934.1|/5.58154e-147/beta-carotene hydroxylase 2, chloroplastic-like [Glycine max]
Glyma01g35160	1500	447	135	35.4169	10.4492	-1.76105	Down	9e-42	1.63e-39	K11426|1|3e-47|187|osa:4344924|SET and MYND domain-containing protein	-	-	-	gi|255644430|gb|ACU22720.1|/0/unknown [Glycine max]
Glyma10g26380	1271	46	14	4.30137	1.27886	-1.74994	Down	1.83e-05	0.000242884	-	-	-	-	gi|356575194|ref|XP_003555727.1|/7.35114e-88/PREDICTED: uncharacterized protein LOC100815580 [Glycine max]
Glyma03g31210	2148	72	22	3.98375	1.18913	-1.74423	Down	7.93e-08	1.69e-06	-	-	-	-	gi|356504939|ref|XP_003521250.1|/4.63116e-155/PREDICTED: uncharacterized protein LOC100800416 [Glycine max]
Glyma07g09760	1481	49	15	3.9322	1.17591	-1.74155	Down	1.03e-05	0.000145493	K07213|1|6e-10|63.5|mtr:MTR_1g092670|copper chaperone	GO:0044464//cell part	GO:0043169//cation binding;GO:0043169//cation binding	GO:0000041//transition metal ion transport;GO:0000041//transition metal ion transport	gi|356520571|ref|XP_003528935.1|/7.67829e-47/PREDICTED: uncharacterized protein LOC100795735 [Glycine max]
Glyma08g05490	2182	202	62	11.0025	3.29896	-1.73775	Down	2.13e-19	1.39e-17	-	-	GO:0016740//transferase activity	-	gi|356527872|ref|XP_003532530.1|/0/PREDICTED: uncharacterized glycosyltransferase AGO61-like [Glycine max]
Glyma03g21540	1881	81	25	5.11789	1.54309	-1.72973	Down	1.47e-08	3.47e-07	K01495|1|8e-176|615|mtr:MTR_7g055700|GTP cyclohydrolase I [EC:3.5.4.16]	-	GO:0016787//hydrolase activity	GO:0008152//metabolic process	gi|356504404|ref|XP_003520986.1|/0/PREDICTED: uncharacterized protein LOC100792313 [Glycine max]
Glyma08g44720	1407	181	57	15.289	4.70349	-1.70069	Down	4.67e-17	2.64e-15	K08237|1|6e-122|436|pop:POPTR_731288|hydroquinone glucosyltransferase [EC:2.4.1.218]	-	-	-	gi|356524403|ref|XP_003530818.1|/0/PREDICTED: hydroquinone glucosyltransferase-like [Glycine max]
Glyma13g30870	1519	88	28	6.88524	2.14013	-1.68581	Down	6.58e-09	1.63e-07	K09510|1|2e-125|447|rcu:RCOM_1673240|DnaJ homolog subfamily B member 4	-	GO:0005515//protein binding	GO:0044267//cellular protein metabolic process	gi|363808188|ref|NP_001241973.1|/3.55127e-180/uncharacterized protein LOC100794650 [Glycine max]
Glyma09g37030	1492	47	15	3.74389	1.16725	-1.68143	Down	2.52e-05	0.000322862	-	-	-	-	-
Glyma12g36200	1691	53	17	3.725	1.1672	-1.67419	Down	8.01e-06	0.000116309	-	-	-	-	gi|356544128|ref|XP_003540507.1|/0/PREDICTED: uncharacterized protein LOC100817531 [Glycine max]
Glyma14g23702	570	106	34	22.1017	6.92538	-1.67419	Down	2.27e-10	6.74e-09	K03040|1|2e-30|130|gmx:3989329|DNA-directed RNA polymerase subunit alpha [EC:2.7.7.6]	GO:0009536//plastid	GO:0034062//RNA polymerase activity;GO:0003676//nucleic acid binding;GO:0005515//protein binding	GO:0010467//gene expression	gi|449533832|ref|XP_004173875.1|/2.15997e-50/PREDICTED: DNA-directed RNA polymerase subunit alpha-like [Cucumis sativus]
Glyma07g12090	2088	62	20	3.52903	1.11209	-1.666	Down	1.45e-06	2.44e-05	K01099|1|7e-51|200|ota:Ot04g02290|phosphatidylinositol-bisphosphatase [EC:3.1.3.36]	-	-	-	gi|356522912|ref|XP_003530086.1|/0/PREDICTED: type I inositol-1,4,5-trisphosphate 5-phosphatase CVP2-like [Glycine max]
Glyma14g34330	1093	43	14	4.67566	1.48713	-1.65264	Down	6.98e-05	0.000795492	-	-	-	-	gi|351720923|ref|NP_001238472.1|/3.60221e-69/uncharacterized protein LOC100527853 [Glycine max]
Glyma02g28962	1794	46	15	3.0474	0.970753	-1.6504	Down	3.92e-05	0.000477424	-	-	-	-	gi|356504870|ref|XP_003521217.1|/1.4497e-66/PREDICTED: uncharacterized protein LOC100781689 [Glycine max]
Glyma14g06790	1704	55	18	3.83608	1.22643	-1.64517	Down	7.01e-06	0.000102694	-	-	-	-	gi|356551538|ref|XP_003544131.1|/1.43163e-121/PREDICTED: uncharacterized protein At2g39920-like [Glycine max]
Glyma02g09801	2483	58	19	2.77617	0.888416	-1.64379	Down	3.96e-06	6.1e-05	-	-	-	-	gi|356502420|ref|XP_003520017.1|/0/PREDICTED: protein PLASTID MOVEMENT IMPAIRED 2-like [Glycine max]
Glyma03g31620	606	61	20	11.9633	3.83175	-1.64254	Down	2.24e-06	3.63e-05	-	-	-	-	gi|356503578|ref|XP_003520584.1|/1.44147e-52/PREDICTED: PRA1 family protein F2-like [Glycine max]
Glyma12g32390	1487	189	62	15.1059	4.84084	-1.64178	Down	5.95e-17	3.33e-15	K08235|1|5e-163|572|gmx:100801567|xyloglucan:xyloglucosyl transferase [EC:2.4.1.207]	GO:0005576//extracellular region;GO:0030312//external encapsulating structure	GO:0016798//hydrolase activity, acting on glycosyl bonds;GO:0016758//transferase activity, transferring hexosyl groups	GO:0044042//glucan metabolic process	gi|356543758|ref|XP_003540327.1|/7.6984e-172/PREDICTED: xyloglucan endotransglucosylase/hydrolase protein 9 [Glycine max]
Glyma07g38460	1786	648	214	43.1209	13.9114	-1.63212	Down	7.33e-54	1.78e-51	K13496|1|2e-94|344|ath:AT2G36770|UDP-glucosyl transferase 73C [EC:2.4.1.-]	-	GO:0016757//transferase activity, transferring glycosyl groups	-	gi|395343020|dbj|BAM29362.1|/0/UDP-glucosyltransferase UGT73F2 [Glycine max]
Glyma03g30600	1522	48	16	3.74818	1.22052	-1.6187	Down	3.41e-05	0.000422128	-	-	GO:0004518//nuclease activity	-	gi|356503513|ref|XP_003520552.1|/0/PREDICTED: uncharacterized protein LOC100794761 [Glycine max]
Glyma14g19010	2283	243	81	12.6501	4.11926	-1.6187	Down	5.71e-21	4.13e-19	K14638|1|2e-94|345|mtr:MTR_4g015080|solute carrier family 15 (peptide/histidine transporter), member 3/4	GO:0044464//cell part;GO:0044464//cell part	-	GO:0015833//peptide transport;GO:0006810//transport	gi|356554462|ref|XP_003545565.1|/0/PREDICTED: probable peptide transporter At1g52190-like [Glycine max]
Glyma06g18620	1875	78	26	4.94411	1.60995	-1.6187	Down	1.15e-07	2.38e-06	-	-	GO:0016787//hydrolase activity;GO:0016787//hydrolase activity	-	gi|356518942|ref|XP_003528134.1|/6.35589e-163/PREDICTED: uncharacterized protein LOC100816323 [Glycine max]
Glyma08g04263	3019	57	19	2.24391	0.730685	-1.6187	Down	6.1e-06	9.03e-05	K15336|1|2e-46|186|vvi:100259391|tRNA (cytosine38-C5)-methyltransferase [EC:2.1.1.204]	-	GO:0016301//kinase activity;GO:0016301//kinase activity;GO:0016301//kinase activity;GO:0016301//kinase activity;GO:0016301//kinase activity;GO:0016301//kinase activity	-	gi|356513139|ref|XP_003525271.1|/0/PREDICTED: pentatricopeptide repeat-containing protein At5g21222-like [Glycine max]
Glyma04g08100	4499	81	27	2.13975	0.696767	-1.6187	Down	6.51e-08	1.41e-06	K13680|1|4e-115|415|smo:SELMODRAFT_230176|beta-mannan synthase [EC:2.4.1.32]	GO:0043231//intracellular membrane-bounded organelle	GO:0046527//glucosyltransferase activity	-	gi|356507837|ref|XP_003522670.1|/0/PREDICTED: probable xyloglucan glycosyltransferase 5-like [Glycine max]
Glyma01g40620	2026	48	16	2.81576	0.916896	-1.6187	Down	3.41e-05	0.000422007	K13422|1|4e-10|65.1|osa:4349484|transcription factor MYC2	-	-	-	gi|356495529|ref|XP_003516629.1|/2.79108e-154/PREDICTED: LOW QUALITY PROTEIN: transcription factor bHLH25-like [Glycine max]
Glyma19g05760	1606	288	97	21.3128	7.01239	-1.60375	Down	2.91e-24	2.54e-22	-	-	-	-	gi|356573657|ref|XP_003554974.1|/0/PREDICTED: uncharacterized protein LOC100817694 [Glycine max]
Glyma20g26510	3183	71	24	2.65104	0.875416	-1.59852	Down	5.44e-07	1.01e-05	K13420|1|2e-37|156|ath:AT5G46330|LRR receptor-like serine/threonine-protein kinase FLS2 [EC:2.7.11.1]	GO:0044464//cell part	GO:0004672//protein kinase activity	GO:0009987//cellular process;GO:0008152//metabolic process	gi|356574280|ref|XP_003555277.1|/0/PREDICTED: receptor protein kinase-like protein At4g34220-like [Glycine max]
Glyma19g32630	1682	127	43	8.97371	2.96812	-1.59615	Down	1.92e-11	6.51e-10	K13261|1|2e-108|391|gmx:100776878|cytochrome P450, family 93, subfamily A, polypeptide 1 (3,9-dihydroxypterocarpan 6a-monooxygenase) [EC:1.14.13.28];K00517|2|5e-101|366|ath:AT4G15350|[EC:1.14.-.-];K15814|3|3e-98|357|gmx:100037459|beta-amyrin 24-hydroxylase [EC:1.14.99.43];K09755|5|5e-89|327|rcu:RCOM_0193830|ferulate-5-hydroxylase [EC:1.14.-.-]	-	GO:0016709//oxidoreductase activity, acting on paired donors, with incorporation or reduction of molecular oxygen, NAD(P)H as one donor, and incorporation of one atom of oxygen;GO:0005506//iron ion binding	-	gi|356570506|ref|XP_003553426.1|/0/PREDICTED: LOW QUALITY PROTEIN: cytochrome P450 93A1-like [Glycine max]
Glyma02g09941	2789	109	37	4.64486	1.54026	-1.59246	Down	5.5e-10	1.55e-08	K03327|1|0.0|940|gmx:100776126|multidrug resistance protein, MATE family	GO:0044464//cell part;GO:0044464//cell part;GO:0044464//cell part;GO:0044464//cell part	GO:0015291//secondary active transmembrane transporter activity;GO:0015291//secondary active transmembrane transporter activity;GO:0015291//secondary active transmembrane transporter activity;GO:0015291//secondary active transmembrane transporter activity	GO:0015893//drug transport;GO:0015893//drug transport;GO:0015893//drug transport;GO:0015893//drug transport	gi|356499620|ref|XP_003518635.1|/0/PREDICTED: MATE efflux family protein DTX1-like isoform 1 [Glycine max]
Glyma16g08370	2256	135	46	7.11196	2.36733	-1.58699	Down	5.47e-12	1.98e-10	K05681|1|2e-77|289|cme:CMS467C|ATP-binding cassette, subfamily G (WHITE), member 2;K12843|2|3e-59|228|vvi:100248403|U4/U6 small nuclear ribonucleoprotein PRP3;K05663|4|1e-14|80.5|rcu:RCOM_0261010|mitochondrial ABC transporter ATM	GO:0044464//cell part	GO:0017111//nucleoside-triphosphatase activity;GO:0015604//organic phosphonate transmembrane transporter activity;GO:0032559	GO:0009207	gi|356558898|ref|XP_003547739.1|/0/PREDICTED: ABC transporter G family member 14-like [Glycine max]
Glyma20g01820	1338	120	41	10.6591	3.55768	-1.58307	Down	8.91e-11	2.79e-09	K09645|1|0.0|711|gmx:100777834|vitellogenic carboxypeptidase-like protein [EC:3.4.16.-]	GO:0043231//intracellular membrane-bounded organelle	GO:0004180//carboxypeptidase activity	GO:0019538//protein metabolic process	gi|356519764|ref|XP_003528539.1|/0/PREDICTED: serine carboxypeptidase-like 50-like [Glycine max]
Glyma11g35710	3123	87	30	3.31087	1.11529	-1.56979	Down	4.26e-08	9.54e-07	K13415|1|1e-71|270|osa:4324691|protein brassinosteroid insensitive 1 [EC:2.7.10.1 2.7.11.1]	GO:0031224//intrinsic to membrane	GO:0004871//signal transducer activity;GO:0016301//kinase activity;GO:0032559	GO:0006464//cellular protein modification process	gi|239500659|dbj|BAH70328.1|/0/receptor-like kinase [Glycine max]
Glyma20g02500	2617	214	74	9.71862	3.28298	-1.56575	Down	7.69e-18	4.58e-16	-	-	-	-	gi|356576393|ref|XP_003556316.1|/0/PREDICTED: uncharacterized protein LOC100816119 isoform 1 [Glycine max]
Glyma16g28080	4456	1549	536	41.3143	13.9656	-1.56477	Down	7.32e-119	7.37e-116	K10999|1|0.0|1795|gmx:100806786|cellulose synthase A [EC:2.4.1.12]	GO:0031224//intrinsic to membrane;GO:0031224//intrinsic to membrane	GO:0016759//cellulose synthase activity;GO:0046914//transition metal ion binding;GO:0016759//cellulose synthase activity;GO:0046914//transition metal ion binding	GO:0045229//external encapsulating structure organization;GO:0009250//glucan biosynthetic process;GO:0045229//external encapsulating structure organization;GO:0009250//glucan biosynthetic process	gi|356559631|ref|XP_003548102.1|/0/PREDICTED: cellulose synthase A catalytic subunit 6 [UDP-forming]-like [Glycine max]
Glyma14g35020	3187	150	52	5.59376	1.89435	-1.56211	Down	6.72e-13	2.68e-11	K12118|1|0.0|1110|pop:POPTR_830225|cryptochrome 1	-	GO:0016830//carbon-carbon lyase activity	GO:0006259//DNA metabolic process	gi|359807220|ref|NP_001240855.1|/0/cryptochrome-1-like [Glycine max]
Glyma02g31460	1262	69	24	6.49807	2.20796	-1.5573	Down	1.26e-06	2.16e-05	K08818|1|1e-09|62.8|vvi:100246062|cell division cycle 2-like [EC:2.7.11.22]	-	-	-	gi|356500495|ref|XP_003519067.1|/1.3628e-110/PREDICTED: uncharacterized protein LOC100784687 [Glycine max]
Glyma19g39810	4920	248	87	5.99075	2.05302	-1.54499	Down	4.52e-20	3.09e-18	K05666|1|0.0|662|olu:OSTLU_35503|ATP-binding cassette, subfamily C (CFTR/MRP), member 2;K05658|2|1e-65|250|sbi:SORBI_03g011860|ATP-binding cassette, subfamily B (MDR/TAP), member 1	GO:0031224//intrinsic to membrane	GO:0017111//nucleoside-triphosphatase activity;GO:0016628//oxidoreductase activity, acting on the CH-CH group of donors, NAD or NADP as acceptor;GO:0015405;GO:0032559	GO:0009207;GO:0006865//amino acid transport	gi|356570960|ref|XP_003553650.1|/0/PREDICTED: ABC transporter C family member 4-like [Glycine max]
Glyma08g05383	2217	74	26	3.96698	1.36159	-1.54275	Down	6.18e-07	1.13e-05	-	-	-	-	gi|356527865|ref|XP_003532527.1|/0/PREDICTED: uncharacterized protein LOC100789428 [Glycine max]
Glyma16g16290	1522	116	41	9.05811	3.12758	-1.53416	Down	4.67e-10	1.33e-08	K01376|1|2e-127|454|aly:ARALYDRAFT_473866|[EC:3.4.22.-];K01365|4|2e-115|414|smo:SELMODRAFT_184826|cathepsin L [EC:3.4.22.15]	-	GO:0016628//oxidoreductase activity, acting on the CH-CH group of donors, NAD or NADP as acceptor;GO:0004175//endopeptidase activity	GO:0019538//protein metabolic process	gi|356559055|ref|XP_003547817.1|/0/PREDICTED: cysteine proteinase RD21a [Glycine max]
Glyma15g39090	2324	305	108	15.5976	5.39545	-1.53151	Down	4.85e-24	4.16e-22	K15639|1|1e-51|140|ath:AT2G26710|cytochrome P450, family 734, subfamily A, polypeptide 1 (PHYB activation tagged suppressor 1) [EC:1.14.-.-]	-	GO:0016491//oxidoreductase activity;GO:0005506//iron ion binding;GO:0016491//oxidoreductase activity;GO:0005506//iron ion binding	GO:0008152//metabolic process	gi|85001703|gb|ABC68405.1|/0/cytochrome P450 monooxygenase CYP72A68 [Glycine max]
Glyma20g23400	1763	262	93	17.6621	6.1245	-1.528	Down	8.38e-21	5.98e-19	K00924|1|2e-26|119|aly:ARALYDRAFT_489138|[EC:2.7.1.-];K08245|3|2e-06|52.4|pop:POPTR_833956|phytepsin [EC:3.4.23.40]	-	GO:0004175//endopeptidase activity	GO:0019538//protein metabolic process	gi|356575389|ref|XP_003555824.1|/0/PREDICTED: aspartic proteinase nepenthesin-1-like [Glycine max]
Glyma05g02280	3621	76	27	2.49448	0.865715	-1.52677	Down	5.31e-07	9.84e-06	K13862|1|1e-20|101|ota:Ot04g03190|solute carrier family 4 (sodium borate transporter), member 11	GO:0031224//intrinsic to membrane;GO:0031224//intrinsic to membrane	GO:0015301//anion:anion antiporter activity;GO:0015103//inorganic anion transmembrane transporter activity;GO:0015301//anion:anion antiporter activity;GO:0015103//inorganic anion transmembrane transporter activity	GO:0006820//anion transport;GO:0010035//response to inorganic substance;GO:0006820//anion transport;GO:0010035//response to inorganic substance	gi|356513461|ref|XP_003525432.1|/0/PREDICTED: probable boron transporter 2-like [Glycine max]
Glyma19g27230	2156	59	21	3.25235	1.13086	-1.52406	Down	1.06e-05	0.000148626	-	-	-	-	gi|356560444|ref|XP_003548502.1|/0/PREDICTED: uncharacterized protein LOC100803541 [Glycine max]
Glyma06g10530	1159	59	21	6.05011	2.10366	-1.52406	Down	1.06e-05	0.000148674	-	GO:0044464//cell part	-	-	gi|351723681|ref|NP_001234984.1|/6.20131e-99/uncharacterized protein LOC100527362 [Glycine max]
Glyma03g29770	755	286	102	45.0208	15.6853	-1.52118	Down	1.98e-22	1.56e-20	-	-	-	-	gi|356504835|ref|XP_003521200.1|/1.53652e-45/PREDICTED: uncharacterized protein LOC100817837 [Glycine max]
Glyma20g22210	2280	67	24	3.49248	1.22213	-1.51486	Down	2.9e-06	4.59e-05	-	GO:0044464//cell part	-	-	gi|356575283|ref|XP_003555771.1|/0/PREDICTED: uncharacterized protein LOC100793403 [Glycine max]
Glyma03g14180	2036	53	19	3.0938	1.08347	-1.51373	Down	3.31e-05	0.000410776	K13508|1|0.0|734|gmx:100808918|glycerol-3-phosphate acyltransferase [EC:2.3.1.15]	-	GO:0016411//acylglycerol O-acyltransferase activity	GO:0006633//fatty acid biosynthetic process;GO:0009791//post-embryonic development	gi|356506768|ref|XP_003522148.1|/0/PREDICTED: LOW QUALITY PROTEIN: glycerol-3-phosphate acyltransferase 6-like [Glycine max]
Glyma06g18560	1993	61	22	3.63762	1.28161	-1.50504	Down	9.03e-06	0.000128781	K00517|1|3e-107|387|ath:AT5G57260|[EC:1.14.-.-]	-	GO:0016491//oxidoreductase activity;GO:0005506//iron ion binding	GO:0008152//metabolic process	gi|356516619|ref|XP_003526991.1|/0/PREDICTED: cytochrome P450 71A1-like [Glycine max]
Glyma14g13070	2323	55	20	2.81389	0.999587	-1.49316	Down	2.82e-05	0.000356666	-	GO:0044464//cell part	-	GO:0051234//establishment of localization	gi|356552472|ref|XP_003544591.1|/0/PREDICTED: uncharacterized protein LOC100805820 [Glycine max]
Glyma02g14880	2132	66	24	3.67918	1.30696	-1.49316	Down	4.37e-06	6.69e-05	K14432|1|0.0|701|gmx:100217340|ABA responsive element binding factor	GO:0043231//intracellular membrane-bounded organelle	GO:0003677//DNA binding;GO:0001071//nucleic acid binding transcription factor activity;GO:0005515//protein binding	GO:0006351//transcription, DNA-dependent	gi|351727254|ref|NP_001238690.1|/0/stress-related protein 1 [Glycine max]
Glyma08g17300	1269	126	46	11.8006	4.20858	-1.48745	Down	2.18e-10	6.47e-09	K00430|1|2e-142|504|mtr:MTR_4g133800|peroxidase [EC:1.11.1.7]	-	GO:0046872//metal ion binding;GO:0003824//catalytic activity	-	gi|356525730|ref|XP_003531476.1|/1.35001e-166/PREDICTED: peroxidase 7-like [Glycine max]
Glyma04g36110	1756	84	31	5.68524	2.04964	-1.47185	Down	2.84e-07	5.55e-06	K09422|1|2e-174|610|gmx:100799243|myb proto-oncogene protein, plant	-	-	-	gi|356516644|ref|XP_003527003.1|/2.96271e-173/PREDICTED: transcription factor MYB86-like [Glycine max]
Glyma11g11190	3292	157	58	5.66806	2.04554	-1.47037	Down	2.06e-12	7.84e-11	K10576|1|5e-48|191|vvi:100250088|ubiquitin-conjugating enzyme E2 H [EC:6.3.2.19];K13415|3|7e-37|154|osa:4324691|protein brassinosteroid insensitive 1 [EC:2.7.10.1 2.7.11.1]	GO:0031224//intrinsic to membrane;GO:0031224//intrinsic to membrane	GO:0004871//signal transducer activity;GO:0004672//protein kinase activity;GO:0016628//oxidoreductase activity, acting on the CH-CH group of donors, NAD or NADP as acceptor;GO:0032559;GO:0004871//signal transducer activity;GO:0004672//protein kinase activity;GO:0016628//oxidoreductase activity, acting on the CH-CH group of donors, NAD or NADP as acceptor;GO:0032559	GO:0006464//cellular protein modification process;GO:0007167//enzyme linked receptor protein signaling pathway;GO:0006464//cellular protein modification process;GO:0007167//enzyme linked receptor protein signaling pathway	gi|356541016|ref|XP_003538980.1|/0/PREDICTED: inactive leucine-rich repeat receptor-like serine/threonine-protein kinase At1g60630-like [Glycine max]
Glyma05g35650	1621	227	84	16.6432	6.01639	-1.46796	Down	2.91e-17	1.67e-15	-	-	-	-	gi|356513155|ref|XP_003525279.1|/2.63077e-67/PREDICTED: uncharacterized protein LOC100779060 isoform 1 [Glycine max]
Glyma05g34220	1513	54	20	4.24179	1.53473	-1.46669	Down	4.24e-05	0.00051113	-	-	-	-	gi|356513016|ref|XP_003525210.1|/7.99823e-124/PREDICTED: uncharacterized protein LOC100788312 [Glycine max]
Glyma11g27720	2260	108	40	5.67949	2.0549	-1.46669	Down	6.15e-09	1.53e-07	K01953|1|0.0|1166|gmx:100798318|asparagine synthase (glutamine-hydrolysing) [EC:6.3.5.4]	-	GO:0016884//carbon-nitrogen ligase activity, with glutamine as amido-N-donor;GO:0032559	GO:0009064//glutamine family amino acid metabolic process;GO:0006528//asparagine metabolic process	gi|356539639|ref|XP_003538303.1|/0/PREDICTED: asparagine synthetase [glutamine-hydrolyzing] 2-like [Glycine max]
Glyma03g38460	3587	89	33	2.94885	1.06813	-1.46507	Down	1.38e-07	2.83e-06	-	GO:0043231//intracellular membrane-bounded organelle;GO:0016020//membrane;GO:0043231//intracellular membrane-bounded organelle;GO:0016020//membrane	GO:0008289//lipid binding;GO:0004721//phosphoprotein phosphatase activity;GO:0008289//lipid binding;GO:0004721//phosphoprotein phosphatase activity	GO:0009933//meristem structural organization;GO:0010073//meristem maintenance;GO:0006351//transcription, DNA-dependent;GO:0009933//meristem structural organization;GO:0010073//meristem maintenance;GO:0006351//transcription, DNA-dependent	gi|356572864|ref|XP_003554585.1|/0/PREDICTED: protein phosphatase 2C 32-like [Glycine max]
Glyma11g05680	2530	1355	505	63.6522	23.1745	-1.45767	Down	5.17e-94	3.61e-91	K13496|1|4e-89|327|ath:AT2G36790|UDP-glucosyl transferase 73C [EC:2.4.1.-]	-	GO:0016757//transferase activity, transferring glycosyl groups	-	gi|356541764|ref|XP_003539343.1|/0/PREDICTED: anthocyanin 3'-O-beta-glucosyltransferase-like [Glycine max]
Glyma04g03090	1752	93	35	6.30875	2.31939	-1.44361	Down	9.99e-08	2.1e-06	K01376|1|3e-104|377|ath:AT5G43060|[EC:3.4.22.-];K01365|3|7e-102|369|smo:SELMODRAFT_183539|cathepsin L [EC:3.4.22.15]	GO:0043231//intracellular membrane-bounded organelle;GO:0031410//cytoplasmic vesicle	GO:0016491//oxidoreductase activity;GO:0070011//peptidase activity, acting on L-amino acid peptides	GO:0008152//metabolic process	gi|356509992|ref|XP_003523725.1|/0/PREDICTED: oryzain alpha chain-like [Glycine max]
Glyma19g32620	420	53	20	14.9976	5.52867	-1.43973	Down	6.35e-05	0.000733606	-	-	-	-	-
Glyma03g27800	2135	1311	495	72.9792	26.9183	-1.4389	Down	2.66e-89	1.67e-86	K14638|1|7e-130|462|mtr:MTR_4g015080|solute carrier family 15 (peptide/histidine transporter), member 3/4	GO:0044464//cell part	-	GO:0015833//peptide transport	gi|356504645|ref|XP_003521106.1|/0/PREDICTED: probable nitrite transporter At1g68570-like [Glycine max]
Glyma18g12180	1811	725	274	47.5789	17.566	-1.43754	Down	4.1e-50	9.2e-48	K13065|1|2e-63|241|vvi:100265530|shikimate O-hydroxycinnamoyltransferase [EC:2.3.1.133]	-	-	-	gi|356567388|ref|XP_003551902.1|/0/PREDICTED: hydroxycinnamoyl-Coenzyme A shikimate/quinate hydroxycinnamoyltransferase-like [Glycine max]
Glyma20g36680	2241	111	42	5.88675	2.17594	-1.43583	Down	6.62e-09	1.64e-07	-	-	-	-	gi|356576690|ref|XP_003556463.1|/0/PREDICTED: trihelix transcription factor GTL2-like [Glycine max]
Glyma02g10770	3606	324	123	10.6786	3.96022	-1.43107	Down	3.77e-23	3.07e-21	K13420|1|2e-106|386|rcu:RCOM_0633880|LRR receptor-like serine/threonine-protein kinase FLS2 [EC:2.7.11.1]	GO:0031224//intrinsic to membrane;GO:0031410//cytoplasmic vesicle	GO:0004672//protein kinase activity;GO:0016491//oxidoreductase activity;GO:0032559	GO:0007167//enzyme linked receptor protein signaling pathway;GO:0006464//cellular protein modification process	gi|356499695|ref|XP_003518672.1|/0/PREDICTED: probably inactive leucine-rich repeat receptor-like protein kinase At3g28040-like [Glycine max]
Glyma17g37570	2038	113	43	6.58975	2.44965	-1.42765	Down	5.62e-09	1.41e-07	-	-	GO:0016741	GO:0006730//one-carbon metabolic process	gi|356564345|ref|XP_003550415.1|/0/PREDICTED: uncharacterized protein LOC100812467 [Glycine max]
Glyma04g35710	3664	412	157	13.364	4.97489	-1.42561	Down	7.49e-29	8.45e-27	K13862|1|8e-12|65.5|ota:Ot04g03190|solute carrier family 4 (sodium borate transporter), member 11	GO:0031224//intrinsic to membrane;GO:0031224//intrinsic to membrane	GO:0015301//anion:anion antiporter activity;GO:0015301//anion:anion antiporter activity	GO:0006811//ion transport;GO:0006811//ion transport	gi|356508679|ref|XP_003523082.1|/0/PREDICTED: probable boron transporter 2-like [Glycine max]
Glyma15g02220	5098	244	93	5.68832	2.11798	-1.42531	Down	1.03e-17	6.1e-16	K05681|1|8e-53|179|cme:CMS467C|ATP-binding cassette, subfamily G (WHITE), member 2;K12843|4|7e-51|156|vvi:100248403|U4/U6 small nuclear ribonucleoprotein PRP3	-	GO:0017111//nucleoside-triphosphatase activity;GO:0017111//nucleoside-triphosphatase activity;GO:0017111//nucleoside-triphosphatase activity;GO:0000166//nucleotide binding	-	gi|356550504|ref|XP_003543626.1|/0/PREDICTED: ABC transporter G family member 36-like isoform 3 [Glycine max]
Glyma10g09990	3725	341	130	10.8798	4.05188	-1.42499	Down	3.88e-24	3.36e-22	K00924|1|1e-142|506|osa:4333912|[EC:2.7.1.-]	GO:0016020//membrane	GO:0004674//protein serine/threonine kinase activity;GO:0000166//nucleotide binding	-	gi|356537188|ref|XP_003537111.1|/0/PREDICTED: probable receptor protein kinase TMK1-like [Glycine max]
Glyma14g24370	2699	73	28	3.21451	1.20447	-1.4162	Down	3.38e-06	5.3e-05	K14994|1|7e-08|58.2|ota:Ot03g05700|solute carrier family 38 (sodium-coupled neutral amino acid transporter), member 7/8;K14209|2|9e-08|57.8|mtr:MTR_4g090380|solute carrier family 36 (proton-coupled amino acid transporter)	GO:0031224//intrinsic to membrane;GO:0031224//intrinsic to membrane	-	GO:0006865//amino acid transport;GO:0006865//amino acid transport	gi|356554636|ref|XP_003545650.1|/0/PREDICTED: amino acid permease 3-like [Glycine max]
Glyma17g14470	2274	91	35	4.75604	1.78697	-1.41224	Down	2.19e-07	4.37e-06	-	-	GO:0005488//binding	-	gi|356565319|ref|XP_003550889.1|/0/PREDICTED: uncharacterized protein LOC100785216 [Glycine max]
Glyma07g30510	1649	244	94	17.5859	6.61831	-1.40988	Down	1.9e-17	1.1e-15	K00826|1|0.0|665|gmx:100778723|branched-chain amino acid aminotransferase [EC:2.6.1.42]	GO:0009536//plastid;GO:0009536//plastid	GO:0004084//branched-chain-amino-acid transaminase activity;GO:0004084//branched-chain-amino-acid transaminase activity	GO:0008152//metabolic process;GO:0008152//metabolic process	gi|356519499|ref|XP_003528410.1|/0/PREDICTED: putative branched-chain-amino-acid aminotransferase 7-like [Glycine max]
Glyma08g10410	2202	88	34	4.74963	1.79267	-1.4057	Down	3.82e-07	7.29e-06	K08150|1|0.0|1061|gmx:100803185|MFS transporter, SP family, solute carrier family 2 (myo-inositol transporter), member 13	GO:0031224//intrinsic to membrane;GO:0042995//cell projection	GO:0005365//myo-inositol transmembrane transporter activity	GO:0015791//polyol transport	gi|356525098|ref|XP_003531164.1|/0/PREDICTED: probable inositol transporter 2-like isoform 1 [Glycine max]
Glyma17g33500	1572	93	36	7.03112	2.65882	-1.40297	Down	1.85e-07	3.74e-06	-	-	-	-	gi|356563952|ref|XP_003550221.1|/6.75178e-73/PREDICTED: uncharacterized protein LOC100795601 [Glycine max]
Glyma06g02290	1622	1929	747	141.343	53.4699	-1.40241	Down	1.31e-125	1.58e-122	K01581|1|0.0|785|gmx:547682|ornithine decarboxylase [EC:4.1.1.17]	-	GO:0016831//carboxy-lyase activity	GO:0006595//polyamine metabolic process	gi|351725883|ref|NP_001236340.1|/0/ornithine decarboxylase [Glycine max]
Glyma15g03380	1584	80	31	6.00246	2.2722	-1.40146	Down	1.38e-06	2.34e-05	-	-	-	-	gi|356557158|ref|XP_003546885.1|/0/PREDICTED: uncharacterized protein LOC100791517 [Glycine max]
Glyma13g37810	2000	54	21	3.20891	1.21907	-1.3963	Down	7.96e-05	0.00089696	K14329|1|2e-58|225|ath:AT5G61160|agmatine coumaroyltransferase [EC:2.3.1.64 2.3.1.-];K13065|3|2e-13|75.9|pop:POPTR_784746|shikimate O-hydroxycinnamoyltransferase [EC:2.3.1.133];K15400|4|2e-12|72.8|ppp:PHYPADRAFT_138784|omega-hydroxypalmitate O-feruloyl transferase [EC:2.3.1.188]	-	GO:0016740//transferase activity	-	gi|356549972|ref|XP_003543364.1|/0/PREDICTED: anthocyanin 5-aromatic acyltransferase-like [Glycine max]
Glyma11g07420	2073	59	23	3.38257	1.28816	-1.39281	Down	3.81e-05	0.000464982	K00423|1|4e-70|264|ppp:PHYPADRAFT_163787|L-ascorbate oxidase [EC:1.10.3.3]	GO:0005576//extracellular region	GO:0046914//transition metal ion binding;GO:0016682//oxidoreductase activity, acting on diphenols and related substances as donors, oxygen as acceptor	GO:0009808//lignin metabolic process	gi|356540767|ref|XP_003538856.1|/0/PREDICTED: laccase-11-like [Glycine max]
Glyma18g04780	3335	174	68	6.2008	2.3673	-1.38921	Down	1.31e-12	5.09e-11	K00924|1|0.0|1197|ath:AT1G66150|[EC:2.7.1.-]	GO:0031224//intrinsic to membrane	GO:0004672//protein kinase activity;GO:0032559	GO:0006464//cellular protein modification process;GO:0023052//signaling	gi|356569387|ref|XP_003552883.1|/0/PREDICTED: probable receptor protein kinase TMK1-like [Glycine max]
Glyma18g16720	1788	1045	409	69.4613	26.558	-1.38706	Down	8.72e-68	3.6e-65	K09510|1|2e-87|322|vvi:100246709|DnaJ homolog subfamily B member 4;K09519|3|3e-68|258|sbi:SORBI_09g002340|DnaJ homolog subfamily B member 13	-	GO:0005488//binding	-	gi|356567574|ref|XP_003551993.1|/2.16622e-155/PREDICTED: dnaJ homolog subfamily B member 1-like [Glycine max]
Glyma09g09430	2195	753	295	40.7713	15.6037	-1.38567	Down	2.9e-49	6.34e-47	K15441|1|4e-06|51.6|gmx:100817106|tRNA-specific adenosine deaminase 2 [EC:3.5.4.-]	-	GO:0016814//hydrolase activity, acting on carbon-nitrogen (but not peptide) bonds, in cyclic amidines;GO:0046914//transition metal ion binding;GO:0016814//hydrolase activity, acting on carbon-nitrogen (but not peptide) bonds, in cyclic amidines;GO:0046914//transition metal ion binding;GO:0003824//catalytic activity;GO:0046914//transition metal ion binding;GO:0003824//catalytic activity;GO:0046914…	-	gi|351721430|ref|NP_001236185.1|/1.31292e-96/uncharacterized protein LOC100305493 [Glycine max]
Glyma16g03760	1839	1015	398	65.5962	25.127	-1.38437	Down	1.06e-65	3.95e-63	K13496|1|4e-82|304|ath:AT2G36770|UDP-glucosyl transferase 73C [EC:2.4.1.-]	-	GO:0016757//transferase activity, transferring glycosyl groups;GO:0016757//transferase activity, transferring glycosyl groups	-	gi|356560761|ref|XP_003548656.1|/0/PREDICTED: UDP-glycosyltransferase 73B5-like [Glycine max]
Glyma15g38670	1831	66	26	4.28401	1.64864	-1.37769	Down	1.53e-05	0.0002079	K13065|1|8e-63|239|vvi:100265530|shikimate O-hydroxycinnamoyltransferase [EC:2.3.1.133]	-	-	-	gi|356567388|ref|XP_003551902.1|/3.53807e-177/PREDICTED: hydroxycinnamoyl-Coenzyme A shikimate/quinate hydroxycinnamoyltransferase-like [Glycine max]
Glyma13g36520	1308	134	53	12.1756	4.70444	-1.3719	Down	7.24e-10	2.02e-08	K13691|1|5e-11|67.4|mtr:MTR_8g088560|pathogen-inducible salicylic acid glucosyltransferase [EC:2.4.1.-]	-	-	-	gi|255647456|gb|ACU24192.1|/0/unknown [Glycine max]
Glyma02g46010	2938	91	36	3.68115	1.42262	-1.3716	Down	4.01e-07	7.6e-06	K11498|1|5e-07|55.5|ath:AT3G10180|centromeric protein E;K13173|2|7e-07|55.1|rcu:RCOM_0123640|arginine and glutamate-rich protein 1	-	-	-	gi|356499392|ref|XP_003518525.1|/0/PREDICTED: uncharacterized protein LOC100799140 [Glycine max]
Glyma10g00460	1990	187	74	11.1682	4.31736	-1.37117	Down	3.3e-13	1.36e-11	-	-	-	-	gi|356536172|ref|XP_003536613.1|/0/PREDICTED: uncharacterized protein LOC100778095 isoform 1 [Glycine max]
Glyma06g07540	4883	88	35	2.14186	0.832187	-1.36388	Down	6.97e-07	1.26e-05	K05681|1|2e-48|194|olu:OSTLU_38326|ATP-binding cassette, subfamily G (WHITE), member 2;K12843|3|2e-48|194|vvi:100248403|U4/U6 small nuclear ribonucleoprotein PRP3	GO:0044464//cell part	GO:0042626//ATPase activity, coupled to transmembrane movement of substances;GO:0015604//organic phosphonate transmembrane transporter activity;GO:0032559	GO:0009207	gi|356515478|ref|XP_003526427.1|/0/PREDICTED: pleiotropic drug resistance protein 1-like [Glycine max]
Glyma06g19290	3703	198	79	6.35486	2.47693	-1.35931	Down	9.78e-14	4.16e-12	K13862|1|8e-18|91.7|ota:Ot04g03190|solute carrier family 4 (sodium borate transporter), member 11	GO:0031224//intrinsic to membrane;GO:0031224//intrinsic to membrane	GO:0015301//anion:anion antiporter activity;GO:0015301//anion:anion antiporter activity	GO:0006811//ion transport;GO:0006811//ion transport	gi|356516668|ref|XP_003527015.1|/0/PREDICTED: probable boron transporter 2-like [Glycine max]
Glyma14g35060	3158	95	38	3.57525	1.39705	-1.35566	Down	2.84e-07	5.56e-06	-	GO:0043231//intracellular membrane-bounded organelle;GO:0043231//intracellular membrane-bounded organelle	-	-	gi|356551697|ref|XP_003544210.1|/0/PREDICTED: uncharacterized protein LOC100801034 [Glycine max]
Glyma08g01930	3718	57	23	1.82205	0.718221	-1.34306	Down	8.25e-05	0.000925589	-	GO:0043231//intracellular membrane-bounded organelle;GO:0031224//intrinsic to membrane	GO:0004872//receptor activity;GO:0016462//pyrophosphatase activity;GO:0032559	GO:0006952//defense response;GO:0012501//programmed cell death;GO:0023052//signaling	gi|356527642|ref|XP_003532417.1|/0/PREDICTED: uncharacterized protein LOC100815488 [Glycine max]
Glyma03g36893	2814	64	26	2.70303	1.07273	-1.33329	Down	3.3e-05	0.00041002	-	-	GO:0060089;GO:0060089	GO:0009314//response to radiation;GO:0000904//cell morphogenesis involved in differentiation;GO:0023052//signaling;GO:0009314//response to radiation;GO:0000904//cell morphogenesis involved in differentiation;GO:0023052//signaling	gi|356505528|ref|XP_003521542.1|/0/PREDICTED: BTB/POZ domain-containing protein At1g03010-like [Glycine max]
Glyma06g48190	2519	118	48	5.56735	2.21234	-1.33141	Down	1.63e-08	3.8e-07	-	-	-	-	gi|356515412|ref|XP_003526394.1|/0/PREDICTED: uncharacterized protein LOC100786015 [Glycine max]
Glyma20g32135	2681	531	216	23.5392	9.35398	-1.33141	Down	3.02e-33	4.1e-31	K10775|1|0.0|1385|gmx:100818777|phenylalanine ammonia-lyase [EC:4.3.1.24]	GO:0044424//intracellular part	GO:0016840	GO:0006558//L-phenylalanine metabolic process	gi|356576233|ref|XP_003556238.1|/0/PREDICTED: phenylalanine ammonia-lyase 2-like [Glycine max]
Glyma01g03790	2320	76	31	3.89332	1.55136	-1.32746	Down	6.38e-06	9.41e-05	-	-	-	-	gi|356497761|ref|XP_003517727.1|/0/PREDICTED: uncharacterized protein LOC100808883 [Glycine max]
Glyma17g08250	2489	161	66	7.68768	3.07864	-1.32026	Down	5.36e-11	1.71e-09	-	GO:0043231//intracellular membrane-bounded organelle	-	-	gi|356564911|ref|XP_003550690.1|/0/PREDICTED: reticulon-like protein B21-like [Glycine max]
Glyma09g04337	3262	1200	492	43.7212	17.5114	-1.32004	Down	4.97e-72	2.29e-69	K05349|1|0.0|880|rcu:RCOM_1347430|beta-glucosidase [EC:3.2.1.21]	GO:0005576//extracellular region;GO:0005618//cell wall;GO:0005576//extracellular region;GO:0005618//cell wall	GO:0015926//glucosidase activity;GO:0015926//glucosidase activity	GO:0044238//primary metabolic process;GO:0003006//developmental process involved in reproduction;GO:0044238//primary metabolic process;GO:0003006//developmental process involved in reproduction	gi|356529243|ref|XP_003533205.1|/0/PREDICTED: beta-D-xylosidase 1-like [Glycine max]
Glyma06g09910	2384	248	102	12.3635	4.96745	-1.3155	Down	4.4e-16	2.31e-14	K14505|1|2e-42|172|rcu:RCOM_0811920|cyclin D3, plant;K10151|3|4e-42|171|pop:POPTR_804326|cyclin D2	GO:0043231//intracellular membrane-bounded organelle	-	GO:0009987//cellular process	gi|255642346|gb|ACU21437.1|/0/unknown [Glycine max]
Glyma09g37000	3029	68	28	2.66811	1.07324	-1.31384	Down	2.31e-05	0.000299043	-	-	-	-	gi|356568688|ref|XP_003552542.1|/0/PREDICTED: phosphate transporter PHO1 homolog 9-like [Glycine max]
Glyma17g33670	4165	153	63	4.36587	1.75616	-1.31384	Down	1.88e-10	5.64e-09	K14489|1|4e-43|176|zma:541642|arabidopsis histidine kinase 2/3/4 (cytokinin receptor) [EC:2.7.13.3]	GO:0016020//membrane;GO:0043231//intracellular membrane-bounded organelle	GO:0004871//signal transducer activity;GO:0004673//protein histidine kinase activity	GO:0044260;GO:0010119//regulation of stomatal movement;GO:0034614//cellular response to reactive oxygen species;GO:0009873//ethylene mediated signaling pathway;GO:0016310//phosphorylation;GO:0048513//organ development;GO:0044238//primary metabolic process;GO:0009738//abscisic acid mediated signaling pathway;GO:0002237//response to molecule of bacterial origin;GO:0071241//cellular response to inor…	gi|356552435|ref|XP_003544573.1|/0/PREDICTED: histidine kinase 5-like [Glycine max]
Glyma15g20970	1106	274	113	29.4435	11.8621	-1.31159	Down	1.54e-17	9.02e-16	K15441|1|2e-08|57.8|ppp:PHYPADRAFT_86831|tRNA-specific adenosine deaminase 2 [EC:3.5.4.-]	-	GO:0003824//catalytic activity;GO:0046914//transition metal ion binding;GO:0016814//hydrolase activity, acting on carbon-nitrogen (but not peptide) bonds, in cyclic amidines;GO:0046914//transition metal ion binding	-	gi|351721430|ref|NP_001236185.1|/1.16092e-99/uncharacterized protein LOC100305493 [Glycine max]
Glyma08g01160	4992	75	31	1.78559	0.720986	-1.30836	Down	9.27e-06	0.000131996	K03696|1|1e-177|623|gmx:100796195|ATP-dependent Clp protease ATP-binding subunit ClpC	GO:0044424//intracellular part	GO:0046914//transition metal ion binding;GO:0016616//oxidoreductase activity, acting on the CH-OH group of donors, NAD or NADP as acceptor;GO:0004721//phosphoprotein phosphatase activity	GO:0009642//response to light intensity;GO:0010118//stomatal movement;GO:0009725//response to hormone stimulus;GO:0006796//phosphate-containing compound metabolic process;GO:0072387;GO:0030865//cortical cytoskeleton organization;GO:0007127//meiosis I;GO:0009657//plastid organization;GO:0010467//gene expression	gi|357520579|ref|XP_003630578.1|/0/Dual specificity protein phosphatase [Medicago truncatula]
Glyma02g46965	2028	87	36	5.09854	2.06098	-1.30675	Down	1.8e-06	2.98e-05	-	-	-	-	gi|356499443|ref|XP_003518550.1|/8.56828e-83/PREDICTED: uncharacterized protein LOC100814985 [Glycine max]
Glyma19g33451	2720	65	27	2.84013	1.15248	-1.30121	Down	4.02e-05	0.000487554	K04733|1|8e-65|247|smo:SELMODRAFT_159261|interleukin-1 receptor-associated kinase 4 [EC:2.7.11.1];K13416|4|2e-56|219|rcu:RCOM_1534760|brassinosteroid insensitive 1-associated receptor kinase 1 [EC:2.7.10.1 2.7.11.1];K00924|5|3e-56|218|ath:AT1G14370|[EC:2.7.1.-]	GO:0016020//membrane	GO:0004674//protein serine/threonine kinase activity;GO:0000166//nucleotide binding	-	gi|356570546|ref|XP_003553446.1|/0/PREDICTED: probable LRR receptor-like serine/threonine-protein kinase RKF3-like [Glycine max]
Glyma02g00550	2763	252	105	10.8396	4.41213	-1.29677	Down	5.41e-16	2.81e-14	-	-	GO:0016741;GO:0046914//transition metal ion binding	GO:0006730//one-carbon metabolic process	gi|356501308|ref|XP_003519467.1|/0/PREDICTED: probable methyltransferase PMT8-like [Glycine max]
Glyma02g17010	2082	79	33	4.50963	1.84023	-1.29312	Down	6.47e-06	9.54e-05	K14493|1|4e-164|576|pop:POPTR_552633|gibberellin receptor GID1 [EC:3.-.-.-]	-	GO:0004871//signal transducer activity;GO:0003824//catalytic activity	-	gi|356500238|ref|XP_003518940.1|/0/PREDICTED: gibberellin receptor GID1B-like [Glycine max]
Glyma08g25950	2060	2300	964	132.695	54.3312	-1.28826	Down	2.37e-131	3.2e-128	K15638|1|6e-121|433|ath:AT1G17060|cytochrome P450, family 72, subfamily C, polypeptide 1;K15639|3|6e-113|406|aly:ARALYDRAFT_901457|cytochrome P450, family 734, subfamily A, polypeptide 1 (PHYB activation tagged suppressor 1) [EC:1.14.-.-];K10717|5|1e-83|309|pop:POPTR_743744|cytokinin trans-hydroxylase	-	GO:0016491//oxidoreductase activity;GO:0005506//iron ion binding;GO:0016491//oxidoreductase activity;GO:0005506//iron ion binding	GO:0008152//metabolic process;GO:0008152//metabolic process	gi|356526435|ref|XP_003531823.1|/0/PREDICTED: secologanin synthase-like isoform 1 [Glycine max]
Glyma08g28920	5348	167	70	3.71124	1.51966	-1.28815	Down	5.53e-11	1.76e-09	K15732|1|3e-42|173|mtr:MTR_2g048610|RNA polymerase II subunit A C-terminal domain phosphatase [EC:3.1.3.16]	GO:0043231//intracellular membrane-bounded organelle	GO:0005515//protein binding	GO:0006970//response to osmotic stress;GO:0048764;GO:0009738//abscisic acid mediated signaling pathway;GO:0003006//developmental process involved in reproduction	gi|356523718|ref|XP_003530482.1|/0/PREDICTED: RNA polymerase II C-terminal domain phosphatase-like 3-like [Glycine max]
Glyma03g04880	1444	333	140	27.4076	11.2564	-1.28383	Down	2.36e-20	1.63e-18	K00430|1|1e-105|381|zma:100125639|peroxidase [EC:1.11.1.7]	-	GO:0046872//metal ion binding;GO:0003824//catalytic activity	GO:0006950//response to stress;GO:0008152//metabolic process	gi|356506724|ref|XP_003522126.1|/0/PREDICTED: cationic peroxidase 1-like [Glycine max]
Glyma13g28370	2351	88	37	4.44861	1.82721	-1.28371	Down	2.18e-06	3.55e-05	K04733|1|7e-60|230|smo:SELMODRAFT_159261|interleukin-1 receptor-associated kinase 4 [EC:2.7.11.1];K13416|4|1e-55|216|rcu:RCOM_1534760|brassinosteroid insensitive 1-associated receptor kinase 1 [EC:2.7.10.1 2.7.11.1];K13418|5|1e-54|213|aly:ARALYDRAFT_895025|somatic embryogenesis receptor kinase 1 [EC:2.7.10.1 2.7.11.1]	GO:0042579//microbody;GO:0042579//microbody;GO:0042579//microbody;GO:0042579//microbody	GO:0004672//protein kinase activity;GO:0032559;GO:0004672//protein kinase activity;GO:0032559;GO:0004672//protein kinase activity;GO:0032559;GO:0004672//protein kinase activity;GO:0032559	GO:0006464//cellular protein modification process;GO:0006464//cellular protein modification process;GO:0006464//cellular protein modification process;GO:0006464//cellular protein modification process	gi|356546462|ref|XP_003541645.1|/0/PREDICTED: uncharacterized protein LOC100818794 [Glycine max]
Glyma19g01090	1733	95	40	6.51508	2.67979	-1.28166	Down	8.82e-07	1.56e-05	K01206|1|3e-79|261|aly:ARALYDRAFT_475890|alpha-L-fucosidase [EC:3.2.1.51];K00514|5|3e-21|102|rcu:RCOM_1428040|zeta-carotene desaturase [EC:1.3.5.6]	-	GO:0016787//hydrolase activity;GO:0016787//hydrolase activity	GO:0044238//primary metabolic process	gi|363808274|ref|NP_001241984.1|/7.40166e-177/uncharacterized protein LOC100785435 precursor [Glycine max]
Glyma02g09600	2169	161	68	8.82187	3.6399	-1.27719	Down	1.62e-10	4.9e-09	K09284|1|3e-71|268|pop:POPTR_820288|AP2-like factor, euAP2 lineage	-	-	GO:0008152//metabolic process	gi|356502406|ref|XP_003520010.1|/0/PREDICTED: ethylene-responsive transcription factor RAP2-7-like [Glycine max]
Glyma15g22410	2032	97	41	5.67339	2.34261	-1.27609	Down	7.37e-07	1.32e-05	-	GO:0016020//membrane	-	GO:0010101	gi|356558550|ref|XP_003547568.1|/0/PREDICTED: uncharacterized protein LOC100807099 [Glycine max]
Glyma04g02580	1906	314	133	19.5795	8.10156	-1.27307	Down	4.76e-19	3.02e-17	-	GO:0031224//intrinsic to membrane	-	GO:0009607//response to biotic stimulus	gi|356509626|ref|XP_003523547.1|/1.67123e-177/PREDICTED: thaumatin-like protein 1-like [Glycine max]
Glyma09g40800	2570	288	122	13.3185	5.51146	-1.27292	Down	1.36e-17	7.96e-16	-	GO:0016020//membrane	-	-	gi|356530155|ref|XP_003533649.1|/4.37738e-131/PREDICTED: uncharacterized protein LOC100808700 [Glycine max]
Glyma11g03500	1459	212	90	17.2693	7.16188	-1.2698	Down	2.71e-13	1.12e-11	K00924|1|4e-07|54.7|aly:ARALYDRAFT_489138|[EC:2.7.1.-]	GO:0005618//cell wall	GO:0008233//peptidase activity	GO:0019538//protein metabolic process	gi|356540510|ref|XP_003538731.1|/0/PREDICTED: aspartic proteinase nepenthesin-1-like [Glycine max]
Glyma14g13320	2861	103	44	4.27872	1.78556	-1.2608	Down	4.29e-07	8.11e-06	K14491|1|0.0|1301|gmx:100803879|two-component response regulator ARR-B family	-	-	-	gi|356554201|ref|XP_003545437.1|/0/PREDICTED: LOW QUALITY PROTEIN: two-component response regulator ARR12-like [Glycine max]
Glyma01g20460	3027	1049	449	41.1867	17.2216	-1.25796	Down	9.25e-59	2.67e-56	K15925|1|0.0|1801|gmx:100808526|alpha-D-xyloside xylohydrolase [EC:3.2.1.177]	GO:0005618//cell wall;GO:0005576//extracellular region;GO:0009536//plastid	GO:0005488//binding;GO:0004558//alpha-glucosidase activity	GO:0006073//cellular glucan metabolic process;GO:0000272//polysaccharide catabolic process;GO:0010038//response to metal ion	gi|356495935|ref|XP_003516826.1|/0/PREDICTED: alpha-xylosidase-like [Glycine max]
Glyma01g39350	1906	231	99	14.404	6.03048	-1.25613	Down	3.86e-14	1.71e-12	K01058|1|1e-06|53.5|mtr:MTR_7g081620|phospholipase A1 [EC:3.1.1.32]	-	GO:0004091//carboxylesterase activity	GO:0044238//primary metabolic process	gi|359806059|ref|NP_001240924.1|/0/uncharacterized protein LOC100795779 [Glycine max]
Glyma11g20461	3577	112	48	3.72129	1.55798	-1.25613	Down	1.45e-07	2.97e-06	-	-	-	-	gi|356541479|ref|XP_003539203.1|/0/PREDICTED: uncharacterized protein LOC100813608 [Glycine max]
Glyma08g31890	3160	235	101	8.83843	3.71086	-1.25204	Down	2.71e-14	1.22e-12	K15925|1|0.0|1820|gmx:100808526|alpha-D-xyloside xylohydrolase [EC:3.2.1.177]	GO:0005618//cell wall;GO:0005576//extracellular region;GO:0009536//plastid	GO:0005488//binding;GO:0004558//alpha-glucosidase activity	GO:0006073//cellular glucan metabolic process;GO:0000272//polysaccharide catabolic process;GO:0010038//response to metal ion	gi|356526649|ref|XP_003531929.1|/0/PREDICTED: alpha-xylosidase-like [Glycine max]
Glyma07g16740	2175	72	31	3.9343	1.65479	-1.24946	Down	2.79e-05	0.000352637	K14638|1|1e-128|458|ppp:PHYPADRAFT_134814|solute carrier family 15 (peptide/histidine transporter), member 3/4	GO:0031224//intrinsic to membrane	-	GO:0015833//peptide transport	gi|356520927|ref|XP_003529111.1|/0/PREDICTED: putative peptide/nitrate transporter At2g37900-like [Glycine max]
Glyma15g08020	6251	65	28	1.23583	0.520054	-1.24875	Down	6.98e-05	0.000794924	K11000|1|0.0|3482|gmx:100812250|callose synthase [EC:2.4.1.-]	GO:0043234//protein complex;GO:0016020//membrane;GO:0043234//protein complex;GO:0016020//membrane;GO:0043234//protein complex;GO:0016020//membrane	GO:0035251//UDP-glucosyltransferase activity;GO:0035251//UDP-glucosyltransferase activity;GO:0035251//UDP-glucosyltransferase activity	GO:0051707//response to other organism;GO:0052482;GO:0048229//gametophyte development;GO:0002218//activation of innate immune response;GO:0009887//organ morphogenesis;GO:0006074//(1->3)-beta-D-glucan metabolic process;GO:0007165//signal transduction;GO:0010260//organ senescence;GO:0051707//response to other organism;GO:0052482;GO:0048229//gametophyte development;GO:0002218//activation of innate i…	gi|356557685|ref|XP_003547144.1|/0/PREDICTED: callose synthase 11-like [Glycine max]
Glyma17g11420	1688	160	69	11.2653	4.74588	-1.24714	Down	3.94e-10	1.13e-08	K01090|1|2e-97|355|osa:4341433|protein phosphatase [EC:3.1.3.16]	GO:0043234//protein complex;GO:0043234//protein complex	GO:0043169//cation binding;GO:0004721//phosphoprotein phosphatase activity;GO:0043169//cation binding;GO:0004721//phosphoprotein phosphatase activity	GO:0006464//cellular protein modification process;GO:0006464//cellular protein modification process	gi|356565135|ref|XP_003550800.1|/0/PREDICTED: probable protein phosphatase 2C 27-like [Glycine max]
Glyma20g16480	2677	357	154	15.8495	6.67901	-1.24673	Down	8.3e-21	5.93e-19	-	GO:0044464//cell part	GO:0015197//peptide transporter activity	GO:0015833//peptide transport	gi|356575112|ref|XP_003555686.1|/0/PREDICTED: oligopeptide transporter 7-like [Glycine max]
Glyma06g27240	1456	183	79	14.9377	6.29949	-1.24565	Down	2.28e-11	7.61e-10	-	GO:0016020//membrane;GO:0016020//membrane	GO:0015205//nucleobase transmembrane transporter activity;GO:0015205//nucleobase transmembrane transporter activity	GO:0015851//nucleobase transport;GO:0015851//nucleobase transport	gi|356516979|ref|XP_003527168.1|/2.27614e-170/PREDICTED: probable purine permease 5-like [Glycine max]
Glyma11g21001	1225	1184	513	114.871	48.6207	-1.24037	Down	1.09e-64	3.79e-62	-	-	-	-	gi|296051287|gb|ADG86640.1|/3.79393e-118/disease resistance response protein 1 [Glycine max]
Glyma19g35270	4622	3223	1397	82.8752	35.0918	-1.23981	Down	1.03e-172	2.48e-169	K05681|1|4e-51|202|cme:CMS467C|ATP-binding cassette, subfamily G (WHITE), member 2;K12843|3|9e-46|184|vvi:100248403|U4/U6 small nuclear ribonucleoprotein PRP3	GO:0031224//intrinsic to membrane	GO:0017111//nucleoside-triphosphatase activity;GO:0015604//organic phosphonate transmembrane transporter activity;GO:0032559	GO:0009207;GO:0051234//establishment of localization	gi|356570682|ref|XP_003553514.1|/0/PREDICTED: pleiotropic drug resistance protein 1-like [Glycine max]
Glyma09g07100	2090	2616	1134	148.76	62.9951	-1.23968	Down	1.55e-140	2.79e-137	K12309|1|0.0|890|ath:AT3G52840|beta-galactosidase [EC:3.2.1.23];K01190|3|3e-69|261|cme:CMP078C|beta-galactosidase [EC:3.2.1.23]	-	GO:0030246//carbohydrate binding;GO:0015925;GO:0043167//ion binding	GO:0044238//primary metabolic process	gi|356532710|ref|XP_003534914.1|/0/PREDICTED: beta-galactosidase 1-like [Glycine max]
Glyma04g10900	1919	189	82	11.7053	4.96111	-1.23842	Down	1.33e-11	4.61e-10	K14411|1|3e-14|78.6|sbi:SORBI_02g037690|RNA-binding protein Musashi	-	GO:0005488//binding;GO:0003676//nucleic acid binding	-	gi|363807832|ref|NP_001242695.1|/2.31316e-126/uncharacterized protein LOC100811977 [Glycine max]
Glyma09g37280	1586	129	56	9.66676	4.09944	-1.23761	Down	2.4e-08	5.49e-07	K09874|1|2e-74|278|osa:4330713|aquaporin NIP	GO:0044420//extracellular matrix part;GO:0031224//intrinsic to membrane	GO:0015103//inorganic anion transmembrane transporter activity	GO:0015698//inorganic anion transport	gi|356531774|ref|XP_003534451.1|/5.44145e-147/PREDICTED: aquaporin NIP2-1-like [Glycine max]
Glyma15g03953	4048	78	34	2.29007	0.975165	-1.23167	Down	1.6e-05	0.000215974	-	-	-	-	gi|356557400|ref|XP_003547004.1|/0/PREDICTED: uncharacterized protein LOC100818834 [Glycine max]
Glyma07g29990	827	126	55	18.1075	7.72141	-1.22965	Down	4.09e-08	9.17e-07	-	-	-	-	gi|351725073|ref|NP_001235800.1|/5.42919e-42/uncharacterized protein LOC100500539 precursor [Glycine max]
Glyma17g16420	2204	71	31	3.82861	1.63301	-1.22928	Down	3.99e-05	0.000485389	K14500|1|0.0|985|gmx:100793576|BR-signaling kinase [EC:2.7.11.1]	GO:0016020//membrane	GO:0004871//signal transducer activity;GO:0004672//protein kinase activity;GO:0032559	GO:0006464//cellular protein modification process;GO:0043401//steroid hormone mediated signaling pathway	gi|356563447|ref|XP_003549974.1|/0/PREDICTED: probable serine/threonine-protein kinase At4g35230-like [Glycine max]
Glyma15g40370	4157	174	76	4.97466	2.12262	-1.22875	Down	1.12e-10	3.46e-09	K02519|1|0.0|1544|gmx:100778924|translation initiation factor IF-2	GO:0009526//plastid envelope	GO:0008135//translation factor activity, nucleic acid binding;GO:0000166//nucleotide binding	GO:0006412//translation	gi|356556945|ref|XP_003546780.1|/0/PREDICTED: translation initiation factor IF-2, chloroplastic-like [Glycine max]
Glyma20g25905	1964	80	35	4.84109	2.06903	-1.22638	Down	1.33e-05	0.000183058	K03327|1|0.0|848|gmx:100788647|multidrug resistance protein, MATE family	-	GO:0022857//transmembrane transporter activity	GO:0006810//transport	gi|356575608|ref|XP_003555931.1|/0/PREDICTED: MATE efflux family protein 7-like [Glycine max]
Glyma09g39200	1909	121	53	7.5331	3.22337	-1.22468	Down	8.36e-08	1.78e-06	K01184|1|1e-27|123|ath:AT5G17200|polygalacturonase [EC:3.2.1.15]	-	GO:0004553//hydrolase activity, hydrolyzing O-glycosyl compounds	GO:0044238//primary metabolic process;GO:0045229//external encapsulating structure organization	gi|356530050|ref|XP_003533597.1|/0/PREDICTED: probable polygalacturonase-like [Glycine max]
Glyma08g22290	3716	91	40	2.91045	1.24975	-1.2196	Down	3.7e-06	5.75e-05	-	GO:0044464//cell part	-	-	gi|356528950|ref|XP_003533060.1|/0/PREDICTED: uncharacterized protein LOC100795773 [Glycine max]
Glyma13g07200	2034	141	62	8.23877	3.539	-1.21909	Down	8.07e-09	1.97e-07	-	-	-	-	gi|356545647|ref|XP_003541248.1|/0/PREDICTED: uncharacterized protein LOC100815059 [Glycine max]
Glyma03g27830	2198	166	73	8.97583	3.85598	-1.21895	Down	3.86e-10	1.11e-08	K14638|1|3e-111|401|smo:SELMODRAFT_135522|solute carrier family 15 (peptide/histidine transporter), member 3/4	-	-	-	gi|356503359|ref|XP_003520477.1|/0/PREDICTED: probable nitrite transporter At1g68570-like [Glycine max]
Glyma08g23860	2502	382	168	18.1456	7.79582	-1.21884	Down	1.95e-21	1.45e-19	K00058|1|0.0|1159|gmx:100817949|D-3-phosphoglycerate dehydrogenase [EC:1.1.1.95]	-	GO:0031406//carboxylic acid binding;GO:0016616//oxidoreductase activity, acting on the CH-OH group of donors, NAD or NADP as acceptor;GO:0000166//nucleotide binding	GO:0006563//L-serine metabolic process	gi|356526328|ref|XP_003531770.1|/0/PREDICTED: d-3-phosphoglycerate dehydrogenase, chloroplastic-like [Glycine max]
Glyma10g33700	1164	234	103	23.8923	10.2736	-1.2176	Down	1.08e-13	4.6e-12	K09286|1|1e-24|112|sbi:SORBI_04g027660|EREBP-like factor	-	-	-	gi|356535478|ref|XP_003536272.1|/0/PREDICTED: ethylene-responsive transcription factor ERF062-like [Glycine max]
Glyma15g01890	2073	1245	550	71.378	30.8037	-1.21238	Down	1.37e-65	5.04e-63	-	-	-	-	gi|359807063|ref|NP_001241341.1|/9.72688e-86/uncharacterized protein LOC100818121 [Glycine max]
Glyma12g00720	823	129	57	18.6288	8.04109	-1.21207	Down	4.03e-08	9.04e-07	K01051|1|9e-12|68.9|ath:AT1G53830|pectinesterase [EC:3.1.1.11]	-	-	-	gi|351723031|ref|NP_001235217.1|/2.14516e-91/uncharacterized protein LOC100527377 precursor [Glycine max]
Glyma12g32020	3468	122	54	4.18095	1.80782	-1.20958	Down	9.88e-08	2.08e-06	K05387|1|0.0|997|aly:ARALYDRAFT_482168|glutamate receptor, ionotropic, other eukaryote	GO:0031224//intrinsic to membrane;GO:0030313	GO:0005488//binding;GO:0008066//glutamate receptor activity;GO:0005231//excitatory extracellular ligand-gated ion channel activity	GO:0009314//response to radiation;GO:0006810//transport;GO:0006875//cellular metal ion homeostasis;GO:0007166//cell surface receptor signaling pathway	gi|356543714|ref|XP_003540305.1|/0/PREDICTED: glutamate receptor 3.7-like [Glycine max]
Glyma12g32450	3325	70	31	2.50208	1.08245	-1.20882	Down	5.7e-05	0.000666948	K04733|1|4e-62|238|smo:SELMODRAFT_230241|interleukin-1 receptor-associated kinase 4 [EC:2.7.11.1];K13430|3|5e-58|224|zma:100283091|serine/threonine-protein kinase PBS1 [EC:2.7.11.1]	-	GO:0016772//transferase activity, transferring phosphorus-containing groups	-	gi|356547043|ref|XP_003541927.1|/0/PREDICTED: G-type lectin S-receptor-like serine/threonine-protein kinase At4g03230-like [Glycine max]
Glyma18g45000	2470	115	51	5.53344	2.39725	-1.2068	Down	2.43e-07	4.8e-06	-	GO:0016020//membrane	-	-	gi|356568262|ref|XP_003552332.1|/6.69161e-137/PREDICTED: uncharacterized protein LOC100818010 [Glycine max]
Glyma06g47730	1054	72	32	8.1187	3.52492	-1.20366	Down	4.73e-05	0.000563481	K01051|1|8e-09|59.7|pop:POPTR_553829|pectinesterase [EC:3.1.1.11]	-	-	-	gi|351721671|ref|NP_001237985.1|/2.9545e-113/uncharacterized protein LOC100527823 [Glycine max]
Glyma10g38650	2349	123	55	6.22324	2.71844	-1.19489	Down	1.16e-07	2.41e-06	K11262|1|8e-08|57.8|aly:ARALYDRAFT_473714|acetyl-CoA carboxylase / biotin carboxylase [EC:6.4.1.2 6.3.4.14]	GO:0005576//extracellular region	GO:0005515//protein binding;GO:0004175//endopeptidase activity	GO:0019538//protein metabolic process;GO:0044092//negative regulation of molecular function	gi|356535933|ref|XP_003536496.1|/0/PREDICTED: subtilisin-like protease-like [Glycine max]
Glyma09g05440	1889	496	222	31.2064	13.6446	-1.19351	Down	1.61e-26	1.62e-24	K00517|1|1e-137|488|ath:AT4G37360|[EC:1.14.-.-]	GO:0044464//cell part	GO:0016709//oxidoreductase activity, acting on paired donors, with incorporation or reduction of molecular oxygen, NAD(P)H as one donor, and incorporation of one atom of oxygen;GO:0005506//iron ion binding	GO:0008152//metabolic process	gi|358249142|ref|NP_001240000.1|/0/isoflavone 2'-hydroxylase-like [Glycine max]
Glyma10g16790	1527	448	201	34.8685	15.2826	-1.19004	Down	5.28e-24	4.52e-22	K13691|1|4e-32|137|pop:POPTR_810275|pathogen-inducible salicylic acid glucosyltransferase [EC:2.4.1.-];K13496|4|3e-30|131|ath:AT2G36770|UDP-glucosyl transferase 73C [EC:2.4.1.-]	-	GO:0016757//transferase activity, transferring glycosyl groups	-	gi|356534718|ref|XP_003535899.1|/0/PREDICTED: UDP-glycosyltransferase 91C1-like [Glycine max]
Glyma19g40470	1378	69	31	5.95106	2.61187	-1.18806	Down	8.1e-05	0.000911494	K13425|1|6e-29|127|ath:AT4G01250|WRKY transcription factor 22	-	GO:0003677//DNA binding;GO:0001071//nucleic acid binding transcription factor activity	GO:0010467//gene expression	gi|356572795|ref|XP_003554551.1|/3.26029e-145/PREDICTED: WRKY transcription factor 22 [Glycine max]
Glyma17g36800	2467	158	71	7.61171	3.3414	-1.18777	Down	2.2e-09	5.81e-08	-	-	-	-	gi|356562333|ref|XP_003549426.1|/0/PREDICTED: uncharacterized membrane protein At1g75140-like [Glycine max]
Glyma04g37910	1627	80	36	5.84382	2.56894	-1.18574	Down	2.23e-05	0.000290461	-	GO:0044464//cell part	-	GO:0051234//establishment of localization	gi|356508874|ref|XP_003523178.1|/1.02406e-148/PREDICTED: random slug protein 5-like [Glycine max]
Glyma19g01400	3614	171	77	5.62344	2.47367	-1.1848	Down	5.23e-10	1.48e-08	K03549|1|0.0|1088|mtr:MTR_5g034500|KUP system potassium uptake protein	GO:0044464//cell part	GO:0046873//metal ion transmembrane transporter activity	GO:0030001//metal ion transport;GO:0034220//ion transmembrane transport	gi|356573392|ref|XP_003554845.1|/0/PREDICTED: potassium transporter 8-like [Glycine max]
Glyma10g30930	3446	131	59	4.51804	1.98782	-1.18451	Down	5.56e-08	1.22e-06	K11583|1|0.0|1052|gmx:100792998|protein phosphatase 2 (formerly 2A), regulatory subunit B''	-	GO:0046872//metal ion binding	-	gi|356535212|ref|XP_003536142.1|/0/PREDICTED: serine/threonine-protein phosphatase 2A regulatory subunit B'' subunit alpha-like [Glycine max]
Glyma05g37980	4010	273	123	8.0912	3.56123	-1.18398	Down	4.11e-15	2e-13	K09291|1|4e-19|96.3|sbi:SORBI_04g028320|nucleoprotein TPR;K11498|3|5e-18|92.4|rcu:RCOM_0072440|centromeric protein E	-	-	-	gi|356528122|ref|XP_003532654.1|/0/PREDICTED: uncharacterized protein LOC100819574 isoform 2 [Glycine max]
Glyma10g30710	3488	277	125	9.43838	4.16077	-1.18169	Down	2.86e-15	1.41e-13	K00924|1|1e-170|598|ath:AT1G75820|[EC:2.7.1.-];K08286|5|1e-147|522|ath:AT4G28490|protein-serine/threonine kinase [EC:2.7.11.-]	GO:0016020//membrane	GO:0004871//signal transducer activity;GO:0016491//oxidoreductase activity;GO:0004674//protein serine/threonine kinase activity;GO:0032559	GO:0006464//cellular protein modification process	gi|356533648|ref|XP_003535373.1|/0/PREDICTED: leucine-rich repeat receptor-like protein kinase PXL1-like [Glycine max]
Glyma07g16020	1994	763	345	45.4772	20.0879	-1.17882	Down	3.64e-39	6.08e-37	K07025|1|2e-123|441|gmx:100796466|putative hydrolase of the HAD superfamily	-	GO:0003824//catalytic activity;GO:0003824//catalytic activity;GO:0003824//catalytic activity	-	gi|359807365|ref|NP_001241637.1|/2.08326e-171/uncharacterized protein LOC100795391 [Glycine max]
Glyma05g35730	2792	95	43	4.04392	1.7881	-1.17732	Down	4.26e-06	6.53e-05	-	GO:0044464//cell part;GO:0044464//cell part	-	-	gi|356511373|ref|XP_003524401.1|/0/PREDICTED: probable glycosyltransferase At5g03795-like [Glycine max]
Glyma02g12140	1594	75	34	5.592	2.47645	-1.17509	Down	4.6e-05	0.000549837	-	GO:0044464//cell part	-	-	gi|358248428|ref|NP_001240136.1|/4.36421e-128/expansin-A1-like precursor [Glycine max]
Glyma16g24341	2169	150	68	8.21913	3.6399	-1.17509	Down	7.55e-09	1.85e-07	K09755|1|0.0|980|gmx:100807448|ferulate-5-hydroxylase [EC:1.14.-.-]	-	GO:0016491//oxidoreductase activity;GO:0005506//iron ion binding	GO:0008152//metabolic process	gi|356559331|ref|XP_003547953.1|/0/PREDICTED: cytochrome P450 84A1-like [Glycine max]
Glyma10g05630	2455	75	34	3.63082	1.60793	-1.17509	Down	4.6e-05	0.000549989	K15336|1|1e-27|123|vvi:100259391|tRNA (cytosine38-C5)-methyltransferase [EC:2.1.1.204]	GO:0009532//plastid stroma	-	GO:0006396//RNA processing	gi|356536919|ref|XP_003536980.1|/0/PREDICTED: pentatricopeptide repeat-containing protein At3g09650, chloroplastic-like [Glycine max]
Glyma02g00960	2202	185	84	9.98502	4.42896	-1.1728	Down	1.45e-10	4.43e-09	K09422|1|0.0|793|gmx:100782199|myb proto-oncogene protein, plant	-	-	-	gi|356501821|ref|XP_003519722.1|/0/PREDICTED: uncharacterized protein LOC100782199 [Glycine max]
Glyma17g29320	1535	110	50	8.51684	3.78182	-1.17124	Down	8.2e-07	1.46e-05	K00430|1|2e-131|468|vvi:100261539|peroxidase [EC:1.11.1.7]	-	GO:0005506//iron ion binding;GO:0003824//catalytic activity;GO:0016209//antioxidant activity	GO:0008152//metabolic process;GO:0006950//response to stress	gi|359806759|ref|NP_001241556.1|/0/uncharacterized protein LOC100793327 precursor [Glycine max]
Glyma17g10206	2515	134	61	6.3323	2.81599	-1.16909	Down	5.4e-08	1.19e-06	-	-	-	-	gi|356565049|ref|XP_003550757.1|/0/PREDICTED: microtubule-associated protein SPIRAL2-like [Glycine max]
Glyma05g37030	2039	182	83	10.6084	4.72607	-1.16649	Down	2.44e-10	7.2e-09	-	-	-	-	gi|356513299|ref|XP_003525351.1|/0/PREDICTED: uncharacterized protein LOC100816814 [Glycine max]
Glyma08g19290	1803	2495	1142	164.463	73.5377	-1.16121	Down	4.2e-121	4.55e-118	K13496|1|5e-31|134|ath:AT2G36800|UDP-glucosyl transferase 73C [EC:2.4.1.-];K12356|4|2e-29|129|ath:AT3G50740|coniferyl-alcohol glucosyltransferase [EC:2.4.1.111]	-	GO:0016757//transferase activity, transferring glycosyl groups	-	gi|359807261|ref|NP_001240857.1|/0/soyasaponin III rhamnosyltransferase [Glycine max]
Glyma08g43550	1338	266	122	23.6276	10.5863	-1.15828	Down	2.63e-14	1.19e-12	-	-	-	-	gi|356524305|ref|XP_003530770.1|/0/PREDICTED: probable long-chain-alcohol O-fatty-acyltransferase 1-like [Glycine max]
Glyma11g12770	2058	122	56	7.04545	3.15924	-1.15712	Down	2.68e-07	5.29e-06	-	-	-	-	gi|351721688|ref|NP_001236706.1|/9.22918e-121/uncharacterized protein LOC100527485 [Glycine max]
Glyma02g10800	2440	74	34	3.60443	1.61781	-1.15572	Down	6.49e-05	0.000745858	-	-	-	-	gi|356502452|ref|XP_003520033.1|/0/PREDICTED: aluminum-activated malate transporter 4-like [Glycine max]
Glyma02g04640	3788	117	54	3.67088	1.6551	-1.14921	Down	5.45e-07	1.01e-05	K11855|1|2e-108|392|ppp:PHYPADRAFT_11930|ubiquitin carboxyl-terminal hydrolase 36/42 [EC:3.1.2.15]	-	-	-	gi|356502067|ref|XP_003519843.1|/0/PREDICTED: ubiquitin carboxyl-terminal hydrolase 17-like [Glycine max]
Glyma04g16980	2886	130	60	5.35354	2.41376	-1.14921	Down	1.28e-07	2.63e-06	K13118|1|1e-17|90.5|cre:CHLREDRAFT_17930|protein DGCR14;K06276|3|2e-13|77.0|smo:SELMODRAFT_164063|3-phosphoinositide dependent protein kinase-1 [EC:2.7.11.1];K13414|5|2e-13|77.0|zma:100279294|mitogen-activated protein kinase kinase kinase 1, plant [EC:2.7.11.25]	GO:0005768//endosome;GO:0044431//Golgi apparatus part	GO:0046914//transition metal ion binding;GO:0004091//carboxylesterase activity;GO:0016301//kinase activity;GO:0019787//small conjugating protein ligase activity;GO:0032559	GO:0032446//protein modification by small protein conjugation;GO:0040007//growth;GO:0009755//hormone-mediated signaling pathway;GO:0006950//response to stress	gi|356508302|ref|XP_003522897.1|/0/PREDICTED: E3 ubiquitin-protein ligase KEG-like [Glycine max]
Glyma12g29922	5435	118	55	2.58034	1.17491	-1.13502	Down	6.32e-07	1.16e-05	K03580|1|1e-26|121|osa:4343299|ATP-dependent helicase HepA [EC:3.6.4.-];K11643|3|2e-19|97.4|gmx:100804203|chromodomain-helicase-DNA-binding protein 4 [EC:3.6.4.12]	GO:0043229//intracellular organelle;GO:0043229//intracellular organelle	GO:0005488//binding;GO:0005488//binding	GO:0051276//chromosome organization;GO:0051276//chromosome organization	gi|356547167|ref|XP_003541988.1|/0/PREDICTED: uncharacterized protein LOC100810773 [Glycine max]
Glyma11g06740	2218	118	55	6.32288	2.87899	-1.13502	Down	6.32e-07	1.16e-05	K13429|1|9e-56|216|ath:AT3G21630|chitin elicitor receptor kinase 1	-	GO:0004871//signal transducer activity;GO:0004672//protein kinase activity;GO:0032559	GO:0009056//catabolic process;GO:0006464//cellular protein modification process	gi|148362061|gb|ABQ59609.1|/0/NFR5a [Glycine max]
Glyma09g04560	2634	252	118	11.3705	5.20123	-1.12837	Down	3.94e-13	1.61e-11	K01184|1|5e-22|105|ath:AT3G15720|polygalacturonase [EC:3.2.1.15]	-	GO:0004553//hydrolase activity, hydrolyzing O-glycosyl compounds	GO:0044238//primary metabolic process;GO:0045229//external encapsulating structure organization	gi|356529330|ref|XP_003533248.1|/0/PREDICTED: probable polygalacturonase-like [Glycine max]
Glyma19g42370	3575	143	67	4.75395	2.1759	-1.12752	Down	4.83e-08	1.07e-06	K01192|1|3e-07|56.6|vcn:VOLCADRAFT_118894|beta-mannosidase [EC:3.2.1.25]	-	GO:0015923//mannosidase activity;GO:0043167//ion binding	GO:0044238//primary metabolic process	gi|356571117|ref|XP_003553727.1|/0/PREDICTED: mannosylglycoprotein endo-beta-mannosidase-like [Glycine max]
Glyma03g34560	798	96	45	14.2976	6.54711	-1.12684	Down	8.06e-06	0.00011694	-	-	-	-	gi|356505291|ref|XP_003521425.1|/1.52633e-102/PREDICTED: pistil-specific extensin-like protein-like [Glycine max]
Glyma10g42870	1536	480	225	37.1402	17.0071	-1.12684	Down	1.34e-23	1.12e-21	K09838|1|3e-17|88.2|ath:AT5G67030|zeaxanthin epoxidase [EC:1.14.13.90]	-	GO:0016491//oxidoreductase activity	GO:0008152//metabolic process	gi|356536384|ref|XP_003536718.1|/0/PREDICTED: 6-hydroxynicotinate 3-monooxygenase-like [Glycine max]
Glyma15g15200	1484	1418	665	113.563	52.0268	-1.12616	Down	2.22e-66	8.57e-64	-	GO:0043231//intracellular membrane-bounded organelle	GO:0043167//ion binding;GO:0008422//beta-glucosidase activity	GO:0044238//primary metabolic process;GO:0006950//response to stress	gi|356556022|ref|XP_003546326.1|/0/PREDICTED: glucan endo-1,3-beta-glucosidase, basic isoform-like [Glycine max]
Glyma15g15350	3323	81	38	2.897	1.32768	-1.12566	Down	4.25e-05	0.000511585	-	-	GO:0005515//protein binding;GO:0005515//protein binding	-	gi|356558139|ref|XP_003547365.1|/0/PREDICTED: calmodulin-binding transcription activator 5-like [Glycine max]
Glyma02g08920	4292	2017	947	55.8522	25.6171	-1.12451	Down	2e-93	1.38e-90	K10999|1|0.0|1817|gmx:100806786|cellulose synthase A [EC:2.4.1.12]	GO:0031224//intrinsic to membrane	GO:0016759//cellulose synthase activity;GO:0046914//transition metal ion binding	GO:0045229//external encapsulating structure organization;GO:0009250//glucan biosynthetic process	gi|356499529|ref|XP_003518592.1|/0/PREDICTED: cellulose synthase A catalytic subunit 6 [UDP-forming]-like [Glycine max]
Glyma10g37710	2367	247	116	12.402	5.68983	-1.12412	Down	7.88e-13	3.11e-11	K14430|1|5e-06|51.6|cme:CMP026C|phosphate transporter	-	-	GO:0006810//transport;GO:0006810//transport;GO:0006810//transport	gi|356535849|ref|XP_003536455.1|/0/PREDICTED: putative transporter arsB-like [Glycine max]
Glyma01g06030	1888	119	56	7.49099	3.4437	-1.1212	Down	7.3e-07	1.31e-05	-	GO:0044464//cell part	-	-	gi|356498332|ref|XP_003518007.1|/1.98653e-122/PREDICTED: expansin-A1-like [Glycine max]
Glyma10g43420	2066	308	145	17.718	8.14849	-1.12061	Down	1.45e-15	7.35e-14	K00924|1|8e-22|103|aly:ARALYDRAFT_489138|[EC:2.7.1.-]	-	-	GO:0019538//protein metabolic process	gi|356536463|ref|XP_003536757.1|/0/PREDICTED: aspartic proteinase nepenthesin-1-like [Glycine max]
Glyma09g40336	3981	87	41	2.5973	1.19573	-1.11912	Down	2.4e-05	0.000309135	-	-	-	-	gi|356530129|ref|XP_003533636.1|/0/PREDICTED: uncharacterized protein LOC100800714 [Glycine max]
Glyma18g12210	2066	968	458	55.6852	25.738	-1.11339	Down	4.52e-45	9.11e-43	K13065|1|5e-59|227|vvi:100265530|shikimate O-hydroxycinnamoyltransferase [EC:2.3.1.133]	-	-	-	gi|356567390|ref|XP_003551903.1|/0/PREDICTED: hydroxycinnamoyl-Coenzyme A shikimate/quinate hydroxycinnamoyltransferase-like [Glycine max]
Glyma10g28460	2517	76	36	3.5886	1.66058	-1.11174	Down	8.69e-05	0.000969265	K06675|1|4e-06|51.6|mtr:MTR_8g072890|structural maintenance of chromosome 4	-	-	-	gi|356534981|ref|XP_003536028.1|/5.47867e-132/PREDICTED: uncharacterized protein LOC100777398 isoform 1 [Glycine max]
Glyma10g28270	3956	285	135	8.56215	3.96202	-1.11174	Down	2.39e-14	1.08e-12	K11267|1|2e-06|53.5|ppp:PHYPADRAFT_66246|sister chromatid cohesion protein PDS5;K11294|2|5e-06|52.4|ppp:PHYPADRAFT_167900|nucleolin	-	-	-	gi|356533515|ref|XP_003535309.1|/0/PREDICTED: uncharacterized protein LOC100790707 [Glycine max]
Glyma18g29605	1066	76	36	8.47326	3.92089	-1.11174	Down	8.69e-05	0.000969015	K05572|1|4e-43|173|gmx:3989356|NAD(P)H-quinone oxidoreductase subunit 1 [EC:1.6.5.3]	GO:0016020//membrane;GO:0009536//plastid	-	-	gi|357467749|ref|XP_003604159.1|/9.80883e-64/NAD(P)H-quinone oxidoreductase subunit H [Medicago truncatula]
Glyma11g10760	2326	158	75	8.07313	3.74362	-1.1087	Down	1.51e-08	3.56e-07	K01179|1|2e-111|402|gmx:100814545|endoglucanase [EC:3.2.1.4]	GO:0031410//cytoplasmic vesicle	GO:0004553//hydrolase activity, hydrolyzing O-glycosyl compounds;GO:0005488//binding	GO:0044238//primary metabolic process	gi|356540986|ref|XP_003538965.1|/0/PREDICTED: endoglucanase 5-like [Glycine max]
Glyma02g28880	1351	242	115	21.289	9.88285	-1.10711	Down	2.5e-12	9.42e-11	K00430|1|3e-156|550|gmx:100811249|peroxidase [EC:1.11.1.7]	-	GO:0005506//iron ion binding;GO:0003824//catalytic activity;GO:0016209//antioxidant activity	GO:0008152//metabolic process;GO:0006950//response to stress	gi|356500429|ref|XP_003519034.1|/5.23156e-156/PREDICTED: peroxidase 53-like isoform 2 [Glycine max]
Glyma09g07650	3599	82	39	2.70786	1.25812	-1.10588	Down	4.9e-05	0.000582258	K14497|1|1e-120|432|vvi:100267957|protein phosphatase 2C [EC:3.1.3.16]	-	GO:0003824//catalytic activity;GO:0003824//catalytic activity;GO:0003824//catalytic activity	-	gi|356532744|ref|XP_003534931.1|/0/PREDICTED: probable protein phosphatase 2C 6-like [Glycine max]
Glyma11g19920	1571	269	128	20.3503	9.45962	-1.1052	Down	1.65e-13	6.9e-12	K08235|1|1e-151|534|gmx:100776165|xyloglucan:xyloglucosyl transferase [EC:2.4.1.207]	GO:0005576//extracellular region;GO:0030312//external encapsulating structure	GO:0016798//hydrolase activity, acting on glycosyl bonds;GO:0016758//transferase activity, transferring hexosyl groups	GO:0044042//glucan metabolic process	gi|359806416|ref|NP_001241497.1|/1.79653e-150/uncharacterized protein LOC100776165 precursor [Glycine max]
Glyma06g16835	3447	126	60	4.34434	2.02092	-1.10412	Down	4.78e-07	8.95e-06	-	GO:0043231//intracellular membrane-bounded organelle;GO:0043231//intracellular membrane-bounded organelle	-	-	gi|356518830|ref|XP_003528080.1|/0/PREDICTED: uncharacterized protein LOC100782302 [Glycine max]
Glyma12g24250	1670	128	61	9.10936	4.24085	-1.103	Down	3.96e-07	7.52e-06	-	-	-	-	gi|356545429|ref|XP_003541145.1|/2.93786e-90/PREDICTED: uncharacterized protein LOC100797647 [Glycine max]
Glyma16g26520	1900	245	117	15.3252	7.14944	-1.10001	Down	2.38e-12	8.98e-11	K00517|1|2e-156|550|ath:AT4G37370|[EC:1.14.-.-]	GO:0044464//cell part	GO:0016709//oxidoreductase activity, acting on paired donors, with incorporation or reduction of molecular oxygen, NAD(P)H as one donor, and incorporation of one atom of oxygen;GO:0005506//iron ion binding	GO:0008152//metabolic process	gi|356559512|ref|XP_003548043.1|/0/PREDICTED: isoflavone 2'-hydroxylase-like [Glycine max]
Glyma18g52050	3958	368	176	11.0501	5.1627	-1.09786	Down	9.29e-18	5.49e-16	K13420|1|4e-110|398|pop:POPTR_1075175|LRR receptor-like serine/threonine-protein kinase FLS2 [EC:2.7.11.1]	GO:0031224//intrinsic to membrane;GO:0031410//cytoplasmic vesicle	GO:0004672//protein kinase activity;GO:0004871//signal transducer activity;GO:0016628//oxidoreductase activity, acting on the CH-CH group of donors, NAD or NADP as acceptor;GO:0032559	GO:0007167//enzyme linked receptor protein signaling pathway;GO:0006464//cellular protein modification process	gi|356568921|ref|XP_003552656.1|/0/PREDICTED: probably inactive leucine-rich repeat receptor-like protein kinase At3g28040-like [Glycine max]
Glyma03g41360	2005	94	45	5.57196	2.60578	-1.09647	Down	1.56e-05	0.000211093	-	GO:0043234//protein complex	GO:0019787//small conjugating protein ligase activity	GO:0032446//protein modification by small protein conjugation	gi|356504135|ref|XP_003520854.1|/0/PREDICTED: U-box domain-containing protein 9-like [Glycine max]
Glyma06g17860	2322	380	182	19.4498	9.10016	-1.09579	Down	3.09e-18	1.86e-16	-	-	GO:0043169//cation binding;GO:0016791//phosphatase activity	-	gi|356516555|ref|XP_003526959.1|/0/PREDICTED: probable inactive purple acid phosphatase 27-like [Glycine max]
Glyma15g15370	2635	1463	701	65.987	30.8871	-1.09518	Down	1.72e-65	6.25e-63	K05349|1|0.0|877|rcu:RCOM_1347430|beta-glucosidase [EC:3.2.1.21]	GO:0005576//extracellular region;GO:0005618//cell wall;GO:0005576//extracellular region;GO:0005618//cell wall	GO:0015926//glucosidase activity;GO:0015926//glucosidase activity	GO:0044238//primary metabolic process;GO:0003006//developmental process involved in reproduction;GO:0044238//primary metabolic process;GO:0003006//developmental process involved in reproduction	gi|356556038|ref|XP_003546334.1|/0/PREDICTED: beta-D-xylosidase 1-like [Glycine max]
Glyma19g44310	2523	123	59	5.79405	2.71503	-1.0936	Down	7.97e-07	1.42e-05	K14506|1|0.0|896|vvi:100251627|jasmonic acid-amino synthetase;K14487|3|0.0|880|pop:POPTR_816623|auxin responsive GH3 gene family	-	-	-	gi|356571222|ref|XP_003553778.1|/0/PREDICTED: probable indole-3-acetic acid-amido synthetase GH3.5-like [Glycine max]
Glyma03g24990	3790	204	98	6.39713	3.00211	-1.09145	Down	2.09e-10	6.22e-09	-	GO:0000325//plant-type vacuole	GO:0046914//transition metal ion binding	GO:0006996//organelle organization	gi|356504517|ref|XP_003521042.1|/0/PREDICTED: vacuolar protein sorting-associated protein 11 homolog [Glycine max]
Glyma12g05770	2377	1130	544	56.4994	26.5711	-1.08838	Down	1.7e-50	3.86e-48	K01188|1|1e-142|505|sbi:SORBI_06g019840|beta-glucosidase [EC:3.2.1.21]	-	GO:0016798//hydrolase activity, acting on glycosyl bonds;GO:0043167//ion binding;GO:0016798//hydrolase activity, acting on glycosyl bonds;GO:0043167//ion binding	GO:0044238//primary metabolic process;GO:0044238//primary metabolic process	gi|351722468|ref|NP_001237501.1|/0/isoflavone conjugate-specific beta-glucosidase [Glycine max]
Glyma18g50630	3099	81	39	3.1064	1.46111	-1.08818	Down	6.8e-05	0.000777922	K04733|1|2e-166|585|aly:ARALYDRAFT_916421|interleukin-1 receptor-associated kinase 4 [EC:2.7.11.1];K13430|3|3e-60|232|sbi:SORBI_04g020990|serine/threonine-protein kinase PBS1 [EC:2.7.11.1];K00924|5|4e-60|231|ath:AT3G59420|[EC:2.7.1.-]	-	GO:0004672//protein kinase activity;GO:0000166//nucleotide binding	-	gi|356568787|ref|XP_003552590.1|/0/PREDICTED: receptor-like protein kinase FERONIA-like [Glycine max]
Glyma14g37730	2041	193	93	11.2385	5.29029	-1.08703	Down	7.29e-10	2.03e-08	K13692|1|2e-49|195|rcu:RCOM_1154190|UDP-glucose:(indol-3-yl)acetate beta-D-glucosyltransferase [EC:2.4.1.121];K13030|2|1e-48|193|sbi:SORBI_01g001220|cyanohydrin beta-glucosyltransferase [EC:2.4.1.85];K13691|3|1e-48|193|pop:POPTR_718172|pathogen-inducible salicylic acid glucosyltransferase [EC:2.4.1.-]	-	GO:0016758//transferase activity, transferring hexosyl groups	-	gi|356553110|ref|XP_003544901.1|/0/PREDICTED: UDP-glycosyltransferase 87A1-like [Glycine max]
Glyma05g00920	2102	85	41	4.80597	2.2646	-1.08557	Down	4.64e-05	0.000554129	K13681|1|0.0|1066|gmx:100803305|xyloglucan fucosyltransferase [EC:2.4.1.-]	GO:0000139//Golgi membrane;GO:0031224//intrinsic to membrane	GO:0031127//alpha-(1,2)-fucosyltransferase activity	GO:0045229//external encapsulating structure organization;GO:0042546//cell wall biogenesis;GO:0009250//glucan biosynthetic process	gi|356512053|ref|XP_003524735.1|/0/PREDICTED: galactoside 2-alpha-L-fucosyltransferase-like [Glycine max]
Glyma20g30320	1716	85	41	5.88703	2.774	-1.08557	Down	4.64e-05	0.000554281	K12843|1|2e-44|178|vvi:100248403|U4/U6 small nuclear ribonucleoprotein PRP3;K05681|3|3e-39|161|cme:CMS467C|ATP-binding cassette, subfamily G (WHITE), member 2;K05658|5|8e-18|90.5|ath:AT1G28010|ATP-binding cassette, subfamily B (MDR/TAP), member 1	GO:0044464//cell part	GO:0017111//nucleoside-triphosphatase activity;GO:0000166//nucleotide binding	-	gi|356576016|ref|XP_003556131.1|/0/PREDICTED: LOW QUALITY PROTEIN: ABC transporter G family member 8-like [Glycine max]
Glyma13g23680	2351	178	86	8.99833	4.24703	-1.0832	Down	3.69e-09	9.47e-08	K14638|1|4e-113|407|ppp:PHYPADRAFT_189464|solute carrier family 15 (peptide/histidine transporter), member 3/4	GO:0031224//intrinsic to membrane	-	GO:0006950//response to stress;GO:0015833//peptide transport;GO:0009719	gi|356548591|ref|XP_003542684.1|/0/PREDICTED: nitrate transporter 1.4-like [Glycine max]
Glyma09g15620	4496	2150	1041	56.8338	26.8822	-1.0801	Down	2.7e-93	1.82e-90	K10999|1|0.0|1987|gmx:100783162|cellulose synthase A [EC:2.4.1.12]	GO:0031224//intrinsic to membrane;GO:0031224//intrinsic to membrane	GO:0016759//cellulose synthase activity;GO:0046914//transition metal ion binding;GO:0016759//cellulose synthase activity;GO:0046914//transition metal ion binding	GO:0045229//external encapsulating structure organization;GO:0009250//glucan biosynthetic process;GO:0045229//external encapsulating structure organization;GO:0009250//glucan biosynthetic process	gi|356530659|ref|XP_003533898.1|/0/PREDICTED: cellulose synthase A catalytic subunit 3 [UDP-forming]-like [Glycine max]
Glyma02g47330	2804	204	99	8.64662	4.09918	-1.0768	Down	3.28e-10	9.54e-09	K06617|1|0.0|1562|gmx:100785582|raffinose synthase [EC:2.4.1.82]	GO:0009536//plastid	GO:0004672//protein kinase activity;GO:0008378//galactosyltransferase activity;GO:0032559	GO:0009725//response to hormone stimulus;GO:0009312//oligosaccharide biosynthetic process;GO:0005985//sucrose metabolic process;GO:0019406;GO:0023052//signaling;GO:0006950//response to stress;GO:0006464//cellular protein modification process	gi|356501667|ref|XP_003519645.1|/0/PREDICTED: probable galactinol--sucrose galactosyltransferase 1-like [Glycine max]
Glyma06g15640	4162	103	50	2.94123	1.39479	-1.07638	Down	8.33e-06	0.000120417	K14963|1|8e-20|98.2|mtr:MTR_4g119620|COMPASS component SWD3	-	-	-	gi|356518745|ref|XP_003528038.1|/0/PREDICTED: uncharacterized protein LOC100801576 [Glycine max]
Glyma18g18931	1733	317	154	21.7398	10.3172	-1.07529	Down	4.84e-15	2.35e-13	K08235|1|7e-178|622|gmx:100778993|xyloglucan:xyloglucosyl transferase [EC:2.4.1.207]	GO:0016021//integral to membrane;GO:0005576//extracellular region;GO:0030312//external encapsulating structure	GO:0016798//hydrolase activity, acting on glycosyl bonds;GO:0016758//transferase activity, transferring hexosyl groups	GO:0044042//glucan metabolic process;GO:0009827//plant-type cell wall modification	gi|356567624|ref|XP_003552017.1|/9.66687e-177/PREDICTED: probable xyloglucan endotransglucosylase/hydrolase protein 33-like [Glycine max]
Glyma14g04800	1797	144	70	9.52377	4.52262	-1.07438	Down	1.39e-07	2.84e-06	K13496|1|4e-64|244|ath:AT2G36780|UDP-glucosyl transferase 73C [EC:2.4.1.-]	-	GO:0016757//transferase activity, transferring glycosyl groups	-	gi|356554360|ref|XP_003545515.1|/0/PREDICTED: UDP-glycosyltransferase 92A1-like [Glycine max]
Glyma04g08710	3480	327	159	11.1677	5.30466	-1.074	Down	1.93e-15	9.66e-14	-	GO:0031410//cytoplasmic vesicle;GO:0031090//organelle membrane;GO:0043231//intracellular membrane-bounded organelle	-	-	gi|356507901|ref|XP_003522701.1|/0/PREDICTED: uncharacterized protein KIAA0090 homolog [Glycine max]
Glyma11g08850	1140	226	110	23.5612	11.2028	-1.07255	Down	4.25e-11	1.37e-09	-	-	-	-	gi|356538367|ref|XP_003537675.1|/7.29876e-161/PREDICTED: uncharacterized protein LOC100777229 [Glycine max]
Glyma10g30300	2223	236	115	12.6173	6.00618	-1.07089	Down	1.68e-11	5.75e-10	-	-	GO:0003676//nucleic acid binding	-	gi|351727268|ref|NP_001236643.1|/0/trihelix transcription factor [Glycine max]
Glyma10g03770	2982	123	60	4.90221	2.33606	-1.06936	Down	1.25e-06	2.14e-05	K13648|1|0.0|743|gmx:100793193|alpha-1,4-galacturonosyltransferase [EC:2.4.1.43]	-	GO:0016740//transferase activity;GO:0016740//transferase activity;GO:0016740//transferase activity	-	gi|356536655|ref|XP_003536852.1|/0/PREDICTED: probable galacturonosyltransferase 6-like [Glycine max]
[truncated: 68 more rows]

## Sheet: CK-5dR-VS-113-2-5dR.GeneDiffExp
Table S3:The information data of the DEGs in the 15 comparisons - CK-5dR vs 113-2-5dR
[truncated: 413 more rows]

## Sheet: CK-5dR-VS-USDA205-5dR.GeneDiffE
Table S3:The information data of the DEGs in the 15 comparisons - CK-5dR vs USDA205-5dR
[truncated: 531 more rows]

## Sheet: CK-7-24hR-VS-113-2-7-24hR.GeneD
Table S3:The information data of the DEGs in the 15 comparisons - CK-7-24hR vs 113-2-7-24hR
[truncated: 226 more rows]

## Sheet: CK-7-24hR-VS-USDA205-7-24hR.Gen
Table S3:The information data of the DEGs in the 15 comparisons - CK-7-24hR vs USDA205-7-24hR
[truncated: 131 more rows]

[truncated: 9 more sheets: CK-16dR-VS-113-2-16dR.GeneDiffE, CK-16dR-VS-USDA205-16dR.GeneDif, CK-21dR-VS-113-2-21dR.GeneDiffE, CK-21dR-VS-USDA205-21dR.GeneDif, USDA205-0.5hR-VS-113-2-0.5hR.Ge, USDA205-5dR-VS-113-2-5dR.GeneDi, USDA205-7-24hR-VS-113-2-7-24hR., USDA205-16dR-VS-113-2-16dR.Gene, USDA205-21dR-VS-113-2-21dR.Gene]
