# Supplementary material for: RNA-Seq Analysis of Differential Gene Expression Responding to Different Rhizobium Strains in Soybean (Glycine max) Roots
Source: Front Plant Sci. 2016 May 30;7:721. doi: 10.3389/fpls.2016.00721 (PMC4885319; doi:10.3389/fpls.2016.00721)
Supplement: Supplementary file 4 [file Table4.XLSX]

## Sheet: Sheet1
	Supplemental Table S4 The log2ratios of nodulins in soybean roots at five time points after inoculation with rhizobium strains 113-2 or USDA205.
	Genes	0.5hR	7-24hR	5dR	16dR	21dR
				CK VS 113-2
	Glyma01g03470	0.377961	1.09176	2.49308	1.61071	2.35832
	Glyma02g04180	-0.306291	1.3329	2.33516	1.78667	2.91597
	Glyma02g43320	0.421904	-0.027888	0.135692	1.8245	3.50838
	Glyma02g43341	-2.16306	1.61597	-1.97978	0.919345	2.41262
	Glyma05g08400	-0.312083	1.03101	2.22185	-2.16653	0.600842
	Glyma05g25010	-0.130637	-1.03938	2.21661	2.47715	2.84555
	Glyma06g06930	0.113782	2.32379	0.712092	1.9144	3.66658
	Glyma06g24760	0.229259	0.031006	1.10768	1.51147	2.35619
	Glyma06g42110	-0.02492	0.091349	-0.077083	0.040667	-1.23135
	Glyma08g08120	-1.5781	1.16851	1.47965	3.2373	4.55272
	Glyma08g12650	0.099976	0.73555	0.371687	2.47027	2.97305
	Glyma10g06810	-1.21552	-0.968994	2.02021	1.93329	2.38109
	Glyma10g34280	0.140133	0.031006	0.621665	3.08323	4.73456
	Glyma12g13130	0.634898	-0.621071	3.34214	1.936	-0.399158
	Glyma12g32270	-0.363245	-0.406481	-0.214456	-0.035998	-1.41661
	Glyma12g34100	-0.075595	0.155594	-0.106185	0.023683	-1.14487
	Glyma13g38150	-0.875077	-0.328397	-0.133195	0.007943	-1.71844
	Glyma13g40400	-0.066382	-0.148245	0.965509	2.94006	3.74842
	Glyma13g40820	-0.47856	-0.841615	0.429327	3.04292	0.593586
	Glyma15g05010	-0.138564	-0.106498	0.811268	3.18469	3.78123
	Glyma15g41445	1.59183	0.571574	0.522715	2.79245	3.14115
	Glyma17g08110	-1.40817	-0.968994	1.67918	1.81736	1.70737
	Glyma18g02230	3.00687	-0.290922	3.62902	2.18588	1.9864
	Glyma20g02921	-0.342283	-0.545919	0.691334	3.03239	3.55599
				CK VS USDA205
	Glyma02g43341	-1.6187	-5.75316	-1.97751	1.77685	2.18983
	Glyma02g43330	0.551229	0.014437	-1.56247	1.34061	1.77573
	Glyma10g06810	0.859352	-0.570526	-0.199901	0.552545	2.69767
	Glyma17g08110	-0.226378	-1.2486	-0.903508	0.932412	2.40417
	Glyma13g40820	-0.150773	-0.548499	-0.037881	0.83491	1.55742
	Glyma01g03470	0.814264	0.147703	0.601505	1.77201	1.77313
	Glyma02g04180	0.223425	0.423242	0.432293	2.08231	1.60106
	Glyma08g08120	-0.618696	0.277471	0.607454	3.57942	3.98913
	Glyma08g12650	0.582938	-0.492523	-0.250527	1.87394	2.80808
	Glyma10g34280	-0.081039	-1.19201	-0.376058	2.53317	3.33207
	Glyma15g05010	0.116292	-1.06648	-0.010298	2.46997	3.39504
	Glyma20g02921	0.269194	-1.18398	-0.129511	2.42427	3.18484
	Glyma05g25010	-0.033733	-0.677441	-0.562471	2.40224	3.62472
	Glyma15g41445	-0.618696	-0.27507	-0.392546	2.30569	3.29656
	Glyma02g43320	1.3355	-0.381492	0.192417	2.48768	2.66273
	Glyma13g40400	0.643446	-0.63128	0.205036	2.58828	3.01935
	Glyma06g06930	0.35329	1.21607	1.07694	2.51198	2.3306
	Glyma06g24760	1.77362	-0.570526	0.607454	1.50437	2.29758
	Glyma18g02230	3.28819	-1.30749	0.507919	1.66109	2.56152
	Glyma05g08400	0.899153	-0.742292	3.20306	0.839026	-1.41297
				USDA205 VS 113-2
	Glyma02g43341	-0.544362	7.36913	-0.002277	-1.27049	0.63577
	Glyma05g25010	-0.096903	-0.361942	2.77908	-1.14757	0.443307
	Glyma18g02230	-0.281328	1.01657	3.12111	-0.375641	0.325305
	Glyma17g08110	-1.18179	0.279604	2.58269	-0.586812	0.774961
	Glyma12g13130	0.128063	-1.346	2.14973	0.5843	-1.54939
	Glyma05g08400	-1.21124	1.7733	-0.981216	-0.753569	-0.238184
	Glyma12g32270	-0.006267	-0.096039	-0.435693	-0.877996	-1.01494
	Glyma02g43320	-0.913596	0.353604	-0.056725	-0.838232	1.02069
	Glyma06g06930	-0.239508	1.10772	-0.364847	-0.416198	1.15461
	Glyma08g12650	-0.482962	1.22807	0.622214	-0.337811	1.09911
	Glyma13g40400	-0.709828	0.483035	0.760472	-0.079284	1.16014
	Glyma20g02921	-0.611477	0.638058	0.820845	-0.152452	1.13172
	Glyma10g34280	0.221172	1.22302	0.997723	-0.24884	2.20139
	Glyma13g40820	-0.327787	-0.293115	0.467208	1.4855	-0.241324
	Glyma01g03470	-0.436303	0.944057	1.89157	-0.162423	0.586312
	Glyma02g04180	-0.529716	0.909654	1.90286	0.185611	0.833663
	Glyma15g05010	-0.254856	0.959986	0.821566	-0.210348	1.31126
	Glyma10g06810	-2.07488	-0.398468	2.22011	-0.764376	1.82854
