# Supplementary material for: RNA-Seq Analysis of Differential Gene Expression Responding to Different Rhizobium Strains in Soybean (Glycine max) Roots
Source: Front Plant Sci. 2016 May 30;7:721. doi: 10.3389/fpls.2016.00721 (PMC4885319; doi:10.3389/fpls.2016.00721)
Supplement: Supplementary file 6 [file Table6.XLSX]

## Sheet: Sheet1
Supplemental Table S6 The expression analysis of 189 candidate genes in roots and/or nodule according to two databases.
	FPKM (Phytozome 10.3)			Digital gene expression counts of the uniquely mappable reads (Soybase)
	nodules	root	root_hairs		root	nodule
Glyma01g01420	0.858	0.719	0.319		13	0
Glyma01g04370	34.058	0.293	0.265		0	37
Glyma01g05710	0.007	0.014	0		1	3
Glyma01g29030	2.152	0.012	0.275		0	0
Glyma01g29930	0.134	1.433	0.313		10	2
Glyma01g32190	10.579	0.472	0.202		0	7
Glyma01g35420	0.941	0.446	0.763		1	0
Glyma01g39160	4.683	2.509	5.786		17	0
Glyma01g42350	0.359	1.582	0.868		1	1
Glyma01g43350	0.339	0.398	0.915		7	2
Glyma02g04990					3	2324
Glyma02g05450	0.357	13.565	1.178		1	0
Glyma02g05470	2.164	18.748	2.483		10	1
Glyma02g09670					0	10
Glyma02g31490	0.152	1.546	0.371		6	0
Glyma02g37330	64.651	0	26.719		0	2979
Glyma02g38650	3.196	4.698	4.854		42	6
Glyma02g40380	4.8	1.302	9.229		218	5
Glyma02g42180	5.522	9.193	7.812		63	170
Glyma02g42470	1.641	1.131	1.625		21	5
Glyma02g48090	0.067	0	0.014		0	1
Glyma03g07680	0.015	0.24	0.169		21	4
Glyma03g22230	1.939	5.873	1.877		42	31
Glyma03g27120	1.213	10.535	3.14		10	0
Glyma03g36170	2.836	1.672	2.793		22	0
Glyma03g38000	0.046	0.77	0.04		0	0
Glyma04g04270	11.205	54.63	16.704		205	21
Glyma04g04510	4.395	0.174	0.996		17	121
Glyma04g05500	1.849	0.333	2.987		1	8
Glyma04g06470	0.02	0	0		0	0
Glyma04g09290	19.086	3.712	13.875		41	351
Glyma04g35880	0.34	0.059	0.108		3	0
Glyma04g38270	5.592	3.933	4.759		66	7
Glyma05g03750	13.039	43.413	0.048		0	10
Glyma05g05420	0.7	23.906	0.991		0	0
Glyma05g07800	0.862	2.978	0.217		2	5
Glyma05g19630	0.645	4.83	0.866		12	81
Glyma05g26520	6.234	0.95	1.926		66	28
Glyma05g29230	1.305	0.377	1.901		19	0
Glyma05g36210	1.264	12.204	2.017		0	2
Glyma05g36290	17.174	3.308	10.993		5	97
Glyma05g37990	54.915	0.064	7.579		0	634
Glyma05g38450	0.682	0.796	0.204		1	9
Glyma06g09670	19.628	0.284	2.418		6	207
Glyma06g12470	0	12.402	1.548		0	0
Glyma06g17180	0.056	0.862	0.048		0	0
Glyma06g30340	3.414	1.901	3.657		0	12
Glyma06g33080	48.286	1.614	19.226		1	309
Glyma06g40490					4	0
Glyma06g43620	24.881	18.712	9.25		0	0
Glyma06g43970	9.258	0.061	10.541		13	49
Glyma06g46410	0.143	0.265	0.208		1	0
Glyma07g02080	0.136	0.222	0.189		0	0
Glyma07g04340	34.861	751.566	690.581		5	0
Glyma07g14560	0.909	3.515	1.146		3	3
Glyma07g17230	7.001	12.466	17.324		51	4
Glyma07g18280	0.852	0.206	0.576		0	6
Glyma08g03570	2.066	0.038	0.677		3	96
Glyma08g07130	0.075	0.782	0.142		0	0
Glyma08g08360	0.213	0.364	0.796		0	4
Glyma08g09300	8.055	0.197	0.827		35	59
Glyma08g10190	0.124	0.144	0.251		1	46
Glyma08g16610	0.071	0	0.053		0	0
Glyma08g17270	112.474	2.872	0.327		0	25
Glyma08g19290	123.266	83.45	154.413		697	700
Glyma08g21130	0.26	8.748	1.532		2	0
Glyma08g23340	11.982	6.695	5.278		37	90
Glyma08g25590	0.587	0.955	0.236		5	0
Glyma08g40000	3.511	2.606	2.011		15	40
Glyma08g42440	3.765	111.2	17.286		42	0
Glyma08g42450	5.889	20.052	10.608		44	24
Glyma08g43790	7.748	0.044	2.768		3	239
Glyma09g03160	0.507	0.482	0.173		3	0
Glyma09g03620	10.06	0.752	2.883		19	90
Glyma09g06190	2.018	0.025	0.484		9	10
Glyma09g09750	38.151	8.383	18.057		173	594
Glyma09g15200	8.394	1.66	1.365		20	1
Glyma09g24080	0.054	0.068	0.133		6	0
Glyma09g27600	20.488	8.649	0.484		4	6
Glyma09g27700	1.983	1.037	0.217		6	0
Glyma09g37050	0.717	11.52	0.69		13	0
Glyma09g39000	2.376	2.909	2.351		48	13
Glyma09g41110	17.299	1.819	7.308		27	363
Glyma10g06390	48.352	0.061	8.352		0	103
Glyma10g10240	136.685	8.2	23.74		23	990
Glyma10g16790	24.511	46.339	75.502		195	39
Glyma10g21970	2.456	2.25	2.248		12	27
Glyma10g23690	16.058	0.346	4.825		0	380
Glyma10g27860	2.033	16.574	0.932		5	60
Glyma10g30710	3.415	2.4	10.216		84	4
Glyma10g32820	8.956	226.373	6.123		34	1
Glyma10g34490	7.907	5.454	12.459		20	15
Glyma10g34890	0.513	0.371	0.421		11	28
Glyma10g37260	0.06	0.209	0.053		1	0
Glyma10g37920	0	0.025	0		0	3
Glyma11g05680	65.227	48.796	107.807		1767	781
Glyma11g05920	0.061	1.899	4.901		0	0
Glyma11g09060	2.9	2.365	1.549		23	33
Glyma11g09070	0.351	0.715	0.287		1	18
Glyma11g09710	23.295	0	11.957		0	2577
Glyma11g11190	2.683	3.535	6.702		165	28
Glyma11g27820	2.047	0.783	2.938		8	22
Glyma11g34210	0.017	0.184	0.151		13	2
Glyma11g35710	1.985	2.305	3.052		15	0
Glyma12g09270	4.556	13.239	12.501		53	38
Glyma12g22880	0.625	5.383	1.264		3	3
Glyma12g29540	2.478	0.195	0.236		0	32
Glyma12g33320	0.804	1.921	3.202		4	2
Glyma13g11150	1.702	1.262	1.727		9	1
Glyma13g16430	28.703	0.039	3.853		0	72
Glyma13g25260	44.294	23.877	22.959		3	36
Glyma13g32490	0.773	1.856	0.874		18	0
Glyma13g32510	0.038	3.141	0.309		0	0
Glyma13g32560	66.22	0.994	28.697		51	237
Glyma13g35890	2.912	0.499	3.128		9	8
Glyma13g37810	3.909	1.077	4.592		34	63
Glyma14g04800	1.156	1.715	8.634		12	20
Glyma14g06710	0.899	2.651	2.635		21	0
Glyma14g11530	0.323	0.337	0.278		11	1
Glyma14g20670	0.335	0.031	0.344		5	4
Glyma14g24030	1.245	0	0.962		53	54
Glyma14g27900	0.832	0.092	0.941		27	3
Glyma14g35580	29.777	0	11.418		0	1793
Glyma14g39260	0.714	0.789	0.704		7	2
Glyma15g02490	0.404	0.1	0.502		1	0
Glyma15g02510	5.601	0.136	12.441		74	0
Glyma15g02520	1.261	0.082	1.147		16	0
Glyma15g04620	22.049	0.583	8.821		1028	16
Glyma15g05810	0.142	0.114	0.068		0	0
Glyma15g06680	6.431	4.331	1.937		30	60
Glyma15g06830	0	0.328	0		0	0
Glyma15g07080	0.404	0.37	0.219		8	3
Glyma15g07820	4.067	20.994	1.005		21	5
Glyma15g08840	0.338	0.03	1.625		37	0
Glyma15g17460	0.306	0.03	0.125		1	43
Glyma15g18340	6.115	0	0.754		0	62
Glyma15g18860	1.145	5.623	2.368		6	0
Glyma15g19910	0.142	0.65	0.506		5	131
Glyma15g38670	6.011	7.771	10.068		35	8
Glyma15g39040	0.324	1.006	0.222		0	0
Glyma16g00950	0.142	1.101	0.627		0	0
Glyma16g03760	34.295	28.527	67.904		940	261
Glyma16g03770	4.333	0	2.237		0	192
Glyma16g04410	6.988	40.693	0.608		2	1
Glyma16g06950	4.009	6.952	2.183		1	0
Glyma16g26740	2.189	0.258	0.423		0	1
Glyma16g32600	23.297	0.921	2.303		1	195
Glyma17g05760	15.048	25.329	12.89		4	56
Glyma17g07440	8.922	9.018	0.122		22	1
Glyma17g14630	1.366	2.168	0.195		1	0
Glyma17g16400	60.934	3.599	35.444		93	4606
Glyma17g19830	0.425	3.532	10.875		1	0
Glyma17g20340	2.901	3.236	11.437		1	0
Glyma17g33470	5.656	100.42	2.62		78	17
Glyma17g33670	2.525	2.804	5.154		46	0
Glyma17g34220	8.261	1.156	10.334		0	0
Glyma17g36630	3.011	2.466	2.528		9	27
Glyma18g01450	2.621	0.444	1.767		30	5
Glyma18g07000	1.336	10.182	0.765		58	2
Glyma18g08180	51.642	22.873	36.544		35	298
Glyma18g12180	19.919	211.852	49.994		161	9
Glyma18g12210	53.295	188.811	74.276		378	65
Glyma18g12280	11.069	37.056	14.99		202	104
Glyma18g16170	0.657	0.754	0.525		0	5
Glyma18g32880	2.951	2.108	4.016		7	1
Glyma18g39970	0.792	0.134	0.215		4	2
Glyma18g42610	0.008	0.014	0		0	0
Glyma18g42730					0	7
Glyma18g44870	7.104	0.911	0.488		4	7
Glyma18g49240	59.923	83.801	202.248		1326	588
Glyma18g50990	72.596	0.119	21.118		0	1171
Glyma18g52050	39.568	7.598	20.25		158	292
Glyma18g53940	0.841	0.771	0.412		4	0
Glyma19g03760	0.963	4.064	5.573		20	0
Glyma19g03770	2.532	6.208	15.256		29	4
Glyma19g33440	11.581	3.528	2.301		7	151
Glyma19g33460	1.032	0.118	1.048		5	7
Glyma19g41080	0.957	0.942	0.262		38	0
Glyma20g02420	13.3	3.711	4.21		50	393
Glyma20g04400	1.243	2.204	0.322		1	0
Glyma20g04840	3.022	0	0.682		7	42
Glyma20g08250	2.674	6.23	5.059		5	0
Glyma20g23820	0.055	0	0.079		2	0
Glyma20g27310	6.75	4.794	4.724		73	54
Glyma20g27660	0.677	2.879	0.296		21	1
Glyma20g27790	0.293	0.079	0.188		13	10
Glyma20g29250	0.168	1.295	0.531		7	0
Glyma20g32860	11.657	4.17	5.055		57	605
Glyma20g34830	5.36	19.621	0.553		3	1
